# Supplementary material for: Optical tools for visualizing and controlling human GLP-1 receptor activation with high spatiotemporal resolution
Source: eLife. 2023 Jun 2;12:RP86628. doi: 10.7554/eLife.86628 (PMC10262203; doi:10.7554/eLife.86628)
Supplement: Figure 1—figure supplement 1—source data 1. [file elife-86628-fig1-figsupp1-data1.xlsx]

## Sheet: Panel a (Del_Nterm)
GLP1 prototype	D16	D23
39.9225	164.575	140.496
34.3981	36.8244	76.0747
22.0061	50.3526	86.7734
32.1278	53.4216	77.841
66.4224	49.4533	189.162
	52.6669	82.9264
	57.9068	98.7804
		85.1559
		216.067
		79.9712
		134.268
		142.061
		89.2567
		72.8771
		35.1102

## Sheet: Panel b (ICL2)
Del 1-23	LtoK	StoK	VtoK	SLtoKK
140.496	160.604	70.9141	94.772	201.977
76.0747	104.147	86.8825	128.881	165.616
86.7734	180.631	163.503	102.954	83.6363
77.841	251.048	147.527	165.009	99.3997
189.162	172.477	196.409	140.316	122.959
82.9264	154.523	149.511	54.55	75.7507
98.7804	188.755	168.889	140.853	161.959
85.1559	184.507	225.662	175.507	102.152
216.067	199.851	67.5309	140.864	31.5881
79.9712	286.494	183.775	68.0355	146.619
134.268	110.055	168.256	154.232
142.061	196.086	180.632	47.3898
89.2567	251.05	197.987	172.506
72.8771	102.113	195.802	131.988
35.1102	164.566	152.459	86.5632
	119.681	198.46	228.493
	141.673	135.98	95.6344
	148.477	288.847	106.659
	125.83	183.775	77.9053
	193.118	168.256	102.016
	152.627		77.5544
	288.335
	251.417

## Sheet: Panel c (Pico Screen)
	Normalized ΔF/F0 (%)
Variant 1	-0.228565
Variant 2	-0.226385
Variant 3	-0.218378
Variant 4	-0.203748
Variant 5	-0.179495
Variant 6	-0.170858
Variant 7	-0.160209
Variant 8	-0.140692
Variant 9	-0.121905
Variant 10	-0.109922
Variant 11	-0.0948384
Variant 12	-0.0928371
Variant 13	-0.0721134
Variant 14	-0.0715479
Variant 15	-0.0653816
Variant 16	-0.0367248
Variant 17	-0.0257407
Variant 18	-0.0228798
Variant 19	-0.0207745
Variant 20	1.40274e-05
Variant 21	0.0032768
Variant 22	0.0080896
Variant 23	0.00904793
Variant 24	0.0189831
Variant 25	0.0306119
Variant 26	0.0365694
Variant 27	0.0435881
Variant 28	0.0548731
Variant 29	0.0644769
Variant 30	0.0696781
Variant 31	0.0754778
Variant 32	0.0763125
Variant 33	0.0833748
Variant 34	0.112085
Variant 35	0.136479
Variant 36	0.14349
Variant 37	0.143897
Variant 38	0.146934
Variant 39	0.147539
Variant 40	0.148272
Variant 41	0.148345
Variant 42	0.149639
Variant 43	0.152423
Variant 44	0.159339
Variant 45	0.159886
Variant 46	0.162284
Variant 47	0.167555
Variant 48	0.171322
Variant 49	0.174497
Variant 50	0.177952
Variant 51	0.177994
Variant 52	0.181682
Variant 53	0.188041
Variant 54	0.188088
Variant 55	0.19143
Variant 56	0.192507
Variant 57	0.195136
Variant 58	0.19765
Variant 59	0.199821
Variant 60	0.201653
Variant 61	0.204323
Variant 62	0.209271
Variant 63	0.216404
Variant 64	0.218855
Variant 65	0.220046
Variant 66	0.223668
Variant 67	0.225476
Variant 68	0.23144
Variant 69	0.232777
Variant 70	0.23872
Variant 71	0.251895
Variant 72	0.259413
Variant 73	0.272829
Variant 74	0.274911
Variant 75	0.282156
Variant 76	0.28334
Variant 77	0.286135
Variant 78	0.288315
Variant 79	0.29341
Variant 80	0.305635
Variant 81	0.312617
Variant 82	0.312828
Variant 83	0.324408
Variant 84	0.327503
Variant 85	0.330161
Variant 86	0.351131
Variant 87	0.362009
Variant 88	0.369352
Variant 89	0.379652
Variant 90	0.386491
Variant 91	0.393598
Variant 92	0.405072
Variant 93	0.425753
Variant 94	0.505145
Variant 95	0.537707
Variant 96	0.61186

## Sheet: Panel d
GLPLight0.1	K336Y+T343N
160.604	518.928
104.147	362.076
180.631	342.339
251.048	337.921
172.477	280.125
154.523	199.397
188.755	310.709
184.507	336.658
199.851	388.833
286.494	328.964
110.055
196.086
251.05
102.113
164.566
119.681
141.673
148.477
125.83
193.118
152.627
288.335
251.417

## Sheet: Panel e (ER Export)
GLPLight0.2	GLPLight0.2+ ER export
518.928	422.284
362.076	536.144
342.339	551.04
337.921	495.159
280.125	166.823
199.397	500.66
310.709	441.906
336.658	597.59
388.833	607.847
328.964	844.233
	650.74
	550.784
	419.146
	375.189
	519.008
	464.374
	401.288
	530.258
	478.89
	565.761
	614.535
	622.497
	459.051
	256.061
	632.082
	652.454
	593.453
	579.209
	758.384
	668.722
	594.149
	846.939
	692.205
	500.731
	467.571
	385.868
	597.639
	483.488

## Sheet: Panel f(cpGFP-Mut)
GLPLight0.3	GLPLight0.3 + cpGFP mutations
422.284	508.711
536.144	609.767
551.04	584.419
495.159	494.797
166.823	560.727
500.66	583.025
441.906	540.622
597.59	609.204
607.847	366.002
844.233	653.723
650.74	493.376
550.784	333.59
419.146	250.718
375.189	460.438
519.008	530.626
464.374	527.35
401.288
530.258	391.548
478.89	519.225
565.761	541.012
614.535	524.066
622.497	496.93
459.051	428.828
256.061	423.531
	451.856
632.082	467.152
652.454	601.95
593.453	463.118
579.209	455.539
758.384	587.853
668.722
594.149
846.939
692.205
500.731
467.571
385.868
597.639
483.488

## Sheet: Panel g (brightness)
GLPLight0.3	GLPLight0.3 + cpGFP mutations
9333.75	13544.4

## Sheet: Panel h (Cterm-mutations)
GLPLight0.4	GLPLight1
508.711	495.42
609.767	582.515
584.419	465.168
494.797	460.847
560.727	280.825
583.025	598.699
540.622	573.786
609.204	618.194
366.002	623.551
653.723	648.954
493.376	461.306
333.59	572.232
250.718	439.703
460.438	418.268
530.626	450.32
527.35	445.419
391.548	383.073
519.225	387.544
541.012	380.209
524.066	483.567
496.93	526.851
428.828	446.764
423.531	605.384
451.856	488.072
467.152	406.351
601.95	498.815
463.118	318.348
455.539
587.853
