# Supplementary material for: Optical tools for visualizing and controlling human GLP-1 receptor activation with high spatiotemporal resolution
Source: eLife. 2023 Jun 2;12:RP86628. doi: 10.7554/eLife.86628 (PMC10262203; doi:10.7554/eLife.86628)
Supplement: Figure 1—figure supplement 2—source data 1. [file elife-86628-fig1-figsupp2-data1.xlsx]

## Sheet: Panel a (screening control)
GLPLight1	E138A	F390A	I313A	K197A+D198A	L141A	N240A	N300A	Q211A	R227A	R299A	T298A	W297A	M204A	E387A	N300A + I313A	N300A + Q211A	N300A + R227A	N300A + L141A	N300A +F390A	N300A + L141A + M204A	N300A + L141A + E387A
430.499	-27.9911	251.983	144.329	95.637	345.665	146.754	63.0566	425.623	352.509	363.843	155.679	-2.52857	250.44	117.726	-5.30705	84.9733	1.83164	43.2654	99.2836	-6.02763	-2.12072
420.486	-5.22071	271.098	155.847	98.4176	353.782	66.9358	178.725	331.333	373.459	348.589	192.128	-1.38843	168.088	47.1139	-5.62494	45.8482	-1.85445	21.2488	104.305	-3.22733	3.90107
682.097	-1.80341	204.329	113.878	71.5713	565.005	163.501	44.8601	293.745	470.384	354.553	389.093	0.572161	161.547	89.7367	1.36428	85.6702	-0.85113	22.0041	58.0194	-11.5065	-9.23296
731.967	-1.31139	158.995	55.9202	66.3647	412.36	242.221	22.3321	434.363	490.863	232.353	340.255	-4.40991	212.342	80.376	-13.6712	39.4955	-1.109	28.8051	101.791	-6.79506	4.54361
435.44	-12.6291	171.307	146.759	121.444	355.51	203.103	26.1823	569.72	265.449	285.171	147.761	-0.78153	209.479	141.562	-10.1107	20.1629	5.24006	41.8001	265.642	-17.2021	-3.47722
458.968	10.296	184.045		63.0203	316.602	111.284	41.1377	342.827	185.201	353.622	486.839	-19.2863	146.745	88.7951	-12.3775	104.674	-0.63345	35.272	21.008	-11.6611	6.36758
395.666	-2.74492	151.165		160.995	568.044	56.4039	23.0358	310.425	232.029	341.911	256.011	1.07305	211.659	62.1096	10.2186	64.2919	5.53608	25.2413	80.8188	10.2059	4.69845
289.547	-17.8335	92.3146		62.7506	180.871		54.1915	400.536	342.262	125.783			133.152	72.4883	-10.7124	63.6256	2.11634	15.2102	112.591	4.56389	-5.45816
485.022		117.958			224.859		45.6074	333.246	403.697	91.0358			230.758	80.844	-17.501	111.517		56.5635	78.5075	-19.6522	3.55987
400.279		227.851			402.696		9.17054	234.562	202.794	161.204					0.012966	56.7644		31.3421	20.1524	4.47185	-3.54518
					359.707		34.4841		94.3698						8.64489	61.5502		23.1039	86.1139	-6.5124	1.40655
					325.674		29.9299									23.4978		41.372		-2.51385	-23.1669
					282.549		51.9146									41.6771		5.92783		-8.78288	-6.61331
							71.0258											26.9508		2.79991	-6.61331
							37.7308											-6.07772		3.38225	8.24162
							53.496											44.6002		-20.8001	-10.2647
							26.1172											23.6857		-11.6752	-12.3382
							5.20425											16.8062		-8.94107	7.37869
							47.4477											93.5512			-3.45432
							99.915														4.51992
							130.781														3.00533
							72.7833
							60.5011
							100.233
							177.499
							108.213
							123.427
							63.3607
							106.934
							64.7729
							74.4081
							73.9935

## Sheet: Panel d (barplot)
HEK 293		Neuron
GLPLight1	GLPLight-ctr	GLPLight1	GLPLight-ctr
679.591	-2.12072	344.077	0.89994
715.723	3.90107	503.775	-1.05168
524.881	-9.23296	367.385	0.877099
610.056	4.54361	443.958	-0.41712
583.727	-3.47722	468.541	0.759844
587.348	6.36758	429.624	-1.15784
514.375	4.69845	546.817	0.679085
802.357	-5.45816	362.293	0.24104
333.044	3.55987	413.332	2.05868
474.559	-3.54518	460.151	-1.74311
454.891	1.40655	465.978	2.43773
480.847	-23.1669	433.414	3.81406
421.805	-6.61331	423.505	3.91961
429.598	-6.61331	589.821	2.99495
419.259	8.24162	570.603	6.13575
635.532	-10.2647	503.233	4.14479
484.149	-12.3382	445.065
473.031	7.37869	379.3
431.596	-3.45432	621.715
437.892	4.51992	430.467
495.42	3.00533	530.663
582.515		392.599
465.168		498.576
460.847		341.616
280.825		524.301
598.699		513.22
573.786		447.092
618.194		310.896
623.551		358.101
648.954		500.049
		442.383
		400.418
		493.569
		500.476
		483.966
