# Supplementary material for: Optical tools for visualizing and controlling human GLP-1 receptor activation with high spatiotemporal resolution
Source: eLife. 2023 Jun 2;12:RP86628. doi: 10.7554/eLife.86628 (PMC10262203; doi:10.7554/eLife.86628)
Supplement: Figure 1—figure supplement 3—source data 1. [file elife-86628-fig1-figsupp3-data1.xlsx]

## Sheet: Panel a (miniGs)
Time (sec)	GLPLight miniGs			GLP1R miniGs
0	1.00353	0.948322	0.991474	1.0036	0.988795	0.98047
5.59	0.980494	1.00223	0.954901	1.02444	1.02376	1.02298
10.233	0.975617	0.972317	1.04063	1.00555	0.993135	1.0012
14.872	0.925967	1.03331	0.961083	0.998947	1.00359	1.02294
19.513	0.995759	1.04508	0.981101	0.999952	1.04052	1.0068
24.154	0.97816	0.977318	1.03616	0.988765	1.04633	0.986064
28.799	0.970973	0.966919	0.99084	1.00593	1.01488	1.01075
33.438	1.00335	0.986626	0.998094	1.00803	1.07152	0.986048
38.081	0.99964	0.975519	1.03745	1.00399	1.00857	0.975286
42.724	1.01964	0.955054	1.01362	0.990502	1.03209	1.00403
47.366	1.02206	0.988321	0.972857	1.01315	0.990954	0.985471
52.009	0.993763	1.05662	0.976473	1.03982	1.00201	1.01479
56.651	1.00879	1.0093	0.95221	1.01324	1.02698	0.996676
61.293	0.977183	1.03821	1.0106	0.980119	1.03507	0.995183
65.93	1.02603	0.978799	1.02033	1.01821	0.98257	0.984684
70.578	1.00065	1.06686	1.05093	1.02765	1.04743	0.992792
75.219	0.997626	1.04602	1.01665	1.01219	0.951915	1.02365
79.869	0.982963	0.961504	1.00661	1.01106	0.989441	0.995454
84.513	1.01101	1.05463	0.977177	0.997861	1.04904	0.979478
89.165	0.984564	0.989899	1.01269	1.03235	0.969577	1.00026
93.813	0.978026	0.981101	0.949196	1.01784	1.02501	0.961473
98.451	1.01777	1.01043	0.986136	0.999474	1.01493	1.00005
103.097	0.961098	0.934832	0.991908	1.01693	0.990097	0.993712
107.74	1.0161	1.00544	0.964103	1.01933	1.03473	0.992904
112.387	0.981497	1.10255	0.977784	1.00029	0.922656	1.01205
117.035	1.00859	1.08436	0.986165	0.973739	0.988006	0.988684
121.679	0.944833	0.996486	0.989485	1.01059	0.982975	1.01102
126.323	0.951244	0.970457	0.988328	1.01469	0.974161	1.00582
130.963	1.00949	1.01449	1.06053	0.974924	0.97085	1.01081
135.613	1.01963	1.00799	1.04145	1.00776	0.964786	1.01164
140.258	0.992093	0.930773	1.04038	1.01557	0.962272	0.993446
144.904	0.97398	0.965816	0.957824	0.986818	1.03199	1.02098
149.547	1.00053	0.958064	0.927831	0.978941	1.01912	0.99289
154.194	0.982554	0.987556	1.04292	1.00812	0.972828	1.00036
158.835	1.02459	0.999838	1.00009	1.0035	0.995817	0.992934
163.476	1.0066	0.993812	0.992774	0.98825	0.976672	0.996521
168.117	1.02429	1.0545	0.983066	1.01377	1.02901	0.984348
172.761	1.02876	0.998875	0.946112	0.992496	1.04068	1.0173
177.404	0.998461	1.05691	1.0189	0.981423	1.02137	0.996724
182.045	0.978683	0.987141	0.938168	0.990746	1.04886	0.997882
186.693	0.986612	0.967709	1.00416	0.994082	1.02646	1.00822
191.336	0.941604	0.962513	1.00919	0.994249	1.04356	0.984977
195.981	1.01909	0.953318	1.01594	1.01401	1.01438	1.01926
200.624	1.00153	0.976761	0.991165	0.995367	0.977757	1.00787
205.265	1.03683	0.943543	0.990493	1.00362	0.994495	1.01723
209.917	0.997046	1.04051	1.03284	1.00832	1.02382	1.02587
214.557	0.984511	0.976624	0.950885	1.00784	1.07327	0.98229
219.196	1.07548	1.01152	1.07247	0.976765	0.997711	1.00712
223.84	0.97274	0.994169	0.982533	1.00756	0.942134	0.990031
228.483	1.04241	0.952592	0.993376	0.983562	1.0639	1.0075
233.123	1.00366	0.948008	0.964069	0.995831	1.00714	1.00275
237.765	1.01337	1.02684	1.02954	1.00005	1.06849	1.01396
242.41	1.01333	0.963395	1.02954	0.975597	1.01234	1.0191
247.048	1.02636	0.992139	1.01378	1.00384	0.988149	0.983581
251.69	0.99442	1.04999	1.05174	1.00436	1.00357	1.01606
256.34	0.994801	1.06186	1.02868	1.01039	1.0733	1.00947
260.98	1.01675	1.04665	0.968475	1.00947	0.981083	1.00384
265.628	0.990156	0.959508	1.00288	1.01228	1.01114	0.964444
270.27	0.941785	1.04136	0.971477	1.0097	0.94775	0.990118
274.913	1.02269	1.06756	0.956224	0.994583	0.989627	0.970631
279.556	0.993881	0.978788	1.03477	1.00063	0.942165	1.00356
284.197	1.0075	0.980587	0.976701	0.992218	0.990029	0.970773
288.845	1.03575	1.0662	1.01448	1.00594	0.970212	0.997415
293.493	1.00139	1.01071	1.01316	0.991335	1.0228	1.00029
298.133	1.0188	0.997168	0.987501	1.00523	0.951259	0.996987
302.779	1.01294	1.06387	1.07705	1.00434	0.989292	1.005
307.423	0.979835	0.942669	1.01147	1.00562	0.946218	0.997427
312.069	0.982879	1.03805	0.992719	1.01758	1.02211	1.01429
316.711	0.979203	0.9264	0.968755	1.01666	1.00458	0.992648
321.357	0.983213	0.982432	1.00376	1.01429	0.958643	0.997567
326.003	1.01655	1.05719	1.02985	1.01178	0.988813	1.01678
330.641	1.08815	0.858495	1.0081	0.973624	1.02085	1.00839
335.28	1.00087	0.981498	1.05465	0.984735	0.997757	0.994734
339.924	1.01149	1.00835	0.991366	1.02203	1.00748	1.0054
344.566	0.990147	1.01925	1.00106	0.995058	0.992778	1.01253
349.208	1.00103	0.930072	1.01848	1.00599	1.0799	1.00537
353.853	1.08587	1.05709	0.951452	0.989028	1.01484	0.995867
358.495	0.966617	0.995969	1.02636	0.99718	1.00382	1.0005
363.133	1.00449	0.955885	1.02489	0.985294	0.998389	1.01879
367.778	1.00085	0.96698	1.10195	0.99462	0.982062	1.01883
372.42	1.00162	1.01675	1.01197	0.980783	0.982799	1.00218
377.065	0.973364	0.998051	1.00645	0.977097	0.928386	0.999846
381.707	0.96258	1.0284	0.955491	1.01117	0.992631	0.995314
386.349	1.03294	1.01225	1.01031	0.988031	0.998379	0.993177
390.995	1.01368	0.952437	0.985366	0.988397	0.966673	0.972375
395.641	0.971069	1.0312	0.99174	0.979601	0.990394	0.989239
400.281	0.999219	0.90946	1.01154	0.985517	1.01688	1.02011
404.929	1.01702	1.01159	1.03018	0.986032	1.00924	0.993454
409.572	0.983052	0.986866	1.0125	1.00036	1.01615	0.9874
414.215	1.02543	1.01842	1.03786	0.998392	0.998005	0.988532
418.859	1.00184	1.04044	0.954324	0.994774	0.987846	1.02725
423.504	0.997292	0.987008	1.03338	1.01711	0.984668	1.01766
428.143	1.01211	0.971213	0.98665	0.995017	1.00241	0.992255
432.783	1.0062	1.00812	0.960547	0.960048	0.94769	0.979323
437.43	0.978758	0.995505	0.964927	1.00375	0.938658	1.0089
442.079	0.96082	1.01858	0.987978	0.957858	0.917127	0.97296
446.72	1.03376	1.1052	0.951791	0.991155	0.970732	1.00332
451.361	1.03465	1.06001	1.00278	0.980489	0.992225	1.00998
456.009	0.967891	1.01374	0.986344	1.0203	0.861897	1.02323
460.654	1.03351	0.990263	0.984867	0.9989	0.996209	0.999481
500.654	1.09472	1.24645	1.06091	4.63769	3.5751	3.52418
507.197	1.03377	1.14591	0.960294	4.83814	4.61159	4.08556
511.835	1.07113	1.17081	1.10093	4.91529	5.27657	4.40643
516.483	1.03712	1.10555	1.01028	5.13531	6.00254	4.7127
521.124	1.03944	1.09757	1.04973	5.22158	6.61662	5.01772
525.767	1.05136	0.993772	1.02206	5.18944	6.76282	5.13828
530.414	0.989816	0.997672	0.999779	5.39456	6.95102	5.2444
535.062	1.01171	1.01791	1.02932	5.41357	7.43749	5.43262
539.702	0.976659	0.980309	0.999717	5.46232	8.04911	5.63108
544.342	1.01084	0.972414	1.05488	5.46189	8.29086	5.62665
548.993	0.963646	1.03949	1.04124	5.55236	8.56761	5.73886
553.638	1.01654	0.926493	1.05879	5.4245	8.6193	5.83571
558.278	1.07538	1.04009	1.00253	5.41532	8.25044	5.74862
562.928	1.01336	1.04968	1.04443	5.43764	8.74173	5.77578
567.573	1.0367	0.997364	0.990451	5.44388	8.26563	5.9926
572.213	1.01129	1.05421	0.926058	5.47258	8.57015	5.88911
576.855	0.989091	1.01808	1.08489	5.54825	8.88751	6.04623
581.498	0.992201	1.06772	0.93763	5.61779	8.86414	6.05701
586.144	0.973391	1.03724	0.945854	5.55615	8.7891	6.07804
590.785	0.985192	0.95305	0.975979	5.43903	8.98716	5.90194
595.427	1.03584	0.990278	1.02214	5.46713	9.70642	6.09034
600.073	1.02083	0.999156	1.03802	5.5491	9.07638	6.15543
604.717	1.02128	0.961805	0.933537	5.45256	9.11871	6.18916
609.355	1.05087	0.994015	1.05346	5.46607	9.25126	6.18272
614.003	0.98773	1.15724	1.09787	5.49744	9.61995	6.04375
618.649	1.03024	0.988296	0.923483	5.44266	9.97588	6.12118
623.29	1.00903	0.950903	1.05515	5.54132	9.72125	6.06695
627.932	1.00088	1.05172	1.06274	5.53172	9.55202	6.011
632.586	1.02941	0.982356	1.04908	5.57288	9.63848	6.103
637.234	0.995621	1.02424	1.04564	5.47686	9.16557	6.1864
641.874	0.966985	1.01467	0.956218	5.5188	9.09245	6.23298
646.532	0.993237	0.958034	0.989913	5.43809	9.60999	6.10126
651.182	0.978685	1.00109	1.01955	5.5047	9.24492	6.11719
655.825	1.01873	1.02733	0.965458	5.48484	9.34503	6.21152
660.467	0.997033	1.058	1.02071	5.48812	9.84933	6.19424
665.116	1.01396	1.01755	0.991357	5.6337	9.26433	6.17868
669.759	0.95938	1.10739	1.02508	5.53023	9.46659	6.01432
674.404	1.00003	0.976491	1.0564	5.58195	9.47564	6.06138
679.053	1.01092	1.01188	1.06127	5.50166	9.85963	5.91722
683.701	0.958652	1.03066	0.993697	5.51201	9.84956	6.00659
688.339	0.99933	1.03066	1.06902	5.44269	9.87075	6.06547
692.981	1.00191	1.02745	1.0117	5.47158	10.0265	5.97042
697.633	0.980236	1.10514	1.05798	5.52154	9.64706	6.16651
702.279	0.99495	0.931449	1.01572	5.48814	9.27592	6.22871
706.922	0.976275	0.992857	1.04377	5.45824	9.14138	6.14222
711.568	0.954308	1.00863	0.951184	5.31406	9.19963	6.13121
716.214	1.03508	0.95537	0.969189	5.51568	9.41465	5.80456
720.852	0.96827	0.934996	1.03355	5.4379	8.98754	6.0984
725.498	0.987845	1.02999	1.05149	5.52952	9.31549	6.05766
730.149	1.0083	1.00449	1.06092	5.44294	9.55893	6.15172
734.796	0.977569	0.930569	1.06882	5.4548	9.68377	5.90166
739.438	1.02398	1.07707	1.02565	5.35823	9.57575	6.00263
744.089	0.975614	0.928133	1.03809	5.42211	9.39313	5.87034
748.74	0.959728	0.941904	1.01825	5.47675	9.06785	5.92083
753.382	0.968654	0.925592	1.06024	5.35781	9.78597	5.98944
758.032	0.999581	0.993023	1.09251	5.34336	8.90931	6.11188
762.683	1.02452	1.00091	0.992445	5.3451	9.40411	6.02877
767.333	0.987466	0.960845	1.01635	5.31234	9.41829	5.92296
771.973	0.927264	0.977131	1.04409	5.42513	9.0816	5.98125
776.617	0.98709	1.06897	1.134	5.29445	9.44991	5.91132
781.267	0.933678	1.07901	1.14056	5.3958	9.10841	5.98203
785.907	1.02891	1.07255	0.975152	5.17897	9.28243	5.86304
790.553	0.979819	1.02901	1.09677	5.24255	9.04609	5.83461
795.206	1.01229	1.02782	0.997673	5.38536	9.37733	5.93075
799.852	1.012	1.08403	1.04162	5.28687	9.31365	5.81071
804.492	0.99403	0.929797	1.0377	5.26154	9.10869	6.12786
809.14	1.0172	1.08851	1.00904	5.3163	9.30368	5.86479
813.794	0.986155	0.900691	1.07821	5.35818	9.60741	5.83211
818.434	1.03537	0.944874	1.05325	5.29568	8.97518	5.89142
823.078	1.01991	0.97246	1.00556	5.34446	9.18969	5.70477
827.73	1.0305	0.930364	1.00244	5.26255	9.59729	5.80978
832.38	1.0339	1.00321	1.01133	5.23651	8.52147	5.91175
837.022	1.02203	0.990914	1.03334	5.21769	9.24625	5.6292
841.666	1.0564	0.987108	1.05028	5.16535	8.87766	5.80676
846.31	0.92884	1.03138	0.933025	5.14626	9.16139	5.93105
850.952	0.946384	0.874259	0.999819	5.15813	9.37934	5.75328
855.594	0.988585	1.07379	0.986359	5.32139	9.05813	5.7633
860.236	1.03299	0.891078	1.01119	5.12459	8.82846	5.87363
864.88	1.00835	0.890783	0.920622	5.14793	9.01823	5.80639
869.519	1.02065	0.896419	1.01576	5.12848	9.28173	5.64754
874.16	0.992237	1.00306	0.994536	5.20416	8.87557	5.81916
878.806	1.11538	1.00537	0.994816	5.17081	9.22275	5.73926
883.444	0.970303	0.934483	1.02459	5.20636	9.10916	5.74292
888.086	1.03926	1.10074	0.9861	5.12742	9.18712	5.72771
892.726	1.02891	1.09471	0.973477	5.17078	9.32079	5.66708
897.368	0.950046	1.02747	1.02066	5.16967	9.26215	5.85835
902.006	0.961669	0.955351	1.02369	5.19994	8.72378	5.71221
906.643	1.02446	1.06415	1.00879	5.13763	9.22484	5.5949
911.288	0.988127	0.975053	1.08139	5.17143	8.16929	5.74866
915.928	1.04984	1.05436	1.09037	5.11319	8.94323	5.68573
920.568	0.999682	1.05723	1.06346	5.1885	8.67131	5.62341
925.214	1.046	1.02071	1.04775	5.26444	9.03894	5.64547
929.856	1.03453	0.993179	1.03434	5.17725	8.79066	5.59589
934.496	0.957063	0.969903	1.03941	5.1739	9.02793	5.6302
939.138	1.04839	0.97665	1.0473	5.06448	9.27148	5.78204
943.779	0.962344	0.961933	0.963002	5.23415	8.79329	5.70558
948.418	0.970403	1.03858	0.984657	5.10707	8.57576	5.48216
953.059	0.985425	0.975459	1.02717	4.9325	9.14145	5.60828
957.696	0.950418	0.941758	1.03603	5.12338	8.41159	5.65961
962.338	0.982011	1.02362	0.977383	5.12825	9.20693	5.75574
966.976	0.966866	1.05612	0.971978	5.21654	8.62479	5.56704
971.614	0.98847	1.15251	1.06014	5.10978	9.44341	5.53409
976.256	0.986106	1.01974	1.00691	5.06759	8.65164	5.44005
980.895	0.987351	1.01003	1.03865	4.95971	9.4391	5.34476
985.535	1.02665	1.02474	0.985063	5.13559	8.42893	5.68837
990.174	1.00169	1.04089	1.0253	5.0777	8.71841	5.60717
994.82	0.971348	0.954673	0.967516	5.07715	9.03949	5.55661
999.465	1.01452	1.01284	1.00042	5.0054	9.14733	5.51015
1004.11	0.964262	0.974821	1.06333	5.03004	9.03257	5.5588
1008.75	0.989289	1.06502	0.998318	5.10395	8.7621	5.65006
1013.39	0.993002	1.05095	0.929978	5.00212	8.92226	5.55789
1018.03	0.999105	0.960018	0.988705	5.0968	8.3093	5.42636
1022.68	1.02643	0.987064	0.985952	4.90292	8.69728	5.45619
1027.32	1.02161	0.924658	0.981883	4.94249	8.82909	5.64889
1031.96	1.03896	0.898619	0.980048	4.89481	8.52751	5.57901
1036.6	1.04155	0.957264	1.04648	5.03859	8.59137	5.50537
1041.25	1.04531	1.05846	0.978759	5.1317	8.29762	5.41061
1045.89	1.03281	0.950998	1.06652	4.96182	8.5265	5.40552
1050.53	0.975877	1.12632	0.977308	5.01714	8.75705	5.47802
1055.17	0.998854	1.05277	1.06455	4.95399	8.14202	5.51986
1059.81	1.01778	0.864306	1.00328	4.89401	8.48877	5.49936
1064.45	0.99371	1.04107	0.954207	4.96141	8.78198	5.48707
1069.09	0.999865	0.980356	0.978706	4.83472	8.41486	5.59428
1073.73	1.0356	0.975751	1.01791	4.86292	8.68572	5.56951
1078.37	1.04728	0.976758	0.986239	5.00192	8.507	5.50436
1083	0.995337	1.11268	1.06765	4.87817	8.90999	5.34924
1087.64	0.952423	0.961178	1.03208	4.8565	8.63294	5.49503
1092.29	1.02951	1.038	1.08078	4.88886	8.40181	5.56241
1096.93	1.02762	1.00365	0.967581	5.03258	8.74451	5.36963
1101.56	0.975146	1.04673	0.996107	4.86085	8.59949	5.38861
1106.21	1.06399	1.08559	0.982459	4.89485	9.17619	5.43549
1110.85	0.960357	1.06075	1.05219	4.81328	8.78869	5.50359
1115.49	0.971417	1.07218	0.985116	4.85051	8.11587	5.42324
1120.13	1.06033	1.07855	1.02424	4.8845	9.00791	5.45188
1124.78	0.971281	1.00917	1.06265	4.85572	8.69419	5.29492
1129.42	1.04852	1.07471	0.947254	4.89741	8.23837	5.34528
1134.06	1.00001	0.961534	0.961106	4.80966	8.47896	5.35673
1138.7	1.00679	1.01861	0.984313	4.84472	8.19824	5.44846
1143.35	0.981492	1.10158	0.933073	4.89935	8.42989	5.36733
1147.98	0.99969	1.0588	0.94638	4.86045	8.51245	5.43288
1152.63	1.03054	1.02517	1.00449	4.82184	8.19109	5.31752
1157.27	1.03256	0.971998	0.940127	4.78253	7.82805	5.33243
1161.91	1.00718	1.00181	0.932945	4.86118	8.53935	5.50014
1166.55	0.985608	0.97921	1.07275	4.85863	8.36311	5.37861
1171.2	0.98943	1.06296	1.00288	4.70062	8.4488	5.29476
1175.84	1.00151	1.05771	0.998041	4.81978	8.13454	5.39965
1180.49	1.02063	1.01425	1.04278	4.75107	8.36181	5.3358
1185.13	1.03974	1.09512	0.949752	4.96317	8.59032	5.47025
1189.77	0.962051	1.02029	0.990227	4.89949	8.54396	5.3197
1194.41	1.06109	0.976433	1.02347	4.65552	8.26304	5.33626
1199.06	0.998153	0.999364	0.979478	4.81739	8.37496	5.29972
1203.7	0.989256	1.0457	1.02818	4.74781	7.89137	5.34631
1208.34	1.00302	0.982376	1.00845	4.83199	8.40124	5.45275
1212.98	1.02956	1.12793	1.06329	4.744	8.42925	5.27774
1217.62	1.07644	0.941305	1.05695	4.69371	8.68622	5.4965
1222.26	0.966799	0.996986	1.13046	4.68293	8.16475	5.22866
1226.9	0.988059	1.13487	1.04202	4.72557	8.18948	5.26743
1231.54	1.02593	1.02126	1.02663	4.71856	8.35693	5.26555
1236.19	0.93559	0.948968	0.97916	4.70748	8.47239	5.28498
1240.83	1.04138	0.984009	1.08239	4.65931	8.15331	5.48097
1245.47	1.00285	1.06789	1.0189	4.73571	7.78816	5.19212
1250.11	1.03672	0.966414	1.04686	4.8198	8.26093	5.40005
1254.75	1.08726	1.03769	0.999762	4.74707	8.23779	5.3708
1259.4	1.04023	1.05631	1.05696	4.73226	8.0838	5.29944
1264.04	0.946479	0.969681	1.05321	4.63335	8.913	5.38363
1268.68	0.988635	1.15344	0.994777	4.71349	7.92814	5.45236
1273.33	1.02423	1.10649	1.06212	4.68421	8.29366	5.57168
1277.97	1.01463	1.04387	0.994912	4.73517	8.36815	5.30891
1282.61	1.05843	1.06427	1.03785	4.538	8.0671	5.27506
1287.25	1.00896	1.07887	1.04046	4.61637	8.01005	5.31382
1291.89	0.99754	1.17058	0.9205	4.7705	8.37226	5.35737
1296.53	1.03504	1.05871	1.02164	4.68694	8.11853	5.21552
1301.18	0.98669	0.940975	1.05564	4.71819	8.73246	5.20155
1305.82	1.05625	1.09362	1.03864	4.63835	8.18807	5.3307
1310.46	1.05144	0.921239	0.982756	4.73258	8.2364	5.45595
1315.1	1.01482	0.919856	0.985943	4.57855	7.82947	5.23919
1319.74	1.03381	1.01988	1.05353	4.51907	8.13179	5.22169
1324.38	1.04551	1.05362	1.04415	4.68559	8.05967	5.20708
1329.02	1.00194	1.02717	1.10429	4.65619	7.91223	5.10878
1333.66	1.03611	1.00082	0.974871	4.68046	8.03543	5.3183
1338.31	1.07606	1.08496	1.0251	4.63333	8.15089	5.19848
1342.95	1.05151	1.15809	1.09945	4.594	8.57268	5.16146
1347.6	1.02155	1.05564	0.968909	4.63584	8.07332	5.21358
1352.24	1.00929	0.979991	0.986764	4.45897	7.90254	5.29526
1356.88	0.991355	1.08427	0.9909	4.58005	8.38655	5.15355
1361.52	1.01791	1.10151	1.02349	4.6888	8.09808	5.13593
1366.17	1.10308	0.967624	1.06333	4.56863	7.78659	5.15763
1370.82	0.947416	1.05712	1.06692	4.479	8.02562	5.20071
1375.45	0.977047	1.06312	0.983276	4.5726	8.23184	5.08167
1380.1	1.08546	0.970788	1.06654	4.4841	8.17824	5.25742
1384.73	1.05556	1.07009	1.13057	4.54911	8.11047	5.22006
1389.37	0.986437	0.96037	1.05309	4.56643	8.06536	5.22215
1394.01	1.02656	1.05291	1.05241	4.49208	8.19953	5.15927
1398.66	1.00797	1.0033	1.01472	4.54332	8.00339	5.20019
1403.35	1.01473	1.09491	1.02242	4.58488	8.5228	5.16292
1407.99	0.962686	1.0097	0.987843	4.47213	8.45102	5.21056
1412.63	1.03315	0.967918	1.0486	4.51843	7.91463	5.14776
1417.28	0.983342	0.935594	0.91942	4.45645	8.20233	5.28754
1421.92	1.02813	1.17323	0.967694	4.56012	8.49294	5.18088
1426.56	1.03365	0.956409	1.00572	4.49806	8.32021	5.34869

## Sheet: Panel b (miniGs Barplot)
GLPLight	GLP1R
1.00087	5.50646
1.01772	9.52162
1.02144	6.10983

## Sheet: Panel c (miniGq)
Time (sec)	GLPLight miniGq			GLP1R miniGq
0	0.927779	0.859942	0.874343	1.02883	1.01631	0.984233
5.59	1.15669	0.97692	1.09383	1.02698	0.922699	1.04766
10.233	1.02941	0.941606	1.09919	0.981089	1.06026	1.00048
14.872	1.07433	0.808326	1.00506	0.957066	1.03122	1.00332
19.513	0.906133	1.07457	1.03964	1.00615	1.07008	0.950822
24.154	0.93814	0.912459	1.138	0.996561	1.01197	1.01382
28.799	0.882198	0.90459	1.0043	0.988996	1.06896	1.04999
33.438	0.932337	0.918696	0.973663	1.0209	0.991907	0.984566
38.081	0.774999	0.939118	0.986467	0.980668	0.999898	1.05965
42.724	1.05269	0.930786	0.933065	0.983688	0.934456	0.99556
47.366	1.12582	1.0685	1.03643	1.02976	1.03093	1.01629
52.009	0.867679	0.985121	0.958564	0.978902	1.00995	0.978595
56.651	0.911156	0.930314	0.924411	0.996059	1.00324	0.99977
61.293	1.02769	1.00825	1.05213	0.975233	1.03697	1.0934
65.93	1.16694	1.07482	0.943182	1.00147	0.981091	1.06615
70.578	1.09732	0.991082	1.00071	0.986508	0.990746	1.01682
75.219	0.907696	1.11057	1.06574	0.972482	0.99188	0.99387
79.869	0.928564	0.836822	1.00899	1.01344	1.00708	0.963891
84.513	1.06648	0.897164	0.939864	1.0269	0.966632	1.09124
89.165	0.991298	1.03113	1.02102	1.01168	1.02146	0.995487
93.813	1.0767	1.02563	1.21593	1.00176	0.95683	1.02852
98.451	0.968406	0.914812	1.03841	1.019	1.06496	0.948675
103.097	0.990655	1.04049	1.02615	0.987316	1.01089	0.983105
107.74	0.898201	1.01404	0.939127	0.998521	0.99273	0.972522
112.387	1.10195	1.03899	0.887791	0.989861	0.992031	0.996709
117.035	0.971489	0.984814	0.908274	0.977354	0.979155	1.02387
121.679	0.894133	1.04137	0.998366	0.978764	1.01909	1.03979
126.323	1.08404	1.06996	0.931184	1.03865	1.02161	0.952042
130.963	1.05098	0.981677	1.02757	0.990716	0.992409	0.973042
135.613	1.04383	0.855919	0.9196	0.99294	1.03958	0.994128
140.258	0.99078	0.963227	1.09291	0.982262	0.994792	0.950277
144.904	1.01301	1.05069	1.01899	1.03272	0.992633	1.03907
149.547	0.906218	1.06165	1.04015	0.996571	1.04783	1.04281
154.194	0.909486	0.886373	0.948857	0.937163	0.964651	1.04564
158.835	0.991344	0.998887	1.02249	1.03483	0.995088	1.00485
163.476	1.0264	1.04516	0.945548	0.997998	0.999344	1.02735
168.117	0.833656	1.09098	0.960599	1.00351	1.031	1.00598
172.761	1.13058	0.916745	1.01805	1.00413	1.03288	0.96633
177.404	0.929985	0.969201	0.911453	1.00397	0.962467	0.992936
182.045	0.860648	0.926723	0.922516	0.971347	0.985148	1.01001
186.693	1.01017	0.982772	1.0697	1.00343	1.07929	1.01945
191.336	0.925839	0.94911	1.03943	1.0269	0.99302	0.978539
195.981	1.17516	1.03543	0.996955	0.970118	1.06739	0.961365
200.624	1.12085	1.16568	0.937935	0.956218	1.02761	0.957984
205.265	1.0168	0.909668	1.01658	0.983349	1.01349	0.942825
209.917	1.27582	0.998354	1.07209	1.01603	1.05031	0.971004
214.557	1.06022	1.11609	0.879937	1.00372	0.976057	0.892662
219.196	0.935054	1.01709	0.989183	0.977513	0.950291	1.06544
223.84	1.03675	0.970978	1.03454	1.02478	0.942862	0.970325
228.483	1.02685	0.822975	1.05676	1.02997	0.985079	0.989282
233.123	0.981413	0.997909	1.05446	1.00864	1.01922	0.992327
237.765	0.877822	0.982078	1.05042	1.01501	0.957204	1.02785
242.41	1.05892	0.922632	0.997687	1.01086	0.997401	1.00587
247.048	1.10128	1.25928	0.860098	1.00366	1.00106	0.941736
251.69	0.948399	0.870684	1.04065	1.05409	0.954649	0.987716
256.34	0.934219	0.972214	1.0437	1.01509	1.00306	1.01343
260.98	1.04171	1.04248	0.914457	0.988649	0.950366	1.00979
265.628	1.11354	0.95309	0.950699	1.00178	1.04938	0.973032
270.27	0.841883	1.20063	0.946598	0.966919	1.01153	1.00107
274.913	1.0183	1.18118	0.965957	0.969294	1.0003	0.93128
279.556	0.975599	0.88033	1.08039	0.980584	0.947795	1.0149
284.197	1.02121	0.859758	1.11248	1.01699	1.03236	0.976516
288.845	1.11111	0.933444	0.973907	0.9641	0.991651	1.04986
293.493	0.91879	0.983609	1.00692	1.02415	0.960017	0.979541
298.133	0.987751	1.23163	1.02469	1.00105	1.0424	1.04597
302.779	0.975294	0.883006	1.08305	1.02682	1.02189	1.00598
307.423	1.10433	0.865071	0.965104	1.00013	0.950633	0.942282
312.069	1.0022	0.998431	0.860098	0.981982	0.964754	0.97615
316.711	0.96022	1.0735	0.858074	1.02289	1.03481	1.02323
321.357	1.07233	0.936841	0.990213	1.01033	0.960793	0.986885
326.003	0.997834	1.14447	1.04346	1.0085	1.00097	1.0405
330.641	1.03471	0.895704	1.11816	0.977618	0.992509	0.975377
335.28	1.01721	0.978176	0.963395	0.954476	1.00715	1.01395
339.924	0.919725	1.06315	1.13381	0.974359	0.984371	1.0068
344.566	1.03325	1.08193	0.879561	1.03137	1.03116	1.06163
349.208	0.923462	0.921077	1.02744	1.02655	1.05664	0.99616
353.853	1.05527	1.03848	0.994299	1.0107	0.973335	0.951859
358.495	1.03902	0.891135	1.03675	0.987375	0.981755	0.990493
363.133	1.15023	0.849543	1.05183	0.996073	1.03709	1.01895
367.778	0.854672	0.902026	0.903234	1.01997	0.977921	1.01604
372.42	0.942237	1.13952	1.03592	0.957005	1.06135	1.04533
377.065	1.07743	1.03682	1.10731	1.00514	0.964787	1.01244
381.707	0.998924	1.12231	0.954913	1.029	0.921627	0.961025
386.349	0.827392	1.19747	1.06255	1.04138	0.964003	1.02742
390.995	0.938722	0.848339	1.09301	1.02859	1.01736	0.984886
395.641	0.919549	0.954059	0.950502	0.983365	1.03973	0.943231
400.281	1.1154	1.07937	0.973374	1.00906	1.06195	0.974697
404.929	0.914795	1.06801	0.958127	0.985253	0.936268	1.02428
409.572	1.04175	1.05604	0.86718	0.989354	0.980345	0.945854
414.215	1.09947	1.07183	0.999486	0.990957	1.00589	1.07896
418.859	0.859389	1.09858	0.975431	0.932272	1.0091	1.04294
423.504	1.11983	1.07505	0.937089	1.00875	1.01897	0.997616
428.143	1.0012	1.24497	1.20744	1.04668	0.997668	1.00332
432.783	1.10102	0.951687	0.903347	0.984971	0.987983	1.01356
437.43	0.8633	0.993826	0.969554	0.993611	0.971667	0.977312
442.079	0.940878	1.12872	0.947768	0.991535	0.954136	1.00324
446.72	1.11371	1.06247	1.11277	1.01947	0.974288	1.00577
451.361	0.92709	1.03116	1.01743	1.04871	0.930447	0.974324
456.009	1.02278	1.07084	1.01431	1.00291	0.997126	0.963945
460.654	1.08207	0.977802	1.01525	1.00724	1.00505	1.01052
500.654	1.07435	1.16439	0.840205	12.71	7.23436	13.7075
507.197	1.09228	1.15999	0.954086	14.4011	10.9094	19.5413
511.835	0.867083	0.934298	0.951021	17.1022	14.1905	23.3094
516.483	1.00829	1.11918	0.94221	19.7022	18.5299	26.845
521.124	1.01116	1.06889	0.892048	20.8312	20.3668	31.4599
525.767	0.951161	1.10332	1.03377	22.8825	24.534	33.0244
530.414	1.00632	1.00547	1.02421	24.8294	27.597	34.8126
535.062	0.876803	0.970841	1.06782	26.1724	29.2842	38.5106
539.702	0.936278	1.28294	0.996217	25.7625	32.8788	39.7259
544.342	1.06086	0.892076	0.933204	27.5913	35.4424	41.8376
548.993	1.1306	1.01631	1.12192	28.8768	38.2205	44.7481
553.638	0.982704	1.20992	1.06417	29.5897	39.278	46.1496
558.278	1.05966	1.14831	0.890609	29.3028	41.5168	47.2608
562.928	1.0403	1.02937	1.13523	29.7853	42.2865	47.3777
567.573	1.13164	0.9361	0.959377	31.3935	40.8855	48.4632
572.213	0.993676	1.00895	1.09147	30.7974	43.7538	51.256
576.855	0.828931	0.925232	0.998808	32.1188	44.9288	49.8454
581.498	1.0477	0.908417	0.931246	33.2755	45.403	51.5378
586.144	1.04112	0.94982	0.958054	32.9679	47.8869	51.4462
590.785	0.937761	0.981292	1.11473	33.2507	46.3195	52.1184
595.427	1.05614	0.988362	0.81143	33.1299	47.2533	50.0539
600.073	1.03332	0.865605	0.996916	33.7441	49.4235	53.2754
604.717	1.0116	1.06029	1.17227	34.8483	47.6116	55.3075
609.355	1.06225	0.871	1.11631	33.2212	48.7269	52.3559
614.003	0.894694	1.06255	0.954008	34.6556	50.1185	54.5502
618.649	1.06488	1.08441	1.14867	34.8775	45.251	54.6001
623.29	0.910066	1.05064	1.0959	34.0458	48.9915	53.461
627.932	1.02466	1.04807	0.868743	35.0323	49.7774	54.5863
632.586	0.965633	0.960126	0.983754	35.2436	50.3171	59.1494
637.234	1.07689	1.0651	1.03709	35.7289	50.8577	52.1909
641.874	0.935894	1.06882	1.07167	35.828	50.1674	52.5741
646.532	0.919688	0.849912	1.06484	36.4683	50.479	54.774
651.182	1.13179	1.21679	1.11648	35.1031	50.8372	57.6029
655.825	0.998024	1.25522	0.931462	35.3697	51.944	55.3259
660.467	0.994838	1.10368	1.07403	36.6684	49.8389	52.8936
665.116	0.899829	1.04152	1.0773	36.8045	50.2226	52.7328
669.759	0.80426	0.941354	0.905802	35.9236	50.3642	54.4497
674.404	1.01475	1.1246	1.07244	35.493	49.6527	53.7897
679.053	1.08577	1.01362	0.967525	36.2658	52.8758	54.9391
683.701	1.01916	1.08889	0.866391	36.2827	48.9935	55.1199
688.339	0.966807	0.836005	1.09962	35.1786	47.8811	54.0402
692.981	0.997118	0.870087	1.12092	36.6942	48.9929	51.1279
697.633	0.870827	0.977425	1.1162	36.6072	47.5842	51.1227
702.279	1.12921	0.919521	0.913424	37.185	49.5745	54.2567
706.922	0.920235	1.01507	0.959256	36.5248	50.3572	55.3516
711.568	1.17018	1.12453	1.03323	36.1255	51.1129	54.2073
716.214	1.17149	0.985443	0.91967	35.9265	50.6235	51.7567
720.852	0.909424	1.01226	1.04786	37.3597	50.2289	53.3456
725.498	1.02513	0.987842	1.09593	36.1397	48.9228	53.3737
730.149	0.986562	1.09672	0.951655	37.1826	47.0731	52.5082
734.796	0.929745	1.10357	1.12393	36.5386	51.1007	50.4389
739.438	0.946505	1.03457	1.03189	36.3366	48.7803	53.6565
744.089	0.911215	1.19156	0.91509	35.5183	50.855	52.4138
748.74	0.954442	1.03901	1.03503	36.004	48.7147	52.2424
753.382	0.82493	0.797681	0.942061	36.2168	47.462	51.4628
758.032	0.930563	0.906095	1.0905	35.5187	48.0576	50.684
762.683	1.0881	1.01304	1.13546	35.4603	49.8817	49.1643
767.333	0.999272	0.954525	1.03256	37.6625	49.2511	51.2178
771.973	0.997209	1.09568	0.919657	35.115	46.5549	53.0972
776.617	0.894557	1.10265	1.11276	35.3491	50.9106	51.5569
781.267	0.967102	1.11057	1.01466	36.1927	48.4911	54.343
785.907	0.900353	0.834358	0.922326	35.35	48.6941	51.8932
790.553	1.12992	1.2109	1.12363	35.8088	47.9908	52.2838
795.206	0.94516	1.13947	1.09181	35.8248	48.5166	50.613
799.852	1.10431	1.12527	1.0156	35.3997	46.7562	49.4733
804.492	0.969155	0.944891	1.12182	36.521	50.9602	48.901
809.14	0.914905	1.08223	0.983723	34.8043	47.7181	50.5634
813.794	0.919732	1.10276	1.17757	35.5132	44.2067	49.8248
818.434	1.07207	0.866259	0.893602	35.8887	48.156	50.5695
823.078	0.966228	1.2753	0.958583	35.6174	46.7677	53.9308
827.73	0.937387	1.06663	0.89057	35.0197	47.5331	52.3768
832.38	0.979779	0.987883	0.988537	35.3459	49.0748	51.7881
837.022	0.853124	1.09551	1.22128	36.023	49.2233	49.6092
841.666	0.903003	1.11057	0.946308	35.8301	45.1014	49.5603
846.31	1.05736	1.14085	1.00166	35.5526	44.3492	48.4939
850.952	0.880859	0.908403	0.83169	34.8242	46.4517	48.0344
855.594	0.909565	0.994188	1.2173	34.0894	46.8184	50.9144
860.236	1.00848	1.05577	1.02073	35.8455	46.8467	48.1779
864.88	1.01805	1.04004	1.04534	35.4295	46.0764	48.3515
869.519	1.06122	0.989551	0.965151	35.2702	48.4252	46.1539
874.16	1.02466	1.00365	1.13427	35.7718	45.3125	48.4769
878.806	1.05313	1.04877	1.08243	34.1105	48.7328	50.1081
883.444	1.13621	1.20118	1.17038	35.0642	46.2923	48.9933
888.086	1.03438	1.09486	0.925108	35.0599	46.8858	49.2773
892.726	0.898829	0.95075	1.07122	33.0652	45.6511	49.6266
897.368	1.05234	0.989453	0.948801	35.0093	48.2241	49.4884
902.006	1.09155	1.05044	0.875748	35.7239	46.9612	47.5816
906.643	1.09769	0.969783	0.924673	34.6954	44.1361	47.078
911.288	1.01395	1.15787	1.11125	34.55	46.1215	47.1667
915.928	1.11098	0.97156	0.970391	35.7803	47.4731	47.1552
920.568	0.87422	1.13394	1.05215	33.7807	45.5393	47.2931
925.214	1.02394	0.988824	0.869968	34.1132	46.232	48.9507
929.856	0.949344	0.989382	0.945076	35.3428	46.3054	45.747
934.496	0.926587	1.04798	0.986599	35.4451	46.7432	47.3724
939.138	1.00827	0.995324	0.90599	34.555	46.3943	48.5847
943.779	1.14678	1.177	0.965447	33.0605	46.8375	49.1561
948.418	1.10812	0.913516	0.914208	33.5728	45.5841	44.7722
953.059	0.857449	0.880998	1.05462	33.4748	44.9637	47.3948
957.696	1.04766	0.939994	1.1015	34.0098	46.158	46.2898
962.338	1.01601	1.11983	0.925934	33.4527	46.0158	45.8945
966.976	0.964256	1.10287	0.951383	34.0203	44.2138	49.0752
971.614	0.863154	0.951796	1.01172	33.7202	45.5236	48.0101
976.256	1.1457	0.983751	1.10077	34.4639	43.8533	44.7316
980.895	0.911861	0.983522	0.897867	33.871	48.8756	48.4146
985.535	1.10762	1.00089	1.03686	34.0774	44.5897	49.5481
990.174	0.895443	0.969593	0.93334	33.9469	43.7137	45.9102
994.82	0.975862	0.965215	0.881819	33.6736	43.6178	47.9849
999.465	1.08396	0.852399	1.00127	32.888	42.7205	46.657
1004.11	0.93928	1.17553	0.941881	33.8035	44.5409	45.7418
1008.75	1.00135	0.805673	1.07473	33.3586	41.8605	47.8533
1013.39	0.941579	1.07114	0.889043	33.6383	41.7189	44.8841
1018.03	1.02238	0.966602	1.09138	33.0675	42.6364	43.9378
1022.68	0.972403	0.997093	1.0267	34.0984	43.9758	46.3014
1027.32	1.20184	1.14589	1.24293	32.5131	47.7998	44.6993
1031.96	0.976838	1.22439	1.03036	32.8285	42.1236	48.1346
1036.6	0.958258	0.944812	1.03523	33.0131	41.3017	46.8186
1041.25	1.1127	1.14815	1.02115	33.3501	43.38	46.9521
1045.89	1.00628	0.909913	0.940607	33.5278	44.3123	47.5859
1050.53	0.97702	0.970641	1.13855	31.7598	44.7716	47.9863
1055.17	1.06804	1.09416	1.04878	32.0959	39.3619	46.5368
1059.81	1.05818	1.14169	1.01164	32.2194	40.7986	45.9281
1064.45	1.04693	0.865043	0.957006	32.4548	43.2996	46.9348
1069.09	1.00517	0.836149	1.04437	32.2827	42.871	47.3488
1073.73	0.958173	0.899259	1.12197	32.8991	43.8214	45.3856
1078.37	1.03716	0.852852	1.01341	32.3048	47.3641	46.8726
1083	0.957539	0.956979	1.02762	32.5164	42.284	46.0079
1087.64	0.926559	0.951705	1.13576	33.348	42.1081	45.9028
1092.29	0.936657	0.934309	0.998665	31.2276	44	46.6888
1096.93	0.948094	0.813681	1.03538	32.5756	43.3993	45.8936
1101.56	0.998491	1.13452	1.12115	32.4726	40.6103	47.2581
1106.21	1.00261	0.943499	1.08374	31.7148	41.0477	46.0858
1110.85	1.05238	0.749679	1.0876	31.2988	43.8742	46.1793
1115.49	1.01597	1.14799	1.0109	32.5189	42.8518	45.011
1120.13	0.939521	0.95065	0.961284	32.4219	41.8866	46.479
1124.78	1.13293	0.885235	1.07954	33.329	42.9549	47.5497
1129.42	1.07658	0.737386	0.976062	32.5264	43.8837	45.1255
1134.06	0.925251	0.789094	0.953269	31.6462	42.7937	48.1122
1138.7	0.933755	0.953986	1.06702	31.4099	43.7906	46.02
1143.35	0.965086	0.857984	0.996433	31.298	40.4274	46.4731
1147.98	0.950996	1.16468	1.15261	32.531	41.5366	47.2301
1152.63	1.01886	0.928782	1.16424	32.5503	40.358	46.8086
1157.27	0.914581	0.912251	1.11632	32.1386	42.4897	44.0921
1161.91	0.964277	0.913489	1.01225	31.0503	41.1119	45.512
1166.55	0.86651	0.956422	1.00181	30.9961	42.176	43.8192
1171.2	0.910812	1.02308	1.18237	30.5591	42.4006	43.8219
1175.84	1.07852	0.960133	1.00384	32.4126	40.1491	45.9595
1180.49	0.891263	1.07785	1.0746	31.6864	40.2518	43.0208
1185.13	1.28279	0.972603	1.01432	31.9995	40.8715	43.0431
1189.77	1.20204	0.917263	0.994934	32.699	42.5259	43.7541
1194.41	1.08312	0.957191	0.961761	31.5205	42.4483	45.978
1199.06	1.05135	0.802276	0.946298	31.8478	42.5986	44.9997
1203.7	1.01138	0.91655	0.969147	32.1205	39.9252	45.2733
1208.34	0.909416	1.07694	1.16044	32.1858	40.0728	44.8905
1212.98	1.03567	1.05207	1.10821	31.1626	39.7495	47.4165
1217.62	0.929258	0.989949	1.10933	30.8424	42.6456	44.3541
1222.26	0.902079	0.998567	1.0952	33.2564	41.29	42.9913
1226.9	0.994192	1.01319	1.19414	32.1928	39.7918	44.7646
1231.54	0.955845	0.814594	0.977194	30.5589	41.5443	44.5151
1236.19	0.854984	1.22364	0.959251	30.4559	42.0197	42.279
1240.83	0.975974	1.30627	1.13399	31.283	40.3898	45.1927
1245.47	1.01577	0.873643	0.905276	30.5848	42.7411	46.0655
1250.11	0.930997	1.03119	0.999267	30.7688	39.372	45.3755
1254.75	1.11174	0.928238	0.958678	31.1291	40.1697	43.5048
1259.4	0.918321	0.922461	1.01314	31.467	44.7764	43.7178
1264.04	0.927676	0.881408	1.02298	32.2187	42.0755	43.4028
1268.68	0.966799	0.935133	1.24575	31.4033	45.6565	45.2385
1273.33	1.0731	0.968268	1.08552	30.8366	40.5755	45.8314
1277.97	0.960671	0.950462	1.17099	31.2558	41.0371	46.0384
1282.61	0.914891	1.12058	0.934065	31.9005	40.426	41.7388
1287.25	1.00839	0.940844	1.09909	30.0114	42.4884	45.1815
1291.89	0.950405	1.05403	0.924723	30.0636	41.4231	46.3757
1296.53	1.14668	1.52281	1.11416	30.0542	39.6208	45.3212
1301.18	0.988658	0.773987	1.20505	31.3095	41.5915	44.3814
1305.82	1.02008	1.13068	0.909257	31.2764	39.9492	44.9907
1310.46	0.920131	0.856809	1.03011	31.4275	39.9222	45.1102
1315.1	0.968092	1.12892	0.997068	30.8563	40.9103	45.8384
1319.74	1.06261	1.07608	1.01226	30.1785	41.2093	44.3902
1324.38	0.989374	1.00796	0.853377	30.4278	41.7778	44.7882
1329.02	0.996142	0.938031	1.06847	31.2685	41.8744	44.704
1333.66	1.18422	1.1388	1.00561	30.6497	38.5018	47.4712
1338.31	1.03609	0.952962	0.981517	29.919	41.556	43.9192
1342.95	0.989301	0.994356	1.08809	30.3604	39.5562	44.4085
1347.6	0.862644	0.857151	0.954531	31.5443	39.9416	44.4263
1352.24	1.05593	1.05209	0.944141	30.2468	39.3029	44.1829
1356.88	1.00267	1.17897	1.09757	30.9646	40.9075	42.3126
1361.52	0.950949	1.03458	1.23652	31.2014	39.9271	44.4811
1366.17	1.07352	1.25795	0.972551	29.2623	42.6876	43.4994
1370.82	1.01661	1.05819	1.06242	30.0529	40.7077	44.3296
1375.45	1.09375	0.969283	1.08063	31.3365	38.8417	46.812
1380.1	1.05857	1.07154	0.892502	29.8133	40.5923	44.2766
1384.73	0.998783	0.891728	1.30624	31.5283	39.8221	43.8958
1389.37	1.12056	0.889992	1.05024	30.8694	38.4738	43.4917
1394.01	1.00527	0.913867	0.878812	30.8914	43.1864	42.941
1398.66	0.974485	1.0902	1.10761	31.0712	38.0827	46.5306
1403.35	0.9256	0.729919	0.978213	30.5721	43.2862	45.5478
1407.99	0.941291	0.942935	1.00378	30.0517	41.6302	46.3819
1412.63	0.978597	0.999396	1.01218	30.4923	41.2587	43.2523
1417.28	0.89077	1.00956	1.17282	29.9904	38.9262	44.4522
1421.92	0.99378	0.911092	1.14072	31.2078	41.1672	45.9751
1426.56	1.01973	0.714793	0.921134	30.0355	41.3944	42.3077

## Sheet: Panel d (miniGq barplot)
GLPLight1	GLP1R
0.991823	35.5335
1.01631	49.5862
1.03356	54.0968

## Sheet: Panel e (miniGi)
Time (sec)	GLPLight miniGi			GLP1R miniGi
0	1.03146	1.01104	0.997215	0.992919	1.00269	1.01161
5.59	1.00324	0.967083	0.986508	0.991348	0.998042	1.00392
10.233	1.02135	0.990804	0.990231	0.993145	1.0103	0.991439
14.872	1.02889	1.00516	0.995038	0.99683	1.01051	1.00117
19.513	1.0144	0.977134	0.991391	0.993274	1.01319	1.0088
24.154	0.989447	0.991216	1.0005	0.99439	0.997816	0.996228
28.799	1.00013	1.01515	0.989811	0.991627	1.009	1.00507
33.438	0.97544	0.983993	0.992395	0.999044	1.01101	1.00278
38.081	1.02221	1.01106	1.02376	0.987612	1.00633	1.01322
42.724	0.998509	1.01217	0.976833	0.985227	1.00615	1.00164
47.366	0.991464	0.97138	0.994997	0.993182	1.00105	1.00345
52.009	0.990017	0.953252	0.986891	1.0032	1.01335	1.00432
56.651	0.996661	1.01129	0.981186	0.987425	0.998859	1.00392
61.293	0.988619	0.997593	0.992959	0.989733	1.01269	1.00336
65.93	0.98396	0.945525	0.984201	1.00067	1.00597	1.00387
70.578	1.0084	0.957134	0.995131	1.0065	1.00473	1.00283
75.219	0.987658	1.02377	0.987079	0.999311	1.01964	1.01056
79.869	0.991255	0.995067	0.995514	1.00492	1.00055	0.998828
84.513	0.99134	0.971492	0.993497	0.999938	1.01329	0.995749
89.165	1.00754	0.992571	0.999182	1.00127	1.01253	1.00142
93.813	1.0028	0.987331	1.0076	1.00394	1.01437	0.995864
98.451	1.00519	1.01111	0.995436	0.995866	1.00848	0.996977
103.097	1.00961	0.987278	0.98677	1.00514	1.01398	1.00132
107.74	0.990163	0.980005	1.00033	0.999173	1.01964	1.00998
112.387	1.02555	1.00271	1.01321	0.99742	1.0272	1.01314
117.035	0.990144	0.98774	0.994925	1.0026	0.991059	1.01023
121.679	1.01136	1.00215	0.981911	0.998558	1.00802	0.995555
126.323	1.00589	0.994534	0.993878	0.998302	1.00901	1.00149
130.963	0.995438	1.01665	0.994739	1.00318	0.991195	1.00234
135.613	0.991852	1.00672	0.986875	0.999065	1.02319	1.00088
140.258	1.01328	1.02202	0.988991	0.991445	0.993099	1.0039
144.904	0.993402	1.02593	0.997946	0.997083	1.01674	1.01672
149.547	0.986815	1.00767	1.0097	0.997832	1.00824	0.993469
154.194	1.0033	1.00578	0.995753	1.00937	1.00408	0.998952
158.835	1.0076	1.00854	0.983222	1.0023	1.01379	1.0112
163.476	1.0067	0.974525	1.00109	1.00094	1.00086	1.01212
168.117	1.00845	0.968647	1.00492	1.01044	1.00371	1.00454
172.761	1.00644	0.998093	1.01871	0.999856	1.00292	1.00785
177.404	1.02049	0.994324	0.996801	1.00223	1.00976	0.995689
182.045	1.01116	0.959005	0.993105	1.0054	1.00909	0.999311
186.693	1.02289	0.995837	0.991808	1.0025	0.995346	0.998351
191.336	0.99099	1.0056	0.992629	1.01229	1.00098	1.00251
195.981	0.996407	0.973026	1.00688	0.99738	1.0047	1.00644
200.624	0.990264	0.98752	1.02145	0.994663	0.993288	1.00227
205.265	1.01884	1.00169	1.01974	1.00545	1.0079	1.00118
209.917	0.987429	1.01566	0.995226	0.993204	1.0084	0.999928
214.557	0.991122	1.01484	0.993683	1.01276	0.993696	0.990226
219.196	0.973241	0.973728	1.00327	1.00771	1.0101	0.995965
223.84	1.01211	1.00755	0.992284	1.00567	1.00108	0.998876
228.483	1.0168	0.999827	0.999097	1.00349	1.0111	1.00088
233.123	0.989632	0.973895	1.01439	1.00197	1.00047	0.999368
237.765	1.02547	1.01434	0.984242	1.00495	1.00622	1.00438
242.41	0.983737	0.980585	0.995833	1.00042	0.993325	0.998865
247.048	0.970116	1.03488	1.00634	0.996122	1.00182	0.995682
251.69	1.00507	1.00717	1.00416	1.00158	0.996528	1.00572
256.34	1.01209	1.00896	0.979927	0.994875	0.984694	1.00588
260.98	0.993806	1.01933	0.993978	1.00597	1.00478	0.998887
265.628	1.00374	0.99284	1.01082	0.995364	0.986593	1.00112
270.27	0.969877	0.984354	1.01605	1.00353	0.999426	1.00248
274.913	1.00882	0.994723	0.99315	1.00261	0.988214	1.001
279.556	0.992933	0.984488	0.982799	0.994957	0.989508	1.00625
284.197	0.967215	0.982584	1.00578	0.998153	1.00101	0.995527
288.845	0.991355	1.01154	1.00463	1.00358	0.9941	0.998005
293.493	1.00705	1.0448	1.01756	0.998355	0.979763	0.998188
298.133	0.994651	1.00468	1.01139	1.00497	0.993163	0.990742
302.779	1.0009	1.00521	0.989771	1.00221	0.995877	1.01345
307.423	0.997899	1.01076	1.00547	1.01266	0.998729	0.996861
312.069	0.966365	1.03743	0.994983	0.991168	0.993945	0.996092
316.711	1.0271	1.0111	1.00434	1.00761	0.989084	0.990107
321.357	0.992711	1.02538	1.01723	0.997041	1.00118	0.995998
326.003	0.975674	0.980667	1.00213	0.998331	0.988569	0.99608
330.641	0.98447	0.990456	0.996713	0.993969	0.988542	0.998472
335.28	1.00125	0.994206	1.01544	1.00326	0.99376	0.996814
339.924	1.00296	0.985378	0.982224	1.00304	1.00008	0.997436
344.566	0.984613	0.977929	1.0177	1.00455	1.00789	1.00459
349.208	1.007	1.02536	1.00076	0.998613	0.996864	1.00009
353.853	0.986526	1.02234	1.00578	1.00138	0.989246	1.00546
358.495	1.0094	1.00535	1.01819	1.00267	0.995428	0.996052
363.133	0.997069	1.01175	1.00773	1.00672	0.995746	1.00133
367.778	1.01048	0.997022	1.00965	1.0044	0.985096	0.992978
372.42	1.01048	1.03584	0.986357	0.999559	0.98913	0.986449
377.065	0.989305	1.01698	1.00899	1.00652	0.995466	0.993956
381.707	1.03718	1.01617	1.01073	0.993252	0.988799	0.998708
386.349	0.992061	1.04686	1.00294	0.995731	0.99948	0.984816
390.995	1.02695	0.999623	1.03105	1.00449	0.979855	0.998393
395.641	0.987635	0.987003	1.00361	0.98974	0.971092	0.985928
400.281	0.986504	1.01502	0.997179	0.992563	0.992331	0.997025
404.929	0.99278	0.976142	1.00163	0.995099	0.99712	0.994628
409.572	0.986452	0.992772	1.00695	0.997055	0.99325	0.998506
414.215	0.995005	1.02019	0.990407	1.00083	0.993983	0.985128
418.859	0.992014	1.00294	1.02279	1.0061	0.988312	1.0021
423.504	1.00774	1.02678	0.994719	0.997089	0.995265	0.988181
428.143	0.998866	1.02713	1.01056	0.998745	0.99477	0.991802
432.783	1.0109	0.961999	1.01669	1.00074	0.995207	0.999696
437.43	1.00009	1.02659	1.00384	1.00319	0.983441	0.985734
442.079	0.996172	0.975732	0.99597	1.00857	0.99657	0.995136
446.72	0.977812	1.00907	1.00772	1.00307	0.976245	0.990043
451.361	1.04257	1.04369	1.00022	1.00553	0.987322	0.997088
456.009	0.999898	0.988712	0.996414	0.997313	0.982153	1.01404
460.654	1.00188	1.02933	1.00576	1.00298	0.989798	0.996383
500.654	1.04088	1.20388	0.970982	1.28269	1.23935	1.26542
507.197	1.0805	1.13392	0.966649	1.26423	1.29242	1.28886
511.835	1.04162	1.1214	0.971888	1.26413	1.29729	1.30453
516.483	1.04468	1.14365	0.990093	1.26831	1.32052	1.3203
521.124	1.06093	1.10179	0.973743	1.26455	1.34443	1.32625
525.767	1.00434	1.05737	1.00188	1.2746	1.35506	1.33971
530.414	1.02411	1.04809	0.994771	1.27195	1.38694	1.33343
535.062	1.01144	1.05629	0.993583	1.27137	1.37998	1.32343
539.702	1.0293	0.995268	0.990862	1.28335	1.38865	1.33552
544.342	1.00422	0.995918	1.01015	1.27551	1.43793	1.34288
548.993	1.00204	1.01071	1.00041	1.27521	1.40324	1.32755
553.638	1.03826	0.992991	0.994149	1.2801	1.43353	1.33806
558.278	1.02242	1.02423	1.01374	1.2673	1.42958	1.33058
562.928	1.03054	1.00402	1.02606	1.26362	1.43802	1.32513
567.573	1.00898	1.00909	1.01359	1.27367	1.41865	1.33304
572.213	0.997245	0.988949	1.00233	1.26357	1.42704	1.32507
576.855	1.02246	1.00208	0.999402	1.25243	1.44094	1.33108
581.498	1.00421	0.986943	1.03811	1.2727	1.44239	1.34612
586.144	1.01723	0.966774	1.02491	1.27102	1.42257	1.3247
590.785	1.00986	0.982851	1.02527	1.27408	1.41714	1.33087
595.427	1.0175	0.978179	1.00637	1.27189	1.42917	1.32805
600.073	1.0084	1.01873	0.99609	1.25698	1.4045	1.32454
604.717	0.995428	1.05597	1.0153	1.261	1.42674	1.31269
609.355	1.00462	0.969847	1.00261	1.25965	1.41164	1.32086
614.003	1.02513	0.985262	1.00956	1.2543	1.43156	1.32226
618.649	1.00009	0.987408	1.0233	1.26068	1.41905	1.32487
623.29	1.00719	1.02361	1.02781	1.27239	1.43449	1.31047
627.932	0.991511	0.978794	1.01504	1.25503	1.42506	1.3035
632.586	0.988994	0.984863	1.00197	1.25313	1.41912	1.30412
637.234	1.01543	1.03749	1.00366	1.2664	1.39885	1.31074
641.874	0.995741	0.993126	1.0104	1.26119	1.42439	1.3017
646.532	1.01996	1.01469	1.03327	1.26733	1.41511	1.31267
651.182	0.971825	1.00226	1.00862	1.25531	1.425	1.30495
655.825	0.986936	0.998372	1.0183	1.25753	1.41449	1.30155
660.467	0.985646	1.04025	1.00814	1.26541	1.41918	1.29826
665.116	1.02533	0.979071	1.02075	1.2541	1.3958	1.30815
669.759	1.00634	0.996032	1.00888	1.25148	1.42059	1.31797
674.404	0.974977	1.03163	1.02171	1.24988	1.39645	1.30101
679.053	1.00561	1.02721	1.0106	1.25245	1.41209	1.28506
683.701	1.02155	0.955829	1.01297	1.24174	1.40767	1.28968
688.339	1.02072	1.01993	1.01733	1.2465	1.41277	1.30297
692.981	0.998048	1.0303	0.990298	1.24409	1.38038	1.28644
697.633	1.0095	0.997362	0.988468	1.23992	1.40092	1.29714
702.279	0.998382	1.02886	1.00695	1.25145	1.40592	1.28759
706.922	1.0005	0.997995	1.03039	1.24097	1.39678	1.29294
711.568	0.974035	1.03587	1.01219	1.24691	1.38922	1.29328
716.214	1.0127	1.0349	1.01114	1.2527	1.38851	1.2748
720.852	0.975111	1.0476	1.02803	1.24778	1.38972	1.29757
725.498	1.01205	1.00514	1.02957	1.25431	1.40867	1.30054
730.149	0.989525	1.01234	1.02763	1.24825	1.39914	1.30769
734.796	0.984371	0.984222	1.02325	1.2356	1.35802	1.28213
739.438	1.00793	1.02983	1.00992	1.25488	1.38647	1.28173
744.089	0.986456	0.992873	1.00669	1.23806	1.39303	1.28006
748.74	1.00553	1.04009	0.988754	1.25003	1.37085	1.28689
753.382	0.998122	1.02247	1.02206	1.24541	1.37506	1.27689
758.032	1.01613	0.99054	1.02719	1.23305	1.37913	1.2838
762.683	0.987677	0.987938	1.01052	1.23634	1.38255	1.26551
767.333	1.00235	1.00489	1.01885	1.23524	1.36604	1.27993
771.973	1.01253	1.02745	1.0017	1.23511	1.37462	1.27235
776.617	1.00982	0.97693	1.01677	1.2293	1.36473	1.28273
781.267	1.02009	1.00524	0.999686	1.23305	1.37542	1.28482
785.907	1.0025	1.00655	1.01292	1.22998	1.35783	1.29253
790.553	0.987347	1.00903	1.02521	1.24532	1.3663	1.27448
795.206	0.98971	1.03515	1.01466	1.23551	1.35969	1.27248
799.852	0.992693	1.02431	1.00708	1.23204	1.35936	1.27677
804.492	1.03553	1.00904	1.02597	1.23301	1.36266	1.2627
809.14	1.03635	1.01504	1.02378	1.22531	1.38061	1.26557
813.794	1.02222	1.02138	0.998803	1.22575	1.37171	1.26674
818.434	0.995991	0.999058	1.0277	1.23116	1.36862	1.27179
823.078	1.03983	1.02219	1.01133	1.22999	1.37333	1.27404
827.73	0.99127	1.02177	1.01365	1.21313	1.35651	1.27533
832.38	1.00363	1.03184	0.994085	1.21798	1.37628	1.27257
837.022	1.05933	1.04722	1.00666	1.2182	1.35622	1.25938
841.666	0.997167	1.04793	1.03392	1.22951	1.3562	1.27093
846.31	0.999035	1.02712	1.01105	1.22856	1.36387	1.26511
850.952	1.00453	0.991949	0.99507	1.22444	1.35684	1.26273
855.594	1.02046	1.00427	1.03361	1.22418	1.34343	1.26567
860.236	1.00018	1.00477	1.0079	1.22761	1.36681	1.26753
864.88	1.00384	1.00943	1.01206	1.22423	1.37071	1.2737
869.519	1.00362	1.03473	1.01273	1.21369	1.35525	1.27813
874.16	0.990054	0.980089	1.01739	1.21807	1.36979	1.26033
878.806	1.00703	1.02291	1.02151	1.22293	1.36775	1.27505
883.444	1.02589	0.969937	1.02627	1.2141	1.34617	1.25028
888.086	0.998625	1.02012	1.03215	1.22104	1.35187	1.25713
892.726	1.00008	1.02158	1.04733	1.22028	1.34832	1.25835
897.368	0.993227	0.982646	1.00969	1.2222	1.36915	1.2571
902.006	0.995316	1.02049	1.00578	1.21607	1.33714	1.26427
906.643	1.00785	1.05298	0.997874	1.21445	1.37262	1.2695
911.288	0.974899	1.01548	1.00968	1.23009	1.33749	1.24477
915.928	1.03147	1.01577	1.00383	1.22165	1.35399	1.26336
920.568	1.02323	0.981833	1.01373	1.22156	1.36335	1.26615
925.214	1.0281	1.00509	1.00727	1.22492	1.35962	1.25029
929.856	1.0032	1.01655	1.02236	1.19724	1.36099	1.26603
934.496	1.00617	0.992702	1.01944	1.21832	1.34527	1.27772
939.138	0.987852	1.02629	1.02114	1.21079	1.34646	1.27198
943.779	1.02171	1.01756	1.01744	1.22123	1.3563	1.26359
948.418	0.975139	0.977105	1.03062	1.19757	1.37293	1.2592
953.059	1.02846	0.974561	1.02714	1.20807	1.34106	1.27066
957.696	0.983846	1.02605	1.01029	1.2084	1.35302	1.26622
962.338	0.972114	0.987156	0.997796	1.19556	1.35169	1.26359
966.976	1.04091	1.0129	1.00934	1.2015	1.33085	1.24317
971.614	0.993007	0.997284	0.992793	1.20633	1.3342	1.27466
976.256	1.03541	0.98122	1.00692	1.20288	1.36399	1.26745
980.895	0.97887	1.00953	1.01292	1.20015	1.34494	1.26831
985.535	1.01856	1.04111	1.00353	1.20045	1.33321	1.27015
990.174	1.01171	1.05161	1.01433	1.20924	1.3477	1.25187
994.82	1.00709	1.00938	1.00622	1.19412	1.33002	1.24796
999.465	1.01919	0.994373	1.01305	1.19497	1.31587	1.24584
1004.11	1.01781	1.05577	1.01602	1.21057	1.32969	1.25029
1008.75	1.02043	1.0022	0.978591	1.20419	1.3288	1.25403
1013.39	1.02252	1.02147	1.00351	1.2132	1.32664	1.25855
1018.03	1.00474	1.00506	1.00803	1.2066	1.34423	1.24222
1022.68	0.993869	1.02521	1.01081	1.2027	1.32019	1.24781
1027.32	1.02155	1.0068	1.01703	1.20814	1.32348	1.24582
1031.96	1.00065	1.0212	1.01942	1.20014	1.3393	1.2588
1036.6	0.990082	1.03292	1.01245	1.18971	1.34534	1.26605
1041.25	1.0042	1.00944	1.02066	1.20496	1.32126	1.26112
1045.89	1.00362	0.996766	1.02936	1.19655	1.34448	1.26014
1050.53	1.00614	1.0206	1.0017	1.20443	1.31978	1.2599
1055.17	0.983308	1.03933	1.02404	1.20022	1.33	1.25932
1059.81	1.015	0.979331	1.01098	1.19472	1.35173	1.25174
1064.45	1.02202	1.00886	1.02841	1.19981	1.33184	1.2553
1069.09	1.00917	0.997672	1.0028	1.20726	1.35629	1.26734
1073.73	1.02995	1.00052	1.03482	1.20396	1.32577	1.25971
1078.37	1.00207	0.996667	1.0325	1.18392	1.34475	1.25011
1083	1.01638	1.0248	1.00816	1.18927	1.34364	1.24465
1087.64	1.01624	1.02069	1.00481	1.19417	1.3261	1.2565
1092.29	0.990961	0.96649	1.03545	1.19463	1.32902	1.25864
1096.93	1.00545	0.989672	1.02526	1.19735	1.34426	1.25559
1101.56	1.01378	1.04604	1.01475	1.19075	1.33189	1.25345
1106.21	1.00018	0.997384	1.02801	1.19571	1.32456	1.25284
1110.85	0.999939	0.967123	1.00862	1.18529	1.36705	1.27374
1115.49	1.0094	0.979222	1.02973	1.18632	1.33682	1.25155
1120.13	1.01282	1.01988	1.01659	1.18762	1.3292	1.24962
1124.78	0.994918	0.958759	1.003	1.19389	1.3312	1.26333
1129.42	1.00078	1.00045	1.01534	1.20216	1.31363	1.25056
1134.06	1.02984	1.0058	1.01	1.18974	1.353	1.26308
1138.7	0.999159	1.00238	1.0095	1.17824	1.34397	1.24442
1143.35	1.02828	1.08286	1.01969	1.20504	1.33659	1.27045
1147.98	1.01539	1.00281	1.01716	1.20245	1.32662	1.25307
1152.63	0.99129	1.05216	1.01315	1.18413	1.30883	1.2513
1157.27	0.997193	1.03495	1.00933	1.17156	1.31424	1.25476
1161.91	1.00859	1.06815	1.02589	1.19403	1.33709	1.2487
1166.55	1.01488	1.03573	0.992641	1.19531	1.32081	1.2612
1171.2	0.989975	1.04801	1.01838	1.20233	1.3364	1.25281
1175.84	0.980437	1.0187	1.0056	1.18871	1.31399	1.25813
1180.49	1.01868	1.01555	1.02476	1.18688	1.32909	1.25319
1185.13	1.02128	1.0148	1.04305	1.18899	1.33553	1.23651
1189.77	1.00053	0.981479	1.00258	1.19541	1.33776	1.26324
1194.41	0.987152	1.02619	1.03054	1.19776	1.32566	1.26081
1199.06	1.0289	1.00192	1.01092	1.17911	1.31555	1.25138
1203.7	1.00107	1.03621	1.02017	1.1838	1.33213	1.26956
1208.34	1.00211	1.01295	1.01833	1.18777	1.33826	1.25751
1212.98	1.01559	1.02652	1.00709	1.18912	1.36004	1.2759
1217.62	0.996995	1.0038	1.01673	1.2017	1.31871	1.2574
1222.26	0.999165	0.993038	1.01366	1.20158	1.33351	1.25895
1226.9	0.98871	1.04425	1.00155	1.18337	1.34389	1.24037
1231.54	0.991327	1.03052	1.02642	1.19473	1.34946	1.25614
1236.19	1.00483	0.991561	1.0364	1.18457	1.34896	1.26258
1240.83	0.97269	1.07497	1.01811	1.19555	1.34306	1.25314
1245.47	1.02993	1.01141	1.03935	1.17572	1.33353	1.268
1250.11	1.01204	1.0035	0.996981	1.19458	1.32446	1.25746
1254.75	1.02426	0.978767	1.01935	1.19139	1.34389	1.26051
1259.4	1.01589	0.990605	1.00213	1.19642	1.33851	1.25962
1264.04	1.01511	1.01835	1.01897	1.18688	1.34281	1.25185
1268.68	1.0188	1.0742	1.03493	1.18342	1.32416	1.24783
1273.33	1.01679	0.998881	1.024	1.18754	1.32001	1.26823
1277.97	0.984514	1.00646	1.00345	1.18172	1.34827	1.25566
1282.61	1.02988	1.06273	1.02765	1.19039	1.34895	1.2675
1287.25	1.00748	0.991613	1.03362	1.18526	1.3358	1.26028
1291.89	1.04442	1.03472	1.0257	1.176	1.31434	1.2713
1296.53	1.01964	1.0165	1.0386	1.20511	1.31298	1.23846
1301.18	0.999231	0.991597	1.01846	1.17606	1.3405	1.24458
1305.82	1.02642	0.987036	1.01693	1.19272	1.33806	1.24497
1310.46	1.02346	1.01247	1.00027	1.1866	1.3234	1.27425
1315.1	1.00911	1.02497	1.02545	1.18006	1.30742	1.27638
1319.74	1.00926	0.9917	1.00806	1.17446	1.34399	1.25627
1324.38	1.01715	1.06533	1.02074	1.1825	1.34759	1.27948
1329.02	0.999771	1.05878	1.01953	1.18329	1.3526	1.2671
1333.66	0.992083	1.01001	1.01926	1.19062	1.35268	1.24832
1338.31	0.995742	1.05328	1.05163	1.18942	1.35091	1.25536
1342.95	1.01069	1.01473	1.00652	1.19939	1.34236	1.28191
1347.6	0.990992	1.00756	1.01325	1.19238	1.34815	1.2637
1352.24	1.02932	1.03718	1.01826	1.18867	1.31568	1.24692
1356.88	1.01227	1.03849	1.02267	1.18968	1.33658	1.2611
1361.52	1.01381	1.06514	1.02393	1.19041	1.32866	1.25771
1366.17	1.0357	1.03569	1.02715	1.18057	1.3416	1.27833
1370.82	1.02893	1.01633	1.03461	1.19533	1.32688	1.28053
1375.45	1.03127	0.967395	1.0189	1.18644	1.35562	1.27792
1380.1	0.999924	1.00484	1.02873	1.18475	1.3268	1.26879
1384.73	1.00253	1.0204	1.02202	1.19538	1.31845	1.26826
1389.37	1.01107	1.05838	1.00976	1.18413	1.33092	1.26024
1394.01	1.01052	0.981983	1.01921	1.19062	1.33518	1.26965
1398.66	0.982045	1.0377	1.00349	1.18967	1.31777	1.25325
1403.35	0.993029	1.01043	1.03162	1.19035	1.3201	1.25842
1407.99	1.02751	0.99872	1.03027	1.18824	1.33108	1.25915
1412.63	1.01239	1.07312	1.0126	1.19372	1.3264	1.26934
1417.28	1.00303	1.00135	1.00578	1.17789	1.32381	1.26663
1421.92	0.997585	1.00019	1.02221	1.18272	1.3435	1.25415
1426.56	1.02665	1.02009	1.0362	1.18581	1.30859	1.2729

## Sheet: Panel f (miniGi barplot)
GLPLight1	GLP1R
1.00249	1.25556
1.00682	1.41312
1.01096	1.30562

## Sheet: Panel g (miniG12)
Time (sec)	GLPLight miniG12			GLP1R miniG12
0	0.948281	0.985844	1.00303	0.997255	1.01573	1.00628
5.59	0.968296	0.960377	0.968042	1.00401	0.998913	1.00822
10.233	0.972269	0.969855	0.989549	1.00489	0.986452	0.996608
14.872	0.967498	0.966784	1.00372	0.995483	1.01218	1.01056
19.513	0.946082	0.989494	1.00966	1.00622	1.00311	1.01491
24.154	0.966713	0.972245	0.979156	0.991447	1.00887	1.0054
28.799	0.967146	0.980534	0.990346	1.00546	0.995919	1.00813
33.438	0.9682	1.02717	1.00769	0.996685	0.997742	0.997712
38.081	0.962692	0.965241	0.966049	0.991071	0.999908	0.989006
42.724	0.998349	0.999508	0.975768	0.997352	0.983775	1.01133
47.366	1.00829	1.01882	0.981597	1.00907	0.996676	1.01096
52.009	0.98657	0.986107	0.997278	1.00508	0.990585	0.997726
56.651	0.979644	0.993659	1.00069	1.0037	0.991693	1.01113
61.293	0.989735	0.996146	0.992692	0.985057	1.00368	1.00286
65.93	0.990393	0.989101	0.969659	0.993732	1.01054	1.01525
70.578	1.00741	0.993976	0.988279	1.00461	1.00985	1.01424
75.219	1.00764	1.05856	0.996118	1.00547	0.999247	1.00219
79.869	1.0145	0.97207	0.995482	1.00078	0.993268	1.00715
84.513	1.01256	0.989347	1.02613	1.01422	1.00838	1.01787
89.165	1.00354	1.00885	1.00921	0.995417	1.00776	1.01414
93.813	0.997669	1.00661	1.02716	1.01007	0.999447	1.01466
98.451	0.993264	1.02002	0.998131	1.00064	0.985081	1.01615
103.097	1.02537	0.997457	0.983037	1.0089	1.0065	1.01848
107.74	0.980669	0.991649	0.981338	1.00625	0.99862	1.00711
112.387	1.00565	0.98251	1.02889	0.997445	1.00181	1.00597
117.035	1.00346	1.01002	0.983696	0.999828	1.00042	1.00372
121.679	0.993978	1.01996	1.00876	0.997192	0.999934	0.995753
126.323	0.994254	1.0298	1.00219	1.00155	0.997338	1.0077
130.963	0.985085	1.00314	0.995887	1.00155	1.01375	1.01998
135.613	0.987691	1.00714	1.00264	1.00712	1.01001	1.01358
140.258	0.980192	1.04509	0.999058	1.00683	1.01143	0.984806
144.904	0.998132	1.00963	0.985428	1.00062	1.00271	1.00763
149.547	0.999034	1.04489	1.02561	0.99474	0.997568	1.0156
154.194	1.00618	1.007	0.986142	0.996289	1.01134	0.994876
158.835	1.0184	0.994066	0.989181	1.00164	1.01056	1.01194
163.476	0.991176	1.05405	0.983571	1.00227	0.992745	0.989874
168.117	1.01168	1.01217	1.01398	1.00098	0.993965	0.994917
172.761	1.00238	1.00045	0.993039	0.999667	0.997317	1.00401
177.404	1.00128	0.970236	0.959262	1.00098	0.999727	1.00679
182.045	1.00879	0.954811	0.994485	1.01009	0.9711	1.00717
186.693	0.992558	1.0079	0.979271	1.00748	0.993611	0.996046
191.336	1.01194	0.99526	0.977442	0.991918	0.999301	1.00753
195.981	1.00156	0.934415	0.986613	1.00378	1.01258	0.998787
200.624	1.00779	0.974703	1.00301	0.99516	1.01144	1.00555
205.265	0.95888	0.98122	1.0154	0.997587	0.972969	1.01139
209.917	1.00715	0.999257	1.00922	0.998527	0.99983	1.00069
214.557	1.00857	0.981663	1.00742	0.989654	0.992537	0.986965
219.196	0.999428	0.986059	1.02141	1.01499	0.9804	1.00239
223.84	1.00918	0.969578	1.02647	0.994451	0.982185	1.0075
228.483	0.999777	1.02524	0.988538	1.00252	0.996268	1.00743
233.123	0.993513	0.992867	1.02429	0.984458	1.00476	1.00047
237.765	1.0087	0.998052	0.98273	0.985165	1.00392	0.9966
242.41	1.02992	0.994612	1.00247	1.00198	0.984317	1.00794
247.048	1.03171	0.991422	0.99934	0.9994	1.00006	1.01203
251.69	0.973871	1.01926	1.03828	0.986664	0.985501	0.989845
256.34	0.997929	1.04686	1.00139	0.9947	1.01247	1.00398
260.98	0.999022	1.01589	1.01785	0.985463	0.998787	1.01094
265.628	0.996918	0.964828	0.998138	1.0057	1.01062	0.986198
270.27	1.00962	0.975214	0.977539	0.999706	0.989794	1.00141
274.913	1.04645	1.04288	0.978206	1.00377	0.994142	1.00638
279.556	1.0093	1.01076	0.994077	1.00542	0.985168	1.02199
284.197	0.991317	0.996702	1.02727	0.993672	0.988886	0.994779
288.845	0.983225	0.990794	0.995743	1.00457	1.02486	1.00538
293.493	1.00911	1.04345	1.01791	0.994145	1.00568	1.01083
298.133	1.01655	1.01411	0.986661	1.00375	1.00285	0.991438
302.779	1.00797	0.958615	1.01801	1.00114	0.97872	1.0019
307.423	0.989771	0.979079	1.00236	1.00073	1.00212	0.990133
312.069	1.04053	0.988309	0.979862	0.996337	1.00585	0.999936
316.711	0.997062	1.024	1.03001	0.999641	1.00661	0.990229
321.357	1.00888	1.00971	1.00966	1.00178	0.991038	1.0047
326.003	1.005	1.03485	0.988773	0.998889	0.988136	1.00202
330.641	1.00442	1.03417	1.0142	1.00253	0.99941	0.9954
335.28	1.00485	0.993893	1.00899	1.00184	0.981127	1.0033
339.924	1.00726	1.01699	1.00862	0.997506	1.00476	0.995951
344.566	1.01243	1.00439	0.988084	0.998065	1.00051	0.991454
349.208	1.00089	0.974198	0.977154	1.01136	0.995529	0.996203
353.853	1.03469	0.955151	1.03644	0.991839	0.980016	0.98275
358.495	1.0106	1.02086	1.02091	1.00831	1.0108	0.988189
363.133	1.00736	1.01288	0.997901	1.01433	1.0207	0.991128
367.778	0.999521	0.991495	1.00592	0.994789	0.993226	0.998344
372.42	0.981475	1.02095	0.981424	0.991395	1.00151	0.992716
377.065	1.00622	0.987496	0.996419	0.994761	1.00892	0.989263
381.707	1.00118	1.0198	1.02125	1.00396	1.02856	0.986538
386.349	1.02684	0.99715	1.00064	1.00379	1.00143	0.982181
390.995	1.01293	0.994584	0.987913	0.991404	0.997409	0.99196
395.641	0.994956	1.0353	1.00771	0.990436	1.00713	1.00026
400.281	1.0157	0.988895	0.997978	1.01179	1.01627	0.979025
404.929	1.04412	0.996753	1.02401	0.996602	0.987675	0.997685
409.572	0.991135	0.986161	1.00064	1.00562	1.00555	0.992806
414.215	0.990308	0.969019	1.03237	1.00185	0.998689	0.987846
418.859	1.01552	0.967242	1.01011	1.00201	1.01677	0.973938
423.504	1.01267	0.982714	1.01824	1.0014	0.987263	0.978275
428.143	1.0162	1.0085	0.990683	1.00082	1.00351	0.98939
432.783	0.994129	1.02469	0.999075	1.00312	1.02487	0.991114
437.43	1.00859	1.00899	1.00426	1.00331	0.995463	0.980277
442.079	0.975592	1.01587	0.97662	0.99102	0.986094	0.992761
446.72	0.990593	1.03746	1.01192	1.00196	1.02151	0.980811
451.361	0.993932	1.02247	0.989125	1.00115	1.00423	0.990673
456.009	1.02161	0.987407	0.998647	1.00395	0.9894	0.993579
460.654	1.03092	1.00285	1.01578	0.984295	1.00671	0.970408
500.654	1.06172	1.25869	0.992789	1.15053	1.01016	1.06585
507.197	1.07661	1.21278	1.06116	1.12127	1.04053	1.08573
511.835	1.02535	1.16899	1.02579	1.09472	1.03067	1.06534
516.483	1.06674	1.131	1.01693	1.07856	1.01646	1.08413
521.124	1.03725	1.10121	1.01615	1.08543	1.04025	1.0814
525.767	0.987686	1.0856	1.0086	1.0797	1.01588	1.07405
530.414	1.02726	1.07549	1.00758	1.07912	1.02804	1.08938
535.062	0.996842	1.06797	1.00696	1.07355	1.02371	1.09062
539.702	1.02234	1.02375	0.999371	1.05946	1.03956	1.10641
544.342	1.03016	1.03421	1.04683	1.06875	1.04262	1.10676
548.993	1.0238	1.06659	1.03473	1.0506	1.05039	1.08261
553.638	1.00038	0.97796	1.03118	1.05506	1.08057	1.06734
558.278	1.03232	1.01834	1.04799	1.06918	1.05263	1.10075
562.928	1.00958	1.02012	1.00264	1.0513	1.06239	1.0746
567.573	1.01545	1.03609	1.04452	1.04253	1.07118	1.10205
572.213	0.984794	0.988965	1.022	1.05295	1.06341	1.09235
576.855	1.046	0.98453	1.02376	1.04604	1.06582	1.08363
581.498	1.02805	1.02369	1.04648	1.046	1.06892	1.08488
586.144	1.01243	1.03627	1.0616	1.04184	1.06786	1.09135
590.785	1.00847	1.01551	1.04396	1.04	1.09065	1.08765
595.427	1.00648	0.993053	1.05717	1.03003	1.09906	1.09807
600.073	0.997133	1.02171	1.05428	1.04411	1.08657	1.07278
604.717	0.999476	1.01692	1.03918	1.04617	1.07483	1.09792
609.355	1.02663	1.04101	1.00337	1.0367	1.08603	1.08213
614.003	0.998658	1.03545	1.03196	1.03553	1.09069	1.10031
618.649	1.02091	1.00459	1.04335	1.03501	1.07175	1.07576
623.29	1.02079	0.995933	1.02128	1.04646	1.08531	1.08958
627.932	1.03622	1.04411	1.04292	1.05135	1.08826	1.0917
632.586	1.00003	1.00352	1.03899	1.03605	1.09082	1.07472
637.234	0.985204	1.00291	1.0266	1.04955	1.10438	1.1002
641.874	1.01154	0.984198	1.04032	1.03613	1.0802	1.08919
646.532	1.00628	1.00848	1.06242	1.0369	1.08125	1.0754
651.182	1.01961	1.06728	1.03109	1.03478	1.07983	1.0661
655.825	1.00938	1.01581	1.05077	1.03962	1.09134	1.08409
660.467	1.00981	1.02433	1.0569	1.02778	1.0754	1.07814
665.116	1.02449	1.01584	1.04203	1.03558	1.09957	1.07393
669.759	1.04818	1.03766	1.05031	1.03251	1.09506	1.081
674.404	0.9923	1.0445	1.0555	1.03887	1.07868	1.06913
679.053	0.997085	0.984654	1.05395	1.04009	1.08574	1.08152
683.701	0.99143	1.06074	1.04525	1.04253	1.08484	1.05793
688.339	1.02131	1.0134	1.04962	1.0358	1.09206	1.07724
692.981	1.00906	1.01142	1.01961	1.04722	1.103	1.06575
697.633	1.03011	0.952158	1.03218	1.03274	1.07944	1.06726
702.279	1.02896	1.0329	1.02743	1.04943	1.09439	1.06861
706.922	0.986368	0.966411	1.0758	1.03396	1.08813	1.08632
711.568	1.01099	0.970985	1.04288	1.02565	1.11223	1.0863
716.214	0.983065	0.991694	1.04309	1.02363	1.10123	1.05772
720.852	1.02457	1.01693	1.05129	1.05411	1.11292	1.05818
725.498	1.01087	1.0155	1.03635	1.02495	1.09398	1.06498
730.149	1.01716	1.02848	1.04873	1.05807	1.10513	1.06416
734.796	0.990472	1.03594	1.06476	1.03825	1.10103	1.06708
739.438	1.01793	0.995836	1.02134	1.04931	1.09437	1.05232
744.089	1.01081	1.0134	1.04217	1.02724	1.09693	1.06135
748.74	0.999431	1.01972	1.04205	1.02436	1.09581	1.06859
753.382	0.996325	1.0028	1.04376	1.03339	1.09356	1.06001
758.032	0.987587	1.06854	1.02905	1.04308	1.08122	1.05952
762.683	1.0196	0.98495	1.04461	1.05491	1.09385	1.04755
767.333	1.01857	1.00376	1.0548	1.03724	1.08656	1.05154
771.973	1.00174	1.03973	1.07148	1.05171	1.11939	1.05141
776.617	0.99887	1.04729	1.0607	1.04929	1.07343	1.06385
781.267	1.02534	1.04261	1.06837	1.02469	1.12636	1.06208
785.907	0.996207	1.01212	1.03747	1.04518	1.11722	1.049
790.553	1.0063	0.988011	1.02016	1.03571	1.09449	1.05652
795.206	1.02191	1.0212	1.03988	1.04168	1.11057	1.05096
799.852	1.01368	1.05865	1.01068	1.04311	1.09461	1.04373
804.492	0.969641	1.00903	1.01737	1.03717	1.07814	1.04922
809.14	1.00877	1.03567	1.03828	1.04375	1.11399	1.05107
813.794	1.01284	1.00018	1.028	1.03242	1.07692	1.03981
818.434	1.01976	1.01737	1.03069	1.03014	1.11109	1.0649
823.078	1.02002	1.02338	1.04037	1.03621	1.07376	1.02627
827.73	1.01679	1.03584	1.03752	1.02995	1.10778	1.02684
832.38	1.04642	0.950115	1.03471	1.0302	1.09236	1.02057
837.022	1.00402	1.02505	1.04315	1.03199	1.0875	1.0494
841.666	1.0311	1.03834	1.02482	1.03249	1.09188	1.02318
846.31	1.00673	0.993303	1.03195	1.02771	1.11691	1.05534
850.952	0.988214	1.04893	1.02217	1.03587	1.09082	1.02854
855.594	0.989252	0.978807	1.04561	1.04841	1.09236	1.02461
860.236	0.998791	1.00092	1.05611	1.02769	1.09249	1.02686
864.88	1.03589	1.02431	1.03427	1.02424	1.09768	1.0336
869.519	1.01417	1.05551	1.05524	1.03677	1.12661	1.03502
874.16	1.00205	0.990432	1.02855	1.02248	1.08674	1.02487
878.806	1.01768	1.04489	1.01675	1.01054	1.11064	1.01978
883.444	0.986015	1.02184	1.04126	1.02941	1.06823	1.0392
888.086	0.992302	0.997702	1.07546	1.02899	1.08631	1.03999
892.726	1.02562	0.968975	1.04089	1.0418	1.09229	1.03817
897.368	0.998745	1.00221	1.04629	1.01469	1.08399	1.04328
902.006	1.02579	1.0541	1.07256	1.02966	1.0966	1.02494
906.643	1.00561	1.0433	1.0448	1.02844	1.07027	1.0119
911.288	1.01168	1.0014	1.06133	1.03052	1.10517	1.00138
915.928	0.992912	1.00046	1.02483	1.03402	1.06361	1.01715
920.568	0.992629	1.05442	1.05688	1.01868	1.09941	1.01169
925.214	0.988402	1.02079	1.082	1.02452	1.07955	1.01232
929.856	0.987163	0.996664	1.03864	1.02142	1.07658	1.00725
934.496	1.00824	1.00993	1.04305	1.03755	1.12415	1.03136
939.138	1.02844	1.03622	1.07191	1.02591	1.10082	1.02622
943.779	1.0217	1.05792	1.05526	1.02369	1.07736	1.00067
948.418	1.00546	1.09034	1.06327	1.02291	1.08532	1.023
953.059	1.01428	1.03101	1.04228	1.01453	1.10279	1.01722
957.696	1.03438	0.994277	1.07686	1.03339	1.08815	1.01453
962.338	1.04434	0.992329	1.05213	1.03162	1.07686	1.00353
966.976	1.03088	1.00054	1.03189	1.02388	1.07048	0.997291
971.614	1.0185	1.03034	1.08193	1.04818	1.04287	1.00645
976.256	0.979729	0.982228	1.05232	1.01217	1.07579	1.01297
980.895	1.03851	1.02286	1.06237	1.0277	1.0817	1.00968
985.535	1.01133	1.03034	1.00688	1.00596	1.10318	1.0093
990.174	1.03145	0.992509	1.06273	1.01281	1.08249	0.982983
994.82	1.00474	1.05651	1.03561	1.02156	1.07523	1.00108
999.465	0.96024	1.01121	1.03953	1.02239	1.07826	1.00441
1004.11	1.00564	0.999873	1.02467	1.01837	1.05759	1.00702
1008.75	1.01364	1.00901	1.10077	1.02001	1.06831	0.9829
1013.39	0.998524	1.09551	1.0881	1.01646	1.08093	1.00415
1018.03	0.988995	1.02503	1.02876	1.02306	1.06538	1.01244
1022.68	1.0173	1.00505	1.07799	1.01959	1.06278	1.02171
1027.32	1.02486	1.11311	1.05476	1.02199	1.06355	1.00317
1031.96	1.02426	1.04225	1.04232	1.01876	1.09958	1.00066
1036.6	1.01333	1.02847	1.04748	1.01301	1.06073	1.00013
1041.25	1.04461	0.996589	1.08712	1.02596	1.10596	0.993438
1045.89	0.980594	0.980632	1.04434	1.02756	1.07999	0.990956
1050.53	0.994567	0.98178	1.05063	1.02088	1.08136	1.00227
1055.17	1.00969	0.995565	1.05453	0.99852	1.09421	0.981219
1059.81	1.01404	1.04603	1.05826	1.01593	1.0483	0.986322
1064.45	1.01258	1.05234	1.03398	1.01041	1.06572	0.992299
1069.09	0.9784	1.01269	1.04704	1.01878	1.08197	0.993589
1073.73	1.00588	1.04051	1.02895	1.003	1.07967	0.99595
1078.37	1.00871	1.09403	1.05758	0.999926	1.08471	0.993055
1083	0.974813	1.03619	1.06489	1.02743	1.09054	0.987704
1087.64	1.01561	0.976206	1.06064	1.0118	1.09301	0.996419
1092.29	0.99577	1.01084	1.0653	1.01703	1.08587	1.0022
1096.93	0.996294	1.04022	1.05187	1.02302	1.06232	0.992113
1101.56	0.976552	1.04316	1.03433	1.00551	1.06	0.981461
1106.21	1.026	1.01676	1.04786	1.00593	1.06797	0.995685
1110.85	1.05833	0.983649	1.029	1.02781	1.07601	0.992973
1115.49	1.0124	1.07653	1.04663	1.01576	1.05758	0.980314
1120.13	0.99515	1.00524	1.06816	1.02162	1.05423	0.975879
1124.78	0.978963	1.03267	1.03832	1.00466	1.05772	0.98244
1129.42	1.03812	1.01201	1.07677	1.01543	1.04931	0.993753
1134.06	1.02777	0.996752	1.04251	1.00831	1.03799	0.977264
1138.7	1.01763	1.01256	1.05683	0.997926	1.06276	0.984542
1143.35	0.985392	1.01766	1.06441	0.99659	1.06628	0.992162
1147.98	1.02789	1.02689	1.03658	0.993727	1.04323	0.98812
1152.63	0.993065	1.02033	1.02938	1.00425	1.06463	0.970506
1157.27	1.00446	1.05063	1.04501	1.00846	1.05626	0.982069
1161.91	0.995597	1.00646	1.0249	1.0036	1.07074	0.991723
1166.55	1.03585	1.03003	1.06356	1.01911	1.07191	0.964937
1171.2	0.993934	1.07446	1.03602	1.01544	1.07096	0.98132
1175.84	0.997919	0.994142	1.05299	1.00153	1.05203	0.957453
1180.49	1.01191	1.02422	1.07503	0.990078	1.05372	0.97393
1185.13	1.04168	1.0101	1.0202	1.01302	1.04808	0.964946
1189.77	1.0297	0.997903	1.06214	1.01344	1.0651	0.996913
1194.41	1.01398	1.08643	1.03779	0.994344	1.04972	0.990433
1199.06	1.0135	1.01324	1.07466	1.0061	1.03292	0.971385
1203.7	0.977318	1.05078	1.02048	1.01827	1.03297	0.971842
1208.34	1.04161	1.01549	1.04098	1.00538	1.03865	0.975806
1212.98	1.02245	0.967188	1.03189	1.01081	1.02992	0.98159
1217.62	0.991888	1.02885	1.0247	0.989913	1.05831	0.979893
1222.26	0.989198	1.0975	1.06217	0.996198	1.04492	0.985407
1226.9	0.983235	1.03483	1.05673	0.997564	1.05284	0.981423
1231.54	1.04588	1.01615	1.02802	0.99524	1.05085	0.974694
1236.19	1.0169	1.02761	1.04576	1.01697	1.05583	0.98204
1240.83	1.00166	1.02891	1.01873	0.996488	1.04857	0.9803
1245.47	1.01074	1.0221	1.06222	1.00038	1.02451	0.98858
1250.11	1.00679	0.989193	1.06338	1.00232	1.05086	0.969582
1254.75	0.973354	0.958056	1.02852	0.993264	1.04065	0.989931
1259.4	1.02303	1.02715	1.04505	1.00696	1.04847	0.970607
1264.04	1.00198	1.02015	1.04068	1.01026	1.02901	0.987766
1268.68	1.01229	1.03496	1.02828	1.00564	1.06323	0.982187
1273.33	1.00336	1.00863	1.0657	1.00357	1.03626	0.982222
1277.97	0.985281	1.01852	1.05207	1.00043	1.03075	0.969739
1282.61	1.02602	1.06818	1.0647	0.987297	1.0128	0.96778
1287.25	0.996168	1.03137	1.03083	0.995535	1.03586	0.960132
1291.89	1.00186	1.09325	1.05784	0.982835	1.0433	0.972484
1296.53	1.00914	1.05221	1.06136	0.998971	1.04982	0.995033
1301.18	1.04146	0.964664	1.04838	0.993111	1.03371	0.973648
1305.82	1.01387	0.998841	1.04761	1.00757	1.04797	0.992959
1310.46	1.00508	1.06465	1.0225	0.996404	1.04608	0.966158
1315.1	1.01932	1.07589	1.03364	0.998283	1.02194	0.975982
1319.74	0.996068	0.963025	1.05391	0.998415	1.02929	0.983304
1324.38	1.02089	1.08921	1.07404	1.01088	1.02874	0.972693
1329.02	1.00984	1.03912	1.03281	0.988295	1.0359	0.969256
1333.66	1.03596	1.074	1.07731	0.994074	1.05006	0.976197
1338.31	0.987734	1.04351	1.04383	1.00428	1.02887	0.976991
1342.95	1.01973	1.04529	1.07187	0.989641	1.04443	0.956899
1347.6	1.00822	1.04983	1.05872	0.988805	1.01478	0.977518
1352.24	0.991072	1.01036	1.05518	1.01131	1.05569	0.96965
1356.88	1.00632	1.02133	1.01416	0.988382	1.03464	0.977715
1361.52	1.00244	1.02908	1.02414	1.00208	1.05852	0.975978
1366.17	1.01065	0.991585	1.06925	0.989994	1.03432	0.963176
1370.82	1.00667	0.967279	1.05442	0.996198	1.02978	0.976567
1375.45	0.994248	1.02604	1.05964	1.00029	1.045	0.974897
1380.1	1.02377	1.04749	1.02272	0.999248	1.02313	0.972444
1384.73	1.00787	1.01816	1.06426	0.986285	1.02183	0.983651
1389.37	0.985317	1.02502	1.03137	0.996027	1.02428	0.980656
1394.01	0.997921	1.01666	1.04003	0.991742	1.03231	0.97563
1398.66	1.01638	1.01372	1.08177	1.00005	1.01623	0.976345
1403.35	0.999185	0.983543	1.02954	1.00865	1.0265	0.97795
1407.99	1.01687	1.05091	1.02677	0.992463	1.07054	0.963036
1412.63	0.998515	1.06508	1.04066	0.992285	1.05085	0.984654
1417.28	1.00624	1.00625	1.05683	0.990868	1.03383	0.969734
1421.92	1.01668	1.01832	1.03649	1.00471	1.03303	0.962113
1426.56	0.996976	1.04535	1.00444	0.993782	1.03995	0.972278

## Sheet: Panel h (miniG12 barplot)
GLPLight1	GLP1R
1.01237	1.0396
1.01824	1.08693
1.03997	1.07915

## Sheet: Panel i (Beta-arrestin2)
Time (sec)	GLPLight Beta arrestin2			GLP1R Beta arrestin2
0	0.977738	1.00674	0.986849	1.00727	1.02626	0.990585
5.59	0.994463	0.998702	0.999625	1.01276	0.989701	0.998501
10.233	0.995036	1.02047	0.992379	1.00749	0.996754	1.00283
14.872	0.99497	0.996615	1.00669	0.998566	1.00651	0.998612
19.513	0.988847	1.02687	0.990325	1.01106	0.991663	1.01802
24.154	0.985474	1.00816	0.978133	1.00319	1.027	1.00503
28.799	0.991256	1.04489	1.00607	0.998203	0.993339	1.02096
33.438	0.984533	1.00329	1.00955	0.995256	1.00156	0.986916
38.081	0.995664	0.984552	1.00972	1.00431	0.996988	0.985868
42.724	0.987046	1.01859	1.0007	0.992366	1.00152	0.986261
47.366	0.996956	0.991734	0.988038	0.994725	1.00655	0.992283
52.009	0.998213	1.00101	0.988499	0.990574	1.01484	1.00079
56.651	0.992992	0.989261	0.995114	0.997594	1.01917	1.00442
61.293	0.994833	0.981792	1.00771	1.00141	0.990951	0.996049
65.93	0.988356	1.00036	1.00143	0.998799	1.00931	0.985138
70.578	0.991661	0.9841	1.02377	0.983806	1.00842	0.997363
75.219	0.988245	1.04305	1.00549	1.0065	0.98782	0.992675
79.869	0.992802	1.00549	0.996617	1.00246	0.986008	0.997106
84.513	0.993187	0.992299	1.01371	0.999098	1.03178	1.00266
89.165	0.993696	0.998016	0.998432	0.998582	1.00682	1.00283
93.813	0.994677	0.989302	1.00667	1.0006	1.00586	0.989601
98.451	0.986932	0.98711	0.991684	0.992097	1.01226	1.0015
103.097	1.00032	1.03678	1.00543	1.00001	0.991385	1.00183
107.74	1.00891	1.00158	0.996958	0.996422	0.987488	0.999788
112.387	0.998485	0.968358	1.00315	0.989529	0.989702	0.994077
117.035	0.988467	0.997604	0.993812	0.998586	1.00371	0.987915
121.679	1.00296	1.02087	0.992573	0.999864	1.00785	0.9907
126.323	1.00081	0.986177	0.991145	1.00316	0.995439	0.975613
130.963	0.996376	1.01408	0.99035	0.994388	0.995104	0.997708
135.613	0.988527	1.00835	0.990413	0.998062	1.01939	1.00459
140.258	1.0015	1.04382	0.996112	1.0032	0.999153	0.992312
144.904	0.999001	1.00246	1.00042	0.994688	0.989371	0.994129
149.547	1.00443	1.00916	0.997458	1.00756	1.01683	0.990918
154.194	0.995508	1.00148	1.0059	0.999835	0.982801	0.999945
158.835	1.01151	1.00059	1.00313	0.997225	0.986311	0.990364
163.476	1.00499	0.996258	0.999923	0.992747	1.00481	1.00666
168.117	1.00176	1.0296	1.0062	0.995565	0.994965	0.994686
172.761	1.01597	1.00119	0.993621	0.997345	1.01448	0.994766
177.404	1.00459	0.987926	0.991414	1.00822	0.993816	1.00705
182.045	0.99318	0.986894	0.975787	0.996133	0.990202	1.01005
186.693	0.986749	0.990375	1.0039	0.998506	1.00704	1.00612
191.336	1.00622	1.02356	1.00686	0.989786	1.00985	1.00721
195.981	0.98989	1.02726	0.995316	0.997813	0.998615	0.995467
200.624	0.991582	1.0094	1.01625	0.990862	1.00903	0.997267
205.265	1.0097	0.987994	0.992509	0.996447	1.03053	1.00107
209.917	1.00836	1.00465	0.9995	1.00293	1.01683	1.0123
214.557	1.00871	0.996314	0.99936	0.998092	0.992731	1.01477
219.196	0.977993	0.982652	0.99894	1.00744	1.01382	0.984508
223.84	0.998797	0.985704	1.00643	0.995914	1.01202	1.01134
228.483	0.990798	0.988741	1.0057	0.997348	0.999706	0.999589
233.123	1.0083	0.991557	0.999573	0.99681	1.01025	0.988124
237.765	1.00191	0.990954	0.992632	1.00468	1.00719	1.00194
242.41	1.00707	1.01592	1.00643	0.996458	1.01225	0.992434
247.048	0.992961	0.981209	1.00217	1.00758	0.99236	1.00819
251.69	0.99759	0.989404	1.00568	0.997617	1.01338	0.994958
256.34	1.01599	1.00316	1.00176	1.00011	1.0225	1.00807
260.98	0.996325	0.97949	1.00589	1.00296	1.00334	0.994131
265.628	1.00297	0.980644	1.01927	1.00022	0.999359	0.997259
270.27	0.990075	0.994946	0.99091	1.00176	0.98746	1.00178
274.913	1.00743	1.01699	0.993733	0.990402	0.998515	1.007
279.556	1.01027	1.01454	1.01059	0.997722	0.998745	0.996297
284.197	1.00482	0.992557	1.01213	1.00801	1.01408	0.992084
288.845	1.01704	0.999727	0.986781	1.00876	1.00856	1.00243
293.493	1.00392	1.02024	1.01047	1.00023	0.976586	0.999936
298.133	1.00764	0.975372	1.00126	0.996773	1.00258	1.01227
302.779	1.0038	0.990236	1.00408	0.999347	0.989157	0.996783
307.423	0.993169	1.01545	0.988224	1.00046	1.00527	0.99478
312.069	0.998409	0.989273	1.01549	1.0065	0.981169	1.0182
316.711	1.00418	0.986201	1.01235	0.995382	0.99121	0.994602
321.357	1.00662	1.02017	0.994391	1.00387	0.983585	1.00349
326.003	1.02108	1.01477	0.992346	0.99537	0.989492	0.992572
330.641	1.0083	1.00591	0.991763	1.00685	0.988959	0.999097
335.28	1.00013	0.992057	0.998054	1.00293	0.989384	1.01884
339.924	1.00446	0.975788	1.00297	0.994698	0.988321	1.00418
344.566	0.998424	0.975373	0.990336	1.00444	0.993382	1.00364
349.208	0.999806	0.99152	1.00572	0.988643	1.01441	1.0051
353.853	1.01228	0.980121	0.988716	1.00058	0.995489	0.993346
358.495	0.993057	0.967682	1.01215	1.00205	0.99935	1.00421
363.133	1.01326	0.994394	1.00245	0.998059	1.00406	1.0157
367.778	1.01567	0.986036	1.01896	0.998042	0.994506	1.01892
372.42	0.98532	0.992521	0.985661	0.99729	1.00809	1.00576
377.065	0.992288	1.00323	1.01006	1.00462	0.996616	1.00815
381.707	0.993742	0.986969	1.00369	1.00222	0.99366	0.996876
386.349	1.00317	1.0013	1.00797	0.999646	0.994208	1.0112
390.995	1.0075	0.981581	0.989551	1.00038	0.998387	1.00611
395.641	0.995776	1.03134	1.00044	0.999762	0.985482	0.997517
400.281	0.997645	0.972097	0.996528	0.997717	0.98901	0.99733
404.929	0.999776	1.02268	1.0071	1.0032	1.01022	1.00048
409.572	1.0231	1.04476	0.982535	0.999923	0.979154	1.00449
414.215	1.00283	0.987026	0.989936	0.994795	0.977483	0.996975
418.859	1.00632	0.995473	1.0036	1.01003	0.980709	0.987699
423.504	1.02377	0.988929	1.01221	0.997804	0.996704	0.991473
428.143	0.998359	0.998722	1.00207	1.00388	1.01018	1.01263
432.783	1.0146	0.993483	0.992155	1.01099	0.98468	0.992294
437.43	1.00366	1.00519	1.00045	0.993091	0.987129	1.00948
442.079	1.00176	1.00059	0.997727	1.00148	0.994359	0.999487
446.72	1.01847	0.985308	0.988888	1.005	0.997591	1.0145
451.361	1.01856	1.01491	1.00161	1.00308	0.997386	0.997905
456.009	0.984068	0.998619	1.00767	1.01494	0.987214	0.997648
460.654	0.998666	1.01101	1.00711	1.00845	0.988957	0.992904
500.654	1.05036	1.10208	0.99028	1.4933	1.73576	1.51744
507.197	1.04707	1.13667	0.978889	1.50815	1.9281	1.68226
511.835	1.03514	1.05134	0.970327	1.57526	2.17843	1.83365
516.483	1.0694	1.05399	0.974684	1.61762	2.39173	1.9384
521.124	1.05672	1.02058	0.995991	1.66017	2.51762	2.07806
525.767	1.06332	1.05676	1.01785	1.68144	2.67244	2.19225
530.414	1.02859	1.03317	1.02726	1.70706	2.81317	2.26294
535.062	1.02877	1.02789	1.01929	1.74546	2.95844	2.33367
539.702	1.03261	1.01602	1.00155	1.77273	3.16255	2.37778
544.342	1.03167	1.01622	1.00662	1.79282	3.2766	2.49743
548.993	1.0364	0.993952	1.0195	1.8029	3.34075	2.54483
553.638	1.02885	1.01289	0.994823	1.81127	3.55936	2.60075
558.278	1.02788	1.02243	1.00978	1.83919	3.55904	2.6455
562.928	1.03838	1.01006	1.01586	1.84921	3.68518	2.6993
567.573	1.02531	1.01993	1.0049	1.87209	3.7269	2.69349
572.213	1.0338	1.01328	1.01275	1.86934	3.78088	2.75732
576.855	1.04127	0.997049	1.02701	1.90271	3.8571	2.82057
581.498	1.02767	1.01903	1.01943	1.87435	4.00351	2.76816
586.144	1.06013	1.02293	1.02962	1.88602	3.93021	2.81367
590.785	1.03919	1.02614	1.01115	1.91112	4.0685	2.86976
595.427	1.04279	1.00665	1.02118	1.92698	3.92905	2.84558
600.073	1.04135	0.988476	1.02873	1.92508	4.05375	2.85783
604.717	1.03778	1.00841	1.02135	1.91636	4.09518	2.83852
609.355	1.03706	1.02472	1.00459	1.92169	4.08139	2.91233
614.003	1.04015	1.06632	1.03641	1.93122	4.03638	2.89107
618.649	1.03594	0.996517	1.03337	1.93169	4.12376	2.93844
623.29	1.03841	0.977532	1.02062	1.91915	4.11946	2.92187
627.932	1.02854	0.974127	1.01937	1.95181	4.07201	2.92733
632.586	1.02476	1.01128	1.01425	1.93281	4.17493	2.92681
637.234	1.03811	0.963812	1.02403	1.94108	4.12502	2.98941
641.874	1.02875	1.02939	1.0194	1.93001	4.11624	2.93276
646.532	1.03686	1.01624	1.02463	1.94729	4.19687	2.94584
651.182	1.02737	0.997551	1.02312	1.92394	4.22281	2.94714
655.825	1.03814	0.990723	1.01625	1.95121	4.12445	2.92777
660.467	1.03324	1.03511	1.01067	1.94526	4.19878	2.93694
665.116	1.02272	0.985469	1.02535	1.94446	4.17443	2.96814
669.759	1.03805	0.985714	1.01674	1.94628	4.16904	2.90826
674.404	1.0273	1.02083	1.03513	1.92529	4.13246	2.90387
679.053	1.05735	0.993267	1.01995	1.92735	4.27292	2.93387
683.701	1.03154	1.0097	1.0144	1.92988	4.1242	2.89919
688.339	1.04065	0.992532	1.01755	1.92973	4.16535	2.9215
692.981	1.02235	1.01894	1.03846	1.91344	4.10807	2.88138
697.633	1.03363	0.990282	1.00254	1.92646	4.18859	2.93273
702.279	1.02231	1.02458	1.02529	1.93755	4.14766	2.87523
706.922	1.03795	0.978421	1.03136	1.90691	4.1505	2.86542
711.568	1.03061	1.04427	1.01681	1.90658	4.05583	2.88769
716.214	1.02696	0.993139	1.02461	1.90971	4.10284	2.86493
720.852	1.04378	1.01564	1.0138	1.9037	4.0895	2.88245
725.498	1.05586	0.974061	1.02849	1.88585	4.12126	2.88779
730.149	1.03571	1.00604	1.02557	1.90047	4.05908	2.84852
734.796	1.038	1.02719	1.02675	1.88403	3.9938	2.86705
739.438	1.03069	1.01624	1.0167	1.88207	4.07137	2.82841
744.089	1.03374	0.974221	1.01655	1.90135	4.01215	2.84565
748.74	1.05581	0.965045	1.02105	1.87876	4.06621	2.80643
753.382	1.01894	0.977712	1.01894	1.87738	4.08817	2.83665
758.032	1.02804	1.02032	1.01512	1.88085	3.91677	2.81446
762.683	1.03868	0.981305	1.01793	1.89341	4.02069	2.81578
767.333	1.03502	1.02535	1.0036	1.88066	3.99465	2.79029
771.973	1.04637	0.981307	1.01054	1.84133	3.94465	2.80335
776.617	1.04184	1.01538	1.02352	1.89341	4.02263	2.7976
781.267	1.03544	0.956782	1.02469	1.86714	3.98394	2.72512
785.907	1.03649	1.02913	1.00641	1.84113	3.9356	2.78567
790.553	1.0374	0.984882	1.01458	1.87165	3.92863	2.7944
795.206	1.04787	0.998639	1.01603	1.87126	3.93437	2.8139
799.852	1.03527	1.02334	1.02195	1.84969	3.90427	2.81855
804.492	1.05003	1.00829	1.02257	1.83961	3.90117	2.7578
809.14	1.02959	0.964918	0.998966	1.84627	3.94064	2.74844
813.794	1.03384	1.05824	1.02316	1.84109	3.90141	2.73284
818.434	1.0384	1.01858	1.01901	1.83295	3.88951	2.79318
823.078	1.0236	1.00874	1.02892	1.85091	3.90579	2.7561
827.73	1.02469	0.98296	1.01506	1.82565	3.82574	2.75144
832.38	1.02998	0.996612	1.01078	1.8241	3.90284	2.74998
837.022	1.00832	0.97013	1.02733	1.81773	3.81047	2.72797
841.666	1.03753	0.969328	1.02461	1.8308	3.75874	2.65932
846.31	1.02386	1.00276	1.02221	1.80563	3.80117	2.68012
850.952	1.02645	1.0132	1.01792	1.81775	3.84949	2.70924
855.594	1.03518	1.02039	1.00387	1.82241	3.79991	2.68034
860.236	1.03702	0.975488	1.01021	1.80082	3.78966	2.68615
864.88	1.0273	0.975478	1.01116	1.81677	3.78734	2.65711
869.519	1.0441	0.980584	1.03512	1.77565	3.72216	2.64286
874.16	1.02162	0.977417	1.00619	1.80671	3.76585	2.69169
878.806	1.03771	0.984337	1.01169	1.79394	3.79313	2.67609
883.444	1.04444	1.043	1.0198	1.81179	3.71656	2.60823
888.086	1.0487	1.01191	1.03105	1.77071	3.76049	2.63114
892.726	1.03312	0.983114	1.02063	1.7872	3.68135	2.62744
897.368	1.04195	1.00192	1.01323	1.82352	3.72348	2.61956
902.006	1.0499	0.991996	1.0227	1.81575	3.66746	2.62546
906.643	1.05867	0.974073	1.02422	1.78975	3.6279	2.64074
911.288	1.03588	0.965331	1.01883	1.78358	3.63738	2.57926
915.928	1.04093	0.994032	1.01641	1.76797	3.72681	2.59584
920.568	1.04988	0.996227	1.01152	1.75944	3.61859	2.57577
925.214	1.04224	0.983194	1.0237	1.75191	3.72074	2.57898
929.856	1.03285	1.00578	1.01098	1.79054	3.63005	2.58107
934.496	1.04936	1.02452	1.01004	1.77498	3.65484	2.57403
939.138	1.0375	1.00553	1.01178	1.76096	3.54266	2.55152
943.779	1.04232	0.9475	1.01591	1.75928	3.64006	2.56327
948.418	1.04466	1.00716	1.01948	1.73299	3.62696	2.58707
953.059	1.03348	1.00159	1.00135	1.74899	3.56373	2.53412
957.696	1.02704	0.979599	1.02038	1.74542	3.57575	2.52002
962.338	1.0362	0.990761	1.00147	1.75105	3.56152	2.55305
966.976	1.03718	0.988919	1.02138	1.7368	3.51528	2.53872
971.614	1.03128	1.00703	1.02011	1.76236	3.52984	2.51505
976.256	1.02569	0.971476	1.01801	1.74643	3.57843	2.50381
980.895	1.05261	0.995798	1.02228	1.74109	3.50627	2.53245
985.535	1.04907	1.01136	1.00471	1.72997	3.51673	2.51088
990.174	1.04754	0.974719	1.02497	1.72883	3.55315	2.55965
994.82	1.02207	0.95061	1.01481	1.72567	3.54627	2.49756
999.465	1.03146	0.988763	1.01336	1.72538	3.50366	2.49341
1004.11	1.02914	1.0091	0.999444	1.72994	3.52619	2.48289
1008.75	1.03733	0.975364	1.00431	1.73176	3.4651	2.47668
1013.39	1.04238	0.982572	1.00869	1.73275	3.46803	2.48133
1018.03	1.03469	0.985956	1.01444	1.71026	3.48439	2.4366
1022.68	1.02301	0.995294	1.02893	1.72434	3.48929	2.48556
1027.32	1.02794	0.98347	1.0104	1.71572	3.44102	2.47146
1031.96	1.03527	0.990708	1.0103	1.72269	3.413	2.4643
1036.6	1.0473	0.9917	1.01334	1.70646	3.45872	2.44568
1041.25	1.01295	0.994796	1.02106	1.69307	3.39432	2.44266
1045.89	1.04209	1.00411	1.00848	1.7064	3.39933	2.47085
1050.53	1.03336	1.01952	1.01294	1.72406	3.38644	2.4286
1055.17	1.0384	1.004	1.00307	1.69518	3.38926	2.43803
1059.81	1.04554	1.01793	1.00162	1.69943	3.37222	2.41013
1064.45	1.0481	0.991365	1.01777	1.70052	3.35812	2.44194
1069.09	1.03607	0.978859	1.01722	1.69589	3.40103	2.44316
1073.73	1.04534	1.01291	1.00197	1.69695	3.38903	2.43391
1078.37	1.03832	0.972129	1.01119	1.7	3.40263	2.44073
1083	1.03478	0.978614	1.01263	1.66916	3.32411	2.38321
1087.64	1.03523	0.995648	1.01093	1.69514	3.32011	2.38393
1092.29	1.02479	0.994811	1.02167	1.68211	3.37061	2.41814
1096.93	1.04435	1.01106	1.00013	1.68394	3.36059	2.43876
1101.56	1.0437	0.970523	1.01075	1.67703	3.30365	2.36184
1106.21	1.03021	0.985558	1.0185	1.6819	3.35807	2.41968
1110.85	1.04389	0.968763	1.03165	1.6713	3.36165	2.37448
1115.49	1.0238	0.994224	1.00866	1.66822	3.27187	2.34922
1120.13	1.03925	1.01057	1.02145	1.68808	3.3221	2.32901
1124.78	1.03503	0.987044	1.01587	1.65117	3.27732	2.36527
1129.42	1.03439	0.99076	0.999505	1.66373	3.23671	2.39572
1134.06	1.0369	0.989211	0.997906	1.68049	3.28056	2.34888
1138.7	1.04439	0.997674	1.01693	1.66087	3.29484	2.30595
1143.35	1.03262	0.964142	0.993852	1.68402	3.29828	2.3748
1147.98	1.03203	1.00635	1.01842	1.66116	3.28347	2.3469
1152.63	1.05442	0.974625	1.01686	1.65473	3.2506	2.35131
1157.27	1.03026	0.963624	0.994682	1.65414	3.17703	2.39761
1161.91	1.02584	1.01038	1.00272	1.64744	3.29245	2.36829
1166.55	1.02827	0.961112	0.994387	1.6546	3.20592	2.32687
1171.2	1.03662	0.986598	1.03047	1.65153	3.1937	2.35352
1175.84	1.02381	1.00164	1.00211	1.63989	3.23844	2.31006
1180.49	1.04359	0.976091	1.00315	1.64999	3.19983	2.31673
1185.13	1.03743	1.01203	0.999206	1.64802	3.21924	2.31823
1189.77	1.03266	1.01843	0.997497	1.63629	3.2143	2.30176
1194.41	1.02865	0.970525	1.00175	1.64733	3.209	2.31895
1199.06	1.01886	0.968559	0.997017	1.63673	3.15453	2.32886
1203.7	1.03676	0.998738	1.01813	1.64498	3.21442	2.24241
1208.34	1.03576	0.97435	1.01316	1.64111	3.15609	2.29729
1212.98	1.05522	1.00338	0.982044	1.64448	3.12249	2.30207
1217.62	1.04008	0.982243	1.00624	1.62983	3.1687	2.30407
1222.26	1.03844	0.976727	1.00235	1.63832	3.15946	2.28314
1226.9	1.04704	1.01339	1.01095	1.63395	3.09777	2.30535
1231.54	1.03432	1.01501	1.01449	1.6158	3.16732	2.33124
1236.19	1.04866	0.956056	1.00713	1.62529	3.07629	2.24563
1240.83	1.03932	0.995067	1.01668	1.63488	3.14852	2.27355
1245.47	1.03849	0.997845	1.02677	1.63444	3.09219	2.30281
1250.11	1.03505	0.973528	0.99691	1.63405	3.16169	2.27461
1254.75	1.03401	0.993469	1.00796	1.63943	3.11172	2.26931
1259.4	1.03917	0.978838	1.00969	1.61672	3.12231	2.23399
1264.04	1.04025	0.944338	1.00448	1.62295	3.04944	2.26276
1268.68	1.02886	0.977719	1.01364	1.6252	3.11162	2.28622
1273.33	1.03948	0.998314	1.0205	1.62201	3.08346	2.25215
1277.97	1.02988	0.986648	1.01838	1.59919	3.11341	2.2675
1282.61	1.04675	0.983414	1.00116	1.61634	3.13701	2.26305
1287.25	1.01235	1.03211	1.00203	1.606	3.10527	2.2256
1291.89	1.03917	0.974391	0.995739	1.60794	3.03445	2.23631
1296.53	1.03581	0.968575	0.992651	1.62736	3.01373	2.21592
1301.18	1.02671	0.985225	1.01756	1.62567	3.03171	2.22814
1305.82	1.04153	0.959618	0.994764	1.61419	3.09666	2.26579
1310.46	1.05031	0.994439	1.0162	1.60685	3.00633	2.21036
1315.1	1.02708	0.986649	1.00656	1.59056	3.02484	2.24314
1319.74	1.03421	0.978311	0.996638	1.60908	2.99921	2.20693
1324.38	1.0381	0.976681	1.00971	1.61338	3.02239	2.25581
1329.02	1.03772	1.01116	0.998091	1.61675	3.02105	2.20037
1333.66	1.02761	1.0281	1.01199	1.5797	3.04185	2.22431
1338.31	1.03345	0.957984	0.991432	1.61424	3.04724	2.18537
1342.95	1.04144	0.936091	1.00622	1.59215	3.05831	2.24521
1347.6	1.04505	0.975239	1.01378	1.602	3.01663	2.22758
1352.24	1.03444	0.944382	1.00881	1.58964	2.98262	2.22771
1356.88	1.04611	0.990481	1.00984	1.59187	3.02364	2.18592
1361.52	1.02932	0.96492	1.01614	1.58254	2.98217	2.19249
1366.17	1.03003	0.943107	1.00003	1.5702	3.08859	2.17732
1370.82	1.03754	0.973603	1.0195	1.61497	3.04131	2.1839
1375.45	1.03266	0.982045	1.02526	1.59411	2.99077	2.20958
1380.1	1.02889	0.974407	1.01466	1.5908	2.96204	2.22067
1384.73	1.04085	0.984813	0.999591	1.59915	2.98469	2.19524
1389.37	1.0449	0.977193	0.996771	1.60482	3.03004	2.19105
1394.01	1.03441	0.992621	1.01139	1.57096	2.96632	2.16018
1398.66	1.02018	0.962118	0.99214	1.61553	2.9719	2.18299
1403.35	1.0461	0.973006	1.01292	1.57818	2.93502	2.18077
1407.99	1.0312	0.973163	0.995168	1.58272	2.91017	2.14273
1412.63	1.04069	1.00181	1.00689	1.61167	2.93403	2.1848
1417.28	1.02835	0.977686	1.00424	1.5779	2.92494	2.17993
1421.92	1.03951	1.01333	1.01218	1.58624	2.9371	2.19675
1426.56	1.05778	0.963301	1.01142	1.55729	2.94681	2.17001

## Sheet: Panel j (barplot Beta-arr2)
GLPLight1	GLP1R
1.03401	4.14016
1.00442	1.93257
1.0214	2.91818

[truncated: 1 more sheets: Panel k (cAMP)]
