# Supplementary material for: Optical tools for visualizing and controlling human GLP-1 receptor activation with high spatiotemporal resolution
Source: eLife. 2023 Jun 2;12:RP86628. doi: 10.7554/eLife.86628 (PMC10262203; doi:10.7554/eLife.86628)
Supplement: Figure 1—source data 1. [file elife-86628-fig1-data1.xlsx]

## Sheet: Panel c (Max DFF)
Neurons	HEK 293T
344.077	679.591
503.775	715.723
367.385	524.881
443.958	610.056
468.541	583.727
429.624	587.348
546.817	514.375
362.293	802.357
413.332	333.044
460.151	474.559
465.978	454.891
433.414	480.847
423.505	421.805
589.821	429.598
570.603	419.259
503.233	635.532
445.065	484.149
379.3	473.031
621.715	431.596
430.467	437.892
530.663	495.42
392.599	582.515
498.576	465.168
341.616	460.847
524.301	280.825
513.22	598.699
447.092	573.786
310.896	618.194
358.101	623.551
500.049	648.954
442.383
400.418
493.569
500.476
483.966

## Sheet: Panel d (spectra)
Wavelength	GLPLight1 - GLP1 ex			GLPLight1 +GLP1 ex			GLPLight1 - GLP1 em			GLPLight1 +GLP1 em
300	-12.4953	10.0712	10.6902	3.15961	16.5519	4.46955
302	14.1889	3.19118	-0.12243	5.9505	9.20466	8.26995
304	-0.97123	0.204144	4.15286	-4.18337	6.02721	4.02128
306	-8.04231	3.10682	5.16935	5.19731	8.38482	3.41973
308	6.84326	-7.31946	8.22165	2.39627	0.698716	-1.00877
310	-6.70209	6.5016	6.05159	10.5611	-3.84478	3.40009
312	-11.1042	9.53571	-2.71194	-5.54958	3.27065	0.60308
314	14.3749	12.936	1.70726	-8.31155	15.0011	3.4561
316	-2.66549	2.80233	5.26708	2.68965	2.89068	0.986254
318	2.55664	1.27375	0.708076	-4.73063	2.11108	0.988234
320	0.982285	-2.34117	5.78548	8.04832	-1.50727	0.903692
322	0.218543	6.34096	-0.64331	7.80835	2.57802	1.24222
324	-1.0779	-3.74392	1.95794	0.602216	-1.12393	2.02679
326	5.74426	4.55079	0.417787	-0.94074	0.512089	-0.4859
328	1.28841	2.99484	1.14868	0.613534	-0.95812	-2.86781
330	1.01961	-0.76779	0.206931	-3.20735	-1.17252	0.763864
332	-6.31571	-3.86751	-3.01318	-3.65363	2.09504	0.275992
334	0.515415	-3.06961	-0.39468	-1.22237	-1.93058	-0.95516
336	-1.39261	-2.43775	0.319833	-8.32201	0.531125	-0.81626
338	3.86555	-3.44155	-0.25471	0.004659	-1.12137	-4.86419
340	-0.27499	-0.34407	0.044364	2.25712	-1.40623	1.91417
342	0.540728	0.439249	2.84079	-1.57235	2.95675	0.458184
344	5.88428	-9.67797	1.14429	-4.48766	1.38362	2.28273
346	9.29984	-1.03893	2.84291	-3.42714	4.99674	-1.04198
348	0.652982	0.44747	-2.19794	3.50721	-0.11421	5.37195
350	1.13678	-0.5151	-0.81872	7.02558	-1.54988	-3.46961
352	-3.17159	-0.98334	7.70268	3.86573	1.10817	-1.35415
354	6.63862	0.696348	11.6186	1.69374	0.746641	3.76519
356	5.46228	2.86318	5.75245	6.7674	7.45913	2.08184
358	11.9258	0.395471	7.41949	5.93027	13.1482	5.62523
360	15.0461	0.353678	9.22332	0.535376	9.21219	5.70706
362	12.2773	8.73104	10.6988	3.00129	11.9639	9.34456
364	24.5263	8.22409	14.7924	8.38884	10.0391	8.60397
366	16.5479	8.49325	15.5319	1.56199	14.1776	11.1674
368	4.82377	15.5586	16.39	12.8726	14.239	16.051
370	19.0469	19.9756	19.4825	9.83304	16.3922	13.7241
372	23.8497	18.3292	19.3359	8.75956	19.5343	17.3627
374	26.8332	22.6204	27.2698	6.53072	17.1298	15.2594
376	29.7118	24.0159	24.9078	8.04643	24.0107	19.0288
378	19.6711	32.1617	26.0532	20.6093	23.2003	19.3945
380	29.2498	25.8464	31.8115	5.2821	19.0291	24.0402
382	36.2044	29.0367	28.7529	8.801	27.5312	25.1566
384	33.2907	30.4273	32.693	16.6493	28.2503	21.2225
386	30.4698	35.7239	35.9975	15.8053	31.3824	26.8875
388	38.0206	34.6158	32.2993	20.9657	31.4163	26.2642
390	37.8488	36.7144	35.4084	15.0095	33.6893	27.9367
392	40.3791	37.2026	38.031	18.103	34.7486	26.5095
394	33.4046	35.6763	36.0933	24.9224	34.9488	29.009
396	28.2618	41.5059	38.2935	20.4221	31.2943	32.1721
398	40.864	40.7519	38.7276	21.8492	35.6039	29.7573
400	38.0524	40.246	44.2872	17.1597	29.1812	34.1133
402	39.3363	44.0881	41.5331	25.2681	34.1582	35.7708
404	39.7005	46.0215	41.236	25.2758	37.4637	33.6365
406	38.6271	40.7091	42.9557	19.2283	34.5264	33.546
408	41.1622	38.9967	40.2035	17.1072	36.7489	32.3033
410	31.664	38.1559	41.2057	14.6265	41.2089	32.962
412	38.3873	39.2075	39.7177	15.3242	40.6571	34.2892
414	31.6072	37.8109	39.2962	22.4877	40.5166	36.0732
416	28.0569	37.9761	39.0111	18.5404	42.0898	38.6949
418	26.9718	34.3364	40.4023	18.0345	37.0711	33.7213
420	30.8438	35.952	36.87	14.66	38.8789	34.973
422	21.7416	30.6467	36.6371	15.4135	37.8696	33.115
424	22.1606	32.8172	33.0277	12.234	37.8102	33.4631
426	16.4188	32.3163	36.0713	11.9052	39.6854	34.942
428	10.0566	27.487	34.1397	16.4234	38.2699	33.6075
430	11.7521	33.4085	32.2244	12.7583	40.4314	31.6447
432	9.11302	27.423	33.9963	11.5619	37.3064	36.286
434	4.72272	28.5336	31.3536	9.28436	41.3041	34.0322
436	10.0061	17.3462	26.8421	9.48363	38.1064	36.8578
438	5.05193	17.8986	28.2721	16.6784	37.867	33.8538
440	7.37403	23.8269	28.115	9.45053	50.1294	34.7613
442	-5.3023	15.2852	31.3742	11.1822	37.3122	36.0868
444	0.206509	18.2909	27.1483	15.8264	40.0119	34.9078
446	-0.57872	13.5769	28.0586	9.2464	43.5336	38.1342
448	3.59611	17.7389	26.4364	8.39396	45.5883	38.4393
450	-4.6179	18.6002	25.2322	13.5656	43.8227	38.5691
452	-3.67906	16.6508	29.7449	13.0353	48.8996	42.9462
454	-4.09719	19.9186	27.5515	31.4366	51.1536	45.7335
456	-6.55692	19.9113	27.8362	19.9139	49.6153	46.9752
458	-4.43512	17.0618	26.1878	26.0141	55.405	47.4247
460	-0.18715	20.2618	31.4118	34.6501	50.032	48.5372
462	-5.80449	18.3848	26.3449	35.7341	56.4144	53.3834
464	-4.81571	20.5823	27.4734	33.1855	55.2548	51.228
466	5.58804	21.086	27.1842	35.7578	59.0817	51.6618
468	6.19997	17.0053	29.2334	47.7698	65.0941	53.7784
470	0.562009	23.91	28.7529	32.4184	68.755	54.3072
472	13.5994	26.8493	28.8068	46.4029	64.6776	57.4603
474	11.9831	28.2398	32.8045	49.0294	68.0795	67.8844
476	17.969	33.1947	31.1818	56.0722	75.9994	70.0247
478	11.26	31.2297	37.7442	69.1241	84.3576	76.5911
480	12.2	28.7057	35.584	67.174	80.7194	71.8703
482	14.314	32.5745	33.5517	66.7352	81.8136	78.6991
484	15.736	34.8179	35.5521	76.6979	84.6203	77.1799
486	16.0693	34.2632	33.3659	78.9601	85.7518	81.361
488	16.8472	31.3316	34.5701	78.4161	86.8562	83.7931
490	24.8225	38.0921	39.8876	86.8594	94.2501	89.5937
492	22.9214	38.9493	40.2207	98.8301	95.9427	93.5042
494	30.1883	37.0031	38.8998	101.339	102.013	96.914
496	27.7524	43.5052	40.2481	99.1055	100.843	95.2746
498	34.6038	44.8113	40.0365	100.01	100.007	100
500	32.6109	45.0538	40.4174	99.6624	96.897	88.6364
502	38.4615	46.0465	39.8193	97.0468	93.8667	89.1337
504	40.0695	49.6903	44.482	86.5846	86.0008	82.5794
506	39.1248	48.9611	41.4645	81.3888	75.2206	75.3781
508	43.4525	46.9295	41.0766	73.0342	70.9452	68.2298
510	36.4103	47.0232	38.9267	59.7971	60.2322	56.3385	16.2889	27.8632	24.1573	99.147	93.3461	94.7018
512	38.709	43.4148	35.6495	47.566	51.7131	48.2458	17.1257	25.2962	27.1626	100.011	95.5259	98.4318
514	32.7583	35.1168	29.9307	40.6712	44.1861	38.8618	16.2079	27.3182	29.7623	98.4662	100.004	100.186
516	27.1028	30.2977	27.0817	32.9525	33.0015	35.205	18.3817	30.9851	31.7748	98.2236	97.7798	102.315
518	22.69	25.9426	21.9111	24.4493	24.9468	25.2346	15.8447	31.5571	32.4537	93.5099	98.6196	102.742
520	19.576	22.1266	19.9182	18.393	21.182	21.4498	20.5579	32.0511	33.2135	90.9809	92.4569	96.6349
522							17.4654	29.3255	30.766	86.387	91.2934	92.303
524							18.7612	31.7729	30.474	80.0601	84.7549	88.2067
526							15.0624	28.5562	29.6853	74.9852	79.8353	83.4287
528							15.0751	27.3151	28.6187	64.7431	72.4949	77.0036
530							16.3046	22.902	26.6498	63.4872	71.3508	72.351
532							14.1783	21.9677	26.2438	57.2796	66.5048	67.1845
534							8.21781	20.4971	25.2091	55.3268	61.0375	63.2431
536							6.62635	19.4054	21.9002	49.4438	58.3917	60.2776
538							9.67531	18.0193	21.1034	47.4169	52.7719	54.246
540							8.02936	17.1787	20.1248	43.93	53.5207	52.6696
542							7.76174	14.7359	18.6739	41.6671	49.2212	48.9092
544							8.47988	15.2348	18.3706	38.4712	45.2673	47.7493
546							8.82264	12.991	18.917	36.3223	43.0156	44.1072
548							6.80206	12.4297	17.602	31.2351	44.1596	43.9367
550							5.43587	13.2243	16.8505	32.2606	42.2743	41.2179
552							8.29652	12.0694	18.0571	29.5042	36.9727	37.2571
554							5.02364	11.3661	14.9124	27.1463	35.1123	38.4167
556							1.86771	13.1228	16.1129	29.2584	33.5645	32.784
558							5.0052	11.5952	14.4823	23.9696	31.7356	28.957
560							6.57476	13.1161	14.9032	19.2542	29.1948	31.1231
562							6.28323	9.26577	13.1283	23.2311	26.6332	27.5869
564							3.6028	8.64297	12.3655	19.3592	24.6785	25.3676
566							4.27897	8.95407	13.1653	16.8195	24.9346	24.2847
568							3.52818	7.26527	12.4088	16.8129	22.7403	21.6466
570							2.83639	8.62234	11.957	14.3163	21.1489	18.7819
572							0.561541	9.18911	11.0284	9.38105	22.6117	19.208
574							1.96391	5.9358	11.482	14.3406	19.5274	17.787
576							2.44976	6.4819	9.38593	11.4158	16.4878	15.4266
578							0.535202	6.85484	9.79383	8.60673	16.6206	16.3194
580							4.27552	6.73707	8.80382	7.43108	15.5031	14.8569
582							3.7914	7.26225	7.50387	6.32218	14.6271	13.5075
584							3.52575	6.63118	8.73991	3.86953	14.0585	12.0961
586							1.64395	4.61238	9.25327	7.98051	10.2614	13.4889
588							1.36751	5.21962	7.15048	7.05914	11.2775	12.3311
590							0.983658	7.66561	6.89477	4.63701	10.6345	10.908
592							0.836371	4.2324	6.5768	4.55226	10.6264	10.5061
594							-0.49672	2.49861	5.69471	2.58472	10.5696	8.99372
596							2.16486	3.67278	5.64468	4.31147	8.71294	8.98493
598							2.22094	5.38327	6.68719	4.14175	9.70359	7.58719
600							3.23552	5.42441	5.41476	3.16172	7.53523	8.34881
602							-0.52574	3.0756	6.28167	3.82781	9.04471	7.31342
604							1.48301	4.31385	5.52725	2.2224	7.19474	7.68954
606							0.297029	4.00578	5.65705	3.00261	6.81264	6.81927
608							1.15442	2.45309	5.77262	0.808862	7.11789	6.98503
610							1.98452	3.40764	4.51358	1.40583	5.5964	5.42504
612							0.962073	3.49609	4.50199	1.53787	4.44008	5.61232
614							0.112007	2.56695	5.76712	2.29177	4.59317	4.82862
616							-0.94007	2.15344	3.39529	1.82893	5.37289	4.53463
618							1.01019	3.24214	4.26367	1.03468	4.45144	4.80224
620							0.835164	2.79353	4.25973	1.41955	4.51813	5.15087
622							0.344437	2.69049	3.53231	2.75773	4.51648	4.69728
624							0.902875	2.50606	3.22253	1.43983	4.73467	4.44694
626							0.722257	2.70227	2.90059	0.731577	4.73434	4.73455
628							0.457008	2.9484	3.47886	-0.49204	4.09598	4.20614
630							1.0381	2.11394	4.59882	0.366619	3.05697	3.57934
632							0.509768	1.93803	2.79506	0.303927	3.68058	3.34167
634							0.294802	2.18314	2.37747	1.52761	2.81359	3.24895
636							0.90922	3.07019	2.70269	0.293647	3.70648	2.88768
638							0.62651	1.3802	2.6071	1.68337	3.22957	2.80083
640							0.642784	1.82226	3.25287	0.859394	2.09818	2.83649
642							0.170504	2.20331	2.43958	1.6367	3.22097	2.16552
644							-0.47718	2.63043	1.41052	0.970728	1.66451	3.20298
646							1.36384	1.36014	1.77109	1.58427	1.8029	2.33011
648							-0.41933	2.15441	1.5136	1.84449	2.07802	2.67925
650							0.284261	2.02505	1.89271	1.22176	2.29361	1.57292
652							0.886133	1.36906	1.77979	0.992625	2.07987	1.7047
654							-0.33724	2.87646	1.69032	0.246697	1.87203	2.30272
656							0.356687	1.38783	2.13666	0.009708	1.846	2.40564
658							0.019522	1.22703	1.75996	-0.05002	1.57135	2.19652
660							-0.46659	0.897393	1.51135	1.60401	1.85725	1.42048
662							-0.25268	1.30036	1.86956	1.1927	1.45815	1.44581
664							0.185529	1.57913	1.81215	0.628844	1.91716	1.5766
666							0.466037	1.73964	0.935903	1.10795	1.18408	1.62639
668							0.95456	2.52844	1.3722	0.846076	1.76095	1.23944
670							0.852467	0.752279	1.25882	1.2663	1.65972	1.5813
672							0.190684	1.38421	0.886585	-0.85682	1.3948	1.58783
674							0.16678	1.74115	1.51868	-0.23934	1.51863	1.48854
676							0.349162	0.858856	0.458056	1.4194	1.74597	1.67247
678							0.26755	1.4297	1.2892	-0.92781	0.892698	1.39375
680							-0.22043	1.78407	0.900569	0.560851	0.427813	0.827209
682							0.947848	1.77441	1.13617	0.25455	1.05944	1.0139
684							-0.01638	1.48909	1.10062	-0.56176	1.24507	1.22696
686							-0.10406	0.863002	0.895458	-0.05831	0.578557	1.56999
688							1.85244	0.581292	1.30066	0.017381	1.00257	0.638746
690							0.321191	1.33256	1.43043	0.188599	0.77067	0.244642
692							0.672326	1.2235	1.06757	-0.27974	0.770804	0.532656
694							1.03407	0.230774	0.714381	0.735308	1.15534	0.717404
696							1.02505	0.706554	0.230644	-0.84269	0.501578	1.10317
698							1.01312	0.914268	1.23809	0.195661	0.75944	0.598235
700							0.574981	1.06703	0.807214	0.190003	0.257139	0.528755
702							0.802256	0.906728	0.550837	-0.14199	1.02148	0.839948
704							-0.11878	0.602098	0.788733	-0.75277	0.395632	0.223675
706							0.185669	0.17709	0.247772	-0.4669	1.14938	-0.02611
708							-0.35263	0.185571	0.848707	-0.25352	0.719015	0.535354
710							-0.42692	1.25545	0.422782	-0.39851	1.11653	0.394253
712							-0.25945	0.504685	0.512915	0.306681	-0.00842	0.193031
714							-0.27088	0.077495	0.150699	0.691987	0.662852	0.694432
716							-0.10613	-0.07158	0.851848	0.496751	0.391108	0.700239
718							0.229171	0.519088	0.18547	0.130619	0.121235	0.562283
720							-0.31923	0.234159	0.73053	0.336061	0.14015	0.614722
722							0.455191	0.519306	0.421134	0.388163	0.86686	0.132836
724							0.150441	0.304496	0.222165	-0.20636	0.83096	0.826666
726							0.28427	0.279415	0.43787	0.226725	0.64143	0.58935
728							0.243378	0.19995	0.213947	0.613314	0.248585	0.536949
730							0.545281	0.301433	-0.16787	-0.29927	-0.01201	0.317597
732							0.367883	0.228756	0.487589	0.441066	0.141467	0.289469
734							0.403891	0.359722	0.51818	0.285265	0.666088	0.431313
736							-0.09192	-0.21098	0.733212	-0.0432	0.201851	0.206183
738							0.069541	0.359647	0.23898	-0.14394	0.264888	0.091771
740							0.079611	0.367285	0.099405	0.053249	0.58276	0.359233
742							0.383412	0.541557	0.342303	1.38431	0.002898	0.159622
744							0.133624	0.349502	0.197694	-0.78501	0.395445	0.497293
746							-0.40661	0.334859	-0.1809	0.170518	0.168895	0.048146
748							-0.19025	-0.07478	0.133057	-0.07571	0.020776	0.184445
750							-0.04188	-0.08174	0.109254	-0.0293	0.265063	-0.27209
