# Supplementary material for: Optical tools for visualizing and controlling human GLP-1 receptor activation with high spatiotemporal resolution
Source: eLife. 2023 Jun 2;12:RP86628. doi: 10.7554/eLife.86628 (PMC10262203; doi:10.7554/eLife.86628)
Supplement: Figure 2—figure supplement 1—source data 1. [file elife-86628-fig2-figsupp1-data1.xlsx]

## Sheet: Panel b (quantification GLUTAG)
HEK	HEK + GLUTAG
69.09	50.9923
80.0891	53.7027
54.2359	41.2356
53.9381	33.7767
76.9209	34.2093
89.438	27.9868
53.9868	82.8934
106.513	89.1107
78.1558	40.131
50.9614	61.2156
61.7677	57.106
65.2723	57.4899
69.7789	27.5189
124.997	53.1371
112.494	26.0626
131.15	46.6829
70.2457	62.9209
88.9426	31.1318
158.374	41.4491
125.475	67.3348
154.052	38.2398
118.037	38.5476
109.339	43.6847
121.536	39.5233
163.763	47.7338
146.728	39.0639
143.595	42.1267
127.047	41.6849
113.146	11.5374
100.183	33.2739
57.9075	46.2459
122.838	33.0875
	31.3879
	23.5502
	22.5383
	30.164
	30.8492
	39.578
	29.7041
	78.4525
	32.005
	63.0201
	54.1081
