# Supplementary material for: Optical tools for visualizing and controlling human GLP-1 receptor activation with high spatiotemporal resolution
Source: eLife. 2023 Jun 2;12:RP86628. doi: 10.7554/eLife.86628 (PMC10262203; doi:10.7554/eLife.86628)
Supplement: Figure 2—source data 1. [file elife-86628-fig2-data1.xlsx]

## Sheet: Panel a (specificity)
GLP-1 (7-37)	HBSS	Liraglutide	Semaglutide	Glucagon	GLP-1(7-37)+Exendin9	GLP2 (100nM)	Exendin9 (10uM)	CRF	PTH	PACAP-38	VIP	GIP
679.591	-1.54203	536.147	482.297	362.352	235.29	4.7737	3.91129	-1.58107	5.08629	-4.24566	-2.06949	-8.43639
715.723	-4.96456	436.378	505.194	232.539	146.381	3.62895	-1.82063	-8.92707	-5.979	-1.34158	-4.59292	-8.36893
524.881	-1.53841	565.091	382.193	106.826	35.8767	-4.77507	0.459985	3.11246	2.86997	-7.46173	-0.62118	-11.0377
610.056	0.0339	439.085	605.225	233.009	149.957	-5.63692	-2.2301	-2.14296	4.69078	1.43853	3.41459	-0.8847
583.727	0.727474	382.44	323.967	98.753	308.279	19.4648	1.3102	-8.44343	1.52771	-13.0769	-2.76567	15.226
587.348	-1.03365	383.779	602.977	251.702	39.4183	-10.7683	2.50546	-3.46446	3.21669	-2.83811	-0.66792	-1.66034
514.375	1.58185	311.858	302.053	443.644	136.821	-6.40297	-2.14981	-1.70192	-0.89969	10.7816	-5.31957	0.654809
802.357	2.26259	486.451	539.538	119.098	243.291	-7.52719	5.2038	-1.30541	1.96208	-9.2811	9.8827	13.5234
333.044	-2.92349	372.741	516.87	509.255	148.907	16.3279	-1.26893	-8.2767	1.22303	17.1141	-0.21447	3.61895
474.559	-2.49384	488.416	485.961	162.721	286.172	-0.94742	9.36167	-1.80816	-10.7966	4.50214	-1.59842	-1.14951
			491.289		216.656
454.891	4.8721	575.251		336.813		28.2379	3.6416	1.13708	1.30817	-2.91008	2.66119	7.86099
480.847	-2.31263	450.235	545.221	608.856	286.113	18.3027	-0.09926	10.3081	-6.06937	-1.5706	12.5168	-11.9145
421.805	-2.95663	645.053	634.407	462.335	255.883	7.23904	2.24628	-0.18976	-0.32251	-5.93074	-2.23961	-8.56147
429.598	0.429724	545.438	328.79	529.512	370.603	3.28633	-1.09753	1.08163	-0.22076	-5.92452	0.554075	10.7956
419.259	2.75742	365.228	658.082	248.076	138.16	0.988664	-0.75819	-4.78012	-0.33263	-0.26183	5.65855	2.8255
635.532	-3.30927	523.035	449.156	595.676	175.734	8.51508	0.995275	-2.48001	3.33002	-4.54298	-2.11494	-0.29268
484.149	2.03648	614.452	433.952	558.958	249.59	0.620876	-1.86378	7.80253	-2.28742	-5.17591	-1.53382	1.83445
473.031	0.058466	430.935	541.872	504.889	274.625	-0.98142	-2.71252	-2.82621	2.65396	-4.80746	3.73692	7.3191
431.596	0.064894	543.292	460.094	553.912	92.6447	16.6521	-0.63388	-0.91945	-3.67815	-10.3478	2.70827	8.30016
437.892	-2.32876	644.218	375.463	408.145	266.546	7.62013	0.875508	-6.84799	-1.95696	-12.6452	0.062072	-6.4699
			353.374		297.525							-9.51406
495.42	-2.72476	478.701		167.553		-0.14855	2.67999	-4.00611	-0.5393	0.989708	-1.60344
582.515	-0.32462	437.785		477.644	276.95	-8.63685	-1.46997	0.267301	-1.82439	2.18247	2.98398
465.168	5.1694	510.429	508.69	154.727	268.402	10.6865	5.93904	0.267301	-3.57505	0.989708	-1.07078	12.1837
460.847	-0.56575	492.087	372.084	106.355	289.196	-3.60417	6.52337	-3.75485	-1.66556	0.343545	2.92457	-2.85898
280.825	-3.34094	402.007	482.124	120.726	296.437	-1.63983	-2.58231	2.42489	-0.91918	-3.35974	-5.67644	6.84465
598.699	-2.13282	309.372	475.911	279.522	255.481	3.9678	1.2266	3.56985	-1.25489	-0.46169	1.76405	-5.42078
573.786	1.46369	505.114	325.718	323.656	185.063	0.283905	0.133281	-6.00365	-2.32728	-1.45716	-1.55659	0.024119
618.194	-0.15723	549.882	472.169	436.366	269.423	11.12	-0.90616	-3.47609	-0.90457	0.247363	3.46733	-5.10992
623.551	-0.72218	355.08	433.571	110.93	226.892	-13.7849	6.45873	-3.65894	-2.22319	0.905636	-2.11397	-6.14624
648.954	-2.36858	386.975	365.035	230.293	289.853	2.36216	-2.27123	-1.70666	-5.9927		2.97641	-1.53487
			551.838									0.560999

## Sheet: Panel b (reversibility)
Time (s)	GLPLight3
0	-3.96221	-0.3641	6.83116	0.182331	0.381703	5.70302	-9.69074	4.47151	4.63387	0.865757	-0.92413	0.13675	-2.82657	0.250314	-13.5071	-2.44556	-4.73883	1.83653	-9.09324	-5.18539	-7.66951	-7.04294	-4.12513	-4.87067	-5.16764	-9.18889	-0.92115	-13.764	-5.20369	-6.92805
1.27	-3.0015	0.381165	5.20079	-0.32305	0.313512	5.95361	-9.3356	2.01002	3.58094	-1.03202	-0.12847	-2.17678	-1.69092	2.1704	-6.85595	-1.56097	2.50656	1.26517	-6.5209	-6.90409	-5.97708	-3.01729	-8.84529	-3.52688	-1.73542	-6.97458	-0.67038	-10.9092	-4.28814	-2.01856
2.54	-3.87963	-2.341	6.1285	0.198184	-1.10397	4.95587	-12.8106	2.93302	2.12122	-1.12233	0.539548	-1.32428	-5.67312	-2.8475	-7.01915	-0.61374	-1.38993	2.61253	-12.0291	1.24776	-6.23962	-2.86445	-7.81386	-3.36048	-3.53229	-2.59898	-0.0239	-10.8953	-4.79604	-2.77335
3.81	-1.45336	2.17254	3.64599	0.866604	0.69875	3.7532	-6.01001	2.28806	2.44163	-1.47249	-1.51434	-1.58174	-3.28713	-2.92502	-2.73619	-5.02593	-1.85989	1.51692	-6.91502	-8.1884	-8.29077	-3.97771	-6.12526	-4.02676	-0.67835	-4.67768	1.9903	-5.50113	-2.79749	-3.83807
5.08	-1.64483	-0.89487	3.37982	-0.31434	-0.31094	3.42233	-8.50107	-0.50682	2.51342	-2.81372	-0.40109	0.136962	-2.84508	-0.13007	-6.79371	-1.20344	-1.94976	1.63565	-3.82196	-6.04082	-15.7978	-2.56343	-4.14579	-3.52317	0.252361	-2.63523	0.690549	-8.01708	-2.33972	-3.68216
6.35	-0.50594	-1.55083	2.57122	-0.00095	-1.88333	1.52877	-2.81898	1.3216	0.703522	-0.19225	-0.95249	-1.29646	-3.25755	-0.27131	-1.64033	-4.11191	1.35733	0.703994	-0.11028	1.12523	-10.0385	-2.63015	-6.17386	-2.71469	-1.13491	-0.90834	1.7914	-6.69498	0.99534	-4.25061
7.62	-0.59611	-2.65147	1.77457	0.18182	0.720125	0.820908	-4.0521	0.759334	1.20357	-1.67251	3.17917	2.86283	-1.16092	1.69783	-3.47036	-2.49343	0.964199	1.51075	-5.17908	-5.59975	-7.94919	0.200605	-3.86799	-1.63643	-0.93388	-1.44344	-0.37204	-2.37885	-2.83485	-0.44288
8.89	-1.57148	-1.2108	0.045422	0.651413	-0.87084	1.08563	0.146075	3.27226	-0.13367	1.60411	0.085928	4.56907	-3.32363	2.281	-3.27579	-1.9115	1.80095	-1.47123	-6.93543	-2.94983	-11.3247	0.767025	-3.55247	-1.56329	-3.22885	-1.88732	1.66956	-6.29563	-0.11545	-1.44015
10.16	-0.7687	-0.84638	0.092296	-0.54055	0.058716	-0.49971	-1.36859	1.54217	-1.15903	0.429877	2.54735	1.62332	-1.89436	1.3919	-4.72452	0.094602	-3.56841	1.04703	-7.56106	-0.7375	-7.9608	-0.05643	2.34966	0.618078	0.845021	0.125129	-3.14593	-1.85156	1.32244	-0.16228
11.43	-3.14177	1.86803	-0.11325	-0.0589	1.77251	-0.39665	-1.06963	0.615428	0.832307	-0.46364	-3.44899	1.2415	-1.29787	3.70617	0.842503	0.550978	1.20882	2.22051	-2.12556	-5.43743	-4.26143	-0.96167	1.07922	0.3369	0.312009	2.30198	0.192576	1.28888	0.885006	0.312584
12.7	-0.24766	0.310109	-0.71321	0.294382	-0.35922	-1.97819	1.98533	0.030216	0.374207	1.34353	2.08272	-1.99325	1.07703	-2.38455	-1.15269	3.73386	2.2625	2.86571	0.790215	-4.54396	2.47625	0.801809	2.31049	1.68568	0.83616	2.15284	0.887475	3.66322	0.102868	3.29727
13.97	-0.99513	-1.20386	-3.21282	0.417597	1.06218	-1.35209	2.71964	-5.46675	-2.96678	-2.00238	-0.5375	2.42558	2.03282	-3.27146	-0.33226	2.71052	2.37462	1.59077	5.17535	0.432401	-0.90198	1.46522	1.33817	2.0198	1.85062	2.87729	-0.65526	4.16241	1.23985	2.47691
15.24	1.89569	1.80645	-2.66385	0.361369	1.83559	-1.98881	5.94691	0.537132	-1.49029	-3.92873	1.65037	-2.31486	0.222092	0.956993	4.52607	0.238992	3.36286	-1.29797	4.59054	3.31839	2.2325	1.08376	1.39365	2.45422	2.2935	0.831868	-0.44015	5.82657	1.78907	2.65706
16.51	2.48622	2.61463	-2.82145	-0.01166	0.58773	-0.79587	4.77747	-1.70037	-2.55674	3.28055	-0.45894	0.453377	4.66729	2.0399	7.15741	2.05896	-1.39808	-1.25023	11.1242	2.90346	9.39356	2.83453	1.20507	1.77452	1.69462	2.60526	-1.18308	4.0236	1.2538	0.069425
17.78	3.52692	-0.06132	-2.82322	0.656567	0.4239	-1.89363	5.94521	0.999931	1.02	-0.82726	-0.84034	0.258213	3.79283	-2.30375	-0.61505	1.73425	3.51761	0.278978	12.8321	1.90284	1.18509	-0.27919	5.26555	0.445077	1.7461	2.33461	-0.03157	4.73597	0.093315	2.23389
19.05	2.08328	0.818084	-2.52561	0.333946	-1.49592	-3.6324	8.68308	-0.1106	-1.29828	1.13033	0.134814	-0.17178	1.35632	-1.31852	9.36922	1.01124	5.07654	-1.79191	4.23882	6.60916	12.2655	3.95098	7.21237	2.88082	-1.49334	4.15378	0.325826	4.48831	2.08171	3.44766
20.32	2.63088	-2.42893	-2.65261	-0.43493	-2.55354	-3.31333	6.94704	0.495782	-2.52461	-0.30981	-1.62387	-0.1587	1.99846	1.72827	10.2499	0.120046	0.729089	-2.66983	4.63741	3.85209	10.8152	1.91592	1.57644	1.89348	1.5726	2.10861	0.451494	8.41596	1.58218	1.71351
21.59	4.24817	0.49235	-2.86951	-1.15138	2.16612	-3.48972	1.17333	-0.8446	-4.42039	1.66822	-0.52033	-0.11489	5.29094	-0.50717	4.7231	1.74872	-2.45664	-4.61216	8.43073	8.7701	15.6255	3.46333	8.45489	2.6395	1.19941	2.27706	-0.52032	9.88992	3.8722	3.5104
22.86	2.78571	0.365843	-4.44945	0.033714	-0.42594	-3.85562	8.15703	-5.26522	-1.36907	4.33277	-1.06053	-1.10919	5.64159	2.43735	7.23681	2.43561	-1.03835	-2.74752	1.64097	10.8355	14.9059	1.60051	7.77343	3.46698	3.936	3.58136	0.672371	11.2188	3.59517	1.52205
24.13	2.11146	2.72437	-4.8248	-1.34217	-1.01714	-4.02732	9.17619	-7.3821	-1.50583	1.182	2.19113	-1.46568	1.17778	-2.70077	8.01803	2.9287	-6.76119	-3.2437	6.83125	4.59022	17.5119	5.30958	4.6907	5.0073	1.36629	4.96466	-0.70777	8.59405	3.56243	4.29535
25.4	1.67222	0.371405	-5.52835	-1.32912	-0.45626	-3.48593	5.84559	-4.58282	-2.63399	-2.65293	-2.28891	1.1321	2.93047	0.8775	10.8714	0.834902	0.190166	-5.38379	6.97762	8.00671	10.0447	0.65046	6.38874	4.22818	1.40027	3.22238	0.932492	9.64583	1.60215	6.89806
26.67	31.9861	38.5058	-2.29597	7.11782	21.7357	-3.15202	39.0214	-5.13988	-0.13539	45.8192	1.42813	0.062213	2.73944	4.60095	10.1348	6.93451	-0.93464	-4.1741	8.85961	8.9841	18.3952	2.32379	8.01678	2.52833	1.35602	2.5378	0.736866	11.4904	0.182399	6.99688
27.94	128.412	127.095	16.5553	49.8712	107.785	10.137	123.82	52.8325	28.2106	116.085	27.0279	-2.75792	0.206435	-1.4775	9.92205	4.88849	1.59814	-2.21388	-2.17371	13.8321	19.6554	7.90554	7.49235	4.45755	10.3289	6.73189	3.39694	17.928	1.53201	16.2835
29.21	206.356	201.897	34.672	92.7662	183.713	24.7675	205.548	126.256	63.6918	195.098	73.6831	7.31944	22.8635	29.3543	13.763	24.0447	34.0975	-2.67305	28.233	32.9928	48.7623	54.4955	42.0818	25.5521	35.363	26.046	23.8418	60.1275	34.609	62.0788
30.48	266.243	254.898	51.4474	132.341	252.568	40.5125	269.036	193.222	100.532	253.094	121.212	37.0343	63.6268	61.1252	46.5676	75.6385	74.9556	19.1672	68.4642	78.648	79.6716	109.249	80.5943	61.8745	83.6434	57.3563	59.9241	108.61	71.6361	126.805
31.75	307.72	300.022	66.708	167.469	313.563	53.3497	307.745	252.271	135.568	307.053	167.048	72.0415	105.084	98.662	100.216	117.246	110.05	56.0961	124.587	120.26	116.604	171.584	147.98	100.87	137.068	99.1311	100.785	164.951	117.58	184.083
33.02	344.822	328.819	76.7664	196.135	359.203	64.1731	336.322	302.035	162.271	346.606	211.584	109.446	149.533	131.257	131.016	160.602	151.208	94.0248	171.704	163.296	159.68	218.487	185.152	140.379	190.897	140.297	132.74	214.694	159.827	243.552
34.29	367.532	355.26	85.9412	219.431	392.141	72.4611	371.74	341.015	194.793	388.772	255.85	144.529	180.241	168.996	175.168	204.478	188.132	137.704	222.525	193.372	195.952	267.945	239.909	185.573	234.818	182.516	162.569	270.53	204.006	290.943
35.56	387.6	379.298	91.8154	240.763	417.911	80.38	388.844	371.866	216.1	411.577	292.428	183.313	216.54	203.975	213.613	235.615	224.42	178.52	259.219	224.955	224.454	313.705	284.228	223.09	285.012	222.692	189.693	311.97	234.461	335.844
36.83	403.302	386.094	99.0351	257.776	441.507	87.1217	410.658	393.015	235.922	433.537	323.742	201.253	242.704	219.48	251.433	265.86	250.602	213.426	279.583	248.166	273.851	356.828	341.476	262.454	322.565	258.882	214.557	335.661	270.036	374.264
38.1	412.839	406.552	102.544	269.82	460.207	92.9448	429.036	410.356	251.503	445.118	348.046	234.622	263.644	261.64	275.3	290.061	273.878	251.099	317.388	268.794	290.547	383.051	362.629	292.96	355.392	289.172	238.04	376.066	305.588	395.136
39.37	421.171	416.046	104.429	284.786	472.414	94.0635	428.422	435.221	265.285	462.686	363.987	245.065	292.868	287.778	312.667	314.37	301.144	277.681	360.815	293.525	326.938	408.54	403.291	325.592	380.504	325.711	254.977	403.27	319.2	433.528
40.64	432.133	421.392	107.125	293.576	481.58	95.919	445.784	448.22	278.443	478.92	389.8	272.164	319.256	312.958	330.21	332.162	316.623	306.634	382.597	322.243	345.399	428.342	438.887	353.058	404.56	355.613	263.881	418.68	345.221	431.786
41.91	434.658	429.715	106.609	303.271	485.547	99.2555	457.53	450.68	291.794	492.408	418.072	293.262	330.315	327.407	349.142	359.671	350.603	325.094	407.97	337.377	375.355	443.647	468.038	380.065	424.418	380.842	279.13	442.505	364.547	465.447
43.18	438.833	437.974	110.493	307.131	498.882	102.128	463.565	464.071	297.594	496.077	419.645	311.559	349.888	339.683	371.692	383.401	366.432	344.527	419.405	346.16	392.205	467.12	506.813	401.255	435.405	400.612	284.703	468.879	374.019	468.233
44.45	450.125	440.498	111.952	312.119	506.691	102.659	460.825	483.655	302.573	498.006	434.847	324.355	365.169	374.817	376.192	398.812	363.757	360.251	436.786	357.192	389.245	476.962	512.428	420.759	454.196	417.085	297.788	482.29	390.266	480.563
45.72	443.757	448.29	112.43	317.247	510.956	105.331	485.919	488.349	310.613	512.172	449.856	336.334	375.466	386.225	407.437	405.476	390.953	373.229	440.627	384.318	409.355	476.817	544.085	437.118	464.719	439.921	302.976	491.485	403.565	497.489
46.99	446.904	446.77	111.728	320.684	509.408	104.094	487.724	484.952	314.322	522.617	460.702	359.458	391.711	401.208	427.153	426.854	409.944	383.904	457.895	390.378	434.971	489.227	570.728	450.406	478.071	458.289	310.103	498.418	416.357	501.373
48.26	448.185	444.008	112.101	324.834	518.637	106.496	488.784	490.724	314.284	512.905	462.97	364.616	410.747	409.805	425.737	437.773	408.854	396.3	470.681	395.464	448.599	496.688	576.643	464.109	471.305	465.559	310.878	510.048	422.314	513.774
49.53	448.938	446.089	111.543	326.197	512.322	105.955	484.495	496.358	318.114	526.562	465.51	375.054	406.086	417.767	426.805	448.988	432.038	402.359	479.485	414.34	453.233	505.685	586.463	472.78	485.617	475.797	322.995	522.52	426.475	519.431
50.8	455.377	454.975	113.416	331.769	520.35	107.736	498.326	516.785	328.335	530.856	476.652	377.791	420.39	432.8	435.85	463.312	435.933	417.262	488.509	419.612	477.162	506.204	588.092	482.996	490.003	493.479	324.031	522.054	441.399	532.083
52.07	447.683	454.472	111.382	328.928	524.468	105.758	489.477	505.374	321.534	530.114	468.286	392.492	436.464	440.458	455.944	470.052	451.512	422.044	496.677	438.663	485.148	508.452	604.02	490.097	499.045	497.246	326.227	533.096	446.253	537.319
53.34	445.998	451.859	111.018	329.563	521.966	106.625	489.583	503.893	324.227	531.111	479.02	396.791	439.294	456.409	438.939	484.268	452.782	430.794	505.871	455.063	507.032	518.873	593.226	498.146	511.829	508.771	326.489	534.417	449.556	536.56
54.61	445.361	451.989	108.099	329.13	519.686	105.21	487.741	492.821	328.202	523.013	486.103	407.223	445.368	465.11	440.962	488.208	452.027	425.51	510.338	449.925	521.703	507.071	621.099	499.92	511.238	509.32	331.773	536.812	452.055	531.49
55.88	441.997	452.682	107.737	330.193	516.747	103.512	489.089	493.662	330.661	527.524	493.103	402.836	447.227	465.551	466.762	498.819	468.392	432.444	517.222	453.493	526.687	514.422	608.382	501.668	516.161	510.769	330.928	541.224	458.965	542.055
57.15	444.562	444.656	107.853	326.843	523.435	102.588	486.005	498.014	327.519	529.642	490.521	414.682	466.949	470.644	483.019	506.41	466.21	441.175	527.62	458.804	518.119	518.203	606.247	516.532	515.526	522.263	335.908	542.632	461.485	551.139
58.42	441.077	446.153	109.328	329.134	522.178	102.176	488.29	492.732	329.761	535.179	487.895	416.631	464.167	475.365	475.541	515.607	469.839	434.136	541.659	463.459	544.984	525.956	614.481	523.26	522.889	526.891	344.908	560.395	472.586	567.813
59.69	442.993	444.968	108.843	330.575	524.083	105.193	485.33	496.5	325.388	539.206	479.702	417.769	462.336	482.944	488.826	521.13	472.456	440.905	535.314	466.441	544.152	518.712	610.104	517.948	526.153	528.317	333.5	545.545	469.885	558.495
60.96	451.113	446.794	110.802	330.838	523.896	104.936	484.639	509.304	331.678	532.968	486.155	417.354	467.89	495.065	478.857	536.837	471.97	445.37	550.279	471.466	542.832	532.722	610.836	523.505	524.789	532.613	339.223	547.314	466.111	548.026
62.23	449.084	452.365	111.315	330.804	520.337	104.826	485.601	497.944	330.21	523.218	475.013	430.642	468.434	501.324	475.062	539.769	479.004	455.298	541.318	460.71	557.856	530.462	618.228	523.13	524.304	529.262	336.539	541.543	480.004	563.655
63.5	438.155	445.33	110.435	332.131	513.476	104.323	480.476	493.786	333.205	534.569	491.269	422.231	471.152	511.027	484.904	540.08	489.326	456.334	545.575	464.771	567.94	530.64	602.919	519.736	521.936	535.532	342.944	551.047	477.177	555.639
64.77	446.795	447.104	111.83	333.013	515.571	104.644	480.143	504.337	332.725	528.609	484.775	446.626	474.452	512.395	504.858	556.098	494.098	468.413	555.701	460.155	573.798	528.765	598.35	521.798	524.019	539.289	343.591	554.944	476.062	558.367
66.04	446.143	446.53	112.727	332.995	510.324	103.617	484.463	498.375	333.697	530.208	480.799	433.167	478.445	510.377	492.643	568.325	494.195	473.839	568.477	475.24	580.64	531.026	612.008	520.03	535.387	535.972	343.286	557.743	477.801	546.671
67.31	447.26	443.323	112.982	334.479	517.717	102.71	480.746	497.555	327.51	521.917	488.514	461.198	485.877	526.976	521.566	583.916	505.365	473.463	560.74	490.138	598.139	537.334	601.704	523.1	533.043	534.41	340.831	547.772	488.772	557.545
68.58	440.979	444.283	115.254	329.484	516.673	104.396	487.837	494.524	329.719	523.375	487.904	440.337	484.932	522.579	509.98	570.688	506.496	475.621	551.707	482.12	574.113	534.964	598.181	518.379	534.899	533.692	339.871	543.639	484.628	554.586
69.85	440.742	448.111	110.668	331.416	515.343	103.473	478.568	497.244	328.282	527.488	477.889	448.045	479.108	525.577	509.397	576.926	504.005	470.178	538.856	479.083	588.921	537.874	606.335	522.442	530.417	540.188	339.134	533.797	484.925	555.472
71.12	439.294	444.798	110.708	328.208	505.984	100.403	479.331	495.909	330.828	526.881	479.228	445.157	486.284	530.447	515.788	567.972	509.373	473.251	552.27	494.53	579.944	540.926	597.28	522.631	531.148	538.164	337.695	529.03	482.463	546.029
72.39	439.584	441.194	108.848	327.977	512.589	101.826	475.964	486.725	333.44	518.748	477.129	441.053	477.966	537.295	506.694	571.853	518.616	462.552	544.394	483.77	588.524	521.99	600.366	524.286	533.283	540.15	334.904	548.818	489.323	555.995
73.66	439.082	442.446	108.412	326.163	513.594	99.3741	475.389	489.925	323	522.794	472.167	455.953	485.265	532.668	523.332	581.732	518.152	470.468	549.605	494.468	590.829	533.491	596.452	520.931	525.241	540.046	335.162	532.173	485.71	557.816
74.93	434.076	437.479	106.045	326.53	503.566	97.5774	474.616	504.447	332.204	517.056	489.12	458.978	477.313	535.946	524.816	582.544	520.741	464.162	564.558	487.43	579.368	526.041	581.18	519.274	532.446	539.169	334.314	517.088	488.204	559.957
76.2	420.945	430.585	104.178	322.976	509.472	94.2538	465.956	503.64	326.939	511.231	470.367	458.292	478.302	528.22	538.973	580.896	520.886	470.48	551.108	495.008	575.229	528.45	606.219	519.536	529.01	543.322	332.286	527.415	488.623	559.819
77.47	427.654	431.464	104.872	323.506	511.663	92.8724	472.012	493.459	330.033	523.972	470.223	446.791	482.064	523.132	539.36	581.481	527.406	470.26	555.977	487.888	599.628	515.297	597.329	519.87	527.757	548.197	334.929	523.425	487.855	560.68
78.74	425.748	427.56	102.427	325.471	515.605	93.55	466.384	504.722	332.181	529.291	484.481	450.367	479.26	540.533	531.539	580.545	516.722	464.573	554.865	488.931	589.147	529.604	585.404	516.764	532.486	544.322	333.419	521.558	484.438	548.432
80.01	424.407	433.777	99.4465	322.878	508.44	91.9738	468.995	486.556	327.97	515.33	484.326	457.322	474.028	533.64	546.642	584.354	510.443	464.798	555.777	482.161	595.621	529.391	594.624	517.422	533.729	543.291	335	523.451	487.242	556.82
81.28	416.256	432.718	97.1213	319.733	503.012	87.6115	457.208	489.661	329.486	515.844	493.793	445.508	473.404	530.084	523.477	591.158	502.333	458.478	539.312	501.796	583.671	526.862	595.067	513.366	523.705	537.148	334.073	508.598	482.373	544.717
82.55	415.615	426.838	96.8068	319.87	505.888	90.2084	458.704	493.772	326.715	515.109	488.128	462.134	479.869	543.987	540.352	592.415	517.108	454.434	549.705	497.17	597.765	526.034	592.17	513.027	517.857	538.938	334.067	523.375	484.133	545.981
83.82	418.048	425.806	94.3483	318.869	503.87	88.7721	460.783	489.584	324.62	522.367	484.322	451.919	466.257	541.448	538.844	583.138	506.637	457.843	535.773	480.148	579.938	529.507	584.912	512.037	525.112	540.688	338.831	515.683	486.885	553.213
85.09	414.66	422.958	92.528	316.647	505.798	87.3702	452.547	490.889	320.163	505.464	482.426	449.985	464.943	530.263	530.111	585.048	514.766	453.799	532.168	481.368	571.406	525.553	596.482	514.316	523.641	535.122	336.384	499.293	491.752	557.97
86.36	410.405	430.16	93.8784	316.815	498.189	87.9076	443.118	479.097	321.856	503.407	485.775	446.347	466.906	523.068	507.237	575.319	502.057	440.33	532.794	470.749	548.477	519.072	583.796	505.643	519.281	536.713	328.065	499.673	485.973	553.602
87.63	410.435	419.9	89.4374	315.728	508.338	86.7106	439.465	490.634	319.99	499.951	479.25	450.347	456.386	518.223	529.281	571.173	502.42	434.312	533.671	457.128	559.507	496.988	571.782	495.546	516.235	528.92	322.5	483.365	483.09	550.351
88.9	408.455	418.498	87.9096	314.844	495.838	86.3787	440.717	473.008	316.34	493.958	481.554	435.895	463.059	520.437	524.342	573.576	494.542	425.677	532.854	461.497	554.372	498.026	568.256	492.876	517.837	525.65	317.012	473.85	486.031	542.382
90.17	398.273	416.908	87.1206	310.151	488.241	84.9394	446.442	478.645	315.583	492.035	482.321	437.795	445.454	512.732	531.135	572.911	500.209	426.475	522.554	453.976	527.811	490.223	570.436	496.008	512.293	523.789	317.416	473.12	480.545	543.625
91.44	392.291	413.885	86.2498	309.139	495.132	82.4025	429.298	476.554	310.192	492.609	470.579	439.825	444.869	514.396	501.157	568.686	481.751	416.853	528.797	460.499	532.956	494.71	577.462	495.192	519.196	524.267	317.558	479.126	480.921	537.359
92.71	388.494	408.764	85.4187	307.673	483.181	81.7754	430.025	475.738	311.559	496.178	475.675	437.823	444.771	509.662	511.372	563.324	489.452	419.321	508.923	463.062	530.088	496.781	560.508	491.187	511.884	522.262	311.559	477.227	478.987	544.866
93.98	392.15	402.669	82.3377	308.688	486.529	80.2485	423.942	466.274	311.927	492.729	467.089	431.37	434.94	501.319	510.52	560.89	485.786	407.296	509.87	455.868	515.421	497.258	571.488	489.946	508.651	521.786	315.073	476.839	476.62	529.303
95.25	383.087	396.087	78.1461	303.076	477.74	78.4359	415.296	465.462	306.44	478.822	465.349	439.43	433.02	496.328	502.782	564.368	472.664	403.832	515.137	446.642	517.393	494.943	555.89	485.653	504.594	511.693	311.761	467.171	476.402	519.402
96.52	372.433	389.545	74.5454	301.721	473.962	74.6211	410.314	454.132	297.522	487.138	459.852	428.437	427.389	496.694	486.111	563.527	481.346	397.837	485.118	443.635	515.462	486.401	556.164	481.35	508.595	509.115	309.777	464.08	474.727	519.932
97.79	378.239	396.363	77.2391	300.498	477.601	76.1004	418.874	458.392	302.303	481.193	458.196	424.552	428.99	487.171	489.782	558.553	471.474	389.649	483.036	430.692	476.375	484.918	553.438	480.123	500.228	516.267	307.573	454.814	469.468	520.696
99.06	375.889	385.137	74.1957	299.871	473.068	76.7878	416.105	460.485	297.57	491.127	452.818	424.3	417.208	503.302	494.216	549.888	473.169	391.981	457.673	450.609	470.763	469.158	540.305	464.402	491.533	512.807	301.368	446.837	465.738	503.03
100.33	372.964	379.836	72.9537	297.25	464.459	74.2594	411.466	448.858	292.182	472.963	449.083	431.036	414.82	495.454	486.947	548.071	462.66	385.16	456.238	443.985	489.24	471.309	554.695	467.988	495.131	503.384	302.108	444.654	462.94	513.854
101.6	363.408	376.89	73.2482	292.067	463.63	71.2326	408.455	446.512	289.429	481.829	447.497	428.51	409.077	488.874	477.449	543.954	474.587	383.678	439.664	438.815	476.265	473.148	554.625	464.772	492.785	500.901	299.368	436.958	463.809	506.363
102.87	361.012	373.008	69.3196	291.271	460.942	70.9623	404	444.082	285.249	475.431	451.996	424.969	411.67	470.561	476.042	535.861	475.263	379.129	438.725	428.868	484.877	475.058	536.488	462.156	483.672	500.555	298.038	437.454	461.455	496.717
104.14	361.277	379.821	70.533	289.728	460.119	71.6467	403.568	437.995	286.34	479.118	433.38	424.687	405.79	478.207	451.535	541.842	476.476	384.881	435.756	407.537	487.336	470.474	538.046	464.462	475.317	499.825	292.862	429.542	457.856	504.742
105.41	356.341	371.363	67.1334	285.159	444.245	69.7713	394.045	437.326	283.218	480.857	440.633	429.387	404.503	457.202	458.315	533.735	463.85	375.721	419.423	413.538	467.511	458.495	548.764	461.293	484.589	494.716	296.663	434.708	453.217	499.878
106.68	355.475	379.241	67.4943	286.859	451.086	71.1828	394.097	432.425	277.802	474.795	448.112	409.471	399.475	461.095	474.676	521.724	476.898	377.29	412.762	407.459	466.702	457.972	528.918	455.621	478.595	497.889	296.117	421.652	455.155	488.523
107.95	348.987	368.41	66.5282	283.635	438.803	69.3529	401.116	427.472	278.157	471.599	447.159	421.242	393.452	457.971	435.151	520.874	458.191	365.251	399.856	406.401	448.741	472.908	545.418	457.348	478.701	494.516	295.234	435.864	453.156	487.996
109.22	348.094	367.787	65.1812	282.718	447.246	68.4231	391.879	424.845	277.469	474.857	437.157	424.613	394.443	456.267	450.21	516.808	460.201	363.646	398.214	408.127	483.002	458.862	524.044	453.927	480.3	496.112	292.775	426.65	444.075	486.235
110.49	348.608	367.799	62.7729	278.425	429.707	67.8324	380.829	420.646	270.489	475.123	439.181	417.09	396.751	449.364	458.52	516.009	449.711	362.813	406.389	414.17	448.236	455.814	528.794	444.943	475.823	491.567	285.461	424.483	441.759	477.617
111.76	337.598	362.626	57.9896	272.906	422.485	65.1774	384.388	418.956	275.524	474.204	437.201	410.697	383.887	447.366	447.499	503.538	463.507	360.19	389.446	407.002	438.803	447.702	538.516	449.22	476.487	481.996	288.559	421.724	444.537	480.781
113.03	331.052	363.221	59.0238	269.681	421.71	62.6299	366.832	414.316	268.273	470.403	429.079	410.065	393.505	455.881	447.818	509.7	449.848	356.09	393.521	408.504	439.412	446.452	521.556	442.998	471.305	486.141	286.023	418.914	440.46	480.985
114.3	335.984	360.71	59.3104	269.76	422.982	63.721	366.25	409.419	268.846	474.597	421.265	414.491	390.145	433.564	462.279	510.946	454.316	355.501	383.672	392.502	415.263	434.759	515.84	442.111	467.2	481.22	282.652	406.509	441.46	475.857
115.57	326.432	363.039	57.8759	268.659	425.281	63.6729	364.686	398.082	268.659	474.803	432.3	418.573	378.142	450.52	463.004	510.525	445.668	355.44	392.119	390.865	403.471	441.139	516.072	435.413	462.246	478.931	285.1	414.537	439.609	466.31
116.84	332.447	370.083	59.9041	268.469	426.374	63.9883	367.408	410.231	264.704	468.076	424.213	413.222	388.002	435.817	459.85	506.705	427.65	359.871	384.161	387.906	414.444	435.817	524.442	433.409	459.118	475.347	284.133	407.004	432.738	463.344
118.11	326.385	369.161	57.7444	265.349	420.453	63.672	354.306	409.613	263.506	463.645	426.686	404.425	387.209	439.037	451.27	502.789	438.749	360.964	382.426	389.1	394.631	425.434	534.781	433.185	451.944	471.857	278.433	407.046	429.164	450.929
119.38	325.636	367.411	58.2385	262.43	414.503	62.6942	359.021	402.507	265.449	475.53	415.746	409.717	379.414	435.117	456.342	506.18	429.791	350.546	370.596	397.017	401.579	431.132	524.107	433.871	455.76	466.791	274.609	396.497	425.39	450.53
120.65	323.503	364.47	57.5849	261.673	412.014	63.2332	347.93	402.97	259.156	474.349	414.184	411.773	378.327	423.52	447.934	504.949	429.136	343.21	369.899	391.075	388.86	409.895	502.654	422.428	446.319	463.214	270.082	379.945	422.332	448.433
121.92	320.438	368.02	56.1258	258.97	407.752	61.6517	346.016	401.533	262.086	452.732	410.745	408.093	376.514	425.062	448.461	490.466	434.879	347.965	377.565	385.202	383.632	413.367	507.313	414.475	444.127	461.91	267.564	376.258	419.194	443.005
123.19	319.938	367.632	57.3934	258.04	407.313	63.4535	344.828	392.731	258.063	464.006	408.736	406.875	371.882	424.268	443.583	500.875	437.959	352.844	373.735	389.832	376.824	411.829	502.433	411.933	438.592	459.793	263.667	371.943	418.494	439.655
124.46	321.264	365.163	54.7417	258.731	408.199	61.7362	338.133	400.868	260.04	458.289	407.819	403.907	372.803	412.096	456.705	498.547	426.166	354.723	362.728	376.911	380.773	404.363	503.787	411.251	446.405	460.841	265.096	374.603	413.959	445.362
125.73	312.911	366.549	53.7218	253.514	406.155	61.4586	329.941	386.324	256.211	455.149	401.972	400.433	368.828	418.101	438.529	498.05	428.893	347.671	365.111	369.773	382.428	399.695	493.745	406.102	434.413	450.903	258.12	363.655	408.094	434.025
127	311.387	360.054	50.9446	248.34	402.143	61.2392	326.731	386.818	255.112	451.847	403.085	396.858	367.606	401.397	438.923	491.886	426.482	343.607	364.705	372.185	363.69	410.318	496.688	404.855	432.439	446.561	258.693	361.222	415.279	435.036
128.27	311.329	358.217	52.3992	248.118	393.278	59.7483	322.356	383.417	253.022	446.405	394.602	403.987	369.507	410.366	432.678	496.447	429.566	338.248	353.947	370.199	359.745	398.612	499.732	397.901	426.626	447.779	253.84	356.304	402.436	436.413
129.54	301.311	349.323	47.7196	244.243	393.676	59.6171	321.401	385.882	251.73	452.964	393.184	396.087	361.333	419.018	450.261	495.319	432.743	347.514	353.172	373.48	361.893	395.303	489.503	398.447	428.132	446.538	254.953	355.083	405.798	425.521
130.81	302.795	349.998	50.3113	242.831	385.764	57.5772	314.132	385.519	250.32	445.203	380.392	393.907	368.238	415.859	450.276	492.035	421.109	349.028	339.274	368.474	342.94	390.132	488.374	399.738	430.524	447.789	253.299	349.228	403.329	426.662
132.08	302.43	347.738	46.8323	238.333	387.256	57.1897	317.47	374.157	248.562	438.543	393.563	399.686	354.95	405.744	451.548	491.55	428.771	342.2	358.411	374.033	352.376	396.392	489.047	396.536	429.303	438.839	250.35	356.228	403.177	428.399
133.35	298.708	342.943	47.3553	234.933	385.963	55.2222	308.647	367.118	240.972	442.874	376.233	385.856	352.163	396.267	441.895	483.156	427.795	345.049	349.199	353.23	344.234	385.573	493.067	396.582	428.384	444.804	247.538	354.441	397.948	425.263
134.62	296.351	340.28	44.5886	230.85	379.539	54.0322	304.45	366.748	238.695	434.736	372.605	391.671	362.455	406.929	433.218	483.041	436.549	338.272	339.361	366.733	348.261	401.794	481.403	387.063	422.958	439.904	249.462	346.099	389.319	426.816
135.89	298.731	342.046	45.9302	232.442	386.682	53.2519	304.843	361.732	239.966	428.153	367.06	387.152	350.293	402.525	436.978	477.782	414.875	336.666	336.98	354.118	338.592	399.394	490.418	391.907	423.398	435.817	246.798	338.953	394.481	424.449
137.16	289.375	340.567	46.449	229.588	381.653	54.8648	307.17	363.317	239.871	437.642	365.622	386.9	353.774	403.227	452.33	472.703	438.082	339.508	329.632	349.211	329.818	397.697	490.493	394.079	433.653	435.928	248.731	347.959	397.614	419.485
138.43	288.499	337.927	44.4714	230.434	377.24	53.5781	304.11	365.008	236.479	434.447	361.72	384.409	355.249	401.181	424.221	475.69	426.047	338.596	336.943	358.104	358.334	381.413	495.525	388.07	422.595	430.897	242.406	333.339	391.459	428.94
139.7	291.312	333.118	44.8498	227.429	386.457	53.4082	301.893	369.406	238.73	435.702	365.931	384.383	352.333	415.431	433.444	470.679	424.012	341.502	333.449	344.727	336.493	383.128	487.942	385.012	423.443	431.56	241.652	327.552	379.629	407.403
140.97	288.704	327.612	46.0568	227.302	376.899	52.3762	303.656	359.816	236.566	436.023	361.012	390.363	348.303	395.095	431.469	468.213	429.796	337.241	317.62	346.649	331.837	371.514	480.872	378.202	410.25	430.605	240.863	322.01	377.952	408.382
142.24	286.193	327.581	42.0558	224.952	378.18	53.44	298.558	362.551	231.753	415.896	359.92	384.254	346.309	411.521	422.691	461.995	418.193	332.003	319.617	349.755	340.927	368.228	477.711	377.88	411.674	421.063	238.365	320.808	378.417	401.08
143.51	282.739	323.111	41.7415	224.075	371.913	51.2606	296.764	352.716	228.129	419.007	355.651	381.244	348.124	407.079	417.278	464.67	417.343	333.079	317.99	347.023	311.535	366.404	473.726	377.361	407.65	428.42	238.568	323.685	377.02	396.035
144.78	277.606	320.653	41.7035	216.957	368.176	48.2616	295.908	346.384	229.893	415.093	349.381	376.051	348.489	411.589	426.277	459.435	417.901	326.611	314.654	352.099	329.252	364.726	462.194	372.479	400.385	421.207	237.954	314.042	370.294	404.17
146.05	273.113	314.34	40.7436	215.146	367.04	48.4881	284.695	351.684	228.702	413.649	354.216	384.266	340.688	411.869	439.421	449.936	421.373	327.976	319.827	333.862	313.456	361.953	454.639	371.447	398.229	415.374	231.233	295.631	371.441	390.939
147.32	269.674	313.35	40.4269	215.104	365.408	47.7322	283.428	347.508	225.819	402.107	336.819	365.39	342.5	400.046	416.088	456.033	417.4	332.057	316.087	338.973	306.692	360.341	464.727	368.826	397.304	412.539	235.573	298.997	363.454	383.133
148.59	266.636	301.382	38.2323	211.008	362.33	46.5253	283.767	338.61	223.126	407.483	336.556	367.204	345.736	408.579	413.844	449.402	418.054	319.561	299.349	330.227	313.169	347.551	462.044	358.954	392.873	408.521	228.745	291.987	363.178	388.581
149.86	266.429	299.171	37.4115	211.922	358.093	46.4821	279.07	342.731	226.024	394.201	346.614	375.649	336.937	406.502	419.866	454.134	412.31	322.997	297.107	329.722	319.142	345.52	444.6	356.076	380.656	406.428	223.58	287.319	362.171	380.492
151.13	260.206	301.914	37.5507	209.666	358.563	45.1732	277.068	340.471	222.016	394.185	333.955	378.677	334.761	407.717	400.049	450.083	404.323	327.826	279.784	340.53	300.197	339.096	462.89	358.134	381.209	406.845	223	276.566	358.321	384.12
152.4	256.731	296.959	34.592	208.059	357.603	44.9925	272.718	328.681	223.905	393.085	328.875	376.241	339.306	405.293	399.305	454.181	420.945	314.143	286.646	328.214	288.155	343.877	462.772	357.922	381.617	406.507	224.056	281.283	355.369	378.401
153.67	252.774	298.31	35.831	205.427	361.518	42.9129	271.548	329.438	218.121	391.68	330.563	367.493	334.328	392.928	396.827	451.871	406.575	305.647	288.289	328.173	310.964	352.009	446.963	360.323	386.918	401.275	227.403	281.799	355.622	379.858
154.94	252.065	292.356	34.222	203.232	354.062	42.1707	270.195	327.55	218.049	384.292	330.016	361.888	333.24	402.746	378.906	451.983	402.563	311.028	288.16	325.898	301.964	332.666	446.879	354.885	370.281	404.772	224.129	278.144	352.697	375.924
156.21	253.791	296.539	34.4667	200.777	355.403	41.6918	263.673	319.128	217.6	390.049	330.835	357.791	328.441	391.449	377.265	455.222	401.883	306.208	281.916	331.087	309.4	327.252	441.707	344.634	366.153	394.962	215.622	265.997	344.788	369.493
157.48	259.387	302.962	36.2131	204.493	355.739	42.4296	264.892	331.507	217.443	397.759	328.137	363.28	328.672	400.176	374.746	451.954	394.973	309.635	277.31	333.198	295.046	326.943	431.301	345.883	369.821	394.725	217.786	256.612	350.51	372.965
158.75	257.301	297.914	34.5824	201.578	362.628	43.1771	268.263	332.644	220.833	396.816	323.856	364.436	324.262	396.873	360.501	449.62	405.903	302.643	276.296	325.671	289.189	328.073	453.276	345.488	363.587	391.99	214.31	260.544	349.221	366.27
160.02	258.698	300.903	34.8314	201.595	361.512	43.3665	265.637	326.858	216.901	389.557	320.192	360.129	323.414	404.876	361.113	449.628	398.717	305.993	273.187	317.694	302.281	334.526	439.284	347.625	368.031	391.346	220.613	256.988	347.091	374.639
161.29	252.766	296.231	32.8753	200.251	348.616	40.0765	264.362	332.968	217.013	383.831	326.502	354.01	321.251	394.117	357.125	444.028	392.799	293.895	275.439	311.842	298.053	333.316	436.731	346.991	371.594	392.271	220.705	265.371	346.109	374.135
162.56	255.982	293.573	33.2968	201.139	358.416	41.7289	264.085	321.909	216.778	387.612	321.498	361.346	322.938	393.395	360.913	447.411	397.959	293.032	266.545	321.363	299.226	334.176	454.337	346.515	373.047	392.98	223.182	260.468	346.317	374.026
163.83	250.852	288.26	33.6282	196.389	354.577	41.2141	257.83	323.463	218.669	387.144	322.572	360.775	312.336	395.694	368.78	438.334	384.491	302.902	265.366	316.407	295.053	351.367	453.177	352.057	370.333	395.48	223.431	267.292	346.837	372.576
165.1	249.145	283.116	31.2638	193.657	346.598	39.9622	256.546	321.203	213.003	373.663	316.021	351.527	309.877	386.405	359.901	430.679	379.923	293.263	267.265	317.803	293.14	339.827	446.433	348.005	369.424	390.699	220.13	258.937	346.859	371.404
166.37	246.334	283.265	31.3824	195.229	339.979	39.5388	255.548	311.327	210.778	374.134	311.479	354.259	318.148	393.994	358.976	427.395	395.266	292.823	263.467	325.831	289.817	340.886	444.144	351.035	372.073	390.223	221.462	265.168	346.297	363.32
167.64	244.627	278.924	29.3422	190.462	342.83	39.3468	249.109	319.535	211.573	375.531	307.052	349.426	316.56	398.88	340.734	423.406	381.661	296.037	263.435	322.581	297.468	348.978	451.155	349.4	365.3	388.051	220.801	267.507	341.06	369.981
168.91	247.733	282.433	30.5718	191.137	345.183	39.8783	251.948	307.077	212.99	378.392	309.099	361.47	316.498	396.415	357.571	429.707	393.56	292.428	257.877	318.489	287.612	353.2	443.518	351.158	376.195	388.959	221.403	259.615	343.225	364.043
170.18	246.76	277.32	30.1324	190.047	345.254	39.3181	251.055	308.002	214.258	378.5	307.539	365.084	313.29	398.861	357.602	418.667	383.37	299.364	251.476	306.441	290.539	346.704	442.061	349.848	368.011	387.745	223.425	263.915	341.94	359.065
171.45	245.582	276.805	30.3736	190.131	337.466	39.6997	248.661	302.543	213.411	378.076	303.365	355.512	315.165	398.172	344.705	411.615	387.709	304.022	246.031	304.149	286.098	352.836	428.962	347.578	365.504	386.038	223.338	256.353	341.123	368.901
172.72	251.346	275.038	33.4417	187.929	348.354	40.9382	251.708	315.574	212.56	372.86	310.388	354.277	309.581	392.474	357.94	410.071	400.829	288.731	245.564	304.811	276.093	350.933	433.455	349.626	367.051	384.728	225.159	257.011	340.042	360.986
173.99	249.453	277.525	32.8662	190.782	347.236	40.1508	248.842	307.118	210.703	368.561	300.84	352.154	318.354	403.444	362.116	409.847	375.923	292.277	245.448	307.938	290.419	336.117	435.942	348.041	365.228	381.832	221.637	263.424	340.069	358.284
175.26	255.614	273.418	34.4464	190.966	347.322	40.8084	250.013	310.508	211.416	371.713	301.651	357.611	316.009	404.381	348.504	405.349	388.845	289.367	225.818	297.85	277.838	335.316	421.922	344.019	362.795	383.672	220.188	253.528	334.626	362.604
176.53	253.345	269.952	32.6677	189.118	345.281	41.2811	253.1	308.08	208.964	369.448	300.275	339.604	309.078	410.794	342.79	407.368	389.72	281.707	232.602	307.813	297.15	342.71	431.071	342.633	360.359	379.689	216.888	242.667	339.214	349.79
177.8	252.058	268.993	34.3489	189.348	343.928	39.618	249.076	314.791	213.721	367.11	296.497	346.505	312.399	397.641	333.035	400.026	394.066	285.067	236.421	299.647	290.228	321.564	419.297	339.742	359.745	376.772	219.003	243.715	332.653	350.841
179.07	254.667	272.101	33.9265	186.873	349.597	41.133	251.454	305.654	213.917	361.688	303.871	327.94	312.034	422.331	342.322	402.568	380.727	289.495	227.51	301.555	289.837	327.613	419.756	334.952	345.783	373.626	216.92	238.249	330.408	347.014
180.34	256.263	269.243	33.4664	186.423	344.903	39.3701	246.361	305.82	213.976	362.734	305.253	335.37	301.283	413.446	337.409	397.155	376.581	278.323	229.452	297.485	281.645	335.444	430.32	340.206	352.168	371.227	215.672	234.16	331.05	356.833
181.61	259.797	267.351	33.9823	186.132	343.613	41.2811	243.839	307.688	213.039	371.681	292.046	343.214	309.86	420.49	325.25	392.421	395.682	279.884	226.188	303.887	285.535	323.032	417.317	337.197	358.693	369.454	217.171	233.046	328.536	341.897
182.88	257.21	273.42	35.4588	186.63	341.572	41.0119	240.276	311.482	213.496	371.682	287.63	334.706	308.41	411.584	335.107	397.433	388.348	280.948	236.074	309.165	292.06	325.115	429.471	335.677	346.27	369.798	213.377	228.534	326.431	339.411
184.15	265.431	268.518	35.544	185.885	348.794	41.8347	251.144	317.832	212.822	373.816	282.872	334.494	307.534	413.909	327.241	394.204	384.459	275.619	242.52	294.181	285.126	326.223	422.57	330.545	349.63	368.563	209.718	229.259	325.549	333.847
185.42	257.207	267.586	34.9994	186.009	347.475	42.4136	246.679	309.074	211.665	366.345	289.531	330.546	301.598	416.564	320.277	395.534	387.51	280.716	230.373	306.786	296.334	317.159	417.103	329.137	350.371	368.425	212.565	228.702	322.673	332.774
186.69	260.508	267.856	31.7601	183.068	341.934	40.9163	243.351	307.612	209.809	359.652	284.988	332.461	309.758	410.289	329.3	397.049	372.204	280.029	229.202	296.987	286.771	307.506	424.145	327.023	343.184	366.435	213.302	226.209	317.381	323.758
187.96	255.817	263.501	33.2584	180.318	335.289	39.2739	244.613	299.99	209.088	362.356	286.655	332.612	309.759	411.512	320.89	389.591	378.25	277.786	223.94	303.625	287.852	301.849	424.361	325.425	340.523	365.1	211.18	224.793	319.179	330.75
189.23	258.362	265.559	35.0937	182.041	339.715	40.3727	235.481	302.699	210.297	358.552	284.761	337.348	309.985	416.768	317.581	391.623	380.528	268.243	236.157	304.22	284.675	307.653	411.757	325.146	343.808	358.224	208.265	222.492	313.76	325.216
190.5	257.032	267.002	36.4685	181.349	341.654	40.2484	233.001	304.533	205.234	369.046	279.293	332.307	307.001	414.546	320.697	396.755	367.751	271.656	225.76	297.534	285.542	304.838	426.231	319.313	332.63	354.503	208.014	224.412	310.221	319.187
191.77	256.897	259.7	33.4385	180.017	333.675	40.7501	236.832	303.063	208.241	357.932	283.784	334.054	306.073	406.964	321.958	394.502	375.378	267.451	222.705	293.259	293.301	299.827	412.608	317.158	334.131	351.284	201.782	213.718	304.745	312.847
193.04	259.741	264.166	37.2649	179.774	342.151	41.489	233.667	301.996	207.941	363.398	278.815	333.552	309.232	409.715	311.545	391.044	375.707	268.476	228.582	285.651	278.539	300.772	428.998	316.12	329.478	348.846	203.297	203.214	308.889	320.609
194.31	259.726	265.495	34.491	181.777	334.827	40.8906	233.347	305.912	206.045	361.353	281.267	334.888	311.137	414.956	332.508	392.107	363.951	265.034	226.278	298.159	280.855	302.202	413.999	314.92	325.539	351.173	199.922	214.254	306.109	311.392
195.58	258.839	264.549	34.9063	180.269	334.039	39.8702	235.865	306.8	204.215	366.628	275.106	328.939	309.723	414.95	320.046	388.958	371.407	266.83	219.68	290.498	268.058	301.068	418.201	315.968	321.394	350.576	200.024	209.589	307.759	307.187
196.85	261.166	267.052	37.0487	180.623	341.636	40.1833	228.44	303.622	205.415	367.42	279.365	322.841	306.554	416.015	324.101	388.107	372.772	269.393	217.783	294.039	265.483	288.834	419.88	316.657	331.591	348.82	200.617	212.677	302.281	323.711
198.12	259.9	264.247	33.9453	180.668	335.74	41.2735	224.41	297.349	206.572	354.505	278.213	323.403	302.544	414.57	341.398	378.418	360.817	266.642	221.888	303.615	274.277	301.327	419.371	317.103	333.489	352.688	203.222	214.559	302.282	319.283
199.39	262.654	258.844	34.7668	178.195	334.654	40.5595	225.521	305.119	200.724	358.097	280.612	327.43	305.957	407.903	321.424	378.879	365.773	264.293	218.062	302.498	272.643	292.581	409.571	317.053	332.384	352.631	202.14	217.02	307.892	316.96
200.66	261.176	262.24	35.1861	178.103	332.132	40.6378	227.863	296.555	202.468	364.237	286.595	334.414	298.497	419.801	335.06	383.56	369.426	265.698	214.414	301.084	265.14	294.626	411.031	316.929	333.247	347.988	202.6	220.241	302.521	306.41
201.93	265.351	258.484	37.5681	178.396	334.509	40.8914	230.278	302.795	200.956	363.065	277.291	333.596	302.062	409.422	335.09	372.203	367.298	267.303	211.96	296.535	284.509	296.45	417.545	320.034	327.804	348.908	201.503	222.405	303.866	319.172
203.2	268.403	266.918	37.0497	180.794	336.709	43.2932	226.797	301.04	204.129	354.264	271.056	336.946	299.52	407.096	348.142	374.569	352.885	268.049	216.165	296.724	272.779	297.538	413.015	310.555	332.031	342.679	199.081	212.453	303.955	310.782
204.47	263.734	264.349	37.3727	179.346	331.368	43.1216	220.637	297.311	201.496	355.594	265.364	323.914	302.111	408.872	321.691	370.996	367.161	260.462	216.73	303.234	273.606	290.292	402.576	312.246	331.384	346.402	198.473	210.657	294.328	315.522
205.74	267.747	258.155	37.1978	179.817	339.166	41.3284	227.535	306.713	203.22	367.932	276.458	334.194	305.842	421.353	328.685	367.223	355.814	261.675	218.004	296.779	272.111	292.08	405.444	308.175	321.165	343.247	194.203	210.251	295.152	311.573
207.01	271.49	261.896	39.6005	179.689	337.798	42.324	214.276	306.426	203.74	358.877	266.349	335.941	295.379	406.973	326.927	362.295	341.041	265.564	227.723	308.029	282.892	287.781	395.928	306.082	325.993	345.279	194.765	206.449	293.213	296.784
208.28	270.827	262.093	36.5567	179.024	338.446	43.5857	223.744	295.668	200.051	358.356	270.05	328.736	300.105	419.155	322.478	359.402	355.481	256.517	214.299	301.182	278.757	282.461	406.314	304.492	326.826	342.07	192.206	208.685	293.894	307.138
209.55	268.078	258.407	38.5461	180.181	334.523	42.1796	222.182	293.161	197.685	355.562	265.102	336.917	298.59	424.259	318.946	366.158	346.279	261.97	227.765	307.142	270.107	277.491	390.639	305.262	323.191	335.755	194.174	201.061	291.233	308.501
210.82	268.608	254.036	37.7109	177.496	331.908	41.0614	219.924	299.774	198.853	366.972	267.301	326.928	292.312	418.498	335.111	365.97	345.596	261.502	207.484	302.622	278.961	275.778	380.478	303.666	327.599	333.399	194.798	204.554	289.135	305.103
212.09	266.704	255.297	39.5272	178.187	327.434	42.5361	220.198	300.402	198.461	361.847	260.944	334.563	294.639	423.511	333.359	359.157	342.381	264.227	200.838	310.35	287.989	279.035	389.657	301.725	324.691	336.3	196.23	202.94	285.674	309.435
213.36	265.862	254.487	37.7807	177.109	329.646	42.4302	218.362	297.752	199.902	360.309	267.748	331.904	297.164	419.468	321.577	357.631	342.661	266.805	212.28	300.904	273.769	273.337	374.511	296.544	324.88	333.016	187.221	204.854	291.302	300.356
214.63	264.235	254.22	39.096	175.76	325.743	41.7337	220.468	287.921	197.292	359.328	266.382	333.953	301.569	425.416	324.991	351.129	343.29	258.772	209.685	298.886	279.588	268.667	373.731	295.023	318.307	329.136	186.658	193.142	279.471	292.015
215.9	264.086	252.003	39.3581	176.039	329.161	41.4204	215.071	297.662	192.255	349.765	261.863	328.079	292.517	432.231	332.485	351.898	351.606	259.471	212.713	308.985	272.01	270.462	381.015	289.561	321.463	326.771	185.963	191.177	278.94	293.133
217.17	264.124	249.776	38.0485	175.025	328.747	44.0201	210.368	284.657	194.626	350.779	260.482	333.151	292.481	430.988	323.732	346.888	351.988	258.109	211.729	309.797	290.275	271.107	375.204	287.597	316.446	321.363	185.169	186.778	276.573	294.994
218.44	264.004	246.485	38.2036	174.954	324.021	42.4966	211.505	291.377	192.795	359.587	260.407	332.054	299.131	417.179	330.711	348.817	348.229	263.725	194.197	299.946	281.464	270.24	372.556	291.12	311.269	320.348	184.643	188.515	278.639	292.222
219.71	269.038	243.078	38.8192	175.304	331.744	43.4297	217.222	296.341	193.95	363.038	268.682	332.793	297.638	434.551	317.825	338.646	345.633	265.28	200.768	299.269	292.715	271.308	364.474	287.127	315.094	320.146	184.647	182.935	279.946	297.368
220.98	266.7	241.936	37.6033	175.681	327.176	43.0217	211.502	281.681	194.385	348.667	272.031	337.282	298.908	425.256	323.587	343.294	338.567	271.816	202.495	299.37	288.189	268.027	357.374	292.845	314.379	321.488	183.831	188.313	275.408	296.503
222.25	267.219	246.06	36.1537	174.091	322.566	43.756	209.104	281.521	195.65	347.074	264.862	327.663	292.843	425.389	325.187	339.131	324.446	264.552	197.457	304.785	281.91	272.229	355.337	291.34	313.992	320.219	184.343	186.285	279.587	296.361
223.52	265.476	240.194	37.5544	174.088	320.02	43.0705	210.958	281.216	191.253	350.075	267.204	334.193	293.706	416.341	341.05	330.596	344.889	270.412	183.078	298.854	296.692	272.458	363.055	295.015	322.805	316.204	185.087	192.28	284.252	304.467
224.79	268.122	241.154	37.5178	173.469	326.692	44.2877	211.263	285.481	193.161	343.427	270.041	336.993	298.664	410.964	326.287	337.432	336.508	269.356	200.273	305.046	295.49	267.793	357.124	292.451	322.893	315.28	184.96	180.051	275.556	294.772
226.06	266.714	240.951	38.9151	174.669	325.382	43.7234	208.582	276.754	194.471	350.002	267.289	344.055	297.85	424.452	327.54	332.908	340.934	266.236	195.79	294.783	287.191	272.022	360.209	290.934	319.553	319.527	182.443	183.483	274.642	287.953
227.33	263.659	236.458	39.9707	174.095	324.865	44.6797	209.742	280.494	193.042	347.021	259.616	346.751	298.958	428.446	323.268	334.847	330.012	269.001	200.513	297.339	302.942	267.903	363.118	289.761	317.232	314.885	180.077	188.208	277.325	288.494
228.6	266.721	238.034	39.7156	173.429	322.801	45.955	216.338	277.589	194.345	354.789	262.78	345.114	300.692	414.683	315.661	325.752	332.214	265.615	182.748	288.684	300.329	262.414	344.706	287.695	315.729	310.025	178.367	189.501	276.307	281.906
229.87	265.753	235.6	37.9651	172.035	319.858	45.5622	207.764	281.907	195.571	349.401	257.979	348.566	300.344	426.881	310.568	326.027	326.517	270.584	180.793	296.337	285.871	263.383	357.962	284.91	312.653	309.521	178.654	182.684	273.798	288.185
231.14	263.289	234.776	38.0714	173.15	323.892	44.751	212.754	278.101	193.965	347.877	256.19	343.495	307.547	430.762	325.618	327.049	331.058	265.946	185.161	291.625	280.971	266.143	346.404	286.123	306.85	307.373	173.949	184.181	269.95	283.271
232.41	265.122	233.105	38.5546	172.667	327.419	47.0377	211.741	281.867	191.811	345.866	250.928	344.953	304.922	435.34	305.811	322.629	330.63	262.053	190.225	290.765	287.971	264.584	335.759	285.902	320.131	310.13	178.749	182.834	270.108	285.725
233.68	264.16	235.493	39.8473	170.8	322.354	44.9021	211.339	277.283	191.833	337.912	258.45	342.271	308.085	427.082	313.807	316.595	330.779	264.258	192.38	292.752	273.786	260.097	338.457	282.752	312.332	308.416	174.758	176.301	268.973	285.045
234.95	261.851	230.58	39.6723	172.499	325.956	44.6853	209.575	278.719	192.067	348.487	266.653	349.09	297.164	435.751	303.77	318.292	315.457	264.414	187.535	291.19	286.724	249.723	338.164	276.216	307.975	303.932	173.503	178.113	265.651	279.583
236.22	259.789	231.136	37.8435	172.88	323.572	44.9134	215.023	272.495	189.357	345.233	256.959	341.859	304.917	419.045	328.922	308.837	330.83	264.198	190.941	290.255	283.024	252.911	332.52	276.528	306.86	303.26	172.569	174.526	267.117	283.562
237.49	261.45	228.262	38.08	172.79	325.813	44.9663	211.722	271.847	188.206	343.341	256.304	354.358	302.721	428.314	314.039	310.442	330.108	266.214	188.714	285.602	299.979	247.385	339.186	277.939	314.961	297.177	174.698	175.566	265.221	276.276
238.76	258.174	228.032	40.2858	173.27	321.366	44.8112	217.515	266.242	186.856	340.039	261.271	351.596	301.866	425.517	302.11	313.224	328.633	264.734	196.632	290.512	299.084	258.143	337.109	274.139	314.999	302.348	173.904	176.108	265.254	279.358
240.03	263.755	229.506	37.44	170.651	322.291	45.0771	211.297	265.623	189.494	336.851	259.691	352.22	299.796	429.997	305.36	300.501	331.711	270.756	189.429	276.584	287.65	254.988	344	275.993	314.431	299.699	169.823	173.232	262.791	280.23
241.3	262.902	229.908	39.434	170.159	326.21	42.4577	212.4	272.849	188.545	338.284	253.1	346.229	302.932	424.66	319.073	305.443	320.158	269.368	196.703	279.778	293.339	252.167	347.102	274.539	314.889	294.918	172.926	170.704	259.503	276.511
242.57	261.866	224.997	38.6795	169.461	323.956	42.6945	208.661	268.694	187.282	341.497	250.496	349.963	300.492	421.098	317.877	292.67	326.741	266.733	189.62	281.165	294.114	249.12	320.334	271.828	309.675	300.296	173.107	172.774	258.032	279.819
243.84	260.758	228.374	38.9757	170.003	323.646	42.9706	216.552	269.188	183.243	337.815	248.912	346.767	304.009	429.367	317.93	301.923	313.342	269.629	200.876	274.261	287.159	252.245	329.509	272.909	304.626	297.796	171.315	173.332	264.982	281.982
245.11	263.642	226.485	38.3325	169.985	323.469	43.3707	213.386	269.159	183.539	340.251	247.903	340.801	305.45	425.046	305.842	306.293	304.086	272.103	203.293	267.49	303.121	249.163	325.659	273.368	314.914	295.019	174.429	174.273	262.546	277.287
246.38	258.777	223.819	38.4191	168.779	324.707	43.3142	210.498	278.02	183.076	335.174	244.266	351.189	301.956	428.047	330.52	292.676	307.811	266.989	202.823	276.488	287.171	241.784	316.603	268.251	309.239	298.897	168.344	171.176	258.304	268.695
247.65	256.765	225.885	38.2091	169.981	325.859	43.8027	217.543	276.308	180.33	331.873	249.299	343.545	299.541	424.281	328.796	304.211	318.455	268.452	208.41	269.639	293.836	242.216	319.001	264.087	305.595	296.32	169.59	167.763	261.665	269.996
248.92	262.525	222.897	37.0152	168.794	321.521	43.3154	217.48	272.501	182.333	330.677	244.791	335.759	303.663	420.108	311.539	293.156	309.765	269.237	198.536	270.712	282.796	249.166	313.107	263.51	309.669	299.667	168.571	169.861	256.575	276.364
250.19	259.489	223.284	37.6591	169.431	323.065	44.6745	215.738	264.056	179.875	330.648	243.641	344.548	312.172	421.811	317.467	285.483	309.668	273.245	205.706	266.295	290.104	240.749	315.216	268.671	308.202	295.476	167.296	168.949	255.333	278.782
251.46	260.314	222.605	37.7366	169.446	319.222	44.0475	216.786	272.134	177.323	339.716	248.048	344.854	298.617	417.48	311.259	294.223	309.447	268.541	210.188	264.207	284.49	249.624	306.687	260.442	308.02	295.9	167.331	165.727	251.932	270.371
252.73	263.614	221.859	37.3499	168.396	319.683	42.9511	215.013	273.114	181.467	339.268	241.705	342.702	307.669	417.859	314.506	286.976	314.971	265.077	208.77	264.275	310.83	256.095	304.95	265.847	309.015	291.053	168.679	171.426	257.553	278.072
254	256.569	221.561	37.3113	170.177	327.749	43.3539	212.394	265.004	182.921	339.097	237.101	343.435	304.912	414.304	301.044	282.654	315.491	264.252	202.459	257.104	309.756	247.923	306.199	264.146	307.498	287.75	168.153	172.735	252.793	274.029
255.27	258.512	219.601	37.416	169.345	315.903	43.2544	215.934	266.62	181.208	337.56	236.086	336.826	310.424	416.836	320.854	292.808	321.349	267.109	201.706	256.714	312.915	252.546	296.9	262.094	301.27	289.161	167.908	170.213	251.319	269.294
256.54	259.004	222.874	35.6024	168.852	320.695	42.0964	217.09	267.618	180.185	339.722	234.302	334.135	307.821	411.003	305.455	289.508	322.396	265.541	205.606	254.49	326.531	250.385	302.134	261.36	301.432	288.646	165.76	170.004	244.105	269.434
257.81	257.272	217.899	37.0422	168.326	317.508	43.1026	214.839	265.48	181.905	343.113	231.858	336.231	304.144	406.328	313.559	277.711	319.997	270.151	193.613	256.799	330.766	237.672	312.895	259.981	303.561	293.84	168.053	169.988	247.976	266.447
259.08	258.465	212.938	36.8898	167.739	315.835	41.5291	220.069	271.016	178.751	331.964	238.756	343.632	303.569	411.521	317.935	271.129	305.329	278.06	208.025	251.173	334.524	232.878	303.7	262.229	308.024	288.397	168.537	168.869	245.793	269.083
260.35	258.695	214.919	34.538	166.746	313.414	41.1361	214.4	271.128	176.458	338.258	232.682	333.92	296.357	416.389	312.383	272.646	311.375	269.263	201.246	252.43	341.333	242.853	284.449	260.165	300.725	289.47	167.406	164.528	245.62	259.551
261.62	255.868	213.813	36.4671	166.412	316.958	41.3711	213.961	271.211	175.773	334.451	232.075	341.788	294.361	395.945	323.125	268.898	300.691	273.898	196.494	252.555	330.203	240.929	288.171	254.876	300.974	284.977	166.533	168.803	248.555	273.348
262.89	258.535	212.436	36.2986	166.562	317.403	41.0243	213.556	269.95	175.251	336.814	234.301	330.154	296.987	410.412	306.81	263.951	293.376	272.463	192.829	263.747	324.065	240.159	281.674	254.846	299.688	292.612	167.084	162.188	240.698	270.139
264.16	261.528	212.396	37.2777	168.097	313.856	40.5763	214.376	276.579	175.092	334.399	225.503	330.834	300.191	391.976	318.676	264.714	301.04	274.325	200.167	254.099	338.96	245.018	275.905	255.826	305.666	289.295	166.351	171.849	243.49	264.325
265.43	262.731	213.172	36.5099	167.135	313.957	40.7949	207.171	275.227	176.393	339.425	224.798	334.107	298.184	397.842	308.428	267.55	298.913	276.042	197.657	243.89	325.692	241.961	264.35	258.314	301.114	289.13	170.963	170.377	243.363	269.527
266.7	260.055	208.709	38.7838	169.272	313.271	41.5433	211.116	270.191	178.047	346.162	222.847	333.512	296.001	411.268	302.356	264.082	294.454	278.549	189.898	254.56	334.638	236.461	274.602	255.187	302.979	287.066	171.893	172.224	244.812	262.838
267.97	263.601	209.827	37.5382	169.006	313.061	41.44	205.683	272.045	176.545	341.015	221.762	330.654	295.259	406.696	294.762	263.416	292.703	280.512	190.885	246.068	341.786	239.108	270.003	259.292	308.171	282.286	169.855	173.71	246.941	273.995
269.24	259.926	207.958	36.5772	167.251	323.728	42.3476	206.103	270.396	173.952	337.234	221.482	322.291	296.141	399.865	298.027	257.246	287.253	277.96	182.637	251.394	349.059	238.689	253.683	259.232	310.378	290.628	168.55	178.554	246.459	273.28
270.51	263.919	208.275	38.9492	166.923	312.041	42.0376	207.874	275.286	172.669	341.067	228.741	331.382	291.075	406.076	294.098	258.311	286.651	277.546	189.565	241.926	329.727	236.957	264.769	260.64	313.994	291.126	167.103	176.1	247.784	270.009
271.78	263.003	204.118	38.1368	166.364	317.899	43.1078	202.26	269.29	173.719	338.848	220.063	329.787	295.27	398.573	281.709	260.127	273.449	282.823	186.829	248.591	338.295	236.19	255.31	257.096	313.301	284.799	167.432	174.526	245.973	276.898
273.05	263.046	206.486	36.8031	163.48	316.424	44.0127	199.397	263.772	172.775	340.979	226.667	322.377	291.78	391.276	278.767	256.647	269.661	281.007	183.759	249.058	322.682	236.486	253.255	258.113	308.314	286.05	169.681	177.184	245.087	274.493
274.32	263.624	203.847	37.1551	164.702	315.087	42.4355	199.422	264.448	173.483	337.44	230.116	326.386	289.909	385.841	282.063	259.281	274.903	292.616	181.11	244.3	331.664	239.303	270.166	263.141	318.417	285.274	171.749	175.097	246.506	269.789
275.59	265.313	205.37	37.6124	164.1	308.302	42.4376	198.918	264.91	173.405	333.496	224.544	321.595	287.465	399.353	283.777	253.937	279.999	286.997	191.121	248.266	325.132	244.812	248.726	264.123	316.471	283.618	169.481	185.333	249.489	275.218
276.86	261.106	205.33	36.2715	164.288	316.923	43.5712	200.147	270.201	174.128	332.859	220.849	320.236	291.587	385.668	273.357	255.566	279.11	288.29	176.592	238.378	340.026	241.141	267.347	264.836	317.545	285.93	174.844	193.084	247.934	276.552
278.13	261.236	206.275	36.2769	163.248	307.801	42.4909	201.655	267.255	174.617	327.886	223.736	325.674	296.028	387.379	276.896	256.281	275.667	291.926	176.037	250.073	333.053	241.575	268.021	265.397	321.943	283.175	172.183	192.562	248.598	279.824
279.4	265.016	207.213	35.2743	162.921	306.809	42.2525	196.193	274.418	171.001	336.838	224.923	315.278	284.681	384.749	276.876	251.027	273	294.776	169.06	250.86	351.528	239.064	256.323	265.675	326.85	285.184	173.644	193.585	249.504	276.132
280.67	263.377	206.757	36.0038	162.939	309.187	42.6663	193.852	260.292	168.442	332.541	210.343	328.37	285.605	379.479	266.217	245.856	274.71	299.644	168.58	247.08	351.619	241.816	259.321	266.696	318.818	284.682	174.865	193.646	246.827	272.631
281.94	262.998	204.442	34.8076	161.633	305.722	41.4685	187.065	260.211	169.56	321.708	218.525	315.69	291.153	379.38	279.12	241.7	267.293	296.245	167.141	255.87	349.418	244.961	257.449	267.336	322.253	286.434	177.649	194.921	249.397	274.608
283.21	267.673	203.829	34.9624	163.743	307.033	43.4156	193.847	260.01	172.466	326.019	226.483	314.848	290.4	392.189	252.88	251.181	269.73	298.469	165.494	251.575	356.301	244.978	256.728	269.416	323.515	282.44	177.684	189.454	247.778	282.805
284.48	265.326	200.13	35.7563	161.418	308.02	45.0018	192.749	262.36	169.91	329.064	226.887	320.788	293.111	388.52	256.125	249.971	282.351	303.348	156.08	245.849	356.996	251.313	255.075	269.135	319.781	286.201	175.391	204.363	245.674	282.046
285.75	265.737	200.833	36.063	162.157	309.003	44.0896	189.983	264.965	168.908	331.537	225.477	314.174	290.785	391.416	257.554	248.761	281.897	303.224	161.172	242.693	351.765	247.776	260.702	275.07	322.13	279.568	175.173	205.685	252.26	282.607
287.02	263.417	199.801	34.2293	162.633	308.335	44.4563	188.585	262.911	172.066	325.356	217.485	318.221	294.747	392.614	259.381	249.885	278.679	294.166	160.947	252.598	339.928	248.515	267.003	276.327	325.43	286.725	179.784	203.273	252.144	288.431
288.29	266.389	201.377	34.5493	159.886	308.04	43.7004	187.665	265.765	171.049	330.481	218.748	314.306	295.908	389.618	266.124	244.781	286.062	299.714	154.402	241.352	342.052	252.361	257.764	274.135	317.331	282.389	179.22	203.944	254.308	284.364
289.56	268.598	197.352	35.9283	161.391	310.95	44.1107	186.364	265.269	167.763	332.278	214.688	304.976	292.964	381.961	252.568	249.247	290.603	299.234	144.673	247.212	344.47	254.782	259.768	270.901	324.629	285.357	180.106	209.911	251.818	284.212
290.83	264.023	194.553	36.2691	162.522	307.497	44.6277	186.496	255.597	171.929	324.342	214.198	306.883	287.033	390.659	266.402	240.731	293.965	302.449	141.211	244.002	332.299	256.958	252.382	279.612	325.481	280.448	180.176	210.833	247.615	286.233
292.1	266.004	196.269	36.9697	162.034	308.889	44.9426	177.804	259.342	169.735	326.291	213.052	306.039	289.629	388.061	273.658	240.676	289.894	308.702	142.185	244.683	340.584	253.459	261.057	277.145	326.368	283.536	180.835	210.318	244.263	296.241
293.37	260.835	193.382	35.5388	161.011	306.987	45.2969	183.619	253.564	169.261	319.406	214.14	312.259	279.254	385.156	264.74	242.064	290.569	304.067	136.927	254.773	355.769	254.86	259.238	277.308	323.094	286.346	181.303	207.154	247.71	294.604
294.64	261.442	193.377	34.5691	159.644	311.027	45.3551	179.97	260.222	167.101	324.574	218.149	302.667	283.704	386.907	262.233	234.728	279.149	304.57	139.133	247.332	341.18	250.193	260.912	277.969	327.846	279.438	181.087	209.137	244.906	282.807
295.91	258.314	194.095	35.0777	158.7	306.537	43.7941	176.705	258.59	166.44	318.873	221.179	301.879	283.569	384.622	253.271	236.591	294.826	303.594	131.592	255.345	339.925	260.829	267.651	280.383	326.099	280.142	181.047	223.136	245.022	290.031
297.18	259.098	188.836	35.8658	159.663	308.815	44.6047	181.267	253.668	169.3	318.196	213.081	299.166	287.824	396.79	260.252	240.46	287.138	297.938	135.278	257.209	337.265	259.077	269.723	279.89	328.043	279.15	180.234	214.889	246.037	281.368
298.45	256.868	191.256	35.1364	160.106	309.629	44.2516	177.149	258.013	171.165	316.074	214.118	303.808	280.192	392.385	262.977	235.778	284.523	292.23	132.963	252.338	330.98	261.062	260.229	282.721	332.893	276.755	184.93	218.095	246.141	290.277
299.72	258.687	187.181	35.6948	159.461	311.791	44.6983	174.509	254.692	164.36	320.217	211.936	303.008	288.07	389.018	279.476	230.124	298.362	300.4	144.879	259.749	328.52	251.594	256.029	284.069	330.95	274.381	181.895	222.805	247.012	293.466
300.99	261.046	195.791	34.1302	158.939	307.635	43.8235	172.417	254.223	165.61	314.006	209.552	298.141	280.963	393.613	258.366	232.754	290.422	304.477	134.705	268.363	319.798	254.937	256.286	282.842	331.89	276.733	183.023	221.952	245.079	292.196
302.26	258.042	193.189	34.5148	159.673	309.892	45.3092	176.36	259.58	165.718	307.545	215.364	299.324	275.703	389.493	259.404	231.222	292.457	295.523	127.597	257.817	320.818	259.262	264.042	283.833	330.298	275.925	183.799	221.716	242.74	287.801
303.53	256.347	191.235	35.4879	159.07	317.485	44.765	174.626	255.995	163.423	318.224	212.333	303.736	280.185	386.427	276.2	229.774	292.054	294.907	123.037	257.866	311.667	254.444	252.409	286.196	327.736	276.815	180.631	225.325	244.749	286.981
304.8	253.123	187.226	34.141	157.376	312.556	45.0541	174.829	254.232	162.276	309.537	215.401	300.536	282.344	397.638	253.702	228.486	297.362	290.728	138.44	264.329	308.325	254.034	245.654	287.621	326.071	275.34	183.415	224.66	241.853	292.923
306.07	254.651	188.175	33.767	158.841	312.846	44.305	172.677	254.036	163.762	313.482	215.681	295.306	287.014	396.991	259.899	232.056	288.813	295.512	124.08	258.648	294.599	263.066	262.655	286.759	336.312	274.81	180.755	222.762	244.987	291.075
307.34	251.509	185.822	34.6055	155.652	310.599	43.4583	172.258	246.226	162.919	318.069	220.967	299.374	277.69	396.549	252.185	230.579	289.272	290.507	133.886	260.649	299.416	258.297	260.183	288.829	338.625	271.725	186.404	229.312	244.452	289.092
308.61	257.737	181.773	35.0971	157.663	309.297	43.8237	172.445	259.016	159.325	314.942	215.93	302.935	292.096	404.741	242.848	235.942	285.955	293.584	132.499	259.018	283.893	267.068	262.392	289.204	331.498	272.218	184.692	230.603	243.157	290.754
309.88	251.291	185.22	33.7856	157.409	306.776	41.3734	175.959	256.225	161.256	310.92	214.052	294.962	289.46	408.556	233.55	232.988	301.409	293.107	130.325	266.35	305.018	265.784	253.195	285.399	331.927	271.396	181.815	230.653	246.84	289.691
311.15	254.733	187.823	33.6239	156.363	314.447	42.307	175.609	260.562	159.157	318.285	211.684	296.544	290.97	404.596	238.797	234.269	296.375	287.115	122.455	263.48	311.712	273.775	273.29	289.721	328.359	267.866	185.666	230.935	246.394	297.449
312.42	250.972	188.625	35.6073	154.97	308.255	42.3355	171.194	250.736	160.713	316.273	208.844	288.517	284.495	394.495	240.035	225.462	297.548	292.493	128.729	263.808	292.479	266.415	263.993	292.521	332.511	267.002	183.023	228.775	241.011	288.993
313.69	254.406	181.385	33.8319	155.461	309.856	42.68	171.463	255.271	159.369	311.92	214.903	290.302	287.27	408.666	233.164	233.042	295.946	280.174	127.591	264.863	287.847	265.252	260.735	294.763	326.385	265.941	184.938	236.394	245.419	289.361
314.96	250.975	184.28	32.9762	154.896	308.306	42.692	169.825	252.58	158.179	310.79	212.872	298.698	287.273	399.189	242.716	233.322	285.097	283.933	118.803	261.274	296.385	276.327	261.397	300.101	331.563	265.623	183.355	237.679	243.998	293.828
316.23	256.568	184.547	33.2748	154.781	308.874	42.2887	164.892	253.928	157.419	300.789	221.539	293.917	282.86	395.308	238.842	232.63	289.139	286.072	127.149	265.058	296.52	266.952	245.365	299.474	331.257	264.983	183.112	233.759	240.644	294.817
317.5	257.207	179.945	34.3269	153.645	312.278	41.0996	167.732	243.003	154.89	306.25	219.387	306.728	286.151	405.327	232.574	227.637	299.257	283.405	126.502	266.793	286.231	275.041	259.045	302.897	331.513	258.366	185.593	246.469	240.733	295.048
318.77	257.156	180.466	33.7746	151.885	308.057	41.5226	168.446	253.718	153.321	307.824	213.474	302.096	282.123	404.145	238.296	236.368	300.673	287.618	118.999	263.546	309.055	283.27	256.536	299.454	331.13	262.705	186.766	244.971	244.391	286.901
320.04	252.416	176.51	33.4904	152.164	312.376	40.1789	160.251	257.233	155.129	315.475	214.681	303.506	279.269	422.485	227.188	234.071	295.85	282.917	120.321	251.688	295.086	275.06	246.926	301.708	328.399	261.622	186.452	243.332	244.695	293.446
321.31	255.085	176.247	34.8202	153.302	313.666	41.8765	166.141	248.93	154.879	319.635	216.387	302.927	272.557	402.302	216.95	228.273	291.576	287.875	117.221	265.009	306.459	282.638	249.352	299.185	328.269	259.245	185.959	239.931	238.664	289.35
322.58	254.673	174.631	34.9755	152.339	310.663	42.0537	166.104	252.183	153.672	304.187	218.679	298.737	274.042	398.475	227.486	222.686	293.863	287.106	107.051	262.977	313.553	288.87	240.98	305.201	326.027	263.564	187.915	250.866	236.995	300.53
323.85	255.998	171.531	35.0055	153.628	311.608	42.1838	161.526	257.814	154.373	306.025	216.832	286.046	268.437	397.515	222.611	228.277	295.8	286.157	112.067	258.905	295.899	280.719	255.799	302.752	329.96	259.887	187.22	240.66	242.772	295.096
325.12	252.724	168.823	34.2646	151.195	308.507	42.7732	163.931	249.118	155.533	309.519	215.872	295.146	267.482	405.067	205.349	224.229	295.503	285.805	118.865	258.77	300.353	275.052	257.553	298.937	321.066	257.949	186.382	240.482	238.902	288.661
326.39	254.482	174.161	35.0782	152.477	313.354	42.4635	158.171	244.3	154.521	309.575	212.052	301.331	269.637	404.957	206.763	222.263	296.934	286.817	108.582	257.268	306.096	282.489	248.266	303.764	322.454	258.376	188.82	250.515	238.14	285.825
327.66	256.425	169.28	35.3305	152.007	309.23	42.3054	165.87	242.367	155.649	297.462	212.091	299.146	266.396	407.98	206.744	228.085	298.045	281.947	112.538	251.825	301.725	284.154	251.452	303.211	317.29	260.479	190.512	247.819	234.761	293.248
328.93	251.428	170.949	34.5862	151.647	312.692	43.0624	158.824	246.469	154.884	304.353	207.512	298.094	263.163	405.932	212.174	228.318	288.685	281.518	119.572	253.123	309.448	283.287	248.652	300.586	319.827	261.088	187.202	252.702	236.988	292.097
330.2	261.016	171.023	35.2126	152.638	310.645	42.8221	162.145	251.278	155.247	315.39	222.632	298.736	262.591	408.617	207.246	223.835	285.098	285.327	102.487	271.364	298.113	281.118	252.757	301.805	317.073	260.221	188.085	246.037	235.798	292.881
331.47	256.125	171.739	34.8236	152.009	306.334	41.3363	166.099	254.621	152.378	300.779	215.867	298.181	264.57	402.653	207.476	227.423	289.96	285.983	111.331	267.32	303.701	283.906	244.212	300.51	311.97	260.989	188.141	250.742	231.904	293.928
332.74	254.635	172.153	33.7485	151.659	314.602	41.2216	159.933	248.757	153.707	304.878	212.241	292.25	263.892	403.8	202.584	220.031	296.613	278.324	110.825	264.863	305.473	283.718	250.801	298.323	316.696	259.541	188.275	255.968	239.47	294.383
334.01	251.596	173.147	34.7257	152.029	302.606	41.2633	158.516	248.693	153.495	302.326	216.078	299.063	257.625	401.063	200.147	216.918	284.246	285.727	102.31	267.523	308.879	282.269	253.477	297.92	315.585	259.582	187.908	257.451	235.788	285.708
335.28	255.633	173.186	35.45	153.385	310.482	39.9188	159.155	243.304	151.111	308.058	216.007	300.465	258.042	411.561	190.17	222.361	291.361	282.588	105.25	267.477	303.577	280.387	257.369	300.94	309.049	254.917	187.757	257.227	233.53	298.785
336.55	247.993	171.066	35.2878	152.296	307.971	40.3702	156.119	243.72	150.795	311.108	221.416	304.282	251.587	405.445	197.251	219.083	298.328	283.162	102.889	268.278	289.697	290.699	257.725	299.087	311.842	257.451	189.662	254.212	236.06	294.369
337.82	246.319	170.793	34.1583	152.496	302.861	40.4778	158.256	242.232	151.97	304.537	212.223	292.443	258.577	404.628	185.734	215.223	287.105	287.384	100.644	255.8	307.841	289.502	274.757	301.763	310.666	253.433	186.069	256.719	232.761	291.839
339.09	252.95	172.638	34.1734	150.32	309.508	40.7571	159.169	243.29	149.454	301.336	225.837	300.915	253.957	400.658	201.677	220.454	285.823	287.048	95.0286	262.254	303.402	285.458	268.073	301.068	309.401	255.605	190.413	263.514	232.409	293.284
340.36	247.934	172.228	33.8206	150.757	304.229	40.2536	154.964	246.142	152.756	303.908	217.376	302.752	258.026	409.08	203.304	206.933	271.91	287.792	91.3146	269.406	291.576	299.183	262.149	299.667	311.175	255.272	188.661	259.349	231.728	284.599
341.63	246.468	169.267	34.2173	152.516	306.893	40.8017	152.619	248.437	150.576	301.906	224.199	302.191	252.723	398.712	199.831	211.835	277.591	289.693	89.8536	263.913	309.036	282.709	266.2	298.947	310.917	254.884	189.417	265.536	234.034	296.805
342.9	248.981	172.537	34.0982	150.656	307.303	40.5051	155.819	246.278	150.491	300.899	219.894	296.761	250.026	400.136	199.277	210.643	284.072	288.634	88.6457	265.964	301.651	292.94	269.296	298.059	304.442	253.481	188.613	250.896	236.034	300.463
344.17	245.941	174.122	33.8497	150.586	305.271	41.2121	151.16	246.178	152.334	303.349	210.746	300.625	247.796	393.454	195.03	203.175	276.653	285.007	88.1846	269.704	299.154	292.329	270.755	297.884	307.108	261.128	188.094	265.972	234.806	295.661
345.44	243.362	171.697	34.9133	150.259	305.462	40.8141	153.787	246.27	151.043	290.996	219.494	301.371	243.633	397.882	189.027	203.298	274.126	287.806	84.8699	261.02	298.406	293.908	280.066	300.474	305.35	253.045	185.776	266.074	234.887	295.057
346.71	242.867	171.432	34.0094	151.299	303.721	40.3832	146.888	247.39	150.654	290.976	220.331	300.322	252.878	406.149	173.731	209.427	278.151	287.286	96.7479	272.14	305.321	286.008	266.951	297.56	305.851	257.8	187.99	256.243	232.412	295.04
347.98	243.191	171.258	33.6538	148.842	305.359	42.2762	148.738	244.448	148.412	296.64	221.268	303.213	247.829	402.641	181.807	209.741	265.776	284.831	88.8443	255.206	304.343	287.561	265.866	295.993	301.976	256.132	185.76	261.044	235.337	295.539
349.25	238.73	166.962	35.5907	150.851	307.483	40.7902	147.413	246.167	151.805	294.591	216.962	299.686	251.647	407.151	171.309	209.956	268.167	285.471	91.2776	269.449	303.809	288.981	270.691	295.596	307.664	255.451	187.838	264.868	235.286	297.231
350.52	239.138	163.919	35.3804	149.34	304.405	40.5823	148.865	242.022	149.111	289.675	220.774	215.78	251.832	387.279	42.7468	195.352	247.717	269.044	102.383	261.698	314.58	289.961	280.164	298.498	299.101	256.43	186.739	275.179	235.473	292.366
351.79	236.872	164.319	36.4901	150.488	309.063	41.4377	142.564	246.61	150.189	291.726	220.772	296.782	251.006	397.592	162.975	211.335	261.307	285.294	82.0402	256.333	314.525	289.883	272.018	297.211	302.412	255.844	190.596	267.553	229.782	292.722
353.06	235.575	163.412	35.9729	149.464	308.113	41.7396	141.93	243.572	148.143	288.518	225.559	298.419	247.469	384.873	163.14	208.378	268.998	285.005	87.926	260.224	305.766	291.561	274.751	299.586	300.05	261.386	184.309	262.122	230.063	293.27
354.33	241.163	164.241	36.3679	148.222	309.993	41.2075	142.395	248.979	152.61	293.38	213.831	295.828	245.667	401.849	157.109	205.589	262.178	284.229	88.1412	270.087	307.259	298.184	281.52	297.454	303.48	259.943	183.654	276.654	230.63	292.658
355.6	238.13	164.447	35.3295	150.085	305.899	40.7282	147.569	245.715	151.453	297.305	218.434	297.962	247.728	393.236	156.861	205.222	262.609	285.806	92.3175	278.399	308.322	286.145	277.087	300.325	305.392	260.76	186.078	276.099	231.808	290.621
356.87	237.835	155.877	35.4221	151.095	307.773	39.8656	143.254	253.712	152.853	287.72	220.829	294.531	240.536	399.942	159.171	203.492	261.26	284.066	88.7053	270.01	301.191	287.247	261.629	298.827	301.26	259.671	183.774	261.492	231.243	294.971
358.14	239.396	166.814	34.4139	148.918	301.233	40.2252	144.661	252.973	148.846	285.845	215.807	289.867	243.063	386.671	156.615	206.455	264.204	279.871	92.7923	266.935	301.014	287.956	262.924	297.166	299.489	263.308	184.507	266.109	233.294	296.13
359.41	237.754	162.997	36.0422	150.601	306.256	39.2189	145.274	243.927	148.117	291.468	225.55	298.015	232.794	393.352	150.712	197.197	258.717	280.853	80.3457	270.803	292.046	286.385	271.507	297.066	295.695	260.304	183.542	270.61	233.526	292.834
360.68	236.471	161.738	35.4284	150.82	301.435	38.6302	148.382	237.853	148.901	285.963	220.663	285.339	246.802	405.801	141.894	199.602	251.962	278.659	85.9962	261.513	305.007	282.139	272.226	298.705	302.385	261.389	182.662	265.986	235.64	289.477
361.95	238.41	160.519	35.1532	149.949	306.473	39.1947	144.337	245.963	149.461	287.797	218.143	290.91	239.957	399.074	142.74	199.658	256.005	282.181	88.3899	271.42	289.791	282.687	274.624	294.588	294.982	262.381	184.585	268.318	231.429	290.84
363.22	241.12	158.804	35.9618	150.494	303.527	38.2392	138.365	248.949	153.61	286.962	218.728	284.496	240.824	395.266	153.022	199.002	259.806	279.877	90.0551	273.346	291.65	285.764	266.056	294.933	300.096	260.689	184.665	271.835	232.374	292.76
364.49	235.486	155.537	35.346	148.39	307.163	38.9609	142.681	250.804	148.841	291.473	221.112	288.448	244.022	395.788	142.824	193.448	250.293	279.695	93.02	274.259	285.008	286.433	263.925	295.908	303.029	258.627	181.828	266.207	230.13	298.385
365.76	239.566	157.208	35.7676	148.928	300.478	39.4568	148.528	246.648	149.942	295.127	224.023	283.495	235.018	392.771	147.737	194.769	239.649	278.173	85.8265	263.97	297.179	282.695	268.861	296.504	298.562	263.18	182.101	265.853	230.037	295.995
367.03	240.207	153.632	36.0278	149.221	305.329	39.3398	146.683	253.864	149.999	291.009	222.12	282.096	236.207	384.852	146.226	184.14	255.315	278.619	84.5504	266.989	277.491	287.721	269.655	294.261	300.371	258.709	183.884	268.543	229.658	295.347
368.3	239.147	154.741	36.0693	149.712	306.449	39.7202	136.799	250.909	150.214	284.446	225.234	286.793	239.265	388.628	140.119	185.32	242.799	280.655	81.7395	273.096	295.438	279.372	270.46	292.864	302.285	260.541	182.904	266.733	232.589	295.263
369.57	234.412	151.634	35.7081	150.825	305.781	41.1558	135.572	252.327	147.798	287.313	224.412	287.884	240.329	387.125	139.611	184.152	236.93	285.334	83.5424	269.994	285.7	287.772	282.762	292.997	300.699	258.583	183.881	270.649	228.275	296.994
370.84	235.804	152.949	35.914	151.019	309.872	40.2046	135.143	238.834	149.979	284.675	222.157	279.955	242.032	384.317	129.766	186.33	250.656	285.318	79.503	263.958	292.25	273.315	272.478	293.004	298.871	258.402	187.407	270.568	229.998	288.401
372.11	237.4	148.986	36.1302	150.5	309.415	38.7962	133.886	236.252	150.195	281.652	229.134	295.858	240.365	377.043	131.178	184.347	253.782	286.162	73.7664	270.403	291.642	282.653	260.84	290.967	296.92	259.253	186.981	261.873	231.098	293.556
373.38	233.013	145.431	37.6272	150.476	303.578	40.5082	136.528	235.608	147.137	292.685	212.199	285.887	246.586	385.624	132.795	185.006	248.881	283.234	75.0706	274.229	299.301	280.004	270.644	294.393	300.955	255.34	186.84	268.555	228.869	297.374
374.65	230.014	144.251	36.2893	151.279	306.204	39.7106	138.637	243.161	151.188	279.404	220.011	287.141	252.95	377.479	128.527	181.465	241.621	282.769	81.0616	271.611	303.539	270.725	276.07	291.849	301.058	257.506	188.917	261.484	228.585	285.992
375.92	232.876	146.645	34.7724	151.598	305.812	40.4657	138.069	235.395	148.912	280.122	214.197	294.553	249.255	383.372	137.056	179.044	239.735	281.792	86.8747	268.212	297.043	270.875	258.989	291.32	307.755	260.18	184.508	263.536	229.887	287.567
377.19	236.02	143.298	35.1006	149.601	307.683	39.7863	129.637	244.392	147.793	289.998	215.659	293.492	250.14	377.761	127.057	180.768	242.886	278.994	83.0495	255.477	290.646	276.06	267.027	287.658	299.641	256.788	188.704	263.382	227.21	289.364
378.46	235.524	141.814	35.8004	148.701	312.778	38.2617	137.596	246.428	150.984	286.836	210.365	294.602	252.134	375.135	132.909	177.665	242.499	277.957	82.4417	272.565	294.664	265.951	259.284	289.484	301.234	259.927	188.251	261.693	230.073	291.552
379.73	233.524	139.508	35.8825	149.276	310.363	38.2945	133.541	239.836	146.81	285.496	212.215	289.438	249.954	375.397	128.525	175.37	249.12	274.913	85.3839	261.795	308.983	268.053	269.526	293.838	302.404	259.117	188.149	257.368	225.664	297.286
381	235.955	140.2	37.1771	149.748	311.5	38.7413	135.392	240.831	148.819	292.453	206.756	292.806	248.842	381.577	142.151	176.071	241.937	278.358	85.3498	277.584	287.567	276.097	267.494	289.053	300.299	262.178	188.163	262.958	228.598	293.938
382.27	234.87	139.866	33.8977	147.487	312.86	37.4522	141.192	244.947	145.964	284.148	202.075	285.297	254.941	369.948	137.644	171.39	236.497	274.224	80.9392	273.617	293.816	276.286	270.687	291.601	300.7	257.975	185.837	259.847	227.124	295.149

## Sheet: Panel c (titrations)
Concentration (nM)	Glucagon HEK293T			GLP-1(7-37) HEK293T						GLP1 (7-37) Neurons
25	0	0	0
50	-1.91501	4.71347	-0.676014
100	-5.90241	2.10866	3.20481
200	-8.60441	2.30712	2.52879
400	-0.341028	-0.099231	5.10766
800	1.20672	2.67924	9.16375
1600	12.4082	16.2491	27.1157
3200	58.9454	60.0099	68.3275
6400	100	91.5902	100
12800	92.6023	100	98.0471
1600				94.0162		98.5339
800				98.5294	77.879	96.9997	97.3177	99.7055	92.4843
400				99.3239	100	100	98.6303	99.1164	96.3491
200				100	94.0306	93.4879	100	100	100
100				85.5984	80.8718	88.6123	97.3891	98.4121	96.0068
50				48.259	44.3884	72.1787	86.1036	84.2746	91.6572
25				24.6957	18.7541	47.1872	55.8568	46.2799	68.9675
12.5				12.2718	15.0943	18.5476	23.5982	19.6824	38.9333
6.25				7.57268	3.05791	13.0924	6.26338	6.42848	13.6338
3.125				2.70453	4.87964	6.30753	0	0	0
1.5625				0	0	0
0.78001											0	0
1.5625										0	-11.3943	-14.1498
3.125										13.0374	-7.57121	13.7931
6.25										31.7829	14.1529	46.9679
12.5										52.4313	55.6822	79.1914
25										78.0127	85.5472	91.6369
50										72.3749	94.4528	94.3321
100										97.6039	98.1259	100
200										92.2481	100	95.4419
400										100	97.7211	100
800										93.0233	92.039	94.1736

## Sheet: Panel d (Ala-sccan)
	Concentration (nM)	GLP1 (H1A)			GLP-1 (E3A)			GLP1 (G4A)			GLP1 (T5A)
	1.5625
	3.125
	6.25	0	0	0	0	0	0	0	0	0	0	0	0
	12.5	-0.386905	0.646937	-0.281261	-0.2397	-0.208478	0.710732	1.15048	-1.633	0.634166	1.07247	-0.0845189	4.26822
	25	-0.892857	1.39023	1.59381	-0.449438	-0.264072	1.89529	0.337475	-2.96519	-2.98586	1.47081	2.62009	7.65805
	50	-0.357143	1.11493	1.65241	-0.209738	0.76442	3.61289	-0.859027	-1.60435	-6.051	9.57561	7.56445	20.0049
	100	0.342262	2.29869	2.08602	0.94382	0.889507	11.4902	0.291456	-3.02249	-5.76034	23.4411	19.4394	38.1294
	200	1.88988	2.53269	5.08614	4.53933	4.54482	18.0052	0.444854	-1.9195	-3.58039	52.03	45.1895	57.6519
	400	6.42857	7.08878	11.1684	17.6629	15.2884	33.0846	2.66912	-0.701905	0.237812	84.4645	68.6857	79.0177
	800	16.7411	15.9119	21.2704	49.3933	43.5719	55.141	5.84445	3.76737	5.06011	105.592	88.5054	88.4696
	1600	29.9256	30.1721	37.2554	87.2659	74.1626	77.8725	6.30465	5.93038	14.4008	109.376	93.2667	89.9542
	3200	43.4524	43.1108	51.752	98.412	86.7825	85.1812	8.59027	8.63773	20.8746	107.354	91.1537	94.4822
	6400	46.5327	45.437	63.0962	98.0375	91.9805	90.5473	8.4829	8.46584	23.1074	105.27	98.0279	94.7421
