# Supplementary material for: Optical tools for visualizing and controlling human GLP-1 receptor activation with high spatiotemporal resolution
Source: eLife. 2023 Jun 2;12:RP86628. doi: 10.7554/eLife.86628 (PMC10262203; doi:10.7554/eLife.86628)
Supplement: Figure 3—figure supplement 2—source data 1. [file elife-86628-fig3-figsupp2-data1.xlsx]

## Sheet: Panel a (GLPLight+PhotoGLP1)
Time (sec)	DFF GLPLight + Photo GLP1 frame20
0	33.8562	7.30223	16.0759	12.8173	3.90095	7.83741	37.9527	11.1959	12.3613	22.9587	-0.57903	-1.30549	-0.78814	4.0149	-4.25317	-1.12583
2.53	-5.54372	2.98096	0.161643	9.83169	1.47355	1.5976	7.68394	2.64525	2.57771	5.88805	-0.14752	-1.026	-0.41297	-0.11827	4.66316	-5.09581
5.06	1.40704	-1.24585	-0.83933	2.79695	-0.51811	-0.26118	2.39776	2.87595	3.57852	6.073	2.80564	-2.10725	1.3216	5.20656	11.6343	-2.66487
7.59	7.37926	-0.04309	-3.04198	-9.44745	1.15536	0.447591	3.81644	4.99126	1.98313	0.575136	-0.91954	6.56995	0.116298	0.718902	6.49	9.82766
10.12	-10.4856	-1.50974	0.236648	-6.03188	-1.27217	0.800737	6.00033	0.865144	2.59057	1.8298	-1.51047	-7.77705	0.964006	0.960833	1.1069	9.65198
12.65	-3.62364	-0.27043	0.131148	-7.16351	-2.62476	-0.52663	0.54246	0.953419	-2.04586	1.14092	-0.44424	-8.06932	-1.877	0.325742	-1.98533	-6.01173
15.18	9.1761	2.26165	-2.16958	-6.43492	-0.85106	0.716788	8.68522	-0.50755	-1.01108	1.4424	2.12022	2.16188	0.684171	1.89754	-1.56633	-10.1214
17.71	9.85885	4.52129	-3.34981	0.934661	-1.82463	-0.21896	-5.84714	-0.46686	0.920567	-1.98822	1.16109	-5.43247	-0.50681	-0.52177	0.782168	-1.2009
20.24	-13.2093	-2.92258	-5.87266	4.53833	-0.08149	0.145512	-5.3476	1.26813	-2.52414	-4.00579	-0.73519	3.96662	0.631382	-0.89759	-8.61496	-9.23997
22.77	-14.2519	-0.7947	2.24107	6.7892	-0.25856	-1.14141	-7.91336	-2.55034	1.44915	5.09921	-0.76559	-13.7711	2.19882	-2.39886	-4.6795	-2.46818
25.3	-2.6032	-3.4372	-6.43558	3.72499	0.123877	-0.05892	-5.18035	-3.89892	0.554719	-5.55786	0.63958	-6.55684	1.46118	-1.60871	0.960246	-2.36608
27.83	10.6525	-0.12122	-3.85669	2.56029	0.230596	-1.82919	-1.51266	-5.29162	-1.90886	-0.95319	2.25017	-5.43566	-1.53773	-0.71435	-4.00491	-7.43065
30.36	9.65428	-0.47605	2.14794	8.38795	-1.51113	-1.56272	-5.39422	-3.47707	-1.6786	-3.18602	-0.84726	9.32179	0.140994	-3.97584	5.83636	-9.25498
32.89	0.847524	-1.5734	2.88806	-3.32422	0.7846	-0.58224	-3.00757	-3.81556	-0.48237	-0.72044	1.90661	11.4667	-0.21769	1.47754	-10.8262	-5.75347
35.42	-13.2043	0.673247	-1.83455	6.83466	-1.13355	-1.60389	-0.31082	-0.97829	0.140763	-5.18703	0.807762	1.00396	-0.00686	-1.1772	-8.5762	-0.1949
37.95	-10.848	-0.38641	-0.58384	1.18889	-0.06863	-1.34561	-6.97719	-2.10602	0.062928	-2.97514	-0.35573	8.9832	-0.31533	3.39799	7.3919	-1.67088
40.48	14.3842	0.439234	-1.24524	-5.20511	0.249753	-1.04425	-7.63953	-1.94932	-3.75664	-6.08365	-1.86892	0.73564	1.98155	0.611025	-5.65892	-1.01622
43.01	-12.9579	-4.71103	5.72945	-7.57793	0.48691	-0.23992	-7.01345	-0.4388	-2.72919	-2.74708	-1.64732	6.99957	-0.04798	-2.07557	3.50357	5.03034
45.54	-6.59865	-1.63056	0.390769	-9.56837	0.797121	-0.90477	-7.90521	-1.3099	-6.69167	-4.42474	-0.66533	1.7578	-0.88938	-2.95976	12.9458	38.8067
48.07	-3.88983	0.943647	-0.7734	-5.65157	0.941374	-0.22594	-3.02976	1.99516	-3.39092	-7.17804	-1.20492	-1.48597	-2.90012	-2.1631	-5.14879	2.29911
50.6	1.11373	-0.54137	-0.43136	3.02534	0.604293	-1.6848	-5.15001	-4.73015	1.60674	-2.78425	3.26969	8.78037	-0.10559	-1.96235	-1.99685	5.182
53.13	-8.83424	3.49929	0.321535	-4.67598	-0.10579	-4.061	-8.17682	-2.80959	-7.6247	-4.69778	-0.66704	5.45356	1.2072	-5.58933	-12.1817	-9.8736
55.66	-8.51135	-4.00285	0.483489	1.21266	1.02631	-4.2728	-8.18199	-1.2633	-3.90045	-6.53103	-0.12944	-2.45542	2.64795	-2.03805	-4.37154	-11.267
58.19	-0.18769	-5.6768	0.620719	-5.72391	0.128716	-5.10935	-0.21535	-0.479	-3.7987	-7.5948	-1.91534	4.06884	0.809292	-0.57296	-4.33382	2.63394
60.72	5.02044	-2.4679	-0.55087	3.96889	1.35807	-3.80161	-0.68751	0.016854	-5.04175	-1.66019	-2.7399	7.18484	0.307238	0.240538	9.98132	-2.73845
63.25	-14.1089	-4.16078	-2.18771	-2.54809	0.925327	-6.01339	-1.7147	-2.53689	-3.73939	2.97229	-2.76084	-8.01183	0.968684	-2.78836	2.15963	-15.5718
65.78	-4.50357	-0.54026	1.87101	4.39364	0.634866	-5.85754	-8.86062	0.031292	-3.95513	-3.89176	-0.57013	6.83986	0.940862	1.24578	-3.26852	-5.83305
68.31	16.43	-2.4113	6.39869	0.837515	-0.566	-5.97055	-6.42585	-0.26422	-4.51072	-3.2788	-0.90715	-4.50454	0.697334	3.96405	5.73266	-6.92164
70.84	5.50108	-3.2325	-3.44583	0.142001	-1.38027	-6.53869	0.916921	-2.69851	-4.29937	2.10378	0.363797	1.84724	-0.93769	2.1113	1.881	-14.6754
73.37	11.3649	-4.47052	-2.83305	2.81039	-1.386	-7.62051	-1.78204	0.243116	-5.16833	0.652306	-2.24374	0.857015	2.46855	4.14179	0.289845	-11.5928
75.9	4.13804	-4.49371	1.53021	13.0323	-0.38749	-6.63782	-7.65582	-1.02768	-6.44649	-2.09132	-3.00144	-3.33545	3.26848	4.36055	-2.87047	-7.13486
78.43	-12.6325	-1.89223	1.31634	3.09871	-1.30565	-7.71127	-0.49509	-3.21356	-5.5428	0.471103	-3.57998	-7.37458	0.802241	4.97462	-4.8471	-3.40812
80.96	-4.82646	-4.59133	0.976357	13.0354	-1.68701	-8.35689	-6.02549	-4.20804	-3.16001	0.464854	-2.37882	-2.66145	1.91227	2.32389	-2.0178	0.318617
83.49	4.47818	-5.13341	-0.04152	6.27763	-2.77429	-9.96357	0.368542	0.031615	-5.24924	-1.66019	-4.92726	-0.60276	0.994064	6.7	-7.36529	-2.58529
86.02	7.92398	-5.64376	-1.01406	8.23396	-1.58938	-6.47773	-1.18186	-3.37173	-2.24872	-3.40876	-2.98727	-4.44385	1.44163	2.10547	-1.00696	0.938744
88.55	-0.03488	-2.82663	-2.90434	17.5423	-2.48573	-8.1309	-1.52228	-1.49793	-7.65647	-1.34371	-3.44405	-0.31208	3.19568	5.45566	-16.3623	-3.4877
91.08	-12.0705	1.00489	0.025654	6.40475	-3.33094	-6.25858	0.758554	-4.31256	-7.57518	-7.16398	-0.72031	7.50106	-0.22617	4.94612	-11.7994	-15.3045
93.61	-0.05706	0.483213	4.06542	7.04549	-1.43643	-8.59548	5.671	-2.99401	-4.56693	-2.29563	4.19963	32.5041	12.9594	13.1676	-14.5585	-17.6995
96.14	-4.67117	0.059166	3.44274	8.36212	-2.32091	-7.61178	-1.35059	-1.91552	-7.08711	-6.49448	-2.95444	0.884167	1.19091	4.96146	-20.7513	-9.83156

## Sheet: Panel b (Preincubation Exendin9
Time (sec)	Norm DFF GLPLight1 Ex-9 preincub
-43.68	0.0325258	-1.69569	-0.0575563	-1.74268	-0.664922	-0.981006	1.43803	-0.0177022	-0.60942	0.763154	-1.0731	-6.55112	0.514389	0.760198	1.74763	0.952247	1.56644
-42.56	-1.04169	0.849462	-0.713557	-1.60519	-0.368962	-0.518647	-1.34108	0.448332	0.062143	0.304469	-0.182929	-4.58762	-1.41899	-2.84024	-1.02912	-2.08586	-1.90521
-41.44	-0.412862	-1.49013	-0.716187	0.732172	-1.09128	-0.716402	-0.928666	0.3686	0.622893	0.787244	0.205703	-0.4558	-0.0968052	-1.66152	-0.602239	-2.10269	2.49398
-40.32	1.0655	-1.3234	-0.772449	1.4468	-1.01086	-0.217559	4.25315	-0.206311	-0.384728	0.191263	0.304333	-4.50134	0.0682266	0.509326	1.04815	1.779	-2.67485
-39.2	-3.95391	0.294715	0.168433	-0.903198	0.063517	-0.247482	-2.31117	-1.22437	0.194443	0.559041	0.0429855	-1.41166	1.1975	0.436794	-0.405269	-0.375445	1.75857
-38.08	0.545214	-0.400159	0.112429	0.214325	0.0597722	0.346491	3.58215	-1.00576	0.304029	2.18755	0.310088	-4.81121	0.533888	0.612238	0.269338	3.71784	4.66265
-36.96	-0.79168	0.606848	0.184357	1.05631	0.400539	-0.479185	-0.439124	1.60663	-0.842389	0.158708	0.280836	-5.35667	-1.40053	2.84508	0.315052	3.01052	1.33234
-35.84	-0.961367	-0.497461	0.421924	3.32914	1.02589	0.319779	-1.93455	-1.58645	-0.341925	0.704801	-0.365646	4.94776	-0.603022	-1.92892	-1.3434	-0.375445	-1.84558
-34.72	0.725396	-0.488896	0.107262	0.138072	0.60444	1.11579	0.0275036	-0.676221	0.327476	-0.346854	-1.06688	-1.71253	0.530477	-1.74562	4.0054	-1.90832	-2.83937
-33.6	-0.32458	0.355967	0.239535	1.44384	-0.0221723	0.0230314	0.122425	0.788127	0.372497	2.09884	0.131124	-0.596851	-1.63236	0.0774318	-0.486613	-2.39764	-5.15933
-32.48	1.51667	0.299995	-0.113075	1.66748	0.697734	-0.303357	2.57443	0.873712	-0.0191706	-1.14076	-0.975968	2.93849	0.230663	0.16257	1.39167	-0.212739	-0.251099
-31.36	4.93362	1.87499	0.562685	-1.14311	0.645953	0.428446	-0.710386	-0.473925	0.61249	-0.340833	0.385605	1.70653	0.0830535	0.739947	-7.02866	1.12457	0.702943
-30.24	2.25441	-0.803517	0.647852	0.123504	-0.285648	0.530604	0.330068	0.256007	-0.197621	0.32392	1.0222	-0.172939	-0.434506	0.274574	-0.558543	-0.290887	1.3467
-29.12	2.73706	0.538624	0.0931967	-0.977745	0.547685	-0.108056	-1.01541	0.00995123	-0.0138463	-0.245285	-0.174571	3.31139	0.308138	2.10362	0.897561	0.177593	2.71813
-28	-0.630311	1.33449	0.427412	-0.554931	-0.100311	0.0984511	-1.54279	0.30744	0.135228	-0.619494	0.716628	2.8342	-0.999439	-1.49392	-1.56087	-0.499678	4.5434
-26.88	-0.70991	0.471697	-0.552844	-3.70127	-0.625256	1.01121	-0.751097	-1.18485	-0.0369413	-1.85565	0.00895622	-1.57672	-0.481509	0.344628	0.425639	2.5793	0.423578
-25.76	-1.58839	-1.54689	-0.926562	-0.377839	-0.358352	-1.12843	0.20978	0.36315	1.18406	-1.52815	-0.0347065	-3.22735	1.27082	-0.0980133	3.0192	-2.12273	-0.849581
-24.64	-2.67961	-0.519871	-0.425882	-0.411755	0.0944007	-0.606821	-0.706501	0.609247	-0.904465	0.506954	1.1838	6.45133	0.493111	2.34478	-2.28624	-0.71889	-1.40169
-23.52	-1.31667	2.52116	0.481137	0.346461	0.43678	0.41206	-1.07903	0.225004	-0.142915	-2.33541	0.119141	7.72757	1.20195	0.334916	-0.191156	-0.480843	-4.84131
-22.4	0.60057	-0.381933	0.83189	0.919621	-0.0489429	1.02108	0.222258	0.519383	-0.321835	-0.173504	-0.837597	5.04455	0.634939	-1.77786	2.37249	0.230091	0.219297
-21.28	-3.4329	-0.0511761	0.209177	0.572266	0.0952777	-0.250723	-4.91844	0.107767	-0.739983	0.0245854	0.708656	5.33941	0.961888	-1.32365	0.105981	0.127499	-2.6097
-20.16	-0.798191	-0.230449	-0.172855	0.354998	-0.0980707	0.824453	-2.49569	1.81991	0.00630626	0.0544538	0.922116	2.0224	1.97365	3.51937	-0.270483	0.333086	-1.5364
-19.04	0.890019	1.6438e-05	0.159576	0.795794	0.00886497	-0.596393	-2.12746	-0.0294909	0.176138	-1.85174	0.604782	5.74381	1.77489	1.30244	0.774876	0.932211	-1.1168
-17.92	-3.62068	1.17553	-0.0275059	1.55026	0.28048	0.792099	0.0939918	-1.00124	-0.627852	-1.17494	0.920327	6.07994	0.131095	1.19561	0.971846	2.71917	-2.71239
-16.8	-1.78594	-0.103863	0.794252	1.71619	0.333615	-0.132834	-2.97582	0.0435786	-0.873097	-1.13026	0.119269	5.4572	1.94415	2.79486	-0.793161	3.31629	4.72338
-15.68	-1.35249	-0.765968	0.24268	2.09769	0.255169	-0.144488	-4.97838	-0.966685	-0.374552	-3.01448	-0.505422	1.72678	0.210275	0.94267	3.68271	-0.2981	1.11261
-14.56	-1.57645	0.734328	0.120009	0.930092	0.866555	0.675568	-0.149451	1.0339	-0.338431	-3.17221	-0.0291205	3.10206	0.293754	1.56737	-0.0294784	0.962267	-0.770077
-13.44	-1.70236	-0.0631285	0.804595	0.864079	0.32795	0.227058	-1.41371	0.829505	-0.528767	-2.29569	1.13878	2.60312	1.858	1.8854	-0.820387	-1.8967	1.69784
-12.32	-4.25493	2.7329	0.553477	0.718399	0.935098	0.914457	-0.678883	-0.335699	-0.489442	-2.98128	-1.17024	1.2466	1.20017	2.10011	-0.297371	1.97336	0.0492468
-11.2	-3.88951	1.1593	0.960205	2.06935	0.209341	0.0290656	1.60987	1.81628	-0.847296	-2.44031	-0.044045	3.14707	0.468349	0.742014	2.45618	-1.56328	-2.91998
-10.08	1.57637	0.815301	0.777351	0.161631	0.525507	0.865745	-2.10782	0.550064	-0.318858	-2.08621	-0.460948	4.67091	0.17669	-1.46458	-0.196533	-1.48272	-1.34206
-8.96	-4.39532	1.06339	0.403611	-0.325486	0.518721	0.307707	3.48375	1.31528	-0.677817	-2.62742	0.367397	-1.07854	-0.617776	-1.95909	-6.16347	-1.43063	3.2062
-7.84	2.08363	0.574879	0.887637	1.96134	0.872732	0.573462	-1.50945	0.880857	-0.5709	-2.36772	-0.60128	7.17386	0.895385	-3.38621	-0.305775	-0.666391	-1.59382
-6.72	-0.125223	-1.05549	0.117007	-0.687751	0.630957	-0.432664	-0.440965	0.77876	-0.628406	-3.3314	0.688826	2.95725	0.717156	-2.75345	-2.82606	1.73452	-4.70218
-5.6	-2.89091	1.46327	0.223882	0.224455	1.15385	1.07209	-0.282421	2.36402	-1.48816	-3.09498	-0.698288	-4.07743	-2.00705	-2.73919	-2.46103	-3.79707	0.153043
-4.48	-0.445064	-0.363009	0.434703	2.0524	0.529108	0.723263	-0.196503	1.17883	-1.15562	-2.61098	0.402663	8.98355	0.339571	-2.38272	-1.91415	-4.67712	-0.0942992
-3.36	-2.91117	-0.992151	1.09856	0.896175	0.849447	0.99474	0.441764	0.845372	-0.836079	-2.38668	2.32045	1.37415	0.391172	-0.0163861	-1.47449	-4.70517	1.09162
-2.24	-2.23386	0.987701	1.87533	1.60272	1.12886	0.471202	-0.0226151	1.16886	-0.709293	-1.86191	1.45394	2.82295	0.73169	-1.8163	-7.63067	-1.76045	0.45339
-1.12	-3.84211	0.96828	1.22788	1.84013	1.15224	0.241694	-3.51241	1.22114	-1.13675	-1.10373	1.15225	2.19796	0.3458	-1.97562	1.63099	-0.62311	1.18659
0	-3.9123	2.67753	0.704992	0.809222	0.358881	-0.00681282	-1.364	-0.0693362	-0.548232	-2.01093	1.04202	5.22386	0.502677	-4.24483	-2.31784	1.567	3.70088
1.12	-11.8512	-3.99434	-2.94327	-3.80336	-2.72249	-3.71858	-4.78015	-3.90657	-4.46864	-5.86889	-2.24586	5.72356	-3.79156	-7.66156	-3.46268	-3.4949	-1.34096
2.24	-6.25575	1.37154	-0.842159	-3.26014	-0.616518	-0.794725	-3.71392	-3.67221	-3.79003	-6.0184	-2.68328	2.14319	-1.47808	-8.1445	-4.00217	-0.246802	-1.02957
3.36	-6.3169	0.36732	-0.772603	-2.25199	-0.00593187	-1.86323	-4.42235	-2.03347	-3.04165	-5.69571	-1.16585	7.83036	-1.59677	-6.1832	-6.2196	-2.14317	2.01033
4.48	-5.91239	1.4781	0.0312218	-1.40374	0.100626	-0.146133	0.0485771	-1.0161	-3.31814	-3.37282	1.47713	2.35027	-1.04385	-3.82906	-4.96417	-1.50156	-0.468627
5.6	-5.3259	2.14908	0.811648	-0.556412	1.25369	0.372206	-0.279966	-0.833139	-2.65352	-4.72414	0.680129	-0.103166	-1.20035	-3.91792	-5.34803	2.23586	0.791278
6.72	-1.64302	3.13278	0.988481	-0.730089	1.88607	0.280633	-0.537116	-0.915416	-1.98528	-2.87051	2.48662	5.47296	0.19997	-6.40266	-4.58737	0.391597	-4.6812
7.84	-2.86196	3.01515	1.0058	2.00368	2.59779	1.78482	0.141451	0.112531	-2.43997	-1.68238	2.71756	7.2759	0.271068	-4.67053	-3.21899	1.50729	-1.76056
8.96	-1.47188	1.33449	1.22503	2.04431	1.52324	1.94207	1.57734	0.322013	-2.79853	0.194274	2.13875	5.96365	-1.62583	-4.7472	-4.51745	-0.993004	2.66513
10.08	-0.669026	1.34425	1.35775	2.39759	1.89276	1.62444	2.58425	0.244097	-1.56178	-1.47745	3.18935	8.36981	-0.105405	-4.55563	-5.33424	1.65597	2.18811
11.2	0.927647	1.1095	1.71273	2.01256	1.93022	2.08165	11.6047	5.40389	2.07735	3.70172	6.77819	21.0819	1.21566	-5.01894	-0.910804	-1.24067	6.96604
12.32	-3.99226	2.48949	1.94787	2.72355	1.48753	2.11369	-0.870978	0.261256	-2.86348	-0.520122	1.97633	12.5474	0.599724	-3.46019	-5.19072	4.00798	-0.0976114
13.44	1.5098	3.94308	2.33514	3.46207	3.13202	1.7211	0.949718	-0.182454	-1.52359	-0.3637	2.50014	12.5677	-1.65934	-4.39755	-0.538376	1.65276	1.66692
14.56	-1.46392	2.39269	2.10779	1.11572	2.24581	2.61742	-0.27158	0.34022	-1.04413	-1.90008	2.14093	2.19421	0.305542	-3.02747	-4.4472	-0.375043	5.70282
15.68	-1.63217	4.50639	1.82687	1.37134	1.97518	1.74619	4.00194	0.300737	-2.26308	-1.90301	3.04722	10.5209	0.40763	-2.9198	-3.27277	1.58864	-1.4845
16.8	-0.106046	3.52737	1.47235	7.10316	3.80313	2.6378	1.49552	-0.57699	-1.67969	-2.54351	2.48163	7.23838	-0.288379	-4.3804	-2.93967	3.47258	2.43214
17.92	-3.60114	2.34179	2.27443	2.40977	2.94916	2.40077	-1.25209	-0.0732915	-0.367771	-0.550805	2.34949	7.98792	-0.905284	-4.80155	-3.41092	2.02226	-3.13972
19.04	-1.25407	1.54892	1.48196	3.2497	2.5069	2.91592	1.17516	1.07867	-1.20361	-0.851928	2.31861	5.12108	-0.929451	-2.57015	-3.52487	-0.740931	1.50239
20.16	0.382761	3.24482	2.35676	3.48939	3.28632	2.41146	0.213051	1.24407	-1.88832	-3.69047	2.59612	9.99193	0.362333	-3.156	-3.31345	1.47363	-1.07815
21.28	0.537252	2.69097	2.28088	3.44125	3.27653	2.938	0.19914	1.24613	-1.39838	-2.8203	2.7788	6.75145	-1.57898	-2.19488	-6.12213	7.80993	3.07479
22.4	-1.05725	2.79425	3.12673	2.83542	3.62123	4.05928	-0.946873	0.32839	-1.52974	-0.819129	2.50777	7.04331	-1.60515	-2.22195	-4.95341	-1.7388	6.74299
23.52	1.69288	2.99145	2.90177	3.95932	2.83138	3.50487	0.328839	-0.0955358	-1.56404	-1.38069	3.14726	5.49697	1.46558	-5.93191	-5.38533	5.24832	0.314259
24.64	-4.65329	4.06707	3.33862	2.65685	3.87075	3.12985	2.46785	0.0454766	-0.939129	-3.04582	1.4075	7.89113	-0.553423	-5.24357	-3.91007	0.220074	5.31966
25.76	-1.07244	4.9228	3.23136	3.22682	3.77883	3.093	0.52973	0.271994	-1.93585	-3.55065	1.91996	4.6604	1.54187	-4.67012	-2.42237	-0.018375	4.01558
26.88	-2.5613	3.73214	3.99052	7.51527	3.51676	3.0306	3.88922	0.0768052	-1.60475	-2.44031	2.86745	3.64602	2.72289	-1.48814	-4.30906	2.71436	-1.63247
28	-1.34959	3.95633	1.86375	3.0651	2.96096	3.64403	-0.29981	0.366217	-1.48796	-0.750359	2.70247	17.5638	0.555165	-1.80659	-3.3242	-1.60175	3.81462
29.12	0.727204	4.45908	2.15688	2.88687	3.35014	1.57293	3.80105	-0.835805	-1.97239	-1.04676	1.99599	8.83424	-0.240858	-2.91443	-6.42363	0.591971	-1.57726
30.24	0.134559	3.7409	3.69061	4.929	3.05212	3.55806	0.959536	-0.0826172	-2.08738	-1.61263	2.59425	8.0742	1.31731	-3.68461	-4.16755	1.60628	1.08389
31.36	-2.47229	4.71813	3.97134	4.21847	4.04423	3.72667	3.62859	-0.504447	-2.36536	-1.80682	1.36256	3.68578	1.93028	-1.47181	-4.39914	3.02534	1.33124
32.48	0.809335	2.8071	3.30668	4.42367	3.46981	2.33711	3.08218	0.73835	-2.12203	-2.77196	3.66296	8.76446	0.396731	-1.32261	-4.84518	-1.42461	-1.9814
33.6	-0.127032	5.75372	2.72079	5.26486	3.18275	2.96939	0.986132	-0.705731	-2.04001	-2.21081	1.29378	8.22351	-0.351768	-0.584464	-1.97734	0.236505	5.37045
34.72	-4.35335	3.0772	3.25015	6.6396	3.31047	2.19358	1.83163	1.43898	-2.14691	-2.67454	2.01957	5.84885	1.9047	-1.72083	-1.59214	2.10241	-0.914731
35.84	-0.855357	4.16358	3.32251	4.0877	3.55182	2.83365	1.3517	0.483654	-2.19924	-0.48	2.4966	9.47724	3.43692	-0.71858	-1.63314	1.38466	5.54602
36.96	1.58795	2.29239	3.10457	5.70372	4.05556	2.75	-1.81978	0.44712	-1.59711	-3.2225	2.75816	7.98492	0.558502	-0.846289	-3.04555	1.92528	6.25493
38.08	1.3781	3.80116	3.81116	5.73843	4.71117	2.30724	1.05344	0.0301358	-1.90625	-1.53882	0.263056	10.8555	2.48239	0.0224631	-1.64827	2.99569	3.48666
39.2	-0.285504	2.50592	3.10802	4.16634	3.95435	3.96391	0.789945	0.19311	-1.85437	-3.28607	2.18741	3.67452	2.94686	-0.0517241	-3.59579	1.89722	3.07921
40.32	1.1451	1.24107	3.07857	5.83472	3.76178	4.03168	0.870344	1.84369	-1.67907	-1.69735	2.01518	7.03881	2.72682	2.13173	-2.36288	2.39456	8.22705
41.44	0.937779	3.61422	3.56007	5.31129	3.75867	2.15059	0.567779	0.911417	-1.7387	-2.33696	3.68991	6.29603	3.18833	-0.129837	-1.38004	0.726624	3.077
42.56	-2.37424	5.39298	3.32187	8.60605	4.35046	3.20642	3.29616	0.468879	-2.23126	-1.36823	1.39765	7.56251	0.0282643	-3.33455	-3.65697	3.39884	-1.67885
43.68	0.503604	5.80292	3.99291	5.48122	3.90117	2.98311	1.38443	0.857603	-2.24013	-1.80039	4.30531	10.2688	3.64473	2.08957	-1.97196	0.578346	7.25093
44.8	-1.7711	2.87064	2.74569	4.58711	3.42356	3.97818	1.8122	0.0972313	-2.19676	-3.08968	3.01767	7.44321	1.34807	0.835832	-0.414008	-0.113754	-2.28285
45.92	0.00141153	3.71063	2.93759	7.28139	4.25872	3.56825	1.39978	0.470212	-3.40342	-1.84824	2.68831	9.21764	3.15949	-0.642327	-1.41197	3.1111	4.45285
47.04	-1.27723	3.43375	3.62434	5.62416	3.95641	3.51708	-0.407824	0.982591	-2.55131	-3.38283	1.8673	5.00704	2.03029	-1.86796	-1.09937	3.83125	2.12296
48.16	-3.41698	4.83316	3.30129	6.03105	3.28389	1.96413	-0.646971	-0.319267	-2.47516	-3.42662	1.72906	6.72294	1.15939	-0.901463	-2.11112	2.17775	7.43312
49.28	-0.487757	4.15133	3.67703	7.74859	4.39487	4.23531	3.11614	-0.0451938	-2.06195	-2.82225	1.6106	6.78971	2.45244	-0.933287	-1.1992	5.79454	-2.64503
50.4	1.71929	5.34926	3.48872	6.24251	3.94667	3.20034	-1.02297	-0.662375	-2.68709	-3.23113	1.36622	1.53846	1.88773	-0.540861	-2.17834	1.26604	3.61144
51.52	-1.57319	4.69403	3.52511	7.10008	4.58502	2.58188	4.15577	-1.02922	-2.8002	-3.22364	0.133469	8.63241	1.56545	-0.421212	-1.81835	-0.635132	-2.18237
52.64	-5.05743	5.45135	3.9352	5.94273	3.37928	3.42404	1.10151	1.57244	-1.54244	-4.78371	2.55024	7.93465	2.87955	0.911878	-0.920888	2.98687	6.2218
53.76	0.129129	3.98351	3.11149	6.12608	3.59948	3.19874	-0.098511	-0.698062	-2.39703	-3.21518	1.47577	3.58599	1.78682	0.52834	0.539921	5.58414	0.271194
54.88	-1.89086	2.55781	3.5528	6.76809	3.34998	3.24042	0.00418458	0.000908164	-2.11834	-3.61372	1.95983	6.45959	1.80439	0.259282	-0.52224	1.20312	7.42539
56	0.767725	2.81885	2.89025	4.60236	3.34176	2.84055	-2.04154	1.25521	-1.53597	-3.86284	1.90828	8.38257	2.73594	-1.17961	0.253878	2.23827	3.03725
57.12	-0.585808	4.07734	2.57783	6.72746	4.16657	3.75727	1.34884	1.07512	-2.17656	-2.73867	2.42854	-0.0776549	1.1204	-2.51725	1.51805	0.305033	0.455598
58.24	-0.16068	0.821875	2.55825	6.04049	3.11531	3.64759	2.16856	0.737463	-1.52085	-3.44892	1.76326	9.15311	1.69571	-1.26682	-1.1871	0.989918	0.868575
59.36	0.724311	2.74615	2.70359	4.40012	3.91916	2.42267	0.444424	1.06523	-1.9672	-3.25547	2.00819	9.35794	2.30549	-0.56008	4.39497	2.47511	0.982309
60.48	1.59012	4.12255	3.89233	7.53928	3.61823	3.97452	0.316769	1.00197	-1.93522	-2.01256	1.65687	3.81033	3.41868	-2.11904	1.59503	5.31043	5.31855
61.6	1.85207	2.24419	3.47053	5.96367	3.76038	2.99772	0.18748	0.571905	-2.26541	-3.98882	1.72701	4.54636	4.05568	0.562436	1.44242	-1.29597	-0.798788
62.72	-1.22042	3.4455	1.64709	3.50919	3.36675	3.62841	-2.17185	-0.255765	-2.1189	-1.85589	-0.0927433	7.7951	0.260319	3.96119	-1.51281	-3.79947	3.64457
63.84	-0.855357	4.06309	2.85875	5.59981	3.58209	2.57568	-0.452217	0.172158	-2.39406	-3.56709	1.87276	-1.05678	1.49316	-1.52678	1.36948	4.74056	5.76576
64.96	1.73413	2.34408	2.47693	4.64902	2.30525	2.9852	1.22937	-0.00547154	-2.51315	-3.79049	1.68812	7.72307	2.45933	-2.32693	1.48444	1.62752	0.0967285
66.08	-2.22518	3.37838	2.4247	4.75954	3.11868	3.12165	-1.01929	0.57473	-1.86546	-3.40757	2.96748	3.84034	1.88098	0.187369	-1.06845	6.90743	2.76782
67.2	-1.02468	1.88684	2.95659	5.40701	3.41613	3.58683	0.506613	0.102075	-1.93332	-4.1533	2.46308	9.8929	0.980497	-1.61977	4.25144	4.93533	0.47989
68.32	-2.11048	4.71006	2.78748	5.5223	3.38599	3.08143	3.40663	-0.760273	-1.51271	-3.47073	1.99377	7.03131	1.39812	-1.59374	1.9046	2.98446	2.60108
69.44	-0.335074	2.18643	3.14174	5.68881	4.07312	3.49115	-1.66063	0.245512	-2.42792	-4.38842	1.61627	1.93461	2.18079	-0.689028	3.06088	0.807176	5.23022
70.56	-4.27049	1.64084	2.72936	5.32803	3.10099	2.91968	-0.0185228	-1.26894	-1.87009	-2.67739	0.866767	5.81359	1.31293	-0.69089	0.242449	2.50396	1.20757
71.68	-0.772502	2.69914	2.48125	6.56312	3.37401	3.37261	-1.48101	0.507232	-2.03186	-3.42035	1.31616	3.69478	2.59634	-0.799585	1.19604	-0.923274	-6.37727
72.8	-0.59811	3.67915	3.24269	7.48283	4.49996	3.12585	1.16881	0.714816	-1.20151	-1.08575	2.12549	7.00805	0.796189	-1.39515	-1.22139	-1.16533	2.75788
73.92	-3.25634	1.96144	3.5584	5.15856	4.06151	3.41602	2.0227	0.52782	-1.88441	-1.37238	1.87208	11.3417	3.85291	-0.0895411	-4.10839	4.43198	8.91608
75.04	0.973959	2.94912	3.83338	5.83631	3.67159	2.08546	-0.248669	0.400774	-1.87065	-3.10677	2.09739	12.6832	0.615367	-0.950646	0.495889	-1.74402	2.31399
76.16	-2.72918	2.84634	3.17561	5.04816	3.00858	3.46829	1.01907	0.466295	-2.32106	-1.29678	2.21653	4.44507	0.798191	-1.02876	-4.9477	5.65428	3.61255
77.28	-0.586893	4.92738	3.22585	5.03769	3.08511	3.31517	-0.302062	0.791923	-1.14535	-3.16057	2.31883	4.47433	0.922148	2.25923	-1.71617	2.96002	-0.78112
78.4	-2.22192	3.38664	2.67536	3.70757	3.52898	2.24396	1.28603	0.825509	-1.32029	-1.05628	1.96802	6.14147	0.596534	0.358473	-2.42943	0.377168	7.53582
79.52	0.230436	3.28515	2.21813	3.28692	3.16862	3.16147	-1.15329	-0.722767	-2.52748	-3.04574	2.41673	3.24836	3.2472	-0.493333	-2.76522	2.84981	5.42235
80.64	-5.69567	0.830239	2.79467	5.00526	2.93762	3.79052	-1.18356	0.478931	-1.7798	-2.75877	1.2931	7.45372	0.52462	-1.81279	-0.617365	-1.07636	-1.21177
81.76	-0.192881	3.35995	2.65297	6.06508	2.86395	2.48699	-2.56668	0.0541164	-2.21321	-3.47765	1.53014	1.25635	0.450037	-3.56641	-5.42567	7.44925	-2.14372
82.88	-3.30627	1.71335	2.0555	3.91231	2.21267	2.49017	0.0385516	-1.00443	-2.28148	-3.46731	1.63729	5.42194	1.88231	0.834592	0.475722	4.23642	2.27424
84	-0.55433	2.119	2.67592	6.90046	3.4542	2.90575	-1.05714	0.710657	-1.67731	-3.54129	1.11882	4.04067	1.56018	0.107396	-1.18408	3.70622	-0.185949
85.12	1.7059	2.37067	3.30212	4.91113	3.75938	2.38496	-2.26862	0.630764	-2.24167	-2.4946	1.76952	4.06317	-0.018665	-2.17731	-4.11175	2.35769	1.38314
86.24	-1.60684	2.35145	3.26451	6.99139	3.83346	2.82267	-0.0886923	-0.0986049	-1.98655	-2.83373	2.09445	4.08418	0.70055	-1.26041	-0.827108	0.258144	9.72547
87.36	-3.94776	4.60718	3.85384	5.49385	3.01243	3.00093	0.792811	-0.386121	-1.59578	-0.737745	1.38712	4.44357	0.408074	-0.68345	-2.80724	4.0176	4.03546
88.48	-1.83406	2.20804	3.80959	5.828	3.11253	3.63654	2.40811	1.24031	-2.0641	-3.29526	2.6397	9.86889	1.12714	-1.08724	-3.38807	1.00916	6.72201
89.6	-1.25443	1.57202	1.31413	5.27989	2.77678	2.20361	-1.6146	-0.398637	-1.65069	-2.64052	0.897725	3.55748	0.928155	0.205968	0.00043761	2.38814	-2.07526
90.72	0.596591	2.16909	2.10103	5.37105	3.62273	7.66034	-0.15477	0.413572	-1.54943	-2.25549	2.87354	4.34828	1.36653	0.750486	-5.24214	0.907364	-0.749099
91.84	1.86402	1.3058	2.54713	5.34476	3.04848	2.73181	1.33738	0.675615	-1.40223	-2.66811	1.47325	11.0453	-0.720235	-1.13415	-1.31752	-0.462007	4.06859
92.96	-0.344119	1.80049	2.68969	6.83786	3.29411	2.61081	-1.6819	-0.792811	-1.36984	-2.68626	0.286253	-0.268228	2.1435	-0.922336	-3.86604	2.14569	2.33828
94.08	0.556793	2.89823	2.90691	3.34576	3.7499	3.71946	0.51459	1.30139	-1.60069	-3.28118	2.17551	2.28875	1.694	0.34442	-4.15309	3.84448	-3.13641
95.2	-2.59277	4.34923	3.2242	4.0572	3.66293	4.27888	0.959128	1.11904	-1.55018	-2.73241	2.72371	7.35243	1.99953	0.958375	0.413873	3.84809	-2.90342
96.32	2.27141	4.56615	4.27281	7.15141	3.1062	3.6081	1.88175	0.0219813	-1.65144	-2.75495	2.80856	5.03404	1.0166	-0.820458	-3.31949	4.1715	-1.81246
97.44	5.09137	4.78147	3.89489	7.0928	3.91143	4.11097	3.09527	0.803064	-1.91477	-4.30631	1.72002	2.6939	2.24885	-0.468121	-2.77867	5.43947	3.86099
98.56	-2.50413	3.35876	4.41995	8.09959	4.54489	3.67017	1.20339	0.604847	-1.60967	-2.11551	1.69465	2.27899	1.62364	0.844924	-1.12156	0.036528	0.744901
99.68	-2.33661	2.85969	3.34178	4.67031	3.78829	3.95782	2.17224	0.100742	-2.01618	-3.47521	0.635994	2.19871	0.495929	-2.00228	-1.8086	2.22063	4.45948
100.8	1.02751	0.583144	4.06902	7.10953	2.87671	4.03481	-0.332339	1.64943	-1.78844	-3.26019	2.19636	5.6958	1.26637	-1.63548	-4.38939	-0.619103	4.75872
101.92	1.43997	5.62912	3.55812	6.22168	3.28688	3.14493	-0.500701	-0.0949297	-1.85267	-3.29201	0.688229	3.70304	2.61406	0.165464	0.0774095	-1.46669	-5.06989
103.04	0.0614715	4.82579	3.65898	6.68581	4.06745	3.32972	-1.82244	-0.128277	-1.7358	-3.25131	0.0581213	1.48519	2.43316	0.277053	0.821597	0.413236	0.17292
104.16	-1.86662	2.62404	2.88512	5.09494	3.17018	4.61528	-2.37683	1.12695	-0.987327	-0.172284	1.092	12.6427	1.0407	-3.5817	0.49152	1.94331	0.641106
105.28	1.76633	3.53046	3.59689	7.6877	3.34358	3.45143	-0.0352997	0.611427	-1.15962	-1.79876	2.05164	4.98978	2.0042	-1.02008	-5.45559	2.05833	-3.24793
106.4	-2.82325	3.89677	3.02744	3.89763	2.38002	3.42992	-0.473902	-0.03801	-1.99982	-2.70449	-0.0327454	4.7932	3.36041	2.50741	-0.506443	-0.268044	0.810052
107.52	-0.222189	2.92552	3.7589	8.38662	4.11973	3.37953	-2.48669	0.487974	-2.94466	-3.05119	0.928299	6.33054	3.59891	-0.856828	-0.401572	3.40125	-0.371457
108.64	-0.974032	2.37814	4.62341	9.13846	3.6931	4.22771	0.392257	0.870239	-2.09054	-4.13458	1.8824	-0.286984	1.18971	1.27661	0.449503	3.67496	-7.47045
109.76	0.0437431	3.11326	3.48582	4.79755	3.35189	3.8806	0.152907	0.623093	-2.64079	-3.92119	1.50651	0.828691	2.74395	-1.63155	0.249843	3.87173	-1.13557
110.88	-2.84894	4.24864	3.35287	8.30763	3.93763	4.15236	-2.55358	0.667985	-1.94739	-2.83332	1.42294	2.02315	2.02607	-0.0680486	-1.52793	1.93009	-0.195888
112	-2.74582	3.09184	3.60255	7.56512	2.80896	3.00357	-1.56264	0.010113	-2.62087	-3.57222	0.62282	3.09305	1.45921	-1.15523	-0.524257	2.90952	5.77128
113.12	-1.19618	5.22616	3.43394	8.5414	3.59819	4.35668	-2.23793	-0.511349	-1.39245	-2.93457	1.65537	1.41241	3.82436	1.29811	-3.54033	4.26968	-0.402376
114.24	0.146496	4.19754	3.49472	6.56027	3.27987	2.84282	1.49449	-0.559027	-1.32403	-2.98543	1.5428	6.71693	3.43321	-1.70471	-1.87616	2.49715	1.81268
115.36	-0.1766	4.56824	3.44137	5.51809	4.32316	4.64935	-0.0670074	0.1265	-2.30117	-4.56796	-0.0914211	4.85773	2.26212	-1.48442	-0.847613	2.3653	2.38356
116.48	-1.34416	2.69555	3.60473	8.89991	3.42242	2.48798	0.780126	-0.333519	-2.43129	-2.9659	1.52494	4.91175	2.70369	-0.472875	1.02462	2.12525	4.465
117.6	2.92955	2.99892	3.44685	7.09678	3.16272	4.49488	-0.380821	-6.01355e-05	-1.57015	-3.53836	1.76347	3.61225	2.83306	0.034034	-2.67346	0.726224	3.0494
118.72	0.619745	2.46638	2.64061	5.58524	2.73797	3.80562	-2.50817	0.18003	-2.23028	-3.39504	0.371833	5.49097	1.94778	1.99802	-1.5434	5.6659	-6.48107
119.84	0.926561	3.28297	3.87719	7.11158	3.64982	3.70454	-0.783419	-0.116247	-1.9265	-3.52265	0.817475	2.00889	1.2193	-0.977717	3.04105	4.48488	4.82056
120.96	2.48561	3.88691	3.1767	5.40394	3.31472	3.4824	-1.03279	0.0244443	-1.52283	-3.42532	0.906211	5.02729	2.76834	1.47872	-0.0906525	1.11415	6.38302
122.08	-0.111112	4.09755	2.55873	6.14588	3.76456	3.86683	-0.85993	-0.0532276	-1.66873	-4.06191	1.35411	6.17898	4.04307	-1.79419	-0.600895	0.00486938	3.61696
123.2	-1.9578	3.83114	2.87025	4.70968	2.47989	3.7123	-3.35039	0.178093	-2.3771	-5.01443	1.68582	-0.477556	3.85105	0.432247	-4.60653	-0.181883	-1.68326
124.32	10.8565	3.16216	3.38414	12.8457	6.93401	2.85103	-0.745982	-1.57967	-1.90015	-4.1157	1.11387	3.63176	1.70987	0.46159	-1.46911	1.14421	-2.26077
125.44	-0.153805	3.7169	3.0993	7.94628	3.27122	4.68897	-1.82674	0.244824	-2.22076	-3.95757	1.19997	0.607357	2.17835	0.913118	-3.81999	0.133912	-0.15945
126.56	-0.52032	3.80534	2.22573	5.02164	2.5969	2.38909	-0.645742	0.00696424	-2.2181	-5.16076	1.00642	5.91038	0.572957	-1.54621	0.45421	1.25762	1.48473
127.68	-2.24652	2.05795	2.78317	6.19186	3.68338	3.89934	-1.78889	0.0341322	-1.91362	-3.69356	0.209455	-0.778422	1.73849	-4.43516	-0.365607	-0.998215	0.236963
128.8	3.17015	2.66418	3.60122	5.92315	3.7796	3.62671	-1.21711	0.832857	-1.99902	-3.27467	2.09398	4.70917	2.21393	2.81697	-1.75146	-2.40205	1.21199
129.92	0.776411	3.60237	3.24506	6.4311	3.27924	3.81566	-2.75672	-0.273933	-1.99537	-1.97016	1.38652	8.95654	1.2041	0.933371	2.48476	-0.232376	-2.70797
131.04	-0.771779	3.69499	3.02089	5.90517	3.12245	4.07911	-0.75396	0.161461	-1.43921	-4.4965	1.85489	-0.971245	3.34135	-0.0709423	-1.74877	2.07476	-2.29721
132.16	1.2066	0.559342	3.11842	4.97384	3.02257	3.85117	-1.81876	-0.227426	-2.01248	-2.80288	0.565594	-3.598	1.3133	0.393191	3.0676	0.965473	-1.63689
133.28	-2.23675	2.99334	3.19553	10.5196	3.89158	3.22723	-4.05474	-0.288344	-1.24694	-3.69087	1.11784	4.34828	2.02169	0.981107	-0.137376	1.53855	0.755944
134.4	-2.44841	2.92871	2.9949	7.17839	3.98399	3.95106	-1.30099	0.245068	-1.91561	-2.84634	0.876534	0.653874	0.612697	0.912086	-0.286953	-1.26792	2.05339
135.52	3.05835	2.02	2.71007	5.4415	3.77357	4.59988	-0.707523	-0.451278	-1.78869	-3.39561	0.681279	4.35429	2.10184	-0.780162	-4.23309	4.40112	-5.92455
136.64	-0.0647996	3.57916	2.57678	6.14304	4.46967	4.24945	-1.35275	-0.77973	-1.89516	-2.97615	0.667763	6.69218	1.73508	-1.03579	-1.55146	-0.0263894	-0.776704
137.76	0.185936	1.11409	3.93968	9.01942	4.38295	5.10591	-2.46971	-0.123027	-1.65224	-4.14728	-0.98164	2.75167	3.71672	-0.282757	-4.36015	-2.27621	1.95954
138.88	1.05283	4.04297	3.67991	5.85213	4.68695	4.77346	3.24174	0.548166	-1.427	-1.88348	0.941135	7.21813	2.67226	2.33156	-1.09164	5.45831	2.42883
140	1.15559	3.55466	4.22487	5.48884	3.66647	4.62189	-1.90141	0.771615	-1.47402	-3.73376	0.138074	4.18097	3.58912	0.594672	-2.71581	2.13647	2.52379
141.12	0.653755	3.85813	3.20415	7.44448	4.07622	4.24088	-2.39545	0.676221	-1.42266	-4.22622	0.557919	-0.539083	3.14096	2.03708	-4.20956	-0.02198	4.65824
142.24	1.35893	3.66581	4.46766	8.75218	4.69345	3.95249	-0.796512	1.0796	-0.745985	-2.83918	1.23587	2.6969	2.65305	0.147898	-1.45399	-3.68045	13.3727
143.36	2.19652	3.72935	4.12989	7.11238	3.69628	3.8754	-3.13764	1.30176	-1.68445	-2.21667	1.74436	-1.29162	2.4385	0.816821	1.78931	-1.07596	0.478787
144.48	3.45707	2.83837	3.89565	3.87316	3.73246	3.16435	-3.01715	1.27422	-1.75023	-4.12091	0.684434	4.09093	2.74847	-0.20919	-1.72524	1.28046	2.01585
145.6	2.02683	3.60286	4.04862	5.17734	3.53921	3.22986	0.884459	-0.755305	-1.55808	-1.63965	0.388761	3.36691	-0.36096	0.969741	1.86695	-0.613892	2.96106
146.72	2.19037	2.97362	5.07215	8.09697	4.88248	3.97928	-1.97669	0.0681242	-1.13189	-3.26238	1.28158	1.86709	2.83877	0.726309	1.7725	3.01332	3.71634
147.84	-0.777207	2.68808	4.23155	3.74285	5.27161	4.46213	-1.5923	0.123675	-1.73571	-5.85376	0.207664	0.724402	4.50369	-0.941142	3.41112	-1.83459	0.412535
148.96	3.91042	3.14413	3.27445	8.25881	3.77629	6.00382	-1.44971	-0.179829	-0.981642	-4.32787	1.37181	5.66504	2.204	0.410755	2.14392	-0.865565	1.16671
150.08	-1.24069	4.31875	4.26203	5.25997	5.42943	4.12751	-3.32687	-0.957683	-1.74111	-2.63629	0.74571	5.61026	2.1008	-0.0914006	-4.53224	-2.77315	-3.14634
151.2	0.472488	3.65256	4.26459	6.80725	4.11631	5.07727	-4.54285	0.39274	-0.965038	-4.86998	0.362195	7.20612	2.32774	-0.670844	-0.0940143	-1.43864	3.96037
152.32	0.693918	4.55599	4.17332	7.15198	4.12382	3.00527	-1.01315	1.24516	-1.17614	-2.89542	1.24696	6.72894	1.71491	0.690764	-1.64356	1.82869	2.47962
153.44	0.60817	3.38465	4.45041	6.5712	4.81259	3.63865	0.870548	1.64821	-1.11606	-2.60349	2.75432	-0.137677	2.9892	0.532471	-0.909797	0.451708	7.07867
154.56	-1.86988	3.4471	4.5341	7.88152	4.05837	4.88249	-2.10434	0.855828	-0.991474	-3.68794	1.76095	6.01992	2.61539	0.303919	-4.20553	6.24619	0.800113
155.68	-5.16815	3.37877	3.63352	5.83199	3.72848	3.9256	-4.34441	0.849328	-1.05195	-3.36517	1.38703	0.0393897	3.45412	0.7447	-0.00594892	2.13367	-5.15381
156.8	-1.34597	1.234	3.49571	3.70153	3.69914	3.13048	-0.54632	-0.253707	-1.45444	-2.50843	0.0999116	2.62863	2.02028	2.34643	-1.44592	2.33324	5.72822
157.92	-3.77192	3.44232	3.49261	8.18802	3.4423	3.91946	0.000706998	0.660639	-1.13164	-2.33004	2.22084	4.21098	2.94968	2.21252	-4.79879	1.36422	1.28155
159.04	-1.99615	4.17344	3.79074	6.71096	3.99137	3.6773	-1.13467	0.528547	-1.13859	-1.0733	1.5857	2.71266	3.95944	-1.90929	-2.78001	-0.531338	0.249109
160.16	0.809335	5.1922	2.49617	4.94197	4.13094	3.6704	-2.02395	0.752319	-1.16545	-2.0705	-0.145319	-0.346256	2.41129	-2.98097	-3.52554	2.05271	1.98162
161.28	-0.640803	4.59792	2.92186	7.33841	3.97363	3.64129	-0.834563	0.873429	-1.06863	-4.09471	-0.482823	4.67691	2.80689	0.65832	-3.92284	-2.04378	2.51164
162.4	0.656291	1.5049	3.39883	4.78867	4.64067	3.82846	0.993087	-0.619543	-1.44838	-4.37491	0.0286582	5.16384	4.87742	3.16766	-3.39445	3.95268	4.15692
