# Supplementary material for: Optical tools for visualizing and controlling human GLP-1 receptor activation with high spatiotemporal resolution
Source: eLife. 2023 Jun 2;12:RP86628. doi: 10.7554/eLife.86628 (PMC10262203; doi:10.7554/eLife.86628)
Supplement: Figure 3—source data 1. [file elife-86628-fig3-data1.xlsx]

## Sheet: Panel b (Timecourse uncaging)
Time (sec)	10 sec												20 sec													50 sec													100 sec
-22.4	0.260807	-1.98726	1.11152	0.78082	0.53492	-1.21269	1.40811	4.82922	-0.0867786	1.07433	0.193696		-0.905557	3.15918	0.120341	1.61432	0.152779	0.552084	-0.988034	-0.202	-2.77279	-1.77771	1.47926	-0.431872		1.17435	-4.34078	0.697532	-0.856256	-1.45669	2.59383	0.522222	2.32722	-1.55619	1.82649	1.34253	-0.924192		-1.64336	-4.02962	-0.771068	-1.39645	2.63094	-1.16489	-0.875514	0.81813	0.307951	3.81728	1.05068
-21.28	1.45812	1.94529	-0.812256	-1.2335	-0.492333	2.87734	2.37353	0.804735	-1.78984	1.19898	0.657869		1.51299	3.9366	1.65182	-0.263581	-1.7299	-0.493941	0.818467	1.51624	0.576959	3.12791	0.876732	2.28763		-0.462347	-0.667144	0.265473	1.07721	-1.85092	2.04804	1.40953	1.55581	-0.11324	0.173639	-0.870239	2.08656		1.39277	1.43711	0.952699	2.28358	2.31117	0.398743	0.887761	0.377719	1.00203	2.14411	-0.734444
-20.16	1.27464	0.806775	2.06841	0.48726	-0.355655	-2.30649	1.66583	-0.0651329	0.321371	3.6677	1.67716		-0.114681	0.212049	0.481163	1.18765	1.98424	2.46341	0.564202	0.700859	3.60181	0.641454	0.818124	0.500789		1.55024	5.06541	1.67029	3.3164	1.10212	0.214856	0.897798	0.487833	-1.6325	0.200025	1.36272	-0.400753		-0.618012	1.21728	2.70272	-2.34223	0.683577	4.23383	3.90614	0.444582	0.137879	1.07821	-0.133628
-19.04	-0.063354	0.659861	0.0591143	2.96119	1.97221	1.06825	0.679492	-1.00389	3.65703	0.424853	0.985616		0.713274	2.66022	-0.763146	-0.476394	-0.643623	1.1833	-0.0511091	-1.01469	4.30127	-0.377706	1.33845	1.36012		1.36126	1.24737	-2.35474	0.215982	1.02707	-5.29037	1.38238	0.443181	3.39149	0.207873	2.25995	-0.130157		-0.237464	0.89195	1.59698	2.27194	-0.484034	1.42346	-0.78735	0.738878	2.28565	0.904383	0.0543833
-17.92	1.09017	1.96807	3.89051	2.22647	1.73986	1.47538	0.35493	0.00983217	3.57874	1.71259	2.09211		-0.0510692	-0.479271	0.853689	-0.0366749	-0.8542	3.33104	1.21607	2.41563	-0.712717	-1.8372	1.50999	-2.34992		1.57587	4.60769	1.79231	0.714829	-0.375629	-1.88318	1.35117	-2.42969	-0.719088	1.3879	-0.202972	3.32035		4.02884	-0.594148	1.07106	1.70394	1.16129	-0.511125	-2.97501	2.08206	2.70243	-2.92542	2.39799
-16.8	1.9742	1.14933	2.65001	0.247411	-0.400256	1.00681	0.970027	-1.02246	0.296819	1.22065	0.276685		0.798313	-0.463731	1.03591	2.9434	1.63403	3.62948	-0.952919	0.3028	0.856459	3.81305	3.11244	-0.492778		0.586078	0.260132	-1.1165	-1.35269	0.588579	0.681192	0.617363	-1.76082	2.16217	1.44115	1.04476	1.36223		-0.963846	1.29732	0.568617	3.60115	1.66299	1.14924	-1.08744	2.78966	1.4783	1.29192	1.66902
-15.68	0.871167	2.3544	4.14237	1.30562	-1.65843	4.799	-0.602039	0.511965	0.944093	1.02956	-0.0723824		1.96541	-0.54899	0.424255	-3.02545	-0.157586	0.305666	-0.610958	-0.0914071	-1.03478	1.547	0.943919	0.683199		-0.113972	0.961078	0.203354	1.54538	1.60437	2.03858	0.515667	-1.39867	0.487274	0.518273	0.894374	2.03362		4.52654	3.18546	0.394075	0.224743	2.03104	1.65653	3.82947	0.288654	3.81732	-0.967441	1.90899
-14.56	0.575219	0.483731	0.278942	3.10346	3.72243	2.48476	1.21707	1.76949	4.52635	3.0961	2.32488		0.89696	0.972666	3.61736	1.90387	1.68753	4.33838	0.807662	1.13745	-1.9045	0.648769	1.18336	0.193234		1.27888	-3.36874	2.22019	1.31236	0.783231	-0.148375	-0.599748	3.30404	0.400062	0.587647	0.146936	0.617187		-2.30726	-0.426322	1.81573	2.08837	0.577783	4.02655	2.99712	-0.445538	1.15933	2.05156	1.06616
-13.44	0.971152	3.1665	0.0832128	-0.028106	2.94767	0.702405	1.51768	4.50268	0.480788	1.13777	1.33249		0.313583	0.784508	-0.28084	-0.401746	2.25628	-3.31958	-0.758799	1.61181	2.20643	-0.0505023	-3.1787	3.40089		0.392032	2.8815	2.49151	0.62125	-0.332599	4.48566	-1.35078	-0.783694	-0.104657	1.80971	0.978459	0.316671		2.40207	3.53255	-1.4918	-0.108142	4.30412	-1.65714	4.31191	0.319375	2.36867	1.53083	0.826666
-12.32	1.80235	-0.0792537	0.201061	-1.91041	2.03336	-0.105281	0.448302	-0.0712099	-0.783871	-0.39905	0.990739		1.92425	-2.39951	1.97207	0.540166	3.6958	0.735481	2.8506	-0.827412	1.22605	1.04132	0.3078	-1.7333		0.345539	1.65358	2.11712	0.441194	1.98208	2.78775	0.43642	0.0440763	0.0333511	1.22151	0.565258	1.86397		1.29644	-0.0106263	1.33724	3.0275	2.70574	1.67342	-1.46692	0.446904	2.71923	0.506691	1.62133
-11.2	2.62747	1.09976	-0.348506	4.60077	-0.20099	0.367979	0.990787	-0.884685	-0.0540415	-1.11586	0.17686		2.2889	-0.00383159	-0.00437117	2.69944	-0.624653	1.35603	0.898239	2.33279	0.732316	-1.38907	2.96591	2.27703		1.02497	1.67469	2.78874	1.96812	1.04801	0.125941	1.25591	2.12274	0.24999	1.42446	-1.34432	0.317656		0.347895	-1.67156	-0.281524	3.0694	1.83539	0.584833	0.466655	-0.207001	1.30621	1.69488	1.66123
-10.08	1.32927	2.59307	-2.09213	0.187963	-1.32536	-1.9078	-0.221059	-0.0512878	-0.269681	-0.123638	1.88065		3.80908	1.31497	-1.45472	0.403916	0.830801	2.19198	0.931733	0.383721	0.481191	1.45532	2.34838	1.64404		1.06633	-1.21861	2.92552	1.96513	2.81654	1.89102	1.34136	0.437637	0.822903	1.11437	1.2259	0.909977		5.76365	-1.1821	-0.0696789	2.10234	2.04057	3.96698	-0.774207	0.413344	-1.18003	0.467937	1.24463
-8.96	0.258499	1.13404	-1.32626	-1.47417	-0.0758211	-0.132487	1.00345	0.430246	3.314	0.525064	2.09723		-0.0541316	1.56907	0.233956	1.72813	3.90751	1.42172	1.07741	2.09079	3.55073	2.28089	1.7673	1.46405		-0.607957	2.94146	0.442365	-1.43505	0.640738	0.173235	1.82386	2.89724	-0.794239	0.169757	1.98268	1.65551		1.90437	2.87747	1.19724	0.770462	0.87192	1.98326	0.497869	2.4982	1.09681	2.83452	2.4666
-7.84	0.990793	1.78899	1.48152	0.50407	-0.102438	0.70006	0.870367	-0.510534	-2.74705	1.43396	0.952951		-0.76643	1.70389	0.452104	2.08624	-0.935775	0.827179	0.450036	0.230354	-0.027443	1.606	2.87157	0.198689		0.772347	3.17201	0.805338	2.50175	1.88704	0.816458	1.68758	4.80653	0.121725	0.501413	1.25061	2.31737		1.08252	-0.974433	1.87514	2.39365	-1.07439	0.345005	1.76173	0.78483	3.25365	1.38786	3.71835
-6.72	0.634747	-1.7933	-0.573329	-0.545524	3.25988	2.5537	1.41268	3.25765	-1.10626	-0.303061	0.736007		-0.326941	1.24357	1.16023	0.589583	1.17911	-1.01512	-0.22236	1.3282	-2.63446	-0.792685	-0.831493	1.3377		0.836576	3.9819	-0.237063	2.41541	2.96179	3.29665	0.632215	1.44464	3.30614	1.33129	0.480571	0.256994		3.18183	2.7528	3.38246	-1.0047	0.331328	0.917397	-1.40723	1.5167	-0.43049	1.41231	1.16833
-5.6	-0.284328	1.00695	1.4442	-0.262216	0.291055	-1.08089	0.205745	-0.131655	2.07602	1.081	0.843153		1.34121	0.487568	-1.21801	0.675197	2.49873	-0.338222	3.8266	1.04574	0.581215	0.777505	0.360692	2.42277		1.8071	-0.723726	1.9185	-0.119135	0.388202	0.138237	0.468038	-0.317149	2.02231	1.17805	0.722583	1.43045		2.10614	1.62596	2.72528	1.00525	-0.557344	1.24965	1.7349	2.77159	0.218882	2.87779	2.16045
-4.48	0.895894	1.70588	0.868771	0.889879	1.21904	1.57951	2.07291	-1.38547	2.25003	1.45307	0.347138		1.69022	4.54518	-0.535715	2.09058	-0.233471	2.28401	1.51841	1.018	2.20643	1.07106	-0.271139	0.28747		1.29992	-0.559046	0.219509	0.0599247	0.171021	-0.738626	0.838914	-1.58467	0.970421	-0.539216	-0.627926	0.489779		-0.597617	4.39456	3.90562	2.85889	0.392419	-0.945331	2.43035	4.69872	-0.611992	1.71406	0.518959
-3.36	0.456866	-0.510191	0.902273	2.04771	0.970137	-0.433611	0.14183	0.391412	3.62714	1.59249	0.265613		1.64498	-2.82035	3.8787	1.6453	0.11939	0.811173	0.929391	-0.655935	-0.346671	0.101154	-4.15646	2.13219		1.56309	-0.837735	-0.478583	-0.0917296	2.12479	-3.77407	1.47357	2.73464	1.49462	0.677762	1.31631	-1.1001		4.00497	1.49133	2.09481	0.864575	0.92452	4.11591	3.72433	1.38607	2.12633	2.93649	0.761562
-2.24	0.951092	0.762375	3.6263	1.39582	3.27067	4.09544	1.75318	3.17796	-1.34824	0.0027914	0.501222		-1.34572	1.94622	2.51613	-0.0700836	2.41981	-1.44927	3.20048	3.68919	1.79711	1.49579	2.32908	1.32346		0.530157	-1.89	1.11371	0.338103	0.0564165	3.44799	1.04596	0.617173	2.84387	1.07224	1.78647	1.20671		-2.6557	5.01091	3.95075	0.707277	0.95	0.422389	2.91607	1.57323	3.16828	0.91868	1.06246
-1.12	0.768312	0.588038	1.18734	3.55856	1.49312	2.31168	0.580263	4.2842	1.95646	0.133776	0.583388		1.95486	-0.53051	3.14858	1.45563	0.102695	-1.5253	1.78438	0.277367	4.60489	3.90716	1.51428	0.784102		0.986251	2.12566	-0.517861	2.32851	1.80054	4.06189	1.21727	2.01866	3.5803	0.66237	2.65205	-0.663129		2.31485	4.50374	-1.62673	1.2081	2.03059	1.46092	5.239	2.03352	-1.59681	-0.347011	0.839901
0	1.60054	3.8784	-1.88612	11.0398	3.3685	3.34028	1.26685	-1.92913	7.22469	-1.29795	6.75084		0.503392	1.96008	1.5273	-1.35062	8.4116	5.64883	12.8686	9.19189	6.3053	5.50904	6.19725	-0.115531		7.1665	25.4376	-1.18392	-0.0947127	13.577	13.2978	1.07009	5.646	25.4783	4.17951	9.96547	-0.00291495		28.8629	17.4408	10.7675	14.4055	26.9608	18.9548	14.0127	16.2545	8.30982	30.4559	17.6896
1.12	2.44808	3.90276	0.848491	12.4887	1.99452	-1.31306	2.25044	1.41323	7.31045	0.210211	6.90227		2.74982	4.06722	2.17085	0.52816	5.49235	11.6149	11.9364	6.84207	11.8946	13.7184	7.14214	1.03439		7.12566	20.5656	0.834589	0.15833	15.3274	19.7187	3.93791	10.0528	26.0929	8.41489	11.4172	0.974749		29.7755	17.4814	14.9293	17.7473	27.7325	21.9159	14.4628	14.2923	9.56856	28.4238	21.1299
2.24	5.36133	4.66729	1.54148	13.4756	11.5383	1.90924	4.83779	0.300913	6.83504	2.40573	8.17941		3.16414	12.0543	3.14091	3.08	14.0278	10.4228	17.1897	10.1668	15.2564	13.0323	17.1378	3.98176		8.54333	26.8395	-2.37842	2.89466	15.9832	24.5078	4.22432	7.96764	27.2998	9.48825	16.4353	3.95443		30.8234	18.8207	16.5596	17.3485	30.7616	21.8137	15.8269	16.0423	15.9309	29.7162	22.6733
3.36	4.82095	7.14514	4.00395	13.4838	4.09506	4.97629	5.16071	4.398	8.22816	1.90912	9.70268		3.68425	10.3563	3.82179	1.06828	13.6502	11.2564	20.3738	11.8558	17.1037	13.283	8.30859	4.13477		8.10515	27.4805	3.48461	1.1387	18.149	24.3801	5.56616	8.17828	29.1962	9.61493	11.47	3.6281		33.0906	16.2111	16.8599	19.2587	28.3427	26.6403	15.4939	15.7214	9.01297	34.3511	24.1744
4.48	5.0585	8.67209	4.95908	16.2656	4.6648	4.53774	4.73434	0.827697	9.83336	1.74203	9.99309		2.06065	9.44573	1.67805	1.28162	11.5578	7.17369	17.9813	11.5255	18.6388	15.3788	11.7458	4.30597		11.7531	21.9776	6.99039	2.11963	15.8991	26.7071	6.57715	10.8611	31.0787	8.18991	12.4157	2.58024		26.8895	24.4781	18.9926	20.6741	34.2682	32.4146	14.4365	16.1856	17.2407	39.5396	23.6676
5.6	5.75411	6.77326	6.98689	13.3493	5.65609	-0.0443073	5.79036	4.58069	12.3239	5.56481	10.0374		10.8671	10.3344	4.03186	0.847117	11.7179	13.5889	17.1106	9.99533	11.7981	19.5798	17.6574	8.92322		12.0214	32.4319	5.62178	5.30042	16.9378	36.1294	5.71171	6.42389	32.8213	10.1896	16.3208	6.66236		31.1701	23.1786	22.7975	17.1217	33.4926	27.4442	20.7876	16.0346	14.9817	34.6514	25.4612
6.72	7.88458	8.78726	7.71485	19.7248	3.72315	2.45098	6.15429	3.08172	11.6186	4.62892	9.99703		3.10495	9.99551	3.59718	3.14752	7.97527	12.1501	17.9273	14.1378	14.3874	14.4577	15.4303	8.53052		11.0056	24.8422	2.85727	3.01238	19.485	32.2208	6.58376	10.1088	32.2681	11.044	19.0122	6.44256		33.7584	23.6198	20.6606	19.415	32.0753	29.8502	20.8593	20.6997	18.2373	33.9501	26.7202
7.84	7.97246	9.86049	9.38235	11.0304	5.74385	4.84215	6.07883	4.19336	9.16331	3.76013	13.3478		6.81679	7.77413	4.37311	3.14682	11.914	15.941	19.4916	10.8762	13.9086	13.7433	12.537	6.14918		10.8424	31.5722	5.06297	4.73441	18.2387	29.5079	8.50121	10.2394	28.2862	11.3519	17.1089	5.12706		31.1002	27.8516	14.8695	17.6695	38.4034	33.876	15.4956	21.2963	14.6946	37.2742	26.7428
8.96	7.9809	9.39739	7.58024	14.1705	4.93241	2.731	5.40189	7.30206	14.8294	5.99664	10.3046		6.14089	10.1559	6.10336	3.55609	13.1923	19.2658	19.1914	13.7964	14.1831	17.0324	12.289	7.74028		12.001	36.608	6.62519	5.89227	18.5684	30.923	8.08804	13.0223	33.9757	10.6938	15.3235	7.39047		36.7516	23.9986	24.0732	26.6111	35.7296	28.5964	22.3389	20.4957	19.9397	39.5057	28.3275
10.08	7.11895	9.6427	3.76002	18.6526	8.80907	3.97724	5.34909	1.8377	14.4643	6.9632	13.9234		6.89741	6.83249	6.36247	4.78285	13.0265	14.952	24.1809	14.2676	11.7215	18.2042	10.9317	3.63481		11.4193	32.5949	5.27218	4.42343	19.7016	31.2901	7.46794	8.66176	29.7338	10.7518	20.2816	6.56208		37.5019	25.8871	19.9989	21.2108	33.4713	34.4852	22.1089	18.5072	16.1924	40.1987	28.1265
11.2	8.34377	8.7881	7.4624	18.9938	6.90131	6.29336	6.25895	1.27985	13.8174	5.24685	13.0726		5.45275	3.47628	4.7418	3.467	14.3662	9.24807	18.7068	15.0063	16.998	18.2159	11.5471	7.79876		11.1104	30.3856	5.66663	4.84318	22.1935	32.4422	11.3227	10.098	30.8697	17.5574	14.6779	7.54369		37.4576	24.027	20.9236	21.8061	35.4677	30.8009	19.7296	22.221	20.6469	42.5356	38.7535
12.32	7.07341	9.87916	8.20387	18.1955	10.5564	6.06822	7.00092	4.17783	14.1992	6.22173	12.4185		9.52788	6.66449	3.57216	4.02417	11.8844	13.2338	21.8833	13.1262	15.9615	16.7998	16.2501	8.55901		13.1941	54.7034	6.75584	5.16254	19.5784	31.869	9.24058	12.1111	32.4583	11.921	19.2301	6.15437		34.2114	25.6463	18.8448	24.5047	38.5952	32.905	23.2299	21.0866	18.5146	42.4634	28.9259
13.44	7.98245	9.09997	7.95083	14.7704	5.08851	6.39514	3.64438	3.08172	15.0521	6.91942	13.1876		3.89413	7.78631	5.93243	5.49124	13.6256	11.6662	21.8091	14.6749	17.9705	14.0022	16.9262	9.1223		13.5747	35.6866	4.88553	7.43339	22.0784	26.2521	9.04891	11.7206	30.3981	11.4352	16.0188	7.41727		39.3612	28.1681	19.3371	23.4057	38.5467	34.9523	24.4751	21.9055	16.5839	44.7822	31.032
14.56	7.20146	7.86379	8.23414	15.4182	6.58911	8.73377	6.30494	1.10527	15.1799	5.03698	13.2167		9.66633	7.28777	8.7742	3.73567	15.1645	11.6586	17.4249	13.2461	19.4993	18.3466	15.178	7.85663		12.9751	34.6099	5.92459	6.05898	21.1099	23.4626	8.23481	9.43041	32.1683	12.1571	15.3262	8.48288		47.3189	31.9163	20.2526	21.9837	36.3875	32.5598	24.7714	21.58	17.6363	39.2634	26.7747
15.68	8.40132	9.84815	6.52755	15.164	5.74313	2.89939	5.64591	5.11793	18.2177	7.60468	12.6849		7.34847	6.73463	6.86354	5.4159	11.851	12.5705	19.2685	14.5189	13.1743	18.4534	18.5815	9.14078		12.4006	29.732	6.12181	7.22182	20.0176	32.3362	8.15412	5.73747	32.6248	12.3878	17.1321	7.03669		34.4232	26.9184	24.8607	19.5823	38.9847	34.8967	17.8365	19.5287	19.8311	42.0138	30.8493
16.8	8.3117	7.02838	4.58466	16.3636	7.35163	5.40687	5.14728	2.9821	15.0575	7.30805	11.291		6.79128	8.05259	8.44446	6.11019	11.5039	15.5446	21.5766	14.6711	20.7287	21.4119	14.867	6.31068		12.0802	31.3517	7.14639	6.81754	20.8478	29.3027	8.20296	11.2584	30.5357	13.1012	15.8967	7.83943		40.256	27.6797	22.3711	19.296	42.1317	31.8591	17.681	20.5724	19.2382	42.9916	30.0368
17.92	9.76338	12.0023	6.74825	17.3111	6.94591	2.76243	4.40909	2.07307	11.5407	4.34228	12.045		9.26528	7.35245	8.1472	5.62193	15.4043	16.0694	21.299	16.0595	21.0521	17.9691	12.8207	10.3065		14.1285	35.4231	11.3965	4.87385	25.477	52.419	12.0857	14.2135	33.1451	11.3509	13.3949	6.45719		37.8477	28.5362	16.7894	22.142	38.0143	32.9603	20.5735	25.0899	18.7633	46.2251	30.5414
19.04	9.25743	10.5288	13.2584	16.1316	7.9372	4.54009	5.36193	6.01212	18.37	7.72167	10.837		10.0861	8.94593	8.14639	3.79344	13.5717	11.3791	20.3963	17.0009	20.0391	16.3999	15.4631	11.0007		13.4243	31.1811	6.94108	5.02111	20.8375	41.4974	8.87823	10.8457	34.672	11.5362	19.2584	9.98743		39.1221	35.2674	20.6427	23.2514	40.3393	30.9446	22.3658	24.5903	16.1208	47.4445	33.4826
20.16	9.40724	7.6788	6.24629	17.3849	8.7695	6.9744	4.85278	2.56101	12.9548	6.93631	14.4699		10.6803	7.42637	9.1546	2.51047	10.8004	11.3308	17.6815	17.1854	19.3893	15.2213	14.6998	10.2089		13.3356	33.3836	7.23637	4.98944	20.41	34.7549	9.99318	12.9124	28.2104	13.0876	17.9082	7.99035		33.2538	30.4848	28.5532	23.3255	38.4955	34.5392	20.1825	24.4672	18.4416	46.4335	31.2835
21.28	7.75936	9.5984	7.30399	21.4878	6.31647	4.8004	6.52846	5.84395	13.9579	8.0884	11.4045		5.85992	8.83799	5.96028	4.79973	14.5077	12.6462	18.9924	21.5125	22.7249	14.9087	12.2532	10.1286		11.9258	31.4083	7.27703	8.3899	21.9517	28.8278	9.13506	8.60787	34.6029	10.5397	18.4537	7.64758		38.2777	27.0962	18.661	18.2704	43.2941	35.93	22.9643	25.2424	16.026	44.3472	28.0439
22.4	8.15002	9.09427	6.89667	11.433	9.47448	5.11748	5.062	3.12224	15.7542	6.0322	12.9022		5.45445	11.5386	10.2266	4.98958	15.6946	13.5632	20.0356	15.6456	18.3018	17.1719	20.2762	8.85262		12.5486	35.7609	8.55984	5.64775	21.0569	34.0919	8.65714	16.7781	29.6197	11.8854	18.2581	7.27506		32.2953	30.9109	28.5403	22.968	39.0216	32.0347	23.2775	21.7612	20.8543	45.1396	33.0125
23.52	8.27171	9.23149	6.55605	13.3915	9.3004	4.09403	5.54152	5.29421	10.7255	7.47303	11.728		6.89503	7.05887	8.74797	7.08517	14.8018	7.96396	18.2141	15.4938	21.7715	13.6204	15.8777	11.8718		14.9233	30.427	7.80743	8.16924	24.052	40.402	9.79205	14.5569	33.58	10.4139	19.5661	6.3819		38.1688	30.6106	23.0103	21.0735	40.6435	36.8485	23.4243	28.6519	16.9248	39.0106	31.936
24.64	8.23182	9.70197	7.37394	16.0783	6.97756	6.09542	4.50995	3.97489	15.3702	9.42835	14.4989		9.38365	13.0405	8.27312	6.6759	20.2484	10.9013	22.1738	17.1169	18.5175	18.1257	13.0909	7.25152		11.4633	29.8232	2.98653	7.85528	21.1312	34.8864	9.63652	11.7795	27.367	11.4589	20.1023	8.08981		38.1089	29.5583	22.1606	18.5707	40.136	35.5597	22.4107	24.1393	23.161	41.9494	30.1063
25.76	7.42856	8.3636	10.0545	17.346	7.81059	7.75113	6.68032	4.22038	12.8986	7.30938	12.5903		8.4363	10.2614	8.41782	5.62419	11.1161	10.6155	17.8617	19.3572	19.2304	17.8077	9.74665	7.91905		12.8852	31.0967	10.2229	7.83525	21.2589	35.1286	8.92975	10.4285	30.1432	11.0409	16.7153	6.27175		34.8897	30.0887	19.8515	20.2857	40.2336	31.7657	21.3992	22.3867	17.524	41.1232	32.6125
26.88	8.41921	10.872	11.5445	19.8064	7.64657	2.23476	7.01651	4.73332	16.2609	7.70356	11.5259		11.2178	7.40537	9.46315	4.6922	12.1288	13.6136	18.2478	17.2837	20.1753	19.1473	16.2944	9.37683		14.2889	31.8247	10.163	6.00829	23.8826	35.611	9.42814	9.70972	28.395	10.131	23.6047	6.33275		41.7148	30.1134	24.2777	24.401	42.374	31.1454	19.648	22.9105	18.483	43.0766	31.8619
28	10.0189	9.30247	12.8943	15.979	13.3461	10.5246	7.92791	3.22051	12.4018	8.78321	13.779		9.87042	11.1597	9.40645	4.91284	10.3482	11.1754	19.0526	17.3515	15.6331	15.35	11.2748	9.45864		14.2211	35.4552	4.8794	6.87377	20.5174	36.4907	9.04612	17.9037	30.0943	12.3322	17.4025	8.77583		40.3623	30.9404	23.5325	22.1822	39.2116	35.9496	24.8716	21.9824	16.1611	44.3683	31.8014
29.12	9.1979	8.49849	8.77812	17.2385	10.5305	10.3294	5.58553	7.44017	13.7124	7.31849	10.8526		11.0668	6.80897	10.5795	7.13719	14.1947	6.87893	20.0446	16.3092	29.8436	20.501	11.5621	8.70687		12.8573	34.0947	9.18941	8.17449	20.0538	38.6426	10.2426	15.4441	30.1956	11.8457	17.6439	7.83467		37.4984	32.9248	21.1382	20.7053	40.2181	35.3005	23.3301	23.4857	20.2963	46.6517	30.5031
30.24	9.09721	9.51203	10.2846	19.7121	8.94719	7.3426	6.21639	2.78591	15.3688	6.21695	12.4709		9.83981	10.0971	9.08517	7.10448	17.4964	9.74024	18.275	19.405	24.9205	15.0336	15.2459	8.74354		14.2181	36.5979	8.28657	5.14635	21.5679	38.3551	8.44325	18.0404	34.5129	13.0427	14.5387	6.28277		36.3949	31.6504	24.8593	19.9448	40.8949	34.4941	26.6047	25.799	19.0675	47.1111	32.5777
31.36	7.93662	9.44189	10.0389	19.571	12.8548	8.30694	6.24249	6.64257	14.1579	8.56712	11.7435		9.23092	8.92157	10.5333	5.73172	12.6729	14.1544	19.377	17.8324	19.5028	18.7303	15.0093	12.9381		20.6421	24.3237	9.72064	10.0646	22.1099	32.6522	9.11986	14.4349	27.0483	10.7671	21.1333	4.58801		38.893	33.5847	17.5	21.6983	36.4337	31.5717	25.8441	22.3077	21.0092	49.3581	31.345
32.48	10.0735	8.61862	8.41576	12.9057	5.97405	4.35622	6.77016	1.90524	13.1096	8.26249	14.151		8.84586	7.81739	11.7843	6.00892	13.9397	10.8239	19.9682	17.2752	22.1822	21.9463	11.5006	8.72051		14.4655	31.4049	7.68904	8.76393	22.3433	30.4018	8.40032	13.9853	27.7312	12.4514	21.0333	10.0829		41.7235	29.0629	17.9937	19.8673	38.0881	36.171	30.0869	26.187	20.7783	47.4422	31.4477
33.6	8.0643	8.08917	5.82428	16.7187	13.9792	4.40172	4.07505	5.95573	13.7497	7.02419	12.1667		9.67789	9.98249	10.1781	8.66204	13.7967	11.0494	17.2655	17.4694	17.6088	17.6849	10.8166	7.12547		15.6802	34.2822	11.1533	8.09852	22.5271	34.8117	9.51069	12.4342	27.4967	11.1968	15.4947	8.40874		37.2003	33.3438	23.1286	25.0874	52.3636	43.3198	23.9286	35.1563	31.8193	60.1812	33.1608
34.72	8.84553	10.837	10.3822	15.79	4.40727	5.94439	5.04426	8.56836	14.8941	8.22238	15.1255		11.3307	12.3412	7.28531	6.18015	17.5856	10.1607	22.45	15.8703	22.1297	14.8722	17.4058	8.31357		13.5229	29.6137	8.67628	7.21741	21.1793	24.925	10.0644	11.6658	24.7692	12.0106	18.8735	7.97325		39.3938	37.3041	25.9089	20.296	39.6617	34.7557	18.1251	23.6512	19.6701	42.9002	33.2867
35.84	9.76828	9.95066	7.44535	14.3321	9.46801	9.38949	5.96755	7.73328	9.912	9.65788	13.5783		9.71837	11.3181	10.3549	5.20883	18.2655	11.2364	22.1898	17.1515	15.0592	16.3702	17.3844	7.41091		13.3882	31.8568	8.71751	8.9082	21.7516	36.6827	9.09433	13.5188	31.2273	12.2494	18.822	8.68476		33.505	34.4216	23.4611	21.418	40.15	32.0584	28.1742	24.2635	18.6184	49.7509	29.6807
36.96	8.75261	6.86934	9.96631	20.8412	11.5355	7.65217	5.28233	2.78253	11.5375	9.76565	12.4615		8.1788	10.4008	9.32391	6.44829	11.4242	12.8456	19.6544	12.8642	17.6613	16.7457	13.0395	11.6727		14.1608	29.933	10.6892	6.87548	21.0804	28.7399	8.44186	13.0316	29.5886	12.0313	16.5351	6.88281		35.1301	34.0616	17.6824	24.5054	43.6576	36.1115	23.7402	28.2386	22.0485	50.0383	34.3144
38.08	9.99688	8.35326	10.1673	17.9782	2.66784	4.63858	6.04429	4.74446	14.8596	10.5906	15.3838		7.44065	4.78164	9.70208	9.73393	17.0893	12.6086	20.9498	16.8174	20.2931	18.1525	19.2777	9.79983		13.6962	38.0605	9.23342	8.79148	21.6443	31.8046	7.63409	16.8505	26.8658	12.3086	16.7852	6.50257		37.8008	31.1506	21.9957	24.9547	38.8456	36.1898	27.4612	24.8423	18.8994	48.0487	34.0146
39.2	8.79184	8.83989	8.65792	15.41	6.98116	7.94578	5.67856	5.56165	13.9045	7.87998	13.699		7.56447	10.3273	9.42219	6.74307	14.7468	14.1391	16.034	20.7341	22.09	14.6361	7.82257	9.58378		12.1611	30.8704	4.94626	7.93891	21.8818	31.6949	9.46463	16.1591	25.1696	11.6498	10.9368	10.5837		38.3636	36.0305	19.9537	23.5583	42.4617	36.0276	27.9332	26.6643	20.6744	50.1915	34.4465
40.32	10.3945	11.4216	10.3284	13.4305	11.1182	3.63437	4.82082	0.294498	8.42174	6.57358	14.5838		5.9902	11.2988	8.72193	5.63637	18.0599	12.2238	20.3118	16.4556	22.1091	19.2029	14.7355	7.76421		13.0941	31.9395	6.83746	9.38163	23.0951	33.5924	8.60714	12.3544	29.2101	11.9678	16.6074	7.30334		35.5996	31.7242	20.3931	19.433	41.3875	36.3977	27.0658	25.0318	20.9749	45.0549	31.3181
41.44	8.70697	9.92525	10.5585	13.3993	13.1461	1.95943	3.65075	3.60918	11.7777	9.67288	11.3531		9.23058	5.41794	9.4569	6.32596	17.4646	14.5546	19.5058	16.2941	19.8433	20.0514	18.2942	9.50197		12.8178	32.9183	9.4234	10.3813	24.5459	35.8106	9.66442	14.5236	28.8088	11.103	18.6876	6.52542		39.0388	35.8483	19.1718	27.4359	38.2974	36.5383	25.7554	25.815	19.8768	39.2912	32.0289
42.56	8.73843	11.1423	10.7839	18.2332	6.53587	3.54807	5.37347	4.42231	12.1794	8.12751	12.8711		7.39711	5.86272	10.1878	7.68706	13.862	17.2735	18.125	21.8053	20.7244	16.7154	17.9411	8.82263		13.4835	31.7191	11.6188	9.15429	21.9947	35.0652	11.3525	16.8372	25.2818	11.8858	21.731	9.01832		33.2134	34.447	22.6607	21.9145	37.0927	34.5988	20.4042	26.7578	21.4132	49.1967	32.7933
43.68	8.54044	7.22202	12.2704	18.1524	6.39056	11.7769	4.6277	2.793	13.1797	6.28695	12.8157		9.92009	4.23396	8.5952	5.6964	14.3108	13.3138	19.6929	23.9513	17.9606	16.95	17.1471	7.95329		15.0104	31.5358	7.87791	8.35952	24.4721	34.2025	10.2004	12.4665	30.3081	12.0016	16.074	7.86623		40.6777	37.0209	23.1121	28.8702	40.219	34.3977	38.9175	25.9552	17.3294	45.2841	35.5831
44.8	9.46658	10.4724	7.96553	16.6293	6.87038	7.72111	3.77789	3.48525	14.0725	8.93486	12.9164		8.74857	14.6756	8.09029	6.98059	12.4361	12.3715	22.6202	20.773	19.1567	18.2022	18.5036	8.85171		13.2762	31.676	7.21129	9.79499	23.8226	29.8097	10.467	12.7113	30.6391	12.0929	15.4715	8.81496		35.971	30.6977	20.4023	22.2274	41.8676	36.0854	22.8657	25.2788	20.9437	49.0326	32.3549
45.92	9.49178	8.98701	8.6447	17.1369	9.28529	7.23003	5.72361	4.50741	14.9162	10.163	13.8279		11.263	12.2803	9.34429	8.39615	15.3402	12.2554	18.0492	21.2651	18.9758	18.9132	15.5532	10.8773		13.8937	34.528	12.011	7.9703	23.2051	27.8744	8.54251	16.4695	30.9288	11.8033	21.4841	9.02243		36.4327	38.4863	25.126	26.2061	40.9553	34.1232	28.966	24.8758	19.6527	45.4869	33.577
47.04	8.93986	12.5184	10.2593	18.4206	11.6585	6.08792	5.97943	3.05133	13.2057	9.3798	13.0507		8.32541	8.54777	11.7968	7.08482	14.378	14.2425	19.9951	19.7114	28.3419	18.8537	23.4511	10.3822		12.9	31.6059	8.70191	9.10231	23.7026	37.6948	9.53662	15.1965	28.6061	11.1965	19.7915	8.26506		32.7912	37.5627	25.7431	23.3042	45.4129	37.22	23.795	25.6013	19.9518	48.1955	33.4727
48.16	8.42468	9.02097	11.7808	18.3976	5.48416	7.2699	4.91066	1.70398	16.3442	8.87564	13.0136		10.1449	7.66997	8.78348	8.91748	13.9401	20.5786	19.6158	17.7334	20.6372	19.4364	14.1008	11.1337		12.6515	32.578	10.1184	8.26225	23.3868	31.2371	9.94173	14.9239	29.3268	12.9496	20.6927	10.5354		36.0213	28.4473	24.35	25.3528	39.151	35.1107	17.8185	28.5762	18.3425	42.9954	32.9229
49.28	9.14798	7.73754	9.15195	16.2898	11.5002	5.84355	5.49604	5.07843	13.4089	11.4972	13.7409		7.04402	15.1707	11.3558	10.1695	12.693	14.1488	19.4592	21.4866	19.2545	19.0337	17.661	8.14904		15.113	30.177	9.46185	7.15792	21.3478	31.2796	9.54492	12.0255	31.7205	11.4872	16.7515	8.25043		39.9739	34.5931	22.6336	26.3398	41.4328	31.5351	22.1243	27.1868	21.23	47.5942	31.5475
50.4	9.24735	10.1786	10.9632	18.282	6.37617	7.35433	5.65901	7.2065	12.8374	9.90774	15.2614		10.778	8.73677	7.71434	7.53463	12.0628	15.8537	20.2414	17.2398	26.1193	15.8733	14.1416	11.2355		13.1861	34.0736	13.6462	10.3033	22.2158	36.327	9.16963	15.1367	29.5037	12.7335	19.9986	8.81102		34.316	30.7888	17.1629	19.5803	44.4781	36.6802	22.9796	23.1483	21.6885	42.2598	32.9526
51.52	8.32116	10.4727	14.3326	18.2865	7.34948	3.44535	4.41925	2.25373	11.429	8.08229	13.7564		10.2286	9.12359	8.23438	11.1142	14.6409	12.0467	20.5717	22.0084	24.6693	16.9944	16.3015	9.49803		12.835	31.8154	10.8112	8.49683	21.2819	39.0456	10.0783	12.6821	27.9358	12.9329	21.4323	6.30693		38.6366	34.4503	21.7014	24.5274	38.9331	38.4692	27.2104	25.6255	19.4466	45.6694	34.2301
52.64	7.52425	9.3648	11.0275	15.7654	11.9419	10.9884	4.44268	2.64881	12.1698	9.63644	12.6406		7.46854	11.2681	6.5673	6.77978	16.0292	16.1741	18.7538	19.8281	15.726	15.4164	9.3371	6.97306		11.6999	31.942	9.84543	12.4828	22.1228	30.9807	9.62892	10.5486	26.7136	13.6577	20.1604	9.32557		38.7685	27.8144	22.9868	21.7635	40.2657	36.7619	29.2239	26.353	20.9497	44.5651	32.9234
53.76	9.68421	9.59767	11.0725	22.7149	5.83305	6.72347	4.39625	6.27044	13.4153	10.2039	13.811		9.89832	9.38315	9.53015	12.1078	15.6354	16.3475	20.8248	19.7707	21.5019	16.4731	7.56383	11.3224		14.244	33.4664	8.83702	10.5564	23.3369	28.6245	7.17196	13.532	27.0912	12.6552	17.9597	8.1314		36.0582	33.3132	19.4186	24.8566	42.7977	36.4794	26.1656	28.252	22.2727	49.2501	30.706
54.88	9.56703	8.28471	7.443	14.1304	7.34732	6.7896	3.86463	2.83926	12.4282	9.94474	12.985		8.70639	8.49737	9.40241	7.54785	14.4451	16.0034	19.3952	23.1532	24.9027	17.086	12.2039	11.703		14.2562	29.645	8.44089	12.1147	23.3223	35.0387	9.48574	15.0597	29.9632	13.2128	17.3741	7.73685		31.9915	32.162	15.9393	21.432	41.8837	34.8693	20.6529	23.0618	20.6348	51.9564	34.8041
56	9.19696	8.32362	11.8002	18.0749	8.66663	6.7957	5.81672	5.31244	11.1784	11.2666	14.7968		8.504	8.23277	9.7491	8.75444	12.2047	12.1747	20.3572	22.4608	18.543	16.5355	13.7542	4.85624		12.8917	24.1151	12.4024	12.3038	22.5132	35.4436	10.2374	13.1434	26.1263	11.9184	20.048	10.0164		34.467	35.2021	23.9811	24.4319	41.7745	33.08	25.9005	26.5712	20.9265	43.9736	34.0934
57.12	9.79206	10.1669	13.6707	22.1499	10.5456	6.5851	7.3918	5.96349	12.4847	6.79555	14.5389		10.3864	9.53225	8.73909	10.0981	19.0615	13.8897	16.168	20.2127	22.2567	18.3558	10.2563	11.0703		14.7028	37.1586	11.872	5.72344	23.2876	38.2491	8.34567	16.0751	30.5716	12.6138	15.7026	9.96031		36.3494	38.4848	22.4167	21.8633	41.5266	36.4502	22.6713	27.8968	18.8883	44.3611	31.6695
58.24	10.3834	9.48967	8.04547	16.0258	12.7994	5.85527	6.22707	8.23811	7.42894	10.9684	13.9356		8.71626	9.38777	6.6006	7.16347	14.9661	14.7386	19.4991	21.6782	18.5806	14.2139	15.7891	7.26001		12.8683	22.3762	6.74386	9.93784	23.1983	31.9399	7.58861	14.5824	30.7869	12.8271	18.2768	8.62607		37.5331	36.1688	22.3255	26.7432	41.8293	30.6461	26.4963	27.7016	20.4607	44.1678	30.9637
59.36	9.97823	9.21651	10.2775	12.9893	9.22055	8.30976	5.32652	5.52079	8.70036	9.95096	14.1678		10.8487	9.63935	9.21998	6.75403	16.2504	13.6402	18.795	19.6401	22.9072	18.0803	12.8358	10.4658		14.0427	27.0625	11.3681	8.2117	22.0773	31.5076	8.10028	17.4217	27.7075	12.2316	19.8612	7.98328		35.7605	34.0184	24.0792	22.1366	45.1413	39.1497	29.242	24.4915	22.4901	43.3758	33.0944
60.48	10.1782	8.90876	9.22659	18.1045	14.6014	7.41577	5.19517	4.39091	12.6264	8.73088	12.5923		9.65782	11.0577	11.0653	8.82769	10.5678	14.3148	18.6396	23.1182	15.0585	19.3604	10.9417	7.47363		14.9821	33.1759	8.13503	9.57219	22.6717	39.5346	7.85715	12.6605	28.8067	12.1883	22.2804	8.7252		37.4767	31.6213	26.1331	20.6455	42.9078	32.6258	24.5222	27.0955	21.7191	48.5981	31.3107
61.6	9.42471	9.25279	7.67899	17.7211	10.4838	10.3337	6.12862	4.30244	13.3384	11.1744	12.8597		8.83259	7.91357	9.15702	6.75524	11.8639	15.9007	20.2774	23.5301	26.1506	17.9438	16.3037	8.77202		12.6157	30.6635	10.3092	8.68171	22.3522	20.6041	9.39078	10.0703	28.0429	10.3485	19.0923	11.2291		39.4857	32.3003	18.1042	24.1153	40.4026	36.5144	26.4979	31.26	21.9567	49.5289	30.7016
62.72	9.27	11.1263	6.88168	14.8089	8.0969	10.2582	6.59126	5.93816	14.6237	10.1862	12.564		7.54372	7.44065	9.88673	7.40882	15.0624	12.1211	19.1294	23.7945	17.579	21.2319	17.7003	11.4646		13.703	28.689	10.3301	8.83877	21.0547	26.4356	7.43603	16.3981	24.1564	11.5153	17.6595	11.1735		36.0382	34.2028	20.476	25.7502	41.2768	39.6616	25.5752	26.4098	21.6613	49.1624	32.4705
63.84	11.4093	10.282	9.21366	13.5551	10.9211	5.0823	6.5916	5.95404	12.5584	11.858	14.5302		9.52244	12.2673	9.75556	9.94901	15.2138	12.9694	15.5168	18.5076	19.2631	23.101	15.6461	11.5891		13.3574	35.0363	10.7146	9.37496	22.3257	37.7393	9.03028	16.3282	27.3209	12.9324	15.6737	8.11562		35.8373	38.7157	20.5851	26.8469	41.2175	38.7032	26.821	28.2905	26.2778	43.5545	34.4802
64.96	9.77416	9.30226	9.98658	18.1123	8.13071	5.70518	6.65155	4.66713	10.1109	10.1439	14.9916		10.1031	11.0652	11.8321	12.6162	9.67317	13.6556	19.9445	18.975	20.994	16.5257	12.5398	5.5174		13.0454	31.1828	8.38546	8.97281	24.3968	37.1718	8.89494	15.2655	29.0742	12.6301	17.6213	10.7729		39.2775	30.4572	25.4539	21.8965	40.8794	37.5968	27.2443	26.4929	22.5362	47.9682	33.0035
66.08	9.90627	9.36153	13.3939	15.8995	9.82985	6.49458	6.64587	6.89549	12.8545	10.2711	13.6309		7.45392	10.0908	8.5502	9.59472	11.7983	12.1988	19.4586	22.0816	20.5059	17.1002	13.3639	6.41855		13.0651	34.3329	9.02087	9.85946	23.9497	36.2268	11.0936	13.8375	27.6314	12.8385	19.7924	8.56475		40.7727	31.8654	20.8766	21.4303	42.9993	36.8669	28.7026	28.3496	22.9459	42.7538	32.1193
67.2	8.98008	8.38785	11.8774	19.2996	7.7293	8.91998	6.44284	4.07214	14.9016	8.72344	12.6344		8.59788	9.06731	11.0025	5.28609	12.2862	13.3485	20.0831	22.7186	21.6346	14.7605	15.3981	10.3495		13.6274	27.3335	6.27558	9.09635	21.1769	31.8254	10.3331	13.1163	27.9082	13.4364	16.1074	10.1459		36.7429	31.2447	21.8801	22.7652	42.9142	33.8308	32.5117	27.3423	25.5945	43.0386	35.1559
68.32	8.69887	9.25026	11.2156	17.7141	6.42581	6.69298	5.03883	4.39091	8.14133	9.24804	13.7549		8.89042	4.90386	9.89743	8.65769	13.6745	10.875	16.5834	20.0181	24.121	20.953	16.4852	9.85134		14.1257	27.1249	11.26	13.4039	23.7675	28.3596	7.74831	15.1392	27.7806	10.9203	17.6879	9.80364		32.4736	35.4178	26.8737	20.7689	43.0744	37.1273	28.328	28.2745	22.5879	44.132	32.5512
69.44	8.15308	9.75154	10.0177	11.6257	13.0684	7.12637	6.91496	8.8976	11.0735	11.9207	12.4899		7.8315	9.22229	10.4516	9.97754	16.6408	14.7063	19.5096	20.4948	18.221	14.9751	16.9734	12.2057		13.1247	26.7398	9.90839	8.81363	20.4288	28.2357	7.7953	16.3488	28.8849	12.754	14.737	6.92375		31.8995	32.3638	20.9715	22.2284	43.1804	35.2019	23.1713	26.0339	21.7634	47.3474	33.1526
70.56	10.3341	10.3112	12.8382	15.3419	11.0779	4.28446	5.4292	6.86105	8.77544	12.7219	13.7455		8.00226	10.0866	7.71958	12.1332	13.5694	12.8336	17.0357	19.7838	19.1276	18.9956	10.7394	8.09298		12.5915	28.0759	11.6082	12.3944	19.6509	31.6325	9.15118	15.1414	28.7249	12.5053	15.24	8.65484		38.3723	34.0483	21.5555	24.7701	42.7267	37.22	28.4063	29.6197	24.7263	46.055	31.4383
71.68	11.4985	9.95699	7.75922	19.9544	8.80547	4.88999	3.89098	6.31603	13.3996	10.8847	13.9171		11.809	11.8973	11.8999	10.8815	13.4666	11.7836	20.6412	17.7519	23.9571	19.4208	11.8944	8.82384		14.5454	25.3726	9.62258	9.70141	20.8252	22.2149	8.6988	13.5166	24.6518	12.4292	16.8	9.30519		39.1295	28.4056	16.6752	22.6155	43.2084	35.2814	24.1351	28.544	18.4783	45.2261	37.2522
72.8	11.2533	9.7874	9.70151	15.1804	11.4333	10.0049	4.14637	4.82652	11.962	8.0714	14.4986		8.23187	11.762	11.0812	9.89245	10.7993	8.86094	19.7294	17.1369	21.6927	17.7721	8.37792	8.57355		12.9553	25.338	10.5675	11.4247	21.5991	29.8598	8.78042	13.2527	28.5469	12.9351	11.7165	9.88699		31.6713	32.3331	21.7429	22.991	42.852	38.9903	28.3231	29.4514	25.6849	49.1278	34.1088
73.92	11.2954	10.3529	10.7666	12.3059	17.8788	8.61088	5.62162	3.92558	10.3903	10.6544	12.7409		12.1985	12.5096	12.3219	11.7103	14.4842	15.6709	17.751	22.3999	26.9366	17.047	11.61	10.9649		14.943	27.5269	11.9734	10.758	22.8067	29.9015	8.52337	13.0125	25.3894	12.1078	13.2503	7.56259		34.6154	30.1868	19.5125	21.5886	45.7407	31.9736	27.5351	28.8295	21.2939	44.0688	33.8668
75.04	10.9032	11.0146	9.39558	21.3439	9.37017	5.11419	4.60574	6.65168	10.1255	9.0444	15.8808		9.55646	6.90515	10.4481	10.0442	12.3249	13.6689	16.9468	20.0755	24.5239	12.3872	20.9159	8.4878		14.0057	32.9504	8.47655	8.22675	21.5186	23.7577	8.97686	14.4848	33.1103	13.9819	17.4263	9.74068		33.3106	30.8515	19.3334	20.6418	43.6226	38.8012	30.0387	31.3377	17.5136	48.4558	32.3812
76.16	8.67636	9.53154	6.55664	20.4009	10.7413	8.38434	6.22483	7.5668	12.8456	9.51557	13.7531		10.0228	9.34409	9.69825	10.3388	17.7472	17.9671	17.2219	19.7407	18.2288	14.1548	15.8627	11.0288		12.7385	23.8508	10.9575	8.71679	23.3752	18.8919	10.2924	15.239	32.9296	12.5884	18.8286	8.92198		35.8356	30.9101	22.3259	19.1633	43.2459	37.2225	27.3708	29.755	19.134	48.595	34.073
77.28	10.7326	11.3149	8.568	19.5776	7.11784	7.08041	7.25769	8.06319	8.25378	11.2749	14.3499		10.4919	11.3647	12.1879	13.4854	13.8214	13.2398	16.9907	20.5576	16.2843	19.4262	15.3016	11.1364		13.3499	24.8228	10.3911	7.52882	23.2266	28.1231	10.5538	15.7086	31.3176	11.6504	19.8102	9.91625		40.1783	33.0174	20.6418	26.9384	38.695	35.8901	28.2464	23.1096	21.7695	42.1838	33.1127
78.4	10.4987	10.9678	11.8366	14.5645	8.6803	9.71172	5.96763	5.94222	13.5348	9.35947	14.0106		9.43502	10.7725	10.7609	11.9665	11.7365	12.9407	15.9652	19.8524	17.447	13.7901	12.9673	10.7158		14.1829	22.6076	13.3161	9.17175	21.1185	23.3888	9.39095	12.3827	28.7678	11.1402	17.3377	6.02187		40.0772	34.3246	26.1041	26.662	43.652	32.4413	25.912	26.1968	24.8681	44.0489	35.002
79.52	10.5961	8.4176	11.2823	17.2513	12.5037	7.94672	6.06841	6.42746	13.0377	9.18283	13.4153		10.414	11.0724	12.4718	12.7352	14.1389	11.7873	19.426	21.6928	20.6655	21.3509	14.852	11.0013		13.6884	34.3523	10.8778	9.42991	19.3862	29.9308	8.8599	15.0939	32.2187	12.1455	16.3753	10.541		36.5446	37.6324	22.389	24.6278	41.9564	37.8934	23.9954	27.421	20.8297	40.3496	33.0072
80.64	10.419	8.8903	11.4172	14.4219	10.6024	6.49223	7.43901	7.64075	11.603	11.591	12.6064		9.71259	9.69311	11.797	10.7862	15.2207	13.4875	17.5943	24.5208	18.9878	18.3846	17.34	8.86838		12.7839	25.4807	8.24617	10.3072	21.5164	27.2841	9.87571	12.1407	30.001	12.0331	16.6969	11.1859		36.588	28.3935	21.7811	21.9231	43.9355	33.7516	28.8433	27.9858	19.2473	44.2178	33.9966
81.76	10.9844	9.0118	9.21513	16.7146	7.48687	5.95096	6.52088	7.4189	12.5623	10.6485	14.7836		9.7796	8.85101	8.74292	10.8716	12.6372	15.0291	20.5214	19.2351	18.4799	16.4448	22.4047	11.8012		13.0064	23.5383	9.59138	8.64167	21.8693	25.5219	10.9084	12.3165	29.1813	13.0391	14.9977	12.8688		37.2641	28.7889	22.308	23.4356	43.1962	40.7588	27.9732	28.5419	24.372	44.804	35.6075
82.88	10.2864	8.63876	12.1102	15.3284	9.79892	8.63668	5.02444	7.90144	13.0427	10.6129	14.0655		9.41665	8.77457	7.42859	11.1351	13.1274	11.2614	16.1921	20.4481	17.8173	14.6742	12.3226	6.44552		12.7071	27.608	12.3701	5.83391	19.7584	26.8603	9.28809	12.4646	25.5258	12.0558	15.8793	11.3493		40.7892	31.5184	26.4035	23.5307	42.1323	31.0149	27.1282	24.6794	22.4054	51.6095	33.4123
84	11.5031	8.98448	12.5114	18.316	12.1354	11.6188	4.38135	3.2249	7.5695	11.4746	12.7873		10.5712	11.3462	10.1366	11.4829	16.516	16.1971	19.2713	19.516	15.1465	15.0024	16.2465	11.3397		11.6036	30.3079	9.92705	10.7607	22.1247	30.4236	9.54654	16.7627	32.4576	13.4637	16.9109	9.5822		35.7614	30.3727	25.9987	22.5763	42.5388	34.3547	21.4858	29.9762	22.9523	53.5555	34.8377
85.12	8.7665	8.78526	8.29968	21.0573	8.70116	8.27271	4.87922	5.44245	11.1432	10.9791	15.0591		12.7057	10.1832	12.5031	10.6924	13.9348	13.3591	21.0447	20.731	21.0642	19.2336	15.3909	6.90579		12.8514	39.8036	13.4217	10.0716	23.1766	27.3967	9.65648	14.8858	28.4574	12.2103	15.0842	11.8278		29.7881	30.5538	25.9784	25.6989	43.4613	33.6828	28.8723	29.1646	21.5443	45.0854	33.1615
86.24	10.0598	8.07873	11.4137	16.9552	5.75464	10.4336	5.18431	6.28159	12.468	11.1515	14.3534		7.43249	11.3546	10.8411	11.1559	14.1822	14.1071	18.0087	18.474	14.5889	15.4749	16.6868	9.60287		11.7666	25.0618	8.18294	12.2009	21.0871	31.7933	10.7825	14.6791	31.8272	11.9778	19.2047	13.5483		39.543	31.0824	24.5899	25.6521	45.6032	32.7659	23.4976	28.9932	22.5456	47.6984	31.6178
87.36	9.61941	9.33864	8.13657	14.2862	12.334	10.0916	6.92443	7.39121	10.1949	10.3408	13.7002		12.0322	7.36295	11.0943	13.6831	11.0941	14.919	15.8717	22.1857	14.6995	12.1131	15.7326	9.41501		14.9406	26.3353	11.7937	9.91115	21.2826	32.2048	9.1068	13.3106	33.9613	12.3252	16.0272	11.7925		40.6118	31.6913	23.568	24.2713	37.8835	36.0522	35.4545	27.7757	21.0986	47.3628	33.8825
88.48	10.1993	8.07156	12.7362	14.4493	9.24429	6.90499	5.79346	5.9179	11.6645	10.1205	12.1139		7.82537	10.3693	11.3986	8.8183	18.0083	19.0981	19.6821	21.8778	16.3049	14.957	8.27428	11.6488		13.5648	31.8078	14.514	8.76521	23.0031	25.4452	9.48151	11.5291	31.3275	12.0943	16.0125	9.07125		40.0112	33.3781	24.7363	25.4256	37.6137	35.4752	26.47	28.9129	19.9162	47.6285	36.5316
89.6	10.48	6.55526	9.61805	15.5034	5.52732	10.2657	4.67637	8.29957	8.57973	10.8425	14.8952		9.12921	10.3554	12.1592	11.8499	12.0222	13.5606	15.8001	22.0824	17.4406	15.9606	10.1104	11.5715		12.9134	31.0595	9.74849	9.17729	20.2817	29.0577	9.96766	14.2606	29.7874	13.107	20.5553	11.6593		39.1703	27.873	25.7914	24.3149	42.2613	33.3254	28.4704	27.9027	21.2536	49.7896	31.14
90.72	11.1719	7.18036	9.47522	18.6469	6.53587	10.5532	5.17656	9.14141	9.79564	10.4087	14.559		8.54039	9.31259	11.5833	11.565	13.9496	17.3152	16.7584	21.2947	19.8022	14.3816	11.8394	10.6607		12.6937	26.1614	9.57467	10.694	21.3306	21.9009	9.1401	18.996	29.5954	13.4171	16.3765	10.6846		33.7858	30.0511	28.1199	21.3771	42.1324	36.4729	27.2191	24.9099	19.5115	39.9278	33.7498
91.84	10.3778	7.84217	9.89665	15.0733	12.1469	12.0231	4.95777	6.97856	8.49042	9.72932	13.1563		11.8417	14.807	10.6388	9.65789	13.7728	14.945	17.8983	22.9517	14.1788	15.4924	15.516	8.49265		14.1352	27.5734	8.8568	10.6997	21.8952	28.5374	8.3006	14.6185	26.2681	12.6027	17.0905	11.7289		40.2082	34.4168	22.249	30.5456	40.4573	38.3234	26.1886	25.362	26.9282	48.6112	33.3118
92.96	11.6056	6.81545	10.8865	16.8212	9.54138	7.96126	6.26411	9.02457	13.7014	9.60011	15.78		7.06239	12.2286	11.3223	9.7663	14.5241	12.7803	18.4635	21.7876	16.1701	9.02442	6.80335	10.9664		13.7463	31.6499	12.4102	10.475	20.0308	26.2966	7.83359	15.5485	29.1113	12.0513	12.2509	10.2613		36.2661	28.8121	25.6523	24.0595	43.9531	35.7995	27.4595	31.1939	21.3514	53.0901	30.4339
94.08	9.85163	7.6441	9.29125	15.7527	9.82553	8.70751	7.20851	7.4162	11.324	9.20149	13.1057		10.7167	8.02907	9.41754	11.4383	15.805	10.4328	13.5527	14.6568	20.2073	17.6868	18.8403	10.3146		13.1196	28.8402	12.5481	13.0229	21.802	31.3998	8.5551	13.7337	33.7811	12.3898	13.9778	8.9473		34.3985	33.8465	26.9897	23.8948	42.8439	38.1056	28.8789	28.8734	17.4266	45.2186	33.5597
95.2	11.6434	8.24389	9.17604	16.3111	6.28194	6.38107	4.98198	9.13297	9.09464	9.93385	15.0476		7.74986	9.99383	11.9709	10.3207	8.75042	13.6923	20.1632	21.6265	21.5608	19.022	15.9334	10.7937		11.5609	27.9196	11.1572	10.2945	21.9851	33.6255	9.53749	14.462	31.7047	12.5495	15.1288	10.0959		38.2877	33.574	16.824	20.7093	38.5625	35.3373	20.3615	27.689	21.6028	45.6622	35.1676
96.32	9.33693	7.8234	8.87158	16.5871	5.91722	8.28068	6.96491	8.71188	5.77535	11.5594	14.3557		8.59686	10.3802	9.69764	10.3209	15.1311	8.4508	17.0829	19.2779	18.3685	15.8484	18.4879	9.5956		13.0633	29.8671	9.17019	11.4142	21.6834	29.8683	10.6382	12.5305	30.4236	12.3222	17.9667	11.9985		36.1142	27.9822	22.8459	25.4083	44.3018	36.6946	30.1729	28.9	18.8571	48.4415	33.747
97.44	10.2903	6.3496	13.0451	16.2648	7.49766	7.82806	6.13146	6.81343	9.22345	13.6342	16.308		8.78769	13.8843	10.1749	12.5369	14.8993	6.0293	15.2085	20.0921	19.9313	14.917	10.703	11.6585		14.1526	31.8956	8.02332	13.3772	21.9267	29.3888	9.19261	16.7125	33.9594	12.8713	17.2075	12.7409		40.5892	30.7286	28.0084	23.9348	41.1061	34.979	24.7522	29.6378	20.9363	44.7912	32.7169
98.56	10.8462	8.41011	10.5811	15.8761	9.02632	9.09306	5.71086	7.89604	14.9617	11.6214	15.6606		11.8491	8.66327	12.0611	13.792	11.4189	12.2671	15.3302	19.0066	17.7726	20.5912	19.4106	8.16934		12.5733	32.5113	8.82086	9.81033	20.427	26.1348	11.3116	11.4774	29.4337	13.3492	14.7876	12.7258		35.3023	27.3854	20.9057	20.4932	43.4608	33.4313	27.4519	28.181	24.6113	50.4789	31.5334
99.68	8.91777	6.94454	9.10345	20.1376	9.53059	8.80084	5.73524	4.96835	6.42689	11.1592	11.8668		10.4739	8.47889	8.96551	9.51224	10.7576	13.2928	19.5463	21.2439	14.3229	14.4367	17.4051	9.54257		13.2854	31.888	8.87964	9.98584	21.8341	24.7027	9.27933	12.9497	29.7287	12.9618	13.7988	12.067		37.0397	31.2878	26.9229	27.5839	43.0637	37.1509	29.0443	30.6521	23.4763	44.5211	33.6944
100.8	10.9044	8.43289	10.0974	18.9712	9.58886	8.93358	7.25338	5.33878	15.0966	10.5257	17.4639		9.72416	9.87581	13.0921	11.8045	11.7653	13.2861	17.2036	23.5779	18.5991	15.0458	13.0187	8.98201		12.175	32.9529	10.2833	9.7903	22.4735	23.0426	7.92392	13.6672	36.7393	11.4848	16.7343	10.6833		36.0196	27.5975	22.5382	27.9364	41.1284	36.6605	25.7587	28.3658	21.7534	46.8421	34.0473
101.92	10.8442	9.08974	9.59483	17.7978	6.50854	6.08323	6.93632	11.5714	7.88122	11.0021	14.0672		7.17158	15.55	9.37355	11.593	13.9007	10.9367	15.1259	19.7299	15.1805	19.2034	15.4724	9.29289		14.2357	30.7243	13.4721	12.0504	21.6444	25.2816	10.0518	14.2224	33.4167	12.0179	17.5113	9.28185		34.0136	26.6462	22.6124	21.8014	39.9945	36.6464	22.7984	29.3912	21.6824	46.8918	32.3162
103.04	9.78542	6.93389	10.9964	20.1987	10.4377	12.1948	7.4732	10.3017	8.85373	12.1427	13.6087		9.47788	11.4453	9.94263	10.8904	14.688	12.3855	13.52	13.3578	17.4619	14.6844	12.1131	9.69317		11.9693	27.4442	12.4241	11.6511	18.9093	23.8031	9.84328	11.6276	29.2871	11.423	12.533	10.9487		39.9587	27.1338	20.1163	25.3574	40.0512	40.1624	27.8746	33.548	26.0274	51.3288	35.028
104.16	9.64799	6.89201	11.25	13.1148	6.69413	12.6263	8.7034	6.12794	11.7787	9.50246	14.884		12.2975	9.37433	8.1022	11.2998	12.1261	7.99998	17.2758	15.0229	10.9866	12.7036	14.8399	10.7825		11.2191	24.5348	10.7967	10.2096	22.2824	21.7902	9.39362	10.5704	28.8717	11.9739	16.6665	10.2228		31.7498	25.4154	19.2915	25.0172	39.9194	38.8463	25.5561	29.2828	21.0499	49.235	34.885
105.28	10.4818	6.42817	9.27597	17.0032	7.8444	10.3036	6.34456	8.28302	9.5711	10.9175	16.0061		6.02456	11.589	9.32673	11.5224	13.0291	9.27908	17.3807	17.9164	21.3309	16.4819	14.1816	9.38986		12.0733	31.3889	12.6339	11.9335	21.9828	20.657	10.5331	14.9295	30.891	12.658	15.5694	10.2565		33.9524	28.4145	25.7495	24.3774	37.888	38.0666	24.7582	28.9604	27.6122	51.95	32.774
106.4	9.46667	7.22181	13.805	14.9745	3.77063	10.5626	6.16109	6.11713	10.3828	11.3297	15.7909		10.1245	12.3219	8.00776	9.5239	10.9659	12.1817	16.0142	18.4979	14.2462	17.4854	14.8199	11.1582		12.3492	29.8181	11.5968	11.1921	23.6191	30.0254	9.92815	14.9141	29.2961	12.2178	13.4902	12.083		34.7074	29.1596	20.0988	28.3068	43.5352	38.2404	23.7682	32.2366	27.8259	48.0006	31.8955
107.52	10.4181	7.16591	9.19309	17.8675	10.255	10.7352	9.12382	7.58807	9.78674	14.3572	16.5909		11.2426	8.01311	8.30178	12.2795	9.11657	12.1494	14.0263	13.6445	14.8506	16.6472	15.0922	6.87852		13.7137	28.586	8.30217	12.4982	20.588	26.4205	9.13941	17.4091	30.8525	11.8103	18.5938	12.4072		36.9026	26.6831	23.2244	23.2198	41.018	35.357	28.5	23.0781	27.1409	47.6567	34.8241
108.64	10.661	6.33747	10.1538	19.3689	10.7132	9.20328	8.51631	6.05601	13.8369	11.58	14.9411		7.48181	10.4352	8.61336	11.8527	12.4623	10.4972	14.338	19.2439	16.8228	17.7824	12.6921	10.8773		12.3755	28.1899	13.888	11.835	21.8028	21.1924	8.3853	13.7426	33.2191	12.823	15.4453	7.71088		33.449	29.2765	21.0972	26.948	41.1132	36.4846	27.2082	28.198	22.5305	46.549	35.1179
109.76	9.40601	5.99122	8.93153	15.5502	5.29784	12.988	7.46881	6.88773	8.70605	13.2851	15.8963		9.23228	13.5873	10.0409	13.2409	14.7229	11.7866	15.4864	17.4918	16.4929	17.7063	16.2908	10.3198		14.5017	28.6358	10.0315	11.2682	21.9481	21.0912	8.48809	13.7651	26.6958	13.0202	9.11798	11.3453		42.4581	30.3694	21.2801	26.9201	43.6927	36.5288	30.0689	33.2455	22.0266	45.649	34.8857
110.88	10.9074	9.72866	9.95984	14.2948	5.66976	6.93078	5.52998	8.8743	10.4123	12.18	15.1489		7.84918	9.42599	10.3212	9.57245	16.0395	10.6476	15.4304	16.4479	16.876	17.0953	19.823	9.13321		13.3153	30.0867	10.6831	12.0491	21.9126	29.367	9.62991	13.1104	34.0833	12.7198	12.9872	12.8964		34.7807	24.5146	23.4565	26.5776	39.6308	40.1062	27.1616	27.9469	22.4965	51.3684	33.1263
112	10.139	8.99165	10.2058	17.7055	7.05957	9.26191	5.69562	6.61859	12.0684	11.0621	15.8786		10.9474	7.93541	9.23552	10.8281	13.1373	12.7763	16.1237	16.8248	19.8987	21.0027	12.6649	8.1148		12.8076	27.6122	9.18913	10.5504	20.8649	23.9516	10.6938	15.6522	27.695	13.4902	15.1095	11.0108		37.8334	25.2763	22.1845	24.6305	42.2723	42.0024	25.0698	30.8875	21.4166	47.2349	34.8649
113.12	10.7979	8.71101	9.67888	19.1127	3.09011	8.79099	7.04562	2.44384	10.6756	11.5738	13.5957		9.43536	12.2673	8.10664	11.3165	14.4831	9.8046	14.4834	15.705	19.5929	14.7073	11.2841	6.17736		11.1371	28.9955	6.96643	8.5985	21.6048	27.8791	9.39954	13.7131	28.3092	11.397	14.4902	9.66111		42.2689	26.9306	21.8705	26.8615	39.1192	34.3314	21.1271	31.837	22.2061	52.0452	33.3404
114.24	10.0144	6.32492	9.9619	18.7186	1.49887	12.6127	7.39146	7.26627	9.82482	12.5577	15.9506		8.05736	10.4121	6.69685	12.3663	14.6443	9.43247	16.3448	16.0429	20.0711	14.642	11.9302	9.33653		11.7667	17.5524	8.92978	10.8715	20.7999	22.914	10.4467	11.6477	32.3064	11.4503	13.3892	9.50082		39.6689	27.2662	22.1624	27.0817	39.2348	41.3511	26.7608	30.6004	21.6075	52.3842	31.2828
115.36	11.6401	8.15287	7.30429	18.7437	9.58239	8.32618	5.97366	7.76333	10.4461	10.5276	14.6656		8.18866	10.3311	10.6602	11.9701	11.9045	8.96231	17.6539	19.4682	16.1637	11.111	10.2069	9.29986		11.6974	22.926	8.97797	9.47407	21.8739	22.8638	9.15965	15.6196	29.3363	11.0259	16.9028	10.2271		40.4083	26.668	22.6451	24.2374	37.6986	35.2041	22.9785	29.0236	19.1875	51.4519	31.5621
116.48	9.90655	7.8601	10.8506	19.9203	9.51764	11.1113	7.55848	6.80297	12.7797	12.3512	16.5412		7.32261	10.5457	10.6572	12.2203	10.8869	10.3124	16.7807	18.6875	19.5979	17.8092	11.6378	9.51652		12.3194	31.3551	10.6842	8.81832	21.975	22.6501	9.82297	18.1787	29.4225	13.439	16.0402	10.1867		42.0198	26.2449	22.4517	27.7495	39.3967	36.1032	29.2902	32.7816	23.7546	47.3467	33.4584
117.6	9.76748	6.26997	8.05781	12.3637	14.323	10.7178	6.26652	5.61061	10.2426	13.6903	14.8583		8.78021	13.9931	9.28799	12.1393	9.45425	11.4108	20.4181	20.4154	15.4997	16.063	19.0333	9.09533		12.1771	27.9306	5.46049	10.4128	22.037	20.745	8.33981	15.1266	30.3197	11.8082	17.0571	12.9329		39.3252	24.5297	24.3951	24.415	39.0087	40.3141	30.4149	29.5614	21.5322	48.5695	32.0574
118.72	10.7095	7.49318	11.7205	15.2763	7.67463	7.37074	6.26248	8.53426	9.50136	12.3608	14.7552		7.23757	12.728	10.652	11.1257	16.3912	12.3528	18.6402	15.908	19.0921	14.4586	16.1814	10.1674		12.4011	29.8384	11.006	10.6777	20.6114	27.0202	10.6155	13.4504	27.1812	10.8642	16.017	12.2138		35.9189	31.0385	21.6605	22.8829	41.6592	42.2426	25.3808	30.3415	19.6332	47.7285	36.8626
119.84	9.63537	7.59253	13.4118	18.6416	8.4609	8.80131	6.10623	7.39897	11.7581	12.2617	15.8823		10.4524	10.2177	5.40109	11.6778	7.98134	10.0854	19.8308	17.8166	13.0027	15.075	14.2581	8.62506		13.0209	26.2872	9.41839	10.4674	21.0248	25.7527	9.06585	14.8451	29.7855	12.2933	16.8157	8.70219		41.1264	26.5533	22.0257	25.255	40.9773	42.3995	25.2007	33.3007	21.3517	45.8722	33.1491
120.96	10.0378	6.18507	8.86835	17.0987	6.0021	12.5963	8.21535	6.0111	11.7047	13.0723	15.1878		10.5263	14.4983	7.92361	12.2042	13.9189	8.88795	17.2282	19.01	14.2285	15.036	13.4683	9.64166		12.7535	31.6431	10.7279	10.6013	22.3313	23.473	9.61958	16.0276	31.2605	10.5197	13.5065	7.87149		38.6318	24.958	23.6384	26.5885	41.5838	36.7616	29.2277	32.9866	19.6816	52.2619	31.8228
122.08	10.3146	7.74894	9.04938	23.9551	2.08515	8.5743	7.41911	7.45908	9.61879	12.0978	11.6015		7.87708	9.68261	10.3709	11.919	12.2289	11.5162	19.7858	19.9206	19.705	12.9952	14.3982	9.82649		11.4127	29.4642	8.2796	13.1736	20.6538	25.5389	10.6747	15.4324	30.0532	15.046	15.4483	9.70895		34.2791	22.4295	21.747	24.844	41.6411	36.4944	24.992	30.8808	23.0938	49.7629	35.0305
123.2	11.3636	8.64277	13.0092	19.259	7.44227	11.3463	7.54556	6.42071	8.52636	11.0577	16.6043		10.05	14.8515	11.4315	8.8578	12.0897	13.6533	18.0081	14.1435	13.5063	15.0477	10.8438	9.69681		13.7136	31.6169	11.9539	9.44411	21.273	21.5916	8.5692	13.6586	29.7879	12.2674	15.096	11.3261		35.5501	25.0317	21.9115	23.5191	39.3214	33.1574	21.7108	31.0186	19.532	51.5632	34.0165
124.32	10.5497	8.74802	6.98659	23.899	0.901798	10.6733	8.24782	8.87734	8.64343	11.0597	14.8739		9.01492	12.6012	10.7918	11.7965	12.8531	14.7836	18.2609	15.473	15.5834	10.0933	13.3675	11.5815		12.6045	33.9022	9.62481	10.1399	20.1746	31.2569	10.3902	11.1226	36.5698	12.6109	13.6391	12.9467		39.4545	24.2022	18.0633	26.254	39.73	40.1339	25.6404	29.1302	21.8142	44.6542	31.936
125.44	11.7874	6.96869	9.06466	21.2762	6.58983	12.3745	6.8631	6.5595	13.732	12.098	14.8024		9.67959	13.0665	10.1917	11.4556	11.1146	12.0727	19.0396	19.0035	21.7991	17.3235	13.1881	8.58446		11.9954	30.5596	11.4553	12.0052	22.8885	22.1762	9.44276	14.9972	27.6637	12.9909	18.6071	10.6782		43.4279	22.2403	19.1506	23.8523	39.6075	35.759	23.663	30.4961	21.6666	44.8446	32.1853
126.56	10.0345	8.65869	15.9877	22.252	6.70133	13.3566	9.92954	9.2829	9.42984	12.5325	15.2732		8.39718	13.0985	7.62676	10.2116	12.748	8.91296	20.0556	18.0293	12.3004	20.48	16.2665	9.79498		13.417	31.9083	9.84543	13.1122	20.7396	23.2744	9.57857	10.6059	29.5763	13.1369	14.1559	10.3399		43.1537	23.0023	24.8708	23.1699	40.2044	34.8267	23.2386	30.7231	24.9888	47.6815	32.9271
127.68	9.17176	5.94998	9.69123	23.2241	5.0734	10.798	7.34951	5.81322	11.3097	10.4805	14.3649		11.8175	10.5608	7.69981	12.3321	11.0414	12.1581	16.6576	12.0608	8.32565	13.6145	19.0025	8.99746		11.8378	27.7077	8.17542	11.8324	21.445	28.0825	11.2115	11.2649	29.9034	12.786	15.7671	9.94666		37.0779	23.4059	23.5846	24.4379	40.5133	35.6189	22.4846	30.8785	25.053	46.8372	32.5489
128.8	9.1467	5.18303	7.81359	19.1602	7.86742	10.7896	7.5453	10.1035	13.9337	12.4903	14.2952		9.7847	9.17357	9.99752	11.8706	14.9501	12.8717	19.0099	17.8806	17.2285	15.313	18.5551	11.2591		11.9545	33.5652	9.17715	12.252	20.3164	25.4538	10.9947	15.0825	28.8768	13.7971	15.5565	12.1665		37.4246	23.5486	19.4112	24.5503	39.148	36.8313	22.7014	30.2326	20.4402	49.8923	30.9225
129.92	10.5275	8.02758	8.23208	15.7072	7.52356	10.4509	6.56869	10.2737	10.5611	11.5334	12.9336		8.8598	9.55451	8.17888	11.4363	10.9772	9.07201	18.2613	18.8139	15.8828	17.0724	24.1737	10.681		12.1905	28.2085	13.5459	10.4764	21.9311	15.2331	10.6059	11.6646	31.7283	13.7945	16.0827	12.9599		31.0022	23.6777	25.6708	30.2489	41.3005	37.1644	25.2982	34.3984	24.6739	49.1647	34.3134
131.04	9.60871	8.84284	10.0048	16.2992	12.1476	13.9955	5.35279	7.02719	12.0869	10.5619	13.7586		9.85206	6.88919	7.24051	11.3886	11.4686	15.3959	15.766	13.9143	12.5756	10.2406	18.0533	10.6934		12.8822	32.974	12.0266	11.1549	21.2404	30.1994	9.26286	11.005	29.67	13.2415	13.1038	11.1412		44.2411	27.17	27.2025	24.8393	40.5109	34.3255	23.5015	28.2241	24.1771	48.9404	32.745
132.16	10.261	8.22438	6.74384	19.5903	10.2061	10.5114	8.42061	7.24398	10.444	11.5256	14.5876		11.093	7.98371	6.90733	9.43811	12.9259	11.7479	17.3921	16.6255	17.7882	15.4671	17.0134	9.41319		13.2991	23.7241	10.902	10.4411	21.7345	22.5044	11.1331	13.5459	31.4363	13.9212	14.287	9.72144		42.4394	25.2464	15.9876	23.7858	42.7894	37.5468	20.7854	31.2267	21.9497	46.3188	33.7987
133.28	11.1391	8.96128	10.7995	17.1447	8.18394	11.6718	7.62661	6.77899	8.79288	10.9303	14.9056		8.38494	12.4756	9.1104	10.0797	13.876	15.3572	14.6037	15.0013	11.3023	14.5523	14.9986	6.20493		13.411	29.0699	14.9839	13.7255	21.4209	18.9014	8.7958	11.457	30.8783	13.2659	17.0761	8.7566		42.6772	20.8453	19.98	28.5782	39.9821	35.2446	32.0079	30.3789	24.5014	50.4082	32.5067
134.4	10.4627	5.57863	8.10953	15.4186	8.81842	10.699	7.21221	7.84032	9.77464	9.67721	13.0369		9.35848	8.49359	8.52679	11.4232	10.3781	10.7663	16.9217	18.3473	16.4645	12.7153	12.845	8.7396		13.5275	28.9347	14.2853	12.5486	20.8932	23.2034	10.4798	11.183	31.579	13.0395	18.3148	11.0042		42.5779	19.5871	25.1038	25.9886	41.7454	34.453	26.0434	35.0252	22.9906	51.7277	33.4757
135.52	9.91276	7.30471	7.66753	16.4977	10.8226	8.82758	8.45989	6.59124	13.8344	12.658	14.7152		12.8523	12.4932	10.1315	13.223	12.66	11.5112	15.6447	16.387	15.0706	21.8034	15.9041	10.7122		13.3097	32.507	6.91128	10.8091	20.0263	26.0175	9.00749	9.71711	27.1615	12.7021	15.6782	8.89732		42.4616	27.4632	19.6608	22.7894	38.7096	30.76	26.8429	30.2062	23.1748	44.0985	33.5697
136.64	9.11228	8.28386	8.30438	14.0631	3.31527	7.39795	7.46666	10.0484	10.9948	10.5397	13.4839		9.45373	9.62465	6.26561	10.7796	15.0769	10.3588	15.788	16.6298	20.5343	14.3065	17.428	9.19957		14.35	23.6717	10.5307	12.0161	22.7663	25.1113	9.65828	14.7407	30.4865	11.6087	17.7828	9.49408		46.9561	19.4068	21.3607	27.3524	38.4634	32.8991	25.2719	31.0956	25.5649	52.4598	34.4157
137.76	10.1596	6.98715	10.232	17.0684	8.5911	13.4856	6.70074	6.80634	10.007	11.8324	13.3635		9.79219	11.8935	9.10536	10.1333	10.3	9.35978	16.1211	17.9465	17.1058	13.1893	9.52079	8.40599		13.646	25.0686	11.7054	10.4277	22.4776	17.4958	11.0282	11.2667	36.2671	13.6083	14.4386	11.271		39.4879	23.563	22.4494	26.8183	39.0532	28.4152	29.8854	30.4215	22.8592	47.1141	34.1594
138.88	8.50549	6.02687	9.68917	18.6604	8.41414	12.3942	9.35114	11.9502	10.2995	11.7629	14.0932		12.1441	14.6016	11.9891	14.5648	10.4973	10.7239	14.6703	12.7625	16.6298	10.263	16.3015	7.1076		13.3803	24.6429	9.73986	13.749	22.8065	31.5559	10.8551	11.4244	33.6612	12.9927	16.8449	11.2439		42.5089	24.9783	18.8351	20.124	39.3602	36.1935	31.2407	30.6216	29.5169	50.2227	36.8424
140	9.52126	5.21425	9.06525	16.501	5.67623	10.0785	8.6102	4.04614	11.5193	9.90863	13.1277		4.86291	13.3727	8.99416	11.3185	11.4124	16.3959	18.441	20.4088	16.041	15.0692	13.8035	7.59332		10.7306	32.4285	11.0488	12.7959	21.8394	29.2904	10.1291	15.4351	30.8163	12.0385	15.4037	10.8913		40.8561	21.5907	21.537	27.08	40.9182	34.4539	26.1108	29.1772	21.3396	50.5948	34.6093
141.12	9.00231	6.92376	7.5682	14.0844	8.96014	8.20094	8.53836	6.87624	8.31499	11.0159	12.9582		9.899	10.2068	10.0627	16.9275	12.4646	8.83993	16.2668	15.7104	12.2975	13.9515	21.2747	9.83528		12.5935	25.6226	9.80058	11.4311	22.8144	23.6745	10.972	13.5234	30.0683	12.6807	16.1348	11.2511		38.1449	21.5321	24.4223	26.7126	37.8147	33.3779	21.5219	28.7564	20.784	42.3208	32.9772
142.24	9.23063	8.16638	10.3569	12.6142	15.6121	13.8458	8.30054	1.48111	8.22389	11.5264	14.0115		12.5267	12.5987	7.14243	12.0009	15.1463	9.90196	17.6505	16.9342	13.3269	15.076	15.8384	10.7992		12.8463	35.1233	12.9682	11.5017	20.9242	25.8567	9.76966	9.95516	29.8319	13.8531	15.4166	11.6745		38.8644	17.7986	17.0017	20.7615	37.5238	33.224	29.4457	32.4904	21.8915	46.4448	34.8895
143.36	9.84386	7.6305	12.1916	16.2349	12.3275	12.0255	7.71128	6.78135	12.189	11.9598	14.9658		12.8577	6.43308	9.33218	12.8473	13.2242	9.54117	17.8702	17.3192	18.9325	19.1185	25.0964	9.09442		12.021	25.49	9.78471	11.9355	20.3317	22.8307	10.0934	12.1915	31.0803	12.5172	11.413	11.5472		40.0268	22.1776	24.828	23.1752	39.0747	35.2907	22.7337	30.1525	24.6839	45.9752	33.7322
144.48	8.94061	6.44958	9.83817	16.8888	8.96158	10.5189	8.1237	6.29205	11.6948	10.1312	12.7734		9.68946	9.57845	8.04993	12.1708	15.4643	10.8386	20.5578	15.1501	19.5823	15.9918	20.3155	13.5011		12.2214	30.9303	9.49109	11.0808	19.7587	21.5282	9.41485	9.98164	30.1198	12.1803	17.6463	12.0947		47.3957	18.9391	24.7474	25.4282	43.766	37.4405	22.9736	28.1227	23.2229	45.1332	33.8193
145.6	9.34116	4.72709	8.79928	17.4493	8.51341	13.351	7.96177	6.79182	12.363	11.528	14.5532		12.9812	13.6877	8.32701	14.29	9.41517	6.13467	19.3115	17.5257	14.2569	12.513	19.4885	10.1374		11.1461	33.3313	14.7059	13.293	22.2216	17.7521	11.4687	13.1335	31.1445	12.0534	15.6879	10.8967		41.4397	16.304	23.8466	24.8815	43.0913	33.3708	31.1553	31.6217	24.9253	51.2434	33.812
146.72	10.2462	5.7805	7.14823	14.6588	11.0823	10.6864	8.59288	10.3513	10.3063	13.3111	12.8833		8.80436	12.4147	11.6166	11.9491	10.2074	11.0797	15.3657	18.3896	13.0083	15.3091	18.5722	9.3844		12.4766	28.7895	10.3299	11.1551	20.7434	23.6603	9.00435	13.8581	31.3628	13.5322	16.228	10.5648		38.5224	21.9039	22.1049	27.6231	39.0748	33.5762	30.7873	31.0736	22.5069	51.5542	33.6447
147.84	10.1159	4.58492	11.6135	21.0995	5.49998	11.4068	7.54685	6.52641	7.83211	11.4206	12.4079		9.98812	11.5184	11.6313	12.2163	14.9312	10.3791	15.9115	14.7936	19.4943	14.0446	20.7929	10.3052		11.3923	30.8079	10.3945	12.1116	22.43	21.9917	9.98164	11.1999	28.2241	13.4999	14.4724	11.3202		40.9728	24.5334	20.9393	23.4509	44.9057	34.5438	27.1551	30.1401	24.8389	50.2746	37.0442
148.96	7.46364	6.71177	9.20485	16.5379	10.8564	14.586	8.91796	5.38842	6.58809	11.8075	12.8498		11.8968	10.1341	10.2851	11.1244	12.4562	11.5469	19.1797	18.3342	16.2907	15.4173	16.7461	6.74277		11.402	36.9677	11.938	12.539	23.428	24.1777	10.544	12.1413	29.6647	12.3454	16.6978	10.1747		43.1038	24.9436	22.2541	22.9132	44.6815	34.6891	27.5493	31.2484	27.0885	54.8358	36.4301
150.08	9.64357	8.69877	9.2454	14.6802	8.80907	13.1221	7.39103	5.70449	12.225	12.2512	13.2496		10.4137	8.15969	9.28577	15.1308	13.2811	13.5909	16.9106	18.9781	14.2654	13.3824	19.7165	6.03979		13.1847	30.503	11.2405	12.7984	23.1308	18.1031	10.6622	9.63304	27.1001	12.3086	18.6213	13.7105		46.7717	23.5121	21.5665	26.819	41.9478	39.7405	25.8129	36.6771	30.4103	51.2111	39.077
151.2	8.98371	7.6016	10.033	18.346	11.2765	11.7094	8.36256	6.30489	14.1405	12.1054	15.6424		10.5055	11.8439	7.18098	13.6547	13.1562	12.4035	18.6398	17.7084	12.9473	14.9024	20.6407	11.2709		13.5013	31.562	13.2465	13.4907	22.1585	25.8123	9.4492	10.8676	30.5375	11.8487	19.7144	11.8037		43.2999	17.5983	19.3131	26.8213	37.7153	35.1506	27.6687	32.4279	20.4378	47.198	35.4986
152.32	8.9457	6.18897	6.69594	12.9192	6.29273	10.7206	8.38047	7.61644	8.50928	10.907	12.8661		11.7168	12.2333	9.54629	11.1502	14.6166	10.3178	18.2361	9.92173	13.8816	12.4784	14.0422	8.21782		13.4117	31.5722	14.3114	12.2365	22.1824	26.5747	9.36873	10.9692	32.4996	11.6367	20.4829	11.356		43.1116	20.4576	22.7994	27.7169	40.1325	40.1185	31.4285	31.1901	24.8544	47.6277	34.3695
153.44	8.71135	5.35958	8.84072	17.3784	7.47968	13.4031	8.95905	6.29374	12.1545	14.0698	13.5313		8.936	11.5466	11.689	14.2324	11.3536	10.0884	18.3672	14.8973	14.8897	11.7903	16.7018	7.5415		12.9855	29.0842	12.5757	13.1428	22.8026	21.5632	10.7812	12.8271	33.3483	10.9748	18.4844	11.8068		45.3094	20.8018	23.4846	29.0082	39.783	34.1001	26.2411	28.0093	23.9398	44.7073	34.1162
154.56	10.0727	7.9972	12.7623	12.5392	10.6758	14.1606	7.17207	5.46946	11.7033	12.4481	13.7374		11.3804	9.76703	11.1726	16.043	5.52536	11.3601	16.5398	16.5554	12.77	12.3394	13.4125	7.94905		12.184	32.1709	10.7945	13.4016	21.2343	24.5561	9.93691	13.0217	26.4058	12.4769	14.894	8.67621		43.1072	20.6922	21.1806	29.1016	40.7051	34.8905	26.4947	31.7389	28.6803	51.7442	35.8558
155.68	9.206	7.26432	8.98913	16.6945	6.77254	12.7736	6.5071	1.98426	6.53329	14.2054	17.2573		9.7813	7.46123	6.51846	14.8275	10.1342	10.6212	16.1037	17.0097	16.0098	15.3895	12.6042	9.22381		12.5404	31.4311	11.0254	12.4265	25.1096	17.0635	8.6123	9.68262	27.3306	11.4051	17.9094	7.74902		42.9988	20.697	21.4537	26.8509	40.596	33.3889	28.9233	28.3793	24.6329	47.1251	33.1286
156.8	9.32171	6.42374	7.52176	22.2709	8.253	11.5888	7.58785	8.29957	8.96546	14.6973	15.6154		9.98064	3.98238	11.033	15.4466	15.5542	15.966	19.1143	13.8757	8.75696	10.9169	14.9314	7.50575		12.5807	38.7311	11.47	14.3134	24.1989	22.5186	10.465	9.78948	28.8318	11.0553	14.9112	8.62327		45.1714	18.0158	25.5727	27.6743	44.6576	37.47	25.5238	34.2557	24.5942	48.5409	33.1382
157.92	11.2234	5.57558	4.09211	19.9105	5.65753	16.3205	7.7037	5.88819	9.04446	13.3589	13.0963		11.0396	8.45957	10.2681	11.6409	10.1228	9.10736	20.1076	15.1084	18.9772	8.84204	16.2379	10.6907		13.4915	25.8219	10.241	12.9235	23.9169	32.2133	9.14631	12.8767	30.0903	12.4288	14.9914	12.095		38.2716	17.5024	24.1994	27.0278	39.6884	34.7241	29.3318	33.9841	23.7374	43.5654	35.0016
159.04	9.81179	8.88271	8.61942	18.8388	8.50622	13.3688	6.29831	3.18032	15.5919	12.224	15.3609		11.441	11.4046	9.71339	11.339	12.6099	11.841	16.5301	17.7049	13.976	15.6582	17.6724	11.384		13.9226	34.5845	8.99274	13.7926	22.8275	23.2479	9.5622	9.6934	30.1444	10.7029	16.4031	9.8477		42.9601	20.2455	20.9973	25.7182	37.4404	36.714	25.3201	32.0611	24.5095	49.3133	33.3917
160.16	10.2204	6.61769	9.54928	14.8597	7.33437	10.1737	8.9283	3.17762	11.1966	11.9815	16.3159		13.1278	10.082	10.1902	13.2044	9.2338	10.6089	18.452	17.256	13.3701	14.3406	15.7798	10.1374		11.5081	32.9546	12.6645	14.2107	21.52	22.1222	8.19606	11.4912	28.6469	10.9689	15.2367	9.19866		40.9641	18.7867	22.6225	25.9982	41.315	42.3295	31.0397	30.0433	24.532	50.5643	33.4702
161.28	10.3003	7.97442	6.48934	19.4009	4.02241	11.9153	8.57867	6.41902	9.16438	11.6824	13.7318		13.1435	11.9212	10.2326	12.7044	19.4702	9.30443	20.3819	15.6468	15.7934	12.9899	13.261	8.28721		13.3694	30.1213	12.8445	14.7237	23.2042	26.8159	9.23867	12.42	30.3271	11.2888	15.5046	11.0008		44.2072	21.2145	19.0336	24.3198	40.5866	34.7895	25.4953	32.0324	23.2491	50.801	35.8546
162.4	9.34276	6.87408	6.00619	15.7363	6.62507	10.1371	6.51709	7.42092	11.2048	12.3339	13.5652		13.3101	13.9695	10.2336	12.2184	10.9958	11.0784	15.8941	11.3101	11.7378	18.8327	20.0868	10.0322		11.4376	25.8421	8.44257	12.887	21.9535	23.3765	9.43417	12.1789	28.0946	12.4923	21.7512	11.2991		39.3035	24.1218	27.2605	27.942	41.481	33.5265	27.1737	34.4673	19.5854	51.1904	32.7385
163.52	9.88121	6.18538	9.63833	17.6797	8.37097	9.4045	7.08034	8.01794	10.5255	12.485	14.3883		14.5126	10.5923	11.1482	14.1023	8.90902	9.15904	16.3477	13.6673	10.302	10.5707	13.0294	8.38538		12.7919	29.5158	11.665	14.2516	23.9675	35.54	11.2736	13.4159	30.3065	11.3581	18.0293	9.22792		45.5224	20.2382	18.3419	26.6683	35.9366	37.6229	29.2683	29.8156	25.1555	47.6021	32.9124
164.64	9.14101	6.76967	7.88559	16.9434	5.83018	7.46174	7.4614	10.7525	14.4846	13.2544	14.1423		11.6005	11.0421	8.75947	11.9219	11.5164	12.0044	20.2484	18.1981	11.3526	16.3234	18.9453	7.4203		10.6379	21.21	13.8518	14.954	22.3382	19.7906	9.36461	14.5784	31.0974	12.4556	15.3639	8.45148		42.5657	14.7371	25.2047	25.6923	40.9152	33.6334	29.8345	33.174	27.0293	45.2506	34.0079
165.76	9.06664	4.87865	8.08015	13.3641	6.42149	12.5686	9.00573	7.75151	10.7255	12.535	13.3691		9.34658	14.3261	11.3508	13.3065	9.4478	10.7663	19.3255	14.1632	15.0344	9.61982	11.8601	7.9942		12.2156	24.2232	11.4405	12.2015	22.8738	25.5096	10.2653	15.4453	31.8805	11.5909	19.1023	7.18316		31.6791	18.1519	21.6526	24.4007	41.282	32.0593	25.7494	31.3431	27.8192	51.6317	33.8702
166.88	8.8848	6.27683	8.24972	18.7473	13.1907	12.4054	7.80362	5.55591	7.69084	10.9252	12.1764		8.60741	9.41801	10.4211	12.1227	9.51533	13.3638	16.0673	13.0068	12.189	9.9797	15.744	4.52656		13.1265	23.0654	12.423	12.365	22.0861	20.2995	8.89738	12.0957	30.3552	11.1458	12.5923	9.56132		36.8406	16.8569	23.0559	21.6781	36.262	33.1767	26.2849	36.6224	24.8671	47.1578	34.0218
168	8.66939	7.33477	7.65048	14.861	11.3405	13.783	8.4505	6.36195	10.0405	13.449	13.8106		10.73	12.7557	8.21844	17.0682	7.50479	12.9867	17.648	12.5779	11.342	15.5792	13.379	7.41212		12.7275	29.433	16.0686	15.3108	22.2427	24.4927	9.46074	13.4051	30.8472	10.2527	16.4344	11.7749		40.7489	17.3224	22.8666	28.2011	38.3439	33.568	27.9414	34.1712	25.9746	48.0375	34.7047
169.12	8.91104	5.21414	7.77862	16.0332	4.18642	12.0124	6.22802	10.6194	7.91289	13	13.4786		11.5586	15.8742	7.64512	12.1203	14.2577	8.14303	17.2947	12.9891	13.0062	13.4268	11.2726	7.53878		11.6283	26.5329	14.0295	12.3525	23.23	23.2375	9.07118	11.6486	29.2862	9.95659	21.6514	12.5561		43.8735	18.7126	25.312	27.3158	44.6669	31.8213	23.0256	30.1825	24.3478	49.8412	34.7513
170.24	9.48334	5.92383	9.06936	16.4936	7.40487	14.0058	8.17573	9.50138	9.26153	12.8415	11.9352		14.3405	12.0623	9.14854	12.5892	8.72994	14.2808	19.0574	17.5519	16.2403	10.5263	12.7285	9.5553		12.2111	26.2103	12.8587	13.6608	20.5387	23.1902	11.173	13.504	32.2182	11.5523	16.891	12.1563		40.3497	14.3443	18.6339	27.6563	39.7181	37.5606	26.2806	35.0149	24.3919	51.7596	33.4136
171.36	10.5001	5.63305	9.23659	18.6424	8.11992	11.4406	5.99158	10.4327	6.534	11.9857	11.3922		12.1339	15.2825	9.53419	13.1339	12.5325	12.3498	15.2616	14.1401	13.5673	17.443	13.9286	10.5274		11.8273	29.8569	8.16595	12.2094	22.0724	29.0189	9.34361	11.3964	29.4362	11.0745	17.441	11.5538		34.4206	16.0012	24.384	25.9384	37.1719	36.9805	29.5727	33.3289	23.9415	53.6142	32.8656
172.48	8.25212	4.84026	6.79645	15.1693	12.2318	11.8247	7.23616	7.05657	7.66593	14.1598	12.2003		10.1698	8.52131	8.89286	11.21	14.2091	9.96565	15.92	9.51982	9.02298	8.9464	19.0811	6.84792		12.9839	29.3266	11.3678	13.77	22.6212	25.398	8.9124	13.3158	27.3415	12.6407	20.2539	12.4049		39.6984	19.5082	23.6725	31.373	40.5647	30.6394	33.4076	30.927	24.6934	50.427	31.8641
173.6	9.022	5.92689	12.6001	13.4485	7.59262	17.0072	6.47635	8.32388	9.52592	12.5964	10.9348		12.9856	13.0422	9.82357	11.6981	13.3471	11.079	18.1794	9.65623	18.6125	10.8823	10.5007	8.45447		12.4729	23.8905	14.531	11.9386	21.7272	25.5446	7.8329	10.01	28.2906	11.7314	16.9805	11.779		38.8674	18.1807	22.5023	27.5426	37.7136	32.1158	30.209	31.4221	24.3717	46.9595	33.1755
174.72	7.82571	7.23721	8.31143	14.6859	4.92162	18.6633	8.07564	9.91774	10.1654	11.3732	12.6914		11.1025	8.47679	7.30367	13.8155	9.95546	10.7082	15.0391	17.2864	11.0873	12.3399	18.588	9.92558		12.5206	26.1436	11.8723	12.7385	25.7942	27.7135	8.95568	10.6459	27.4271	11.6727	20.3464	12.6447		47.8361	17.2103	20.1329	29.8093	39.5102	34.3175	29.7156	31.2549	28.7886	47.8034	35.302
175.84	9.38821	5.55058	7.0198	14.6203	13.3921	16.8904	7.60723	6.99679	11.9698	12.5942	12.3894		12.0162	8.16557	10.5428	15.7553	13.2648	8.97998	14.9577	11.8935	12.8948	11.8556	11.3148	8.49295		12.1003	28.3258	15.297	13.1918	21.4992	27.7476	8.95359	13.0768	33.5939	12.3743	19.3374	11.0983		39.77	14.8113	19.3048	31.1638	40.145	29.8321	30.801	30.4362	25.0416	54.5506	33.2837
176.96	9.37229	4.77761	9.24687	14.4083	11.4966	20.9138	7.91292	8.45254	11.4467	13.016	13.5983		11.908	12.9187	9.24157	15.2382	11.0653	10.4181	17.6292	17.5199	11.9116	17.1133	17.3458	7.18971		11.3112	16.506	13.3835	13.0718	23.8832	24.5797	10.6698	8.76246	28.4558	11.6319	17.1454	12.0942		39.95	17.173	22.5364	26.2779	43.8716	32.6704	26.0686	33.1247	24.0137	49.235	34.4759
178.08	9.69693	6.91195	8.18888	13.9627	6.59126	12.8416	8.87257	5.38471	12.2154	12.2185	13.2935		13.7367	14.8998	8.41055	13.449	12.745	9.3181	18.315	14.9081	12.7033	14.761	11.8301	8.18479		13.8166	24.0281	12.3166	12.9893	22.4776	28.5885	10.3235	12.5204	31.1707	12.461	17.5679	11.1177		41.8996	15.345	20.4612	29.4658	38.0294	31.4117	30.2271	36.1221	26.9352	45.7153	35.8662
179.2	9.92435	5.35694	7.96288	14.7384	6.72147	12.957	9.12047	12.7377	11.3368	12.6644	10.8177		13.3802	14.0804	10.6665	12.9736	11.7975	9.87729	15.6963	12.2881	11.1058	12.3204	17.1706	10.5019		12.2032	31.6456	12.1082	14.2335	24.1185	27.1592	9.41804	11.7813	28.4771	12.5339	18.0993	11.3144		40.7688	15.0341	20.9637	28.3916	42.6994	40.3587	29.1089	37.6963	23.237	50.5839	34.3408
180.32	9.28653	4.93856	8.05898	14.1996	8.03503	13.3834	9.60179	5.50593	9.30138	12.7361	13.6034		11.8563	12.8843	8.27333	13.6521	14.3305	14.4635	14.9737	16.3566	16.5305	11.8327	14.9735	7.3097		10.9204	23.616	12.4459	12.3963	22.1293	24.0027	9.59057	12.1656	29.0428	13.4254	18.6396	10.4014		37.8802	17.7979	22.3001	28.3737	39.4578	31.1777	24.2232	33.111	25.9195	53.7402	35.3842
181.44	8.78736	2.97497	10.5691	14.5137	3.49439	14.4476	9.04165	6.75333	15.972	13.7568	13.9264		9.78607	9.96947	8.85088	10.2608	10.6077	11.6576	14.5691	15.5543	21.548	10.4025	17.7381	9.53985		12.1829	20.3241	13.0484	15.2831	23.924	20.5927	10.2705	11.9519	31.5224	12.8955	19.4287	11.8351		44.5058	19.0977	26.4058	28.0983	41.0927	33.6361	29.7211	38.0892	26.6637	49.9469	34.6867
182.56	7.873	6.44441	8.60209	11.8991	6.29776	17.1441	7.83497	10.1011	7.31934	13.5963	13.3791		9.56156	12.4416	10.6205	12.1897	15.3652	16.3889	18.9459	18.6201	13.6035	13.8335	13.271	7.68543		12.2922	27.1655	12.6637	15.8419	24.0152	24.8493	9.58042	9.42733	32.9707	13.0609	17.5869	12.8257		44.0254	15.553	26.2252	26.9094	39.0446	34.1139	28.6779	39.3046	24.171	47.4106	34.4865
183.68	7.8186	5.69243	7.00217	14.995	13.8043	22.237	8.14325	8.05745	13.8469	13.1016	13.4539		9.37583	11.0039	8.03157	13.3839	12.4403	11.1507	16.3914	15.2333	8.39233	14.9682	14.9085	8.25418		13.3693	25.5094	13.6966	15.0263	24.8534	23.6717	9.29245	11.0995	32.9843	10.3586	18.7777	11.8842		46.6298	16.3999	22.681	28.8515	40.0368	33.6788	23.663	36.602	22.1722	52.4768	35.3196
184.8	8.06844	5.07777	10.5212	15.3345	9.29752	16.3435	8.93407	9.86371	11.2051	14.1844	12.9971		10.3657	11.0102	9.19718	12.9254	12.5993	6.81957	17.6849	12.2392	11.9237	13.0772	11.9902	4.90381		12.9419	24.8084	12.4835	17.7147	22.7804	30.9722	10.8729	12.9527	29.9516	10.7546	19.6734	10.3034		47.2954	18.0099	23.9088	29.7335	38.8114	32.4932	28.9331	30.9838	25.1945	50.6926	34.7095
185.92	7.55731	4.97114	9.49315	15.0934	7.42573	19.6131	8.65258	7.4216	11.8318	12.9105	10.9472		11.4073	11.8964	9.61531	13.3657	11.8082	9.56351	16.4476	19.8035	11.6477	17.559	16.8033	8.81838		11.9043	27.9855	10.5549	12.863	24.9136	29.7397	6.6054	14.4765	28.7926	11.7453	12.4932	9.85148		44.5852	20.2323	20.1849	26.5852	39.4037	33.8913	27.7925	33.0041	26.7557	48.928	32.8041
187.04	7.95141	3.9015	9.51578	14.385	8.67023	16.4865	7.87063	8.73079	10.5724	13.589	13.5007		14.3919	13.2627	10.8911	14.0662	10.6839	11.6896	15.9783	12.7582	13.1587	6.29073	10.0111	6.83064		12.1883	22.1693	13.0799	14.9401	21.2643	24.0037	10.8924	12.1281	29.7809	11.4248	16.0565	9.73393		41.4353	18.7926	24.7456	28.217	38.4058	28.3412	26.5834	32.2072	24.8486	49.0262	32.4684
188.16	8.63185	4.45203	8.21739	14.8593	9.60037	18.3824	8.71287	10.3148	11.3959	13.2039	11.6693		10.4157	5.06598	10.9563	13.2028	10.5845	9.85495	17.069	17.138	11.5059	10.7594	13.5705	8.76263		13.9674	28.1958	16.7559	13.603	23.888	25.8577	10.0455	12.0391	28.1171	12.7893	18.0911	9.1232		43.9412	20.0821	23.6113	27.6806	40.5342	34.9403	33.4486	33.2341	24.2383	54.9638	34.8423
189.28	7.42097	7.13596	2.27766	13.4289	7.38257	10.1493	8.48082	7.65561	15.3695	13.164	14.4134		11.8679	7.31045	10.4108	10.7039	10.6612	12.9673	14.2024	19.2443	13.3283	12.0507	14.4854	6.57521		13.5941	22.6389	13.9961	14.2817	22.0967	28.3492	10.2131	13.8855	28.5982	11.6418	21.9712	10.4724		45.7758	17.6193	24.9307	27.7145	41.2959	30.2875	23.6088	33.1358	25.4466	53.5092	34.812
190.4	7.12092	6.06832	8.58974	16.4624	7.33797	16.8932	7.44926	4.96497	14.7924	14.266	12.7195		14.9079	11.0837	9.55275	12.4627	14.7969	10.3528	19.3057	16.9122	21.1231	13.6843	7.42446	4.10629		11.622	30.5959	10.7279	15.5869	23.5872	23.2403	11.8045	12.5752	29.9205	11.3903	11.7406	11.1877		46.4515	15.1001	22.4484	27.0484	37.4933	33.6797	25.4236	34.4875	23.114	55.2192	35.3868
191.52	7.0629	3.32765	7.48414	12.0836	4.83817	16.1498	8.44645	6.4305	10.4219	14.124	13.6524		15.7664	8.79221	9.91761	12.62	12.4524	9.78425	17.375	13.8638	6.94517	14.957	16.085	11.7367		12.9429	28.162	12.1261	14.3249	21.6077	26.4886	10.2451	8.26728	29.7981	10.6017	20.1656	11.9485		46.6589	21.3698	22.4733	28.5416	41.0325	33.3257	31.0797	27.4855	26.3124	53.0133	36.4853
192.64	7.22209	4.48747	8.56946	9.95903	12.88	16.1831	8.10242	7.93623	13.3391	16.266	13.2525		11.1066	7.54775	10.8915	14.6803	10.7693	12.887	17.2497	18.4336	13.5815	12.8953	16.4788	6.48915		13.5115	26.0794	16.1341	15.8852	25.0741	31.6845	9.57387	8.91182	29.1823	11.3033	18.1903	9.35155		45.624	14.5586	23.2755	31.2858	39.1556	35.0809	31.037	37.9421	26.9786	57.6991	32.394
193.76	9.98284	5.53254	6.88226	15.6945	4.39504	18.4119	6.32088	7.66811	10.5742	16.4029	14.2138		20.2831	9.74351	11.0253	14.6432	11.5308	8.53249	14.8208	14.4245	10.4255	16.0942	16.8076	6.65157		11.7012	19.8976	8.85067	12.6344	24.5643	22.4429	9.23548	8.80342	27.5412	11.6539	18.8175	9.44624		45.5788	16.3202	21.2589	26.1961	39.8908	34.2831	26.7132	35.6288	28.2276	56.5323	35.2406
194.88	8.23757	4.98243	8.45544	13.4662	10.4485	17.4785	10.0306	9.08198	7.20192	15.7245	13.5579		9.62925	7.64519	11.9907	14.9133	12.8504	12.8923	14.3359	17.2783	10.324	12.1326	13.251	2.41974		13.7564	31.1761	14.9457	12.2189	24.1925	27.3806	12.0909	9.98657	25.7223	10.8371	19.8594	10.5913		37.1842	16.065	24.6516	27.5832	39.3722	34.5632	33.5023	34.0352	26.8415	52.4557	33.8398
196	8.29465	4.72098	8.74815	15.1049	10.396	18.1099	10.1489	9.66887	9.88603	15.1993	13.6011		10.1864	11.0942	7.9115	16.6837	10.4073	9.13937	14.9013	14.3613	8.75412	11.2198	17.6317	9.43046		12.6593	27.1621	13.2752	16.433	23.7371	25.4027	9.35411	8.59371	28.446	10.9542	21.0236	12.5208		39.553	13.9083	20.0062	25.5796	39.2357	33.8056	33.4634	38.0975	26.3571	57.0064	36.1678
197.12	9.99165	6.90699	8.24237	18.6694	9.13063	18.6905	7.71068	10.1497	8.68293	15.6914	11.0237		11.6889	9.39533	10.2488	11.6038	8.98149	7.76456	11.606	17.4251	9.85652	9.91241	11.214	6.74823		12.854	20.3275	10.0822	14.2264	23.1953	28.8515	9.13007	14.159	28.318	11.0951	18.2367	9.89718		47.4981	18.0933	26.9925	27.7066	44.715	33.275	30.2972	36.301	19.8355	52.5283	36.9184
198.24	7.2471	7.26547	6.62541	12.5105	7.4171	18.0301	7.72248	5.67038	11.5574	14.9558	10.7578		13.1057	11.5718	13.0992	14.5401	8.81037	7.60617	14.6224	11.3818	14.691	9.6798	17.9469	8.84989		12.6235	18.4357	12.3556	13.0779	23.6857	31.9758	10.2592	12.2445	30.1852	12.0453	14.1216	10.9567		40.8947	14.9868	26.0304	28.7215	37.1738	35.4964	27.8368	32.4411	22.9933	49.6756	33.035
199.36	8.9668	5.82395	9.53429	16.298	7.05741	19.3406	7.96073	4.59149	9.34372	16.8753	13.9738		12.0832	12.2669	10.1793	15.7151	13.0284	4.60348	13.876	17.869	16.7816	11.4533	17.3515	10.9237		10.9539	30.3476	13.5649	14.4273	25.7841	28.8401	10.6361	12.6463	30.9898	12.7206	18.7403	14.6867		42.3379	18.1306	25.0914	30.1754	38.4073	28.815	29.9079	31.1963	27.4865	55.2787	33.1284
[truncated: 34 more columns]

## Sheet: Panel c (Barplot)
0 sec + 10μM GLP1	100 sec GLPLight-ctr	10 sec	20 sec	50 sec	100 sec	100 sec + 10μM Exendin-9
94.2032	2.42185	9.40037	9.20555	13.7743	36.7461	2.96907
88.9548	3.93824	9.51417	9.48381	30.962	33.1094	7.04627
91.2389	0.861672	10.1063	9.61545	9.49742	21.668	6.67841
76.8402	0.853348	16.9579	8.05936	9.10025	23.0306	9.02766
94.4244	2.4465	9.46825	14.0891	22.2945	41.6899	7.17419
102.709	2.47449	6.88154	13.1951	32.5147	35.6411	6.65012
87.5522	3.00436	5.5629	19.2133	9.0932	25.8048	4.48176
75.9102	0.485327	4.87962	19.5906	14.1749	26.5197	3.92522
109.341	1.35515	12.4717	21.0735	28.5444	21.0503	1.66631
159.786	2.2001	9.27119	17.6653	12.1745	46.466	1.01607
119.796	2.23574	13.4317	14.3298	17.838	32.8018	5.57778
82.0077	1.96053		9.24834	8.49575	14.6711	10.2554
114.036	-1.08083				26.5332	5.44529
102.851						2.835
95.3725						2.58035
130.329						5.33923
97.0394						5.96833
82.938
96.6078

## Sheet: Panel d (kinetics)
Time (sec)	GLP-1																			Pre incubation 10 uM Photo GLP1
0	1.56376	0.962711	-0.400939	-0.235839	-2.38317	-0.653521	-0.0348589	-0.0948909	-1.23278	-0.485793	-0.114579	-0.478377	-0.460674	-0.125588	0.250023	-0.845452	0.307627	-0.13338		-1.17877	-0.618753	-1.21757	-1.07353	-0.229203	-2.02907	-1.57468	-0.758635	-1.5293	-0.455427	-2.02401	0.496847	-1.13719	-0.221418	-0.620048	-1.05463	0.0779667
2.53	1.30859	0.828373	-0.291759	-0.202778	-0.74653	0.0681462	0.0223799	0.626365	-1.18813	-0.534678	-0.491581	-2.36747	-0.936326	-0.766842	0.455737	-0.385471	0.339951	-0.933145		-1.31002	0.13159	-0.594559	0.45274	-1.07421	-0.9081	-0.130215	-0.896109	-1.34854	-0.232998	-0.680618	-0.337404	-0.715563	-1.06035	-1.32758	-0.616277	-0.268568
5.06	0.151707	0.968698	-0.627349	-0.138511	-1.71293	-1.10495	-0.120505	1.0568	0.431782	-0.84273	1.23737	-0.622002	-0.635045	0.0722651	-0.192345	-0.058745	0.184444	-0.410978		0.430079	-1.01781	-0.153351	0.44927	-0.663113	-0.504865	-0.623795	-1.39206	-1.01306	-0.334772	-1.31577	-0.250651	-0.587361	-0.0812825	-0.627047	-0.663992	-0.296454
7.59	0.677538	0.551381	-0.184372	-0.166117	-0.467536	-0.0851511	0.073197	0.440909	-1.29853	-0.55828	0.246331	-0.596182	-0.132393	0.137951	0.155729	-0.140018	-0.127218	-0.20216		-1.37729	-0.396619	-0.634262	0.429223	-0.467396	-1.03791	-0.980684	-0.408725	-0.84271	0.0371409	-1.04245	-0.390397	-0.685262	-0.678282	0.733524	-0.622911	-0.33511
10.12	0.589259	0.521779	0.0217677	0.125258	0.254915	-0.140068	-0.0219252	-0.555755	-0.506949	-0.423539	-0.100607	-0.736861	0.307062	-0.546153	0.39428	-0.265442	0.912573	0.765665		-0.312098	-0.683343	-0.34818	-1.48604	-0.965701	-0.680641	0.375901	0.325953	-1.09811	0.141336	-0.844919	1.07787	-0.38503	-0.742548	-0.00664115	-0.550712	-0.0961852
12.65	-1.87882	0.28924	-0.269576	-0.51362	-0.561296	-0.432854	-0.717164	0.175611	0.847967	-0.347922	0.464308	-0.794442	0.02099	0.635984	-0.0244925	0.266852	0.419669	0.37199		-0.226711	-0.742694	-0.262928	-1.51919	-0.990475	-1.73141	0.504997	-0.736744	-0.94279	-0.271993	-0.39159	0.0617837	-0.583559	-0.154146	-0.0969259	-0.391494	-0.389035
15.18	-3.45472	0.101891	-0.117489	-0.286771	-1.81106	0.417364	-0.338534	-0.285453	-0.0688471	-0.799503	0.475834	-0.632188	-0.0039423	0.229002	0.241136	-0.215279	0.0547858	0.030099		0.499741	-0.186923	0.155172	0.437319	-0.489736	-0.811837	0.213381	0.00702017	-1.01061	-0.0682618	-0.28976	-1.32137	-0.389094	-0.190579	-0.689708	-1.05516	-0.0329385
17.71	-0.789308	0.337595	-0.0127059	-0.100607	-0.954963	-0.13983	-0.460807	0.574276	0.705682	-0.12227	-0.358999	1.33611	-0.025792	0.379235	0.0712827	-0.158265	-0.39355	0.205763		0.254162	0.203592	-0.211063	-1.72005	-0.270697	-0.596089	1.25252	-0.102	-0.786109	0.083828	-0.283395	0.186112	0.0103002	0.632538	-0.191428	-0.427577	-0.213599
20.24	-0.162229	0.336082	0.179895	-0.188482	0.862622	0.00285172	-0.19831	0.0518565	-0.451805	-0.325244	-0.0245764	-0.865353	-0.570007	0.732668	-0.396913	0.0449603	-0.438288	-0.413422		-0.503683	0.120161	-0.571647	-1.05618	0.286663	-0.767498	0.848145	0.0952682	-0.232531	-0.346111	-0.574559	-0.922179	0.228278	0.125235	0.0137055	0.197457	-0.316707
22.77	1.49176	-0.113987	0.267542	0.0770385	0.949873	0.250298	0.541024	-0.323067	0.568792	0.263867	-0.0823051	1.19558	-0.13617	0.499912	-0.505915	0.414957	0.527836	-0.223342		0.195804	0.160344	-0.199254	-0.650712	-0.411197	-0.0572916	-0.366305	0.575767	-0.654667	0.00411888	0.00102254	-0.0178788	0.0479665	-0.196485	0.690839	-0.748288	0.795869
25.3	2.1191	0.120237	0.388785	-0.0102784	0.111574	-0.644741	0.0278642	0.272847	-0.304131	0.58627	0.0299069	0.494836	0.292734	-0.252552	-0.133933	0.603252	-0.272177	0.43028		-0.21804	-0.203026	-0.324679	0.02462	-0.368298	-1.06022	-0.270892	0.7098	-0.00951117	0.220613	0.701223	0.525687	0.21926	-0.461309	-0.888306	0.184723	-0.386143
27.83	0.665229	-0.469564	-0.253213	-0.118217	0.290783	0.355025	-0.0551914	-0.514024	0.867424	0.288551	-0.0905383	-0.847077	0.688555	-0.240918	-0.0621698	-0.00495118	-0.77939	0.715728		0.871069	-0.0424159	0.188069	0.454572	-0.502054	-0.104176	-0.660515	0.349286	0.190563	0.215873	-0.48019	-0.383478	0.432859	0.423852	0.341982	0.230764	0.3365
30.36	-1.38952	-0.329492	0.241357	-0.0524241	-0.506175	1.0804	0.798011	0.81856	-0.311574	1.10887	-0.308892	-0.364366	0.539562	0.682736	0.937786	0.0605524	-0.913686	0.415695		0.357249	0.231304	0.854508	1.52853	-0.087065	0.6783	0.0348397	-0.0153523	0.363348	-0.276122	0.360108	-0.101938	0.254517	-0.369812	0.655012	0.521683	0.352093
32.89	-2.28117	-0.035041	0.0456564	0.363405	1.57288	-0.210672	0.0584924	0.335939	0.839586	0.262844	-0.384781	-0.173449	0.361894	-0.536904	-0.229957	0.0338451	0.456715	0.240734		-0.151189	-0.13939	0.698147	0.300941	0.690177	0.4256	0.44219	-0.00694798	0.827166	0.0445807	0.257155	-0.500658	0.567718	0.459472	0.0599132	0.533658	-0.653518
35.42	-0.0432447	-0.969083	0.154262	0.315916	1.13275	-0.087905	-0.567253	-0.15377	0.194447	0.502484	0.484022	0.603155	-0.124077	0.34296	0.157334	0.190651	-0.902122	-0.0476765		0.261877	1.13663	0.508696	0.421125	0.32207	0.967758	0.464098	-0.0206755	0.457623	-0.292933	0.539967	0.210556	0.403012	-0.0653674	-0.0401036	0.369064	0.0425256
37.95	-0.577679	-0.560381	0.690561	0.385013	0.419791	0.0971602	0.108144	-1.1038	0.623054	-0.20385	-0.350577	0.544276	-0.0207718	0.202698	0.117929	0.42458	0.42408	-0.0570534		0.0918794	0.157129	-0.302493	1.07815	0.439995	0.791068	-0.702554	0.586173	1.2622	0.0280929	0.955412	0.641632	-0.176676	0.656345	-0.0579487	0.323987	0.675159
40.48	1.63285	-0.383869	0.253203	-0.202725	1.88581	0.291686	0.275843	1.06076	0.562578	0.204105	-0.496098	1.27379	0.41671	-0.273147	0.666273	-0.200596	-0.0665043	0.0448509		0.0567789	-0.134003	0.937603	0.698991	0.465893	0.923034	0.000906283	0.129166	2.0586	-0.189373	1.62458	0.174097	0.540011	0.444053	1.14921	0.788425	-0.24261
43.01	0.133707	-0.780061	-0.267565	0.710007	0.878895	0.349596	-0.341943	0.131354	0.109007	0.387009	-0.235025	1.06564	0.465944	0.162303	-0.324544	-0.00717958	0.480922	-0.0334607		0.875195	1.01102	0.342231	-0.618523	1.05843	2.2885	0.440038	0.977627	1.29705	0.46836	1.78806	-0.0301877	0.882086	0.260272	-0.258677	1.32146	0.557746
45.54	0.471071	-0.502557	-0.0347696	0.547132	0.390638	0.229106	-0.239253	-1.12868	0.749459	-0.300718	-0.383135	0.954427	0.259916	-0.562266	-0.326715	0.116624	0.233338	-0.460259		0.294345	0.76996	0.477779	0.580153	1.51917	1.48731	0.254596	0.35841	1.65917	0.552088	0.749295	0.345142	0.325262	0.841825	0.826034	0.894621	0.361897
48.07	-0.227874	-0.873953	0.216708	-0.3074	0.39313	0.358058	1.19079	-1.38585	-1.13703	1.34052	0.483927	1.00996	-0.308171	-0.773344	-1.25052	0.125125	-0.449005	-0.305928		1.08962	0.243239	0.657778	1.2686	1.73676	2.72753	0.478026	0.222777	1.35222	0.671961	0.950445	0.536414	0.748467	0.377983	0.334195	0.765197	0.0311138
50.6	2.60417	-1.10191	-0.29344	0.602805	1.22817	1.49867	1.3051	-0.615574	0.621239	0.934517	0.395616	0.174926	-0.0313242	-0.649849	-1.54319	0.061064	-0.82803	-0.398074		0.94133	1.49527	-0.135187	0.334385	1.81206	4.96867	-0.0576576	0.244229	2.02442	-0.035283	0.468238	-1.45091	0.94853	0.955485	0.754982	1.1432	-1.29933
53.13	0.405026	-1.44973	-0.325582	-0.09141	0.560083	2.50482	1.28899	-1.25456	0.277426	1.67436	-1.0516	-0.711542	47.8339	26.691	13.1956	40.0536	27.2835	46.2593		0.610123	1.22816	0.00865901	1.1221	2.49157	4.90542	0.131645	0.268842	1.52679	0.194109	-0.0281942	-0.312082	0.488047	0.972342	-0.626118	-0.279198	0.220133
55.66	5.5691	7.86771	18.4255	16.2186	7.81698	22.5201	13.3369	17.7132	20.3063	19.5903	7.40385	8.56525	70.9593	86.9791	51.6042	67.354	69.3014	69.2976		2.695	0.759156	-0.371681	2.4584	2.08267	7.09122	7.0809	4.46924	6.09668	3.28955	9.5275	6.31017	6.80449	6.03622	4.05695	7.66833	2.76538
58.19	49.5644	47.2237	54.2915	65.1501	54.0314	62.8263	46.6937	48.3602	57.6523	47.8912	33.3636	28.977	79.642	102.769	64.6341	76.368	84.9714	77.2549		0.400421	1.27111	1.37175	1.83483	1.71858	11.7995	13.8737	12.2887	13.1748	8.76996	18.5209	16.6667	13.1015	19.0621	10.8096	14.6341	8.00929
60.72	71.345	71.3314	73.5318	89.5293	76.3482	86.9985	75.6155	62.1744	84.9753	63.3806	59.2535	49.2025	82.3627	108.99	71.2755	79.4898	90.0665	80.1699		3.4553	6.09288	4.48456	7.85712	4.30443	25.4186	29.3608	25.1737	27.6306	18.7796	24.4464	22.0638	18.0739	28.2352	14.7273	20.0102	13.1391
63.25	84.0668	84.1082	83.0788	99.586	90.8035	99.5712	88.5976	68.0215	98.0759	69.3609	70.0855	56.0046	83.833	109.889	72.095	81.2428	92.3637	82.3016		10.0836	12.3196	11.253	14.7763	8.01099	28.6553	37.7136	36.9398	37.8741	27.1023	32.1869	28.3991	21.4583	33.7053	19.598	21.8638	18.7344
65.78	91.3302	89.0721	89.102	103.931	98.8598	103.723	91.8356	69.7776	104.581	73.2068	76.2936	60.1669	83.5066	112.811	74.5124	81.7699	96.8929	81.2615		13.422	16.4637	15.1957	19.9775	12.5559	36.7188	46.4336	41.2563	42.9478	31.8022	35.2315	30.7851	23.752	36.2078	21.5195	25.8908	21.6375
68.31	99.5225	91.847	90.5292	106.033	101.737	107.623	95.4338	70.7144	102.486	73.0722	79.2734	62.6138	85.784	116.232	75.5009	82.7307	95.5748	82.9883		15.7494	20.1829	19.7299	23.6942	17.7183	39.4606	47.7396	46.8701	47.8443	34.4392	39.3646	31.3488	26.0286	39.7774	23.6451	27.1273	24.7784
70.84	107.871	92.5623	92.6496	107.216	99.5627	108.946	96.7412	74.9301	102.778	75.2308	79.765	63.1716	85.7542	116.787	75.2473	83.3074	96.2676	83.6501		19.5011	22.7211	23.6602	28.3163	21.533	45.3458	52.1347	49.9814	51.6308	37.4902	43.4767	37.0676	28.4664	41.781	26.0173	29.6184	25.2668
73.37	108.247	93.5005	93.2365	104.416	101.286	110.259	96.3336	73.8492	109.725	74.2542	78.2365	62.751	85.9566	111.785	75.1748	82.7067	98.2463	83.9021		22.8838	25.9247	27.6884	30.9875	24.582	47.7612	53.4981	52.8361	54.615	39.4918	47.803	39.2814	31.2266	46.1056	29.2596	31.07	29.6644
75.9	102.026	92.9924	92.437	103.592	102.677	114.669	96.068	75.7313	111.23	74.6549	79.6699	63.5864	85.4472	117.125	76.8617	83.3263	98.5131	83.3693		24.7752	27.6372	28.9747	33.1025	26.5349	50.0174	55.6392	54.2794	56.5087	40.4955	48.4494	40.6702	33.2588	47.5476	29.101	32.5324	30.1283
78.43	103.806	93.4466	93.3681	104.065	103.925	110.026	98.0148	77.2111	109.757	77.6077	80.7187	65.045	85.2762	117.684	76.102	82.3604	99.0532	84.0893		24.8359	29.1246	30.4327	35.2287	28.2511	51.2543	58.1908	56.1384	59.8523	42.8435	52.4244	40.5783	34.5692	50.0658	31.1285	34.576	32.2919
80.96	111.192	94.4422	93.7157	104.89	103.997	111.748	97.9121	77.2255	107.725	75.3839	82.3487	64.7485	87.4369	120.222	76.6753	84.4665	100.258	84.8688		27.8189	32.3127	33.2857	36.1921	29.9388	55.3679	58.0017	59.3649	61.7829	43.8731	54.3588	43.8811	36.7307	51.3771	32.9097	36.398	33.79
83.49	106.396	93.7871	94.3287	105.075	102.707	112.78	100.228	78.8781	110.813	76.8582	82.7031	63.7754	86.769	120.427	76.2296	85.525	100.158	83.9985		30.8912	33.932	35.4046	42.978	31.9881	55.7506	62.5455	61.3593	63.8366	45.1769	56.5885	45.6578	38.8491	53.4478	34.7419	38.5312	35.0837
86.02	109.315	95.5563	93.6171	106.256	103.494	113.759	99.9325	75.7967	112.735	79.5388	82.766	65.0464	86.0779	118.431	77.2889	84.2143	98.0239	82.8358		33.2918	35.083	36.3189	41.9018	35.3473	62.6241	64.6918	61.0496	65.8254	46.2818	58.5587	47.3832	40.0904	56.2644	35.9607	39.7229	38.4073
88.55	112.976	95.543	94.9577	105.21	104.332	113.884	98.5336	77.4314	111.685	77.5225	81.7943	65.2358	86.538	121.533	76.3449	84.1965	101.463	84.8743		34.7126	38.4525	38.0836	46.02	37.3482	62.8508	63.3888	64.5943	67.6012	47.0865	61.7332	48.2393	41.7295	57.4886	37.5301	40.2302	38.0973
91.08	110.93	95.2609	95.1333	106.551	105.634	114.897	100.005	80.1198	106.895	77.512	82.6379	64.9317	86.5614	122.065	75.7309	84.2865	100.667	84.0831		36.1019	39.2859	41.0842	48.1694	39.5144	62.4773	64.5956	64.6227	69.4542	48.6196	63.0449	49.8034	43.194	59.0791	39.3783	42.4687	38.7853
93.61	112.938	96.4588	97.09	107.934	104.811	113.361	102.123	77.9407	109.526	78.0436	82.0592	67.1536	87.5671	122.066	75.9177	84.6094	100.508	85.6346		38.6633	41.1447	41.0652	49.8128	41.8271	68.8284	64.8163	66.7667	71.3676	48.9033	64.9287	51.0615	45.5705	60.96	38.8976	44.3741	42.9594
96.14	111.749	98.4176	98.2463	112.991	110.812	114.018	101.509	81.8725	111.611	79.3579	83.9144	67.7618	87.8783	124.846	76.4444	84.6527	101.347	85.0801		41.9891	42.4719	43.5297	51.4276	42.517	67.8509	66.3116	67.2022	72.3248	49.7844	67.0759	53.3834	46.7438	64.4735	41.7835	44.7806	42.4472
98.67	113.532	101.463	99.2037	115.877	115.967	114.874	103.243	79.4561	110.071	79.6379	82.9888	64.937	88.0719	119.666	74.9331	83.7782	100.711	84.8762		42.5346	45.2762	46.8099	54.1284	45.4099	68.4346	69.334	68.9332	73.371	50.8706	69.4681	54.2124	47.4346	65.1298	40.6086	45.5723	42.2326
101.2	116.194	101.969	98.6163	116.514	118.762	116.296	101.369	79.6339	112.758	81.4871	82.9712	64.9154	88.118	124.888	74.6284	84.3717	99.2017	85.2726		41.2679	44.6518	47.8619	55.4842	45.8203	70.4736	70.5038	70.2819	74.9117	51.7266	71.1774	56.9298	49.0304	66.12	44.18	47.5688	46.1123
103.73	117.899	103.765	98.491	116.342	116.866	117.78	100.99	82.0303	113.868	81.4612	83.9075	68.6087	88.1653	123.235	74.9865	84.4811	101	85.3016		42.9329	45.6373	49.2747	56.5188	47.3981	74.1907	70.8432	71.9421	77.6344	52.3091	73.2905	56.9717	51.0066	67.6577	43.5836	48.9414	46.694
106.26	118.551	102.053	99.5234	117.597	117.596	118.673	101.629	80.2742	110.728	82.5767	82.6801	66.6722	87.7789	122.529	74.2337	84.5072	101.893	85.2288		46.1729	49.091	51.8387	61.0359	50.893	76.4505	74.3913	72.3707	77.2142	53.3819	74.7896	57.6792	51.3392	67.802	44.7421	49.1546	48.6604
108.79	120.303	100.845	100.15	117.924	116.759	117.581	103.549	82.6281	112.888	83.6996	83.1616	67.2011	88.1504	123.653	74.9941	84.6531	101.605	84.967		47.9078	48.759	50.7228	61.4859	50.1242	76.2042	69.9872	73.075	77.8837	54.2262	76.6524	60.5073	52.9095	70.0816	47.8917	50.8666	47.1257
111.32	120.173	102.56	99.3576	118.165	118.495	117.286	102.776	83.7707	113.165	81.8796	84.0611	68.9123	88.6843	127.519	73.552	84.4752	100.317	85.174		47.5692	50.849	53.2039	59.3408	54.2239	79.0322	72.625	75.0343	80.2187	55.148	78.3245	61.2675	53.9322	69.9795	48.0245	51.5042	49.7831
113.85	115.365	102.855	99.7812	117.836	117.068	118.645	101.377	81.7389	111.847	82.2762	84.6799	66.8995	89.4593	125.417	73.9334	85.026	103.41	85.6334		51.7979	50.1106	55.3734	64.3452	56.2638	83.9824	73.9799	75.9432	81.0853	56.0367	80.6855	63.1682	54.964	71.6502	49.957	52.757	48.2146
116.38	122.003	103.731	99.9977	116.659	120.693	120.403	103.804	83.6465	111.399	82.632	84.5475	68.3559	88.4677	125.598	73.7127	85.8124	102.3	84.9992		53.1898	52.5672	54.8998	68.0844	54.3192	83.6605	75.2293	76.3627	81.3855	56.4681	82.7368	62.0994	55.9017	73.7728	51.2022	53.4189	50.8934
118.91	125.016	104.549	100.847	118.247	119.267	121.929	103.957	82.1234	115.328	81.4888	83.9727	68.7022	88.1547	125.532	74.4388	86.5007	101.847	84.054		54.1338	54.8587	56.4821	68.7789	57.7721	87.2856	76.3697	78.4384	81.4731	57.4655	82.4075	63.6926	56.7193	75.5063	51.0178	54.0146	49.314
121.44	122.699	103.528	100.188	118.872	119.142	119.659	106.079	82.1254	114.396	84.3074	85.7836	68.2052	89.226	131.094	78.2333	89.3433	103.571	87.7688		55.1353	54.133	57.8596	68.0337	60.2348	88.2905	76.4639	80.0529	83.5913	57.9768	84.0528	66.0302	57.9265	73.9214	52.2535	55.8118	51.2039
123.97	123.408	104.139	100.978	119.108	117.557	121.287	105.01	82.1119	114.125	84.1718	86.4761	68.4276	88.719	122.918	73.8671	85.645	101.066	85.3855		54.0429	56.561	58.9654	70.272	63.0748	91.2638	79.9661	80.5613	83.1009	58.705	85.2981	66.4393	59.1225	75.0271	52.7009	57.0074	54.3708
126.5	120.311	103.222	100.964	118.307	116.653	120.628	103.68	82.7941	115.274	81.6466	85.521	68.028	89.8251	127.128	73.7322	86.8403	100.812	85.7647		57.2618	56.3532	60.9326	71.1398	62.0901	91.5063	79.5693	80.7478	84.7875	58.8158	87.6753	67.212	60.9597	76.2973	55.7691	56.5908	50.8387
129.03	127.424	103.79	101.751	118.992	117.296	122.524	104.341	83.3607	117.732	84.0549	87.104	69.0751	89.846	124.206	75.2021	84.3135	101.049	85.7464		57.9452	57.5498	61.1215	75.3383	62.8923	93.8089	77.72	80.7693	86.9094	60.3494	87.0256	64.7537	61.9574	79.3365	54.7604	58.1907	53.9901
131.56	127.465	102.506	100.831	119.529	118.192	120.38	104.223	84.2114	116.886	83.9652	88.2338	68.4737	88.7241	123.565	75.7065	85.8841	101.903	84.4382		57.3555	59.1655	61.7898	75.9161	65.4808	95.7413	79.5386	84.2128	85.8497	60.6122	88.5602	66.8311	63.1046	80.3876	56.0383	57.4807	55.5131
134.09	127.325	104.234	100.651	118.163	117.906	119.515	105.601	84.5159	115.744	83.9555	90.0422	68.5711	89.1715	126.002	73.2084	86.3712	100.767	85.1229		59.9859	58.9548	62.4675	77.9294	64.9645	95.98	79.6527	83.2171	87.6262	60.6202	90.4862	70.7801	63.8242	80.2311	55.3402	59.6707	56.4993
136.62	131.641	104.624	101.411	118.503	114.88	120.611	103.317	86.6696	116.677	85.534	90.4391	68.275	90.0976	128.958	73.3809	86.0669	101.865	84.314		60.2956	60.7483	63.8353	79.3185	65.2931	95.7993	78.6763	84.078	89.0604	61.4283	91.0229	69.2642	65.6059	78.8614	58.0608	60.0615	56.3287
139.15	129.137	102.971	101.649	117.996	115.851	118.966	105.991	83.6975	118.802	86.8345	87.9102	66.3502	89.9836	125.213	72.2906	84.8654	99.1942	85.2426		62.8437	62.2739	64.6314	81.009	65.6246	97.9603	80.5917	85.1788	90.577	61.6907	93.0801	71.7108	66.4901	81.5409	58.6361	61.6672	57.4743
141.68	132.375	103.286	102.23	117.535	113.403	120.949	105.14	84.0055	115.986	85.4566	88.1596	68.2236	90.3303	123.728	71.2373	85.4191	99.1212	85.083		61.4439	62.4728	65.4714	82.3537	67.1275	100.678	81.9755	87.1536	90.971	63.0081	95.576	73.1635	67.484	82.6834	59.3273	61.5352	57.3907
144.21	126.762	104.749	102.566	118.142	116.66	122.051	105.877	85.7996	116.806	84.2271	88.5552	70.8667	90.4958	125.909	71.9148	84.6885	98.7089	85.5288		63.5156	64.5673	66.1008	82.1101	71.0205	98.9536	81.98	87.9254	92.2389	63.0366	94.2964	71.8616	68.1142	84.092	62.7895	62.0387	56.9088
146.74	127.771	104.133	102.633	118.349	111.828	118.354	104.682	86.6884	120.626	85.4433	86.5822	67.8583	90.0307	126.653	71.7776	85.1114	100.936	84.6399		63.5054	62.878	65.3195	84.8139	73.3738	102.218	82.105	89.0651	92.2684	64.4534	97.6964	74.0005	69.914	84.0084	61.6535	63.7141	55.716
149.27	127.128	104.251	102.864	119.691	114.703	122.669	105.175	85.754	119.624	86.1714	91.2404	66.5304	90.8568	127.722	71.3618	84.7511	99.6342	84.7311		66.5073	65.3395	66.7546	87.7187	74.7995	105.819	84.6048	88.9611	91.4892	63.1321	95.8237	74.2931	70.9332	86.1253	61.9981	63.1622	58.7367
151.8	130.85	103.288	102.701	119.666	116.339	123.897	105.452	83.8788	120.554	86.8187	87.9934	70.4101	88.1527	125.132	71.5892	85.0825	101.215	82.5939		69.5206	66.6894	67.522	88.5529	76.9992	103.333	84.6131	87.5306	92.2508	64.4156	99.1885	77.4471	71.4606	87.2838	64.1584	64.8644	60.0505
154.33	131.562	104.447	102.658	119.844	109.942	122.976	107.038	87.5838	117.758	86.1444	89.243	70.2331	90.0337	127.33	70.3557	85.5523	100.115	84.4599		69.3972	67.0449	68.9293	88.8405	78.6221	105.715	86.9679	87.9129	94.929	65.061	98.6833	76.0658	72.9838	87.143	62.5772	63.9089	61.8392
156.86	123.159	104.694	103.34	119.561	111.882	122.881	107.787	87.1941	119.154	87.9302	88.9841	72.3374	90.8185	126.845	70.1018	84.89	99.4882	84.6935		73.3409	66.0873	67.3375	86.4098	82.6441	105.289	85.26	91.6897	93.2539	64.6123	98.1311	77.0494	73.1765	87.9577	63.1159	65.7162	61.3918
159.39	129.838	103.843	103.35	119.881	111.533	120.846	106.543	85.9587	119.708	86.7808	87.0626	69.149	89.7489	126.299	70.6239	84.554	99.6846	84.1257		72.5512	68.9275	70.5005	89.0306	82.4003	106.219	85.7661	91.668	93.2996	64.9899	100.113	77.423	73.5437	90.0232	65.3083	67.0059	61.7143
161.92	129.681	104.416	103.007	118.135	112.285	123.612	106.77	88.1521	122.214	87.4153	90.0075	69.9083	90.2058	125.107	70.5136	84.532	99.3818	82.5265		77.0286	69.8592	71.3382	90.8415	82.2035	109.089	87.1985	91.9492	95.0564	66.0133	100.915	80.3457	74.993	90.5863	67.2576	68.8837	63.9575
164.45	129.132	103.746	102.811	118.266	112.097	121.52	106.677	88.3349	118.214	87.0343	88.7642	70.5257	90.2417	125.259	69.6342	85.6837	99.9263	83.8236		78.2374	68.1362	71.7195	90.8767	85.0551	109.023	89.8994	91.9915	95.748	66.695	100.887	80.1167	75.3887	89.7464	65.0976	66.5938	62.2845
166.98	129.096	103.179	102.763	117.984	111.894	123.942	106.234	86.9868	119.686	85.9585	92.8854	69.0209	89.0555	127.67	69.8694	84.5119	98.5572	82.8589		77.6106	72.2591	72.3087	94.5145	84.6858	108.372	88.1918	92.0842	96.2314	67.4123	100.909	78.464	76.438	90.4636	67.5091	67.5453	64.1283
169.51	124.033	104.827	103.794	118.849	109.608	123.131	107.624	89.7577	120.714	87.0606	91.8091	69.2887	90.65	131.023	68.4506	84.1755	99.6838	83.9003		78.1304	71.3321	72.1981	91.5626	85.8356	108.949	89.1777	94.6446	98.2459	67.7676	103.397	81.4562	77.092	91.0295	67.4327	67.9954	62.6509
172.04	129.673	104.309	103.845	119.037	109.507	124.214	107.98	88.261	121.37	88.3182	90.3313	70.0598	90.017	128.264	69.4026	83.8526	99.0663	83.2987		80.1846	72.2268	72.4288	94.1434	86.9165	111.263	90.2864	92.9234	97.9418	67.5051	105.604	85.3525	78.2916	92.0646	66.515	69.3785	69.6249
174.57	125.722	103.774	104.293	117.53	111.777	127.31	109.097	90.338	121.478	89.3169	90.6994	71.9848	89.4027	129.075	68.5031	82.7546	97.4851	82.868		79.2055	74.006	73.2427	93.9745	88.6889	109.411	89.3316	95.3412	99.0368	68.9609	104.545	83.9651	78.8086	92.6338	68.933	68.4393	63.6762
177.1	127.705	103.544	103.894	118.801	112.674	126.003	109.647	90.3918	120.314	88.0736	91.3633	72.4763	90.8069	125.616	70.4314	84.4183	97.5156	82.3476		79.95	74.6348	74.498	95.0506	91.2572	111.189	88.9975	97.4593	99.531	69.1796	105.717	83.767	79.2513	94.5228	69.8438	70.2733	66.3672
179.63	122.924	103.524	103.633	118.205	111.348	126.917	109.858	88.1996	120.633	88.2722	91.2728	72.8341	90.9217	126.645	69.2953	84.0605	97.0307	82.3995		81.2587	74.3586	75.1368	98.0858	90.9689	114.043	89.6039	97.8361	100.06	69.9949	107.577	83.0779	80.7746	93.6173	69.2899	68.6789	65.8666
182.16	125.775	104.247	103.989	118.395	111.931	129.668	111.457	89.7552	120.169	88.8553	93.1007	71.2674	90.8807	124.471	69.5746	85.0599	98.0791	82.2209		79.9604	74.3572	74.4032	98.5427	93.6748	114.715	92.0413	96.7365	98.2606	69.2718	107.959	87.4753	81.2406	93.8278	68.7161	70.0037	67.3926
184.69	125.513	102.111	104.392	117.766	110.372	128.363	109.888	89.7245	121.979	90.9087	92.0841	71.6002	90.5165	132.413	69.3918	84.4192	97.9158	82.1809		79.7394	75.5464	76.8442	95.29	91.8896	112.278	92.4965	100.123	98.1357	71.6419	108.381	85.9901	82.0947	94.3703	68.9589	71.0478	67.1785
187.22	125.977	104.209	105.257	118.61	110.064	128.67	110.934	90.1262	117.908	87.3306	92.4967	71.8693	90.8339	129.363	69.2703	83.5824	96.5674	81.6467		79.8245	77.436	74.7163	96.4326	92.8362	114.765	90.2276	98.2862	100.703	70.4648	107.77	84.7646	82.3746	96.6859	70.0186	71.013	67.0356
189.75	125.533	103.769	103.822	117.452	109.459	127.669	110.484	91.663	121.042	89.4612	92.9026	72.5854	90.041	131.019	68.6264	83.4006	95.7823	80.6615		85.2392	77.6826	77.0034	96.6987	93.6166	113.947	91.2761	99.428	100.351	71.1565	110.94	86.5247	81.9274	96.9778	72.143	71.5223	67.6926
192.28	128.07	103.672	104.878	117.84	108.6	128.943	109.62	90.8881	125.017	90.2724	95.2384	71.8965	91.7038	131.003	70.1848	83.4079	95.5563	81.5786		85.4163	77.9614	76.9782	97.0647	94.8093	115.641	89.3149	100.127	99.6058	71.7692	110.128	86.3979	83.2204	96.4742	71.0423	73.1342	68.612
194.81	128.151	102.647	105.864	117.329	107.988	125.722	111.431	92.2188	123.149	89.6067	92.904	73.3253	92.6376	128.326	69.4741	85.1033	94.9176	82.2467		84.6112	78.1014	76.6326	96.1359	94.8635	117.213	92.2426	101.967	99.5534	72.2293	111.108	89.1605	84.1237	97.3122	70.1775	72.4762	66.5921
197.34	127.385	102.982	104.434	118.66	106.107	126.075	110.238	91.597	124.707	90.095	93.3545	72.6477	91.1328	132.698	70.6198	83.7954	94.0181	80.9786		87.0294	79.5084	77.9954	97.1054	97.4918	116.088	92.9391	100.614	100.824	72.3697	110.121	89.0223	84.1427	97.1196	74.7716	73.4094	63.8634
199.87	127.394	103.469	104.685	116.646	108.749	127.546	111.859	91.2311	124.036	89.2331	94.637	74.4111	90.4393	131.945	70.1368	83.5467	94.2859	79.7626		86.7632	79.6861	78.4001	97.6191	97.7316	114.908	92.6619	101.797	99.8428	72.9931	112.678	89.3137	84.9023	97.3052	72.2801	71.8879	67.6812
202.4	127.333	102.336	105.005	118.804	107.207	125.714	110.922	95.087	122.557	89.2085	92.0417	74.4476	91.1057	134.283	70.3102	83.4601	96.7564	80.9632		86.9861	80.4585	77.9262	105.325	99.3804	114.229	92.4714	102.045	100.884	73.738	112.489	92.604	85.1686	98.9606	72.7642	73.8393	67.2381
204.93	125.381	102.979	104.884	118.282	107.476	131.001	110.796	94.9922	123.947	89.301	94.7899	72.7735	90.4715	131.257	69.64	84.292	94.3722	79.6946		85.3878	79.3275	79.697	105.277	100.586	115.363	92.807	104.134	101.672	74.2516	111.022	89.6539	86.2963	97.8273	74.4313	75.1101	69.2187
207.46	130.248	103.418	106.141	117.971	107.13	128.211	110.862	94.9621	125.372	90.0045	93.1128	74.3801	91.9561	134.075	68.2976	83.0506	94.5068	80.3677		88.1224	81.3975	80.4117	102.081	100.394	116.14	93.8945	100.176	101.299	73.9494	113.072	89.6798	86.2076	97.5893	73.248	75.4104	66.787
209.99	127.895	102.118	105.292	119.349	106.179	129.585	110.226	94.2747	122.843	88.8503	91.4511	73.6693	92.187	136.254	70.2087	83.6352	93.5175	80.9295		87.9304	81.6373	80.5279	105.927	100.069	116.886	96.4866	102.966	101.489	73.9528	114.545	92.7783	87.1225	98.7546	75.0294	75.4577	68.0087
212.52	126.585	102.643	105.565	118.958	105.304	136.122	114.387	97.1969	129.373	93.0502	95.9534	76.577	92.0432	135.998	68.7344	83.2153	94.3733	79.6408		89.1839	81.1135	80.1744	103.693	100.424	120.012	99.1313	105.914	103.03	74.5398	114.238	92.2531	88.1316	99.9036	75.2044	75.8572	69.575
215.05	133.5	102.397	106.172	118.585	108.4	129.439	109.248	94.7781	127.108	89.0484	92.7446	75.6405	91.5345	133.172	70.4952	82.4828	93.1387	79.4113		89.8578	83.2189	80.9068	102.632	103.125	120.131	93.9391	102.79	99.7371	75.6139	114.593	89.7882	88.1236	98.5293	76.2089	75.257	67.1773
217.58	127.946	102.231	107.285	118.85	106.862	127.042	108.624	94.0405	125.714	89.2276	93.9924	73.7748	91.9355	131.946	68.8944	81.6743	94.4963	78.8339		93.4276	83.4507	82.2345	105.046	101.691	116.696	95.9962	103.471	100.661	75.5186	115.616	92.8789	88.6725	98.4366	74.3618	77.6299	71.9395
220.11	130.2	101.341	106.417	118.515	109.042	128.914	109.827	94.2123	126.461	89.9453	93.0852	72.7274	92.6007	135.394	70.3356	83.1086	92.0631	79.7382		89.7456	85.6779	82.4704	104.173	105.917	117.987	96.2173	103.591	102.505	75.3747	116.203	91.7287	88.5953	98.5527	75.3736	77.8314	68.1039
222.64	131.49	101.549	105.826	118.621	108.174	127.745	108.157	95.4625	124.179	89.7201	92.5552	73.4036	93.3853	133.828	69.9546	84.5407	93.1206	79.6893		91.2581	85.1101	82.0993	103.564	104.189	119.12	94.8179	105.626	102.381	76.5169	116.43	89.2348	89.082	99.7124	75.7731	78.482	66.7258
225.17	130.772	102.685	106.687	120.168	103.249	127.503	110.534	94.3801	124.875	89.8888	92.2395	73.2724	92.8099	134.798	69.984	84.0776	91.123	79.5235		93.8677	84.5713	82.1533	104.478	106.485	115.798	95.3315	106.293	102.255	76.5607	116.677	91.8277	90.3815	101.776	75.7243	77.7141	69.4887
227.7	129.965	102.19	106.499	117.937	107.222	126.305	107.663	95.4158	126.13	88.924	93.2193	71.6146	94.1221	134.368	68.9309	83.3875	93.1466	80.2943		94.4269	85.6127	82.4585	109.363	106.98	119.33	96.5553	106.61	103.163	77.7535	117.284	92.2881	90.6032	100.562	77.4944	78.5257	71.0352
230.23	125.438	100.66	107.488	118.703	106.636	126.307	109.052	94.5555	127.364	91.6013	92.5765	72.3678	93.2613	135.205	70.0596	83.1766	92.6335	79.0196		93.5925	85.6635	82.7578	108.971	108.275	117.355	94.206	105.977	101.679	77.185	118.6	93.4089	90.8412	101.76	76.825	77.0047	70.7568
232.76	126.528	101.822	106.931	118.67	106.346	127.655	107.607	96.2373	127.375	88.9544	93.576	70.6647	93.8105	139.366	69.8886	84.2516	93.9296	79.1307		93.7307	85.435	84.644	107.899	109.72	119.426	97.8032	105.941	103.335	78.2782	115.947	92.7062	90.5556	101.994	80.9406	78.609	71.0861
235.29	132.487	100.453	106.789	118.481	108.236	127.938	109.529	97.1102	126.672	91.148	91.5601	72.9621	94.444	135.536	69.304	83.5491	92.4051	80.5303		94.7326	88.2966	82.9781	111.888	110.304	116.791	96.0019	104.387	103.499	78.0324	118.525	92.1571	90.4572	100.387	80.096	79.5232	71.0324
237.82	129.838	100.772	105.715	119.144	104.875	127.551	108.865	96.7609	125.031	91.2442	92.029	73.1208	95.2114	136.363	70.388	83.1459	91.2787	80.0221		98.0242	86.584	82.1646	111.601	110.975	118.765	95.9248	106.726	102.056	78.8327	117.718	93.965	91.6138	101.421	78.9932	79.0995	67.3786
240.35	131.31	102.179	106.758	117.924	108.693	129.469	109.846	96.0995	123.669	90.3636	92.3494	72.4449	95.582	137.526	71.2357	83.2304	93.624	79.858		98.5361	87.5983	84.3806	107.298	109.386	117.685	96.7859	106.027	103.36	78.734	117.557	95.2222	91.0995	101.506	80.6255	79.625	73.5368
242.88	130.406	101.319	107.856	119.444	106.702	124.91	108.144	95.9783	124.968	89.7666	92.6306	73.1132	94.3694	136.047	69.0352	83.3589	92.229	78.6025		95.5987	88.8599	85.4658	106.097	113.014	116.75	96.8497	104.801	102.769	78.8942	118.142	96.4853	92.2934	101.429	82.23	78.4303	73.0106
245.41	131.499	101.136	108.632	119.017	105.857	126.245	108.272	96.5694	127.521	88.6925	94.3929	71.0188	94.1014	134.703	69.7214	82.7036	92.4845	77.7235		96.0998	88.6537	84.7682	107.888	112.969	118.37	96.0733	108.706	102.182	79.1245	118.704	96.0699	92.496	100.932	82.0489	79.6652	71.2663
247.94	136.757	102.263	109.315	120.255	110.981	129.139	109.085	95.5313	126.405	89.7941	91.4069	73.4699	95.9628	136.018	69.0737	83.5462	90.3139	78.8561		95.2247	89.5045	86.9908	108.915	111.707	116.47	95.1056	105.513	103.763	79.6021	117.061	93.782	93.1749	102.173	83.3312	79.055	72.1321
250.47	133.488	102.36	109.214	119.407	109.69	124.617	105.567	95.8533	124.31	88.6825	92.5239	72.1241	95.5937	134.788	67.3803	82.9708	89.504	78.8952		99.3541	90.6453	85.03	110.75	112.125	116.148	98.2619	106.572	101.881	79.7274	119.346	94.8028	93.4214	102.352	81.1223	80.0047	71.3241
253	133.877	102.847	108.192	119.597	110.783	126.634	106.745	96.0285	126.305	88.4978	91.3529	72.9263	95.5828	140.028	69.4385	82.4069	90.0028	78.2008		97.5777	90.5098	84.9404	108.113	112.427	117.882	95.2077	107.287	103.862	80.1191	117.096	96.0184	92.9546	102.368	83.6573	82.2636	70.6071
255.53	136.475	102.273	108.776	120.547	111.858	125.927	105.064	95.3639	124.483	88.1078	88.9203	72.8481	97.8856	134.989	67.3175	82.252	91.2262	80.1358		98.2422	89.7835	86.1893	109.381	112.254	114.282	96.1701	107.657	103.136	80.989	117.293	95.2988	92.9582	103.215	86.3888	82.1608	69.1361
258.06	131.111	102.645	108.368	121.397	114.453	125.37	105.918	97.3483	124.844	89.9514	91.1478	72.9316	96.4555	138.19	67.6892	82.8399	87.9487	79.4052		98.3643	89.9937	87.1014	110.879	117.15	114.108	97.894	106.265	102.709	80.6824	118.49	97.3028	94.0745	101.536	86.1794	81.5174	69.7108
260.59	133.208	102.251	109.663	120.772	111.667	124.879	105.339	96.2643	125.408	89.6479	91.4292	74.6406	96.8163	131.868	68.1907	81.697	88.9426	78.7118		102.533	90.8654	87.98	109.872	115.902	116.052	94.8886	105.899	102.368	81.1129	118.214	97.4983	93.0603	103.163	84.3359	82.5551	72.0322
263.12	135.832	101.936	108.769	120.713	117.086	124.396	107.056	95.5654	126.934	90.1172	90.1584	76.0216	96.0747	136.736	68.3046	82.8521	89.5164	78.1353		102.532	89.8386	86.7763	112.215	116.557	114.971	101.129	106.684	102.507	81.4856	116.21	101.43	94.0686	103.319	84.9724	82.4125	71.0611
265.65	135.412	102.127	109.38	120.685	115.762	125.547	105.967	98.5055	124.714	89.3702	88.9175	75.1485	95.6979	137.352	66.9941	81.5767	89.1812	77.5313		101.242	91.6872	87.3654	112.671	116.67	113.04	92.492	105.234	102.161	81.0919	119.784	103.764	95.7652	108.213	88.7558	85.4534	77.9759
268.18	132.268	101.627	108.454	119.858	117.909	123.496	105.178	98.6113	123.873	88.6279	89.3281	73.9668	95.8903	133.755	65.6749	82.525	86.9944	77.4466		101.443	91.7418	85.8459	113.128	118.994	114.924	95.2599	105.987	100.866	81.6523	118.345	97.9586	94.1609	101.645	87.633	83.1807	72.638
270.71	132.631	101.025	109.386	119.238	118.992	124.035	106.099	100.639	124.785	89.9835	92.307	73.7334	96.9368	131.817	65.2727	81.7749	87.9338	77.8237		104.039	93.5601	88.4769	113.12	120.276	115.553	93.4805	102.839	102.822	81.3628	117.173	98.6411	93.885	104.277	87.4124	82.6301	71.0331
273.24	137.434	101.852	108.973	118.944	121.157	123.463	105.37	97.4353	120.725	87.6517	91.1601	76.1936	96.951	132.907	65.3518	81.07	88.0517	78.0434		104.098	91.7368	89.4926	113.788	119.268	112.117	97.1657	103.546	101.455	80.7738	117.847	101.18	94.1675	104.283	85.6815	80.9724	71.1533

## Sheet: Panel g (local uncaging)
Time (sec)	No photo-GLP1						10 μM Photo-GLP1
-22.4	33.6029	-3.68639	5.09498	-1.07573	4.5107		-3.24646	0.509929	1.19304	-1.25784	-1.40838	-3.10006
-21.28	-5.23565	-2.61263	-1.23789	1.52389	7.7788		3.14323	4.96801	-10.5032	-1.53786	-7.1365	1.4662
-20.16	-0.93128	-0.7752	-1.74069	-5.86434	4.04647		-8.39953	-7.93406	-2.7541	2.75033	2.76198	-17.6052
-19.04	2.13159	-1.12466	-6.26027	2.00588	0.750627		-1.23679	-5.81843	-7.00802	3.55532	6.17852	7.0365
-17.92	-2.82793	-0.63849	-3.51386	3.09011	-6.92857		-0.47923	-5.21816	-7.82156	-2.2748	-1.63886	-7.97781
-16.8	-0.75536	-0.24872	-0.93861	1.98339	-14.7113		0.243095	5.57292	13.1194	0.371307	7.98711	-10.3151
-15.68	1.48224	-3.07754	-1.1507	-8.68882	-3.76774		1.59148	5.76118	1.59022	-2.17413	0.320231	5.94851
-14.56	-1.04638	-1.03866	-0.53103	7.98333	-4.42063		1.20636	-1.91124	6.95899	-1.46902	-0.83895	2.97614
-13.44	3.00318	1.1315	-1.36065	5.42674	-2.85223		-1.88914	-7.27206	-17.9099	0.692352	4.18417	-4.31729
-12.32	-6.5872	3.27812	-0.5337	-10.5307	-4.35034		-5.20587	-12.3597	-4.36473	-1.5794	-4.04806	5.25153
-11.2	-4.84474	-0.15185	1.35527	1.96677	7.9471		8.23383	2.63944	0.58221	-1.0213	-0.22344	-4.73923
-10.08	-1.32798	2.85396	-0.81933	3.07447	-5.10495		5.39758	8.04655	-3.86619	-0.75551	0.511402	-4.67075
-8.96	2.96337	2.86527	2.92625	-1.43746	5.62411		3.47058	4.06529	-10.8237	1.19546	-1.21043	0.338436
-7.84	-2.89959	3.63303	-2.9113	-8.5451	-8.14001		2.12219	6.64539	21.3287	3.43007	-1.86663	-0.0327
-6.72	-7.59994	-1.08483	-1.49892	-6.71589	-1.24501		5.42435	5.99266	8.69014	-0.7361	1.56077	16.5556
-5.6	-7.50077	-1.07261	5.61676	5.43749	9.43411		2.1856	-11.1916	19.2332	2.58599	0.958803	3.6223
-4.48	-0.73654	1.02829	0.545977	-1.02294	5.0896		-1.99247	0.639543	-18.7399	-1.69457	-0.80641	7.11714
-3.36	4.62185	3.21973	0.393799	1.97068	-5.09939		-0.87704	-1.13042	8.53675	-0.80766	-10.1667	1.7081
-2.24	-2.80331	-1.63258	4.0514	0.48756	1.71977		-8.06937	4.62235	-0.03684	0.940925	10.8031	-0.54631
-1.12	-2.70848	-0.86573	2.51251	8.93069	9.71893		-1.62238	3.37243	2.5955	-0.21358	-5.92174	1.28395
0	-15.9249	-8.14532	-3.94926	-5.92789	4.14634		45.5166	60.5082	62.2162	16.3907	62.0729	25.0795
1.12	-9.48936	-6.91493	0.196158	-1.75912	-7.6055		49.008	68.3658	52.4374	21.0168	37.7842	31.9068
2.24	-5.7822	-0.52985	-0.36334	-8.16479	20.3333		52.4304	75.2281	59.54	28.8249	50.5732	38.0769
3.36	-3.80593	2.01423	1.70402	26.7555	1.18526		60.3432	69.3812	73.6741	29.2099	60.4798	59.0161
4.48	-7.453	7.1988	-0.10659	-0.68759	1.50153		60.2742	59.5653	61.9149	32.1935	85.8775	44.8722
5.6	-5.96246	-1.6697	3.17605	-0.30923	-5.36573		67.5172	63.7086	68.0862	34.089	62.4389	48.0522
6.72	-3.38606	-2.63708	4.98532	-2.58915	22.4288		68.6218	76.7311	61.5259	36.5217	68.4328	72.8795
7.84	-7.58329	1.5113	7.22252	-3.52967	19.9505		72.396	92.7965	85.9155	36.568	73.8274	53.9351
8.96	-16.0465	-1.30664	-0.67144	5.88233	17.6423		70.9495	89.4526	63.8077	40.4198	73.5657	67.6284
10.08	-1.62913	7.23637	5.58654	1.87194	4.79183		72.5336	81.7647	75.8353	41.7289	80.8638	54.7205
11.2	-6.51915	0.720016	1.54382	2.62377	1.93062		71.9757	86.8694	65.8675	44.617	72.2574	55.9863
12.32	-0.6323	-3.41479	3.71816	-4.30691	15.5357		66.9978	99.5107	73.2003	41.3583	68.9507	76.4792
13.44	-6.83767	-2.0074	-3.61816	-6.99257	-6.81945		86.8211	83.9807	98.754	44.0017	63.4815	68.1254
14.56	-2.16193	-1.5357	-3.83667	-2.42882	23.2593		91.5256	94.9507	93.6125	45.1075	79.8226	68.2524
15.68	-1.76305	5.04404	2.39483	-6.82929	13.2275		71.793	107.046	102.049	46.7736	91.0619	61.8217
16.8	-10.9676	3.98431	0.72196	4.496	7.66597		86.4899	111.596	98.7348	45.4234	95.9793	70.3357
17.92	-4.66738	-1.10475	0.22638	8.12119	10.0944		75.1543	110.817	78.2869	46.3533	72.2398	63.8961
19.04	-8.7944	-1.49496	4.58308	-0.27111	9.46555		69.3588	109.347	106.914	43.3371	82.4867	67.984
20.16	-3.19784	-1.09932	6.05324	6.05049	23.3924		84.1163	105.066	101.427	47.892	80.8313	68.4667
21.28	-6.30197	-3.38174	4.32553	-2.90103	-0.96758		75.7362	91.7349	94.9438	50.6002	77.7673	70.3876
22.4	-1.82168	-2.7842	2.48817	3.31497	14.6516		86.6177	99.432	101.31	48.6734	85.5711	73.7002
23.52	-3.92972	-6.51249	6.21557	-0.25937	6.38425		75.4478	92.3459	101.257	51.4836	79.4999	56.8136
24.64	-0.90015	1.98888	-4.89683	1.85337	13.1165		74.5433	115.902	86.1894	44.9137	92.1384	73.4262
25.76	5.55062	0.772976	1.36115	-8.42094	6.39351		86.3589	93.4693	112.258	45.1995	71.0793	69.8353
26.88	-2.2792	7.5691	-1.53235	-1.32503	12.7318		87.3269	113.093	83.4311	50.6983	87.7322	67.9387
28	3.1248	-0.24058	-6.11665	1.97166	26.0169		80.313	104.08	127.669	46.1292	80.9181	72.769
29.12	-4.02528	-3.06441	1.47028	-0.99751	18.7353		83.7115	106.561	108.508	48.5696	78.479	73.7973
30.24	-4.94536	2.74396	-2.33095	1.62557	9.28616		88.2385	111.8	100.967	52.8719	73.22	68.4446
31.36	-2.8091	0.819605	1.00198	5.05815	22.3382		86.9511	110.658	124.212	50.9116	86.6177	57.4785
32.48	-10.3443	-3.38898	-3.24401	6.74268	9.05865		76.5515	114.621	100.063	46.946	84.0797	62.0459
33.6	-2.45729	-2.94717	-0.54414	1.45936	18.5282		110.042	153.301	141.507	70.7805	134.851	117.906
34.72	-0.32391	1.3592	0.302332	-6.84005	20.5756		94.452	126.855	113.168	50.4978	94.0175	76.6902
35.84	1.57128	3.89467	-0.20154	2.18968	13.9377		86.4298	103.143	118.451	48.8068	88.4223	73.3611
36.96	-6.13402	1.49139	0.477512	1.21397	11.7331		93.7137	115.687	87.5234	55.8195	87.7932	70.9498
38.08	-2.18654	2.48774	-4.82783	-4.11236	6.39536		84.4906	113.022	105.062	50.0772	83.0982	65.7396
39.2	-4.93523	1.70324	0.109237	4.1499	6.4379		81.4017	117.362	92.2156	49.1922	107.346	78.9568
40.32	-7.90616	2.58009	-1.58022	-10.3	9.60612		89.2083	110.188	80.3057	45.4225	87.0421	56.9218
41.44	-12.2352	4.65382	-3.22475	0.313541	2.73701		91.434	121.935	96.086	52.1846	89.9828	70.7156
42.56	-6.9202	5.10153	-2.0758	0.039793	7.07228		83.394	110.532	80.8097	48.4801	96.2695	64.0662
43.68	-4.23086	-3.75565	-4.29132	-4.05956	1.92322		78.0751	122.13	109.749	50.5739	91.7195	78.2719
44.8	-12.3474	-1.2487	-3.5759	-7.91744	-11.1288		80.4126	120.258	100.537	47.2801	76.0251	54.2808
45.92	-1.22373	-8.04844	-0.69819	-6.21141	-7.42794		91.7492	97.5663	99.8524	41.5234	104.583	84.5215
47.04	-10.872	-7.06069	-8.52688	-5.52802	8.20233		82.232	115.123	92.2786	49.7848	96.4457	60.6111
48.16	-4.60223	-0.36733	0.613372	4.92324	9.81697		93.4216	104.632	101.529	46.0965	80.5195	75.9479
49.28	-5.80827	-5.81264	-4.44778	-11.8291	11.3262		78.6129	109.069	95.508	50.7122	76.501	68.8633
50.4	-1.84051	-4.39394	-4.42906	-7.43448	-5.06426		82.0578	102.629	104.386	44.7346	85.3311	59.0989
51.52	-12.3857	-4.01549	-0.98542	-8.97723	5.57602		86.3509	113.228	118.788	49.665	85.6673	72.2255
52.64	-3.70603	-2.13868	-8.05403	5.46486	0.632255		85.8719	118.054	126.841	46.3342	74.5053	69.4586
53.76	-3.83199	-8.65322	-6.31135	4.04921	8.85706		87.1691	109.072	96.3216	47.2956	89.4038	61.6527
54.88	-5.5397	-3.53022	-4.15974	-3.2745	0.349282		72.326	107.078	94.1138	47.48	68.9059	69.156
56	-7.45951	-12.3526	-5.79009	-9.294	6.90027		81.4698	97.0216	90.2269	41.2766	83.7503	60.6166
57.12	-1.38517	-7.54415	-7.44398	-12.3961	13.5419		86.064	106.253	91.1802	47.5324	92.2049	66.9612
58.24	-9.90488	-6.65147	-4.55316	-2.77784	-8.3379		87.9135	105.651	133.391	52.7763	69.5011	75.8872
59.36	-7.06498	-0.99112	-7.80825	-9.13464	4.90094		81.9263	115.249	100.899	46.615	91.7561	59.5916
60.48	-1.95416	-3.05264	-3.70829	-7.67987	1.06504		85.4788	115.624	99.2744	48.1786	85.1101	66.536
61.6	-10.1503	0.872113	-7.36295	-4.61097	11.2947		91.7055	108.279	106.363	48.199	90.2986	68.9616
62.72	-3.15368	-3.68413	-2.90649	2.07334	17.4869		89.8179	91.0358	99.2552	49.5522	82.3687	58.5444
63.84	-6.71677	-2.77288	-10.1262	-11.1486	8.64807		85.6713	89.3322	121.615	48.7309	100.407	71.3519
64.96	-2.87208	-0.4882	-7.62692	-4.39588	0.894892		92.2099	106.382	105.503	54.7418	85.7175	62.7694
66.08	-6.24044	-1.26228	-6.38115	-10.6647	23.3351		83.038	105.347	91.4787	45.1527	76.2732	79.5223
67.2	0.027186	-4.35727	-14.0339	-4.44379	-7.91436		76.5431	78.1399	78.9854	48.1505	86.7479	67.4715
68.32	-5.76845	-4.01142	-6.1795	-14.3632	-1.68889		82.8539	114.981	84.1268	48.6277	94.5653	68.5142
69.44	-6.88327	-1.97662	-9.94702	-7.31031	8.57223		93.7837	110.938	97.5432	49.8688	100.668	73.0683
70.56	5.14668	-3.87335	-3.88079	-9.68409	5.69624		85.3858	124.898	99.803	46.5832	90.1359	69.6829
71.68	-4.44442	-9.56176	-5.59058	-3.81026	10.7843		84.1778	101.455	118.454	48.7164	79.9704	69.9292
72.8	-7.18225	-0.10794	-6.07252	-17.874	4.90649		93.1802	104.591	120.832	47.554	83.067	87.5547
73.92	-11.3057	-5.8982	-12.0585	-6.49396	-6.08889		91.5294	125.734	102.274	48.7732	87.9789	92.1265
75.04	-0.87119	-5.3749	-10.9125	-10.127	12.6319		93.5907	112.76	107.243	48.5875	84.7034	68.9373
76.16	1.59879	2.26366	-4.07711	-8.77779	7.46622		96.6543	116.787	126.11	49.3445	96.5379	73.1291
77.28	-7.08525	-4.34912	-6.47235	-6.2642	15.863		91.9652	111.053	96.6749	48.4749	84.6275	79.5311
78.4	-8.04805	-5.0277	-8.79138	-6.81463	3.65437		91.752	124.886	84.0939	50.2868	87.5586	74.8147
79.52	-5.15312	2.78877	-9.14655	-14.6721	-0.04467		90.0734	98.5879	81.2397	49.087	83.6296	56.6126
80.64	-1.60017	-0.70503	-6.12949	-10.2511	-2.31958		79.9984	103.183	115.175	50.2663	87.884	74.3408
81.76	1.09423	-2.38539	-8.01017	0.764246	-6.64745		88.5503	123.587	109.185	48.79	82.8623	80.8213
82.88	0.212506	-0.96533	-8.90906	-12.1019	-4.12655		90.1589	104.743	100.795	54.995	94.1734	73.6593
84	2.10119	2.52441	-13.9034	-5.48598	-4.52235		75.4676	109.322	115.46	49.9844	101.556	70.1788
85.12	-2.62668	-1.69912	-7.61622	-9.7447	-4.28191		88.9843	121.119	118.265	46.3423	87.1749	48.779
86.24							85.6694	104.638	84.4719	47.9925	104.975	74.322
87.36							80.5234	107.484	78.9005	48.2028	102.342	61.952
88.48							82.5129	107.782	105.635	55.3477	83.8045	65.8997
89.6							85.6615	115.112	92.4457	56.0729	90.1617	68.0934
90.72							88.8688	96.5895	113.25	49.0109	88.9524	65.5871
91.84							91.5402	117.849	103.52	48.7131	91.9784	85.8945
92.96							92.0371	95.9275	90.4461	50.8997	80.9967	64.1567
94.08							81.8911	104.836	97.157	44.9175	107.259	66.8441
95.2
96.32
97.44
98.56
99.68
100.8
101.92
103.04
104.16
105.28
106.4
107.52
108.64
109.76
110.88
112
113.12
114.24
115.36
116.48
117.6
118.72
119.84
120.96
122.08
123.2
124.32
125.44
126.56
127.68
128.8
129.92
131.04
132.16
133.28
134.4
135.52
136.64
137.76
138.88
140
141.12
142.24
143.36
144.48
145.6
146.72
147.84
148.96
150.08
151.2
152.32
153.44
154.56
155.68
156.8
157.92
159.04
160.16
161.28
162.4
163.52
164.64
165.76
166.88
168
169.12
170.24
171.36
172.48
173.6
174.72
175.84
176.96
178.08
179.2
180.32
181.44
182.56
183.68
184.8
185.92
187.04
188.16
189.28
190.4
191.52
192.64
193.76
194.88
196
197.12
198.24
199.36
200.48
201.6
202.72
203.84
204.96
206.08
207.2
208.32
209.44
210.56
211.68
212.8
213.92
215.04
216.16
217.28
218.4
219.52
220.64
221.76
222.88
224
225.12
226.24
227.36
228.48
229.6
230.72
231.84
232.96
234.08
235.2
236.32
237.44
238.56
239.68
240.8
241.92
243.04
244.16
245.28
246.4
247.52
248.64
249.76
250.88
252
253.12
254.24
255.36
256.48
257.6
258.72
259.84
260.96
262.08
