# Supplementary material for: Optical tools for visualizing and controlling human GLP-1 receptor activation with high spatiotemporal resolution
Source: eLife. 2023 Jun 2;12:RP86628. doi: 10.7554/eLife.86628 (PMC10262203; doi:10.7554/eLife.86628)
Supplement: Figure 4—figure supplement 1—source data 1. [file elife-86628-fig4-figsupp1-data1.xlsx]

## Sheet: Panel a (G-Flamp1 +HBSS)
Time (s)	G-Flamp-1 DFF
0	0.010837	2.14113	-1.54317	-0.64421	0.285454	0.548986	-0.73425	-0.33986	0.688927	-2.58706	-0.45921	5.36823	11.6317	9.73806	8.14812
1.21	1.90835	-0.07731	2.11172	1.28967	2.59402	2.60882	0.814044	0.547404	3.97418	-3.42525	-0.89959	6.41247	9.62338	11.3844	11.2805
2.42	1.06048	3.45551	0.618763	2.00868	0.15093	0.825413	2.18797	0.916226	1.90067	0.810849	0.051145	10.2264	10.8	9.22937	11.2316
3.63	3.21236	2.43866	2.5279	-0.08907	-0.4336	3.74136	1.86118	0.168745	3.05958	-1.08413	1.90807	10.3328	11.2804	9.68397	7.08641
4.84	0.614025	0.021907	-0.1014	0.17603	1.71075	-0.20837	-1.04158	-1.98798	-0.15512	5.81023	-1.44523	5.70359	10.8959	9.40219	9.70355
6.05	-1.19997	-1.144	-2.27417	-2.71129	-2.93875	-1.56707	1.69861	0.832304	-0.75443	-1.33641	-0.40919	6.85317	8.75052	7.81313	6.00748
7.26	-1.39066	-1.15802	-2.37807	-1.48737	-2.73437	-0.97752	-0.36292	-1.10552	0.990827	0.697967	-0.47777	6.82715	8.04617	8.55322	7.68061
8.47	-1.91087	-0.50776	-1.11234	0.973572	0.474316	0.151547	0.297166	1.17489	0.202436	0.231386	1.29893	8.28293	5.71401	8.90695	9.74383
9.68	1.83798	0.908166	0.697187	1.65852	-0.14377	-0.36436	-1.40648	-1.09433	-1.20104	-1.75568	-1.61469	7.66662	9.30149	11.7171	9.64058
10.89	-0.66601	0.243953	0.204111	0.004744	-0.69673	1.09956	-1.33094	-0.34998	-1.0855	-1.63133	-0.489	10.2761	8.95629	8.34661	6.10849
12.1	0.483629	0.14235	0.914063	-1.30816	0.449913	0.67118	-1.86145	-0.46337	-1.86456	2.12278	-1.44859	6.42365	8.99733	7.95673	8.06859
13.31	-2.06414	-3.15928	-3.06517	-1.05319	-1.42802	-1.88305	-0.39904	-0.46118	-1.3022	0.091992	0.294654	4.71735	8.27196	7.8784	6.91498
14.52	-1.00042	0.481972	0.372524	0.930283	0.203696	-2.05805	0.80806	0.065409	0.532767	0.482952	1.09195	5.87272	9.04956	8.7833	7.36859
15.73	-2.0209	-0.58376	-0.88235	0.09987	-0.13465	0.432454	-1.05001	0.054387	-2.55484	-0.25669	1.17008	9.54381	9.28283	5.49784	8.22638
16.94	-0.85267	-1.54448	-1.37179	-2.81157	0.341646	-1.19695	0.217096	1.14462	0.992841	-2.41505	0.664214	7.18765	9.14887	7.41919	5.80527
18.15	-0.60429	-1.92827	-0.26462	-0.87422	-1.55057	-1.58884	-0.29848	-0.83037	-0.75041	1.59635	-0.55083	6.48079	6.48688	5.18931	6.73099
19.36	-0.76744	-0.70101	0.433804	0.877118	-0.01264	0.014104	2.57068	-0.31344	0.347911	-1.23535	2.91698	8.37739	8.13759	9.0444	7.99319
20.57	2.88895	0.771958	2.11916	1.26645	1.57082	-1.07015	-0.08771	0.461013	-0.47156	2.33206	-1.12246	6.97026	8.14158	9.37959	8.92198
21.78	-0.2166	0.411665	1.23226	0.183852	-0.40153	0.777687	-0.71584	-0.01199	-2.30674	-0.60572	-0.22905	8.47387	9.19018	7.40975	6.48073
22.99	0.677362	-0.21338	1.76159	1.51029	2.6931	0.04324	-1.16611	1.59301	-0.24375	2.1561	-0.25041	9.55745	8.45724	9.87798	8.67528
24.2	1.20103	0.881949	-1.4332	-0.59111	0.847535	0.828181	-0.43091	2.03544	-1.61208	-2.04164	-1.1767	5.86316	8.47783	6.41073	4.81396
25.41	-0.31187	-0.9368	-0.15739	2.74857	3.46584	0.644464	-0.33	-0.58319	-4.00268	1.5659	-0.60254	7.78038	7.24353	8.66487	8.84761
26.62	-0.20623	0.04599	0.671127	1.53555	1.3415	1.13476	-3.8615	-3.76148	-6.62946	0.99504	-5.24985	6.52899	10.2589	7.24231	5.31022
27.83	0.784559	3.07984	2.67015	4.67246	6.91532	2.41716	-5.56933	-4.2896	-8.41105	-2.34876	-6.12373	9.54563	8.32984	11.2298	10.6512
29.04	1.23502	0.900996	-1.32641	0.382874	-2.17714	3.45814	-7.72786	-8.68786	-13.0786	-7.24816	-8.09026	9.0654	11.0528	4.13847	5.00285
30.25	-3.71695	-5.51242	-3.26515	-3.41651	-3.6157	-3.39288	-10.0276	-6.00322	-11.177	-7.6789	-10.5057	2.03023	2.80361	2.16397	2.48442
31.46	-4.41375	-8.08536	-5.5415	-5.07458	-5.86032	-6.93421	-9.50828	-8.94979	-13.7993	-7.5309	-11.1202	-0.28778	-2.08093	0.044674	0.688984
32.67	-8.81891	-11.5715	-11.2286	-7.067	-9.85099	-11.2562	-12.8037	-9.1227	-15.5622	-11.8935	-12.5844	-2.27772	-2.68498	-7.09328	-2.89582
33.88	-12.1164	-14.4609	-13.7865	-12.7987	-15.4698	-12.4208	-12.7263	-13.1286	-15.9256	-12.311	-13.5039	-7.69019	-9.28417	-10.1692	-6.95075
35.09	-16.411	-20.8715	-16.7745	-12.5446	-17.8534	-17.884	-14.5736	-9.74353	-13.4801	-13.0176	-13.4071	-9.7617	-11.5492	-13.5679	-8.08462
36.3	-17.9171	-20.5935	-18.7183	-18.5999	-19.8712	-17.7885	-12.8719	-12.1446	-20.244	-14.574	-13.7286	-11.8612	-13.0372	-16.007	-13.1485
37.51	-20.8104	-21.3199	-21.8343	-19.0961	-22.7261	-21.3375	-15.2026	-14.1102	-20.8264	-12.5321	-15.8729	-15.8058	-16.725	-17.3317	-13.9613
38.72	-24.4705	-23.7216	-23.8985	-22.0196	-23.3228	-24.1875	-14.6885	-16.3438	-21.6075	-15.6394	-13.6362	-16.5387	-18.3049	-18.4684	-17.9442
39.93	-25.208	-25.0932	-21.3018	-22.3668	-25.0526	-25.1408	-16.6895	-16.0149	-22.3862	-15.4441	-16.3338	-19.4748	-21.9234	-19.3872	-17.8274
41.14	-25.5252	-24.5048	-22.7876	-22.8607	-23.5207	-24.7841	-17.102	-17.3486	-22.8382	-15.7372	-15.7348	-18.454	-22.6775	-17.6743	-19.1316
42.35	-25.4959	-25.8887	-22.849	-23.169	-25.418	-26.3969	-15.8595	-16.566	-22.5175	-16.5825	-15.6994	-19.1977	-21.4873	-19.6331	-18.693
43.56	-26.76	-25.3276	-22.42	-23.8815	-23.6902	-24.917	-15.436	-17.0183	-23.1643	-14.865	-14.1579	-17.1598	-22.5643	-18.515	-20.7252
44.77	-24.3835	-24.4154	-21.4001	-23.4087	-23.4002	-24.1035	-16.8892	-14.5342	-22.513	-15.3437	-16.2045	-16.6156	-22.8504	-18.7928	-19.1718
45.98	-26.5918	-25.676	-21.8644	-22.6115	-24.2424	-25.2454	-18.3725	-18.344	-23.5774	-16.3765	-17.7549	-18.6528	-21.3959	-18.3428	-19.9015
47.19	-26.6807	-23.5155	-22.0085	-23.8656	-24.9316	-24.9649	-17.9247	-18.7412	-24.9786	-16.9567	-18.337	-18.5904	-21.7652	-18.1236	-21.1808
48.4	-26.4967	-24.547	-22.6661	-23.7101	-22.2192	-26.0358	-19.218	-18.8049	-27.3754	-17.5565	-18.3193	-18.1826	-23.242	-16.2352	-21.1409
49.61	-25.1504	-24.792	-21.9889	-22.925	-23.0277	-24.3784	-19.5037	-17.3447	-26.2211	-18.1933	-19.3908	-19.6072	-22.0059	-16.9657	-20.1975
50.82	-25.9814	-25.846	-21.1735	-22.0094	-23.2237	-24.4728	-21.0127	-21.6321	-28.9673	-21.1394	-21.4566	-18.8057	-21.9823	-17.1951	-18.4588
52.03	-26.7624	-26.0613	-22.9463	-25.3796	-25.1122	-25.4299	-22.5864	-19.8893	-28.5922	-18.5675	-21.9326	-18.5399	-21.079	-19.404	-21.6406
53.24	-27.3407	-27.0309	-21.9641	-22.8726	-24.3234	-25.6778	-22.4029	-22.6878	-30.0409	-16.4331	-22.017	-19.6571	-24.0819	-17.3219	-19.6918
54.45	-27.6665	-25.251	-21.6881	-22.4273	-23.073	-24.8211	-22.7335	-21.3881	-29.2714	-20.6767	-21.909	-18.0634	-21.5997	-17.0714	-19.685
55.66	-27.6424	-26.7466	-23.4011	-22.6716	-23.9431	-25.0623	-21.1878	-21.4111	-29.1918	-17.1201	-20.6745	-19.371	-21.605	-17.4002	-20.0475
56.87	-28.0178	-26.698	-21.4532	-24.887	-24.889	-25.4126	-23.3473	-22.9597	-31.0205	-18.6567	-22.8624	-19.2599	-21.9609	-19.393	-22.4862
58.08	-29.2451	-26.8195	-22.8326	-26.6228	-26.138	-27.7339	-23.5392	-20.3526	-29.9348	-19.4121	-22.8962	-19.9146	-24.0083	-20.1692	-24.0461
59.29	-27.6537	-27.67	-22.9605	-25.1918	-25.0534	-26.5922	-25.0533	-20.8182	-31.0162	-19.3824	-25.3009	-20.9813	-24.2435	-21.0421	-23.1426
60.5	-29.7466	-28.5324	-23.5219	-27.6699	-25.7985	-26.6933	-23.6996	-21.7505	-31.0173	-19.4447	-22.9484	-20.3036	-25.3058	-20.8758	-25.7759
61.71	-31.2315	-27.5377	-22.7647	-26.0887	-26.0413	-27.8932	-23.965	-24.1448	-33.7316	-20.705	-23.1586	-21.5247	-27.0244	-20.8869	-25.05
62.92	-29.7866	-27.521	-23.6981	-24.2876	-24.7108	-28.1354	-26.1691	-24.3962	-34.1485	-22.3441	-26.0262	-18.1982	-24.7663	-21.0759	-22.7047
64.13	-30.0258	-27.8351	-23.5196	-24.8824	-25.6888	-26.1741	-26.8489	-27.0314	-33.8593	-24.0073	-26.1637	-20.3736	-25.2705	-20.7777	-23.6496
65.34	-29.0173	-25.6751	-20.8042	-24.8295	-23.3369	-27.4392	-27.9892	-26.8579	-36.3016	-22.9297	-27.8094	-18.8016	-24.8607	-19.7947	-23.0371
66.55	-30.3089	-26.8296	-22.9121	-26.8166	-25.5971	-27.6275	-26.5779	-27.1919	-35.7746	-22.0206	-26.1006	-21.1314	-24.3121	-20.038	-25.7763
67.76	-30.0779	-27.4583	-23.2085	-25.0834	-26.1784	-28.3612	-29.1939	-27.6368	-36.6416	-20.6298	-29.3874	-18.8446	-27.3795	-21.4403	-23.1063
68.97	-29.2112	-27.1322	-21.8408	-24.6333	-24.9755	-28.3352	-27.0566	-27.6055	-36.2658	-22.8799	-28.5926	-20.1854	-25.5156	-20.8175	-22.543
70.18	-31.0841	-29.6978	-23.021	-26.1011	-26.7769	-28.7441	-26.3998	-25.4446	-35.4221	-21.0566	-26.7527	-18.4514	-24.2228	-20.6469	-25.2335
71.39	-29.7003	-29.6733	-23.5441	-27.3807	-26.2434	-28.564	-27.8194	-26.8652	-35.6815	-23.073	-28.0713	-21.4922	-26.4191	-20.3139	-26.3021
72.6	-30.5083	-28.6876	-22.8851	-26.1753	-25.2364	-29.6592	-28.3087	-26.9298	-36.7627	-21.6464	-28.448	-21.0921	-28.6111	-21.5619	-25.2912
73.81	-29.0727	-28.0998	-22.6418	-26.4655	-27.1472	-27.7875	-26.7422	-28.6108	-36.087	-24.5892	-27.5504	-21.6571	-28.3827	-20.9364	-26.1224
75.02	-30.5105	-28.8617	-23.343	-26.5414	-27.0549	-27.3246	-26.775	-27.2663	-37.9873	-20.4416	-26.9923	-21.4831	-25.8918	-21.6249	-25.9741
76.23	-30.2964	-29.02	-23.743	-27.5026	-26.823	-28.2396	-27.3438	-27.5935	-36.4897	-21.8862	-28.1095	-21.41	-26.9806	-21.5777	-27.241
77.44	-32.667	-28.5824	-22.9488	-25.8379	-25.8807	-27.4655	-27.8617	-27.4574	-37.3834	-24.7121	-27.2033	-20.1337	-26.8457	-21.5773	-24.6166
78.65	-30.8423	-29.8905	-23.4721	-26.2575	-27.5884	-29.8252	-28.3643	-27.4803	-37.0895	-21.941	-28.9699	-21.7551	-27.0422	-21.8576	-25.5171
79.86	-30.2646	-30.4788	-24.0042	-26.5159	-26.5926	-28.922	-29.2982	-29.0768	-37.9538	-23.6428	-30.1616	-23.053	-26.8497	-20.9994	-26.7197
81.07	-30.5961	-28.5298	-23.7399	-25.4113	-25.711	-28.7308	-29.677	-29.4723	-39.84	-21.9904	-29.9735	-19.0687	-24.8385	-21.1315	-25.1544
82.28	-30.4939	-29.4846	-23.966	-27.3244	-26.893	-30.0314	-30.0527	-30.9249	-40.8971	-23.9549	-30.652	-21.6788	-25.4704	-23.5475	-25.7311
83.49	-33.1825	-29.5312	-24.1535	-27.9301	-27.8831	-28.8947	-30.1759	-33.2082	-41.8183	-23.1074	-30.55	-21.8224	-25.9499	-23.9551	-27.8451
84.7	-33.036	-30.0623	-25.8798	-26.8394	-27.2994	-29.9593	-32.3775	-34.2294	-41.2759	-23.4665	-32.3517	-22.9962	-27.9061	-22.4301	-25.986
85.91	-32.0645	-29.4311	-23.29	-27.0003	-28.3624	-30.1973	-34.3556	-32.1809	-42.1403	-26.4061	-34.2956	-21.6663	-25.4204	-22.137	-27.3777
87.12	-30.5125	-29.3718	-22.7548	-27.6013	-27.509	-28.5487	-32.9363	-33.9277	-43.4819	-25.5374	-34.044	-21.7761	-26.4422	-22.9334	-28.365
88.33	-30.6443	-30.5353	-24.2329	-27.2812	-27.413	-28.7985	-32.6367	-35.1777	-44.1429	-26.0079	-34.1027	-22.3636	-27.1664	-21.6835	-27.0256
89.54	-30.686	-28.7064	-24.7034	-26.9458	-28.4246	-28.5939	-35.4798	-37.0894	-45.6877	-24.6276	-34.8247	-20.4805	-24.7596	-23.2633	-27.6511
90.75	-31.7819	-31.5093	-23.7784	-25.6812	-28.0719	-29.8413	-35.2915	-35.6023	-46.1945	-24.0435	-36.1326	-23.8656	-26.5746	-20.9397	-26.8102
91.96	-33.2922	-30.6844	-24.2858	-27.4908	-27.9228	-28.8395	-36.0138	-37.5232	-46.261	-25.5507	-36.8625	-22.3047	-25.2952	-22.9135	-27.5348
93.17	-32.1576	-30.5668	-24.162	-28.1753	-28.2205	-30.2531	-37.2255	-35.7698	-46.1045	-24.6559	-38.5096	-24.1237	-27.9143	-24.4412	-28.6355
94.38	-32.8647	-30.401	-25.668	-27.1951	-28.0176	-30.323	-36.2761	-37.3082	-46.1341	-27.2715	-37.5902	-22.8551	-27.3348	-25.5741	-28.1146
95.59
96.8
98.01
99.22
100.43
101.64
102.85
104.06
105.27
106.48
107.69
108.9
110.11
111.32
112.53
113.74
114.95
116.16
117.37
118.58
119.79
121
122.21
123.42
124.63
125.84
127.05
128.26
129.47
130.68
131.89
133.1
134.31
135.52
136.73
137.94
139.15
140.36
141.57
142.78
143.99
145.2
146.41
147.62
148.83
150.04
151.25
152.46
153.67
154.88
156.09
157.3
158.51
159.72
160.93
162.14
163.35
164.56
165.77
166.98
168.19
169.4
170.61
171.82
173.03
174.24
175.45
176.66
177.87
179.08
180.29
181.5
182.71
183.92
185.13
186.34
187.55
188.76
189.97
191.18
192.39
193.6
194.81
196.02
197.23
198.44
199.65
200.86
202.07
203.28
204.49
205.7
206.91
208.12
209.33
210.54
211.75
212.96
214.17
215.38
216.59
217.8
219.01
220.22
221.43
222.64
223.85
225.06
226.27
227.48
228.69
229.9
231.11
232.32
233.53
234.74
235.95
237.16
238.37
239.58
240.79
242
243.21
244.42
245.63
246.84
248.05
249.26
250.47
251.68
252.89
254.1
255.31
256.52
257.73
258.94
260.15
261.36
262.57
263.78
264.99
266.2
267.41
268.62
269.83
271.04
272.25
273.46
274.67
275.88
277.09
278.3
279.51
280.72
281.93
283.14
284.35
285.56
286.77
287.98
289.19
290.4
291.61
292.82
294.03
295.24
296.45
297.66
298.87
300.08
301.29
302.5
303.71
304.92
306.13
307.34
308.55
309.76
310.97
312.18
313.39
314.6
315.81
317.02
318.23
319.44
320.65
321.86
323.07
324.28
325.49
326.7
327.91
329.12
330.33
331.54
332.75
333.96
335.17
336.38
337.59
338.8
340.01
341.22
342.43
343.64
344.85
346.06
347.27
348.48
349.69
350.9
352.11
353.32
354.53
355.74
356.95
358.16
359.37
360.58
361.79
363
364.21
365.42
366.63
367.84
369.05
370.26
371.47
372.68
373.89
375.1
376.31
377.52
378.73
379.94
381.15
382.36
383.57
384.78
385.99
387.2
388.41
389.62
390.83
392.04
393.25
394.46
395.67
396.88
398.09
399.3
400.51
401.72
402.93
404.14
405.35
406.56
407.77
408.98
410.19
411.4
412.61
413.82
415.03
416.24
417.45
418.66
419.87
421.08
422.29
423.5
424.71
425.92
427.13
428.34
429.55
430.76
431.97
433.18
434.39
435.6
436.81
438.02
439.23
440.44
441.65
442.86
444.07
445.28
446.49
447.7
448.91
450.12
451.33
452.54
453.75
454.96
456.17
457.38
458.59
459.8
461.01
462.22
463.43
464.64
465.85
467.06
468.27
469.48
470.69
471.9
473.11
474.32
475.53
476.74
477.95
479.16
480.37
481.58
482.79
484
485.21
486.42
487.63
488.84
490.05
491.26
492.47
493.68
494.89
496.1
497.31
498.52
499.73
500.94
502.15
503.36
504.57
505.78
506.99
508.2
509.41
510.62
511.83
513.04
514.25
515.46
516.67
517.88
519.09
520.3
521.51
522.72
523.93
525.14
526.35
527.56
528.77
529.98
531.19
532.4
533.61
534.82
536.03
537.24
538.45
539.66
540.87
542.08
543.29
544.5
545.71
546.92
548.13
549.34
550.55
551.76
552.97
554.18
555.39
556.6
557.81
559.02
560.23
561.44
562.65
563.86
565.07
566.28
567.49
568.7
569.91
571.12
572.33
573.54
574.75
575.96
577.17
578.38
579.59
580.8
582.01
583.22
584.43
585.64
586.85
588.06
589.27
590.48
591.69
592.9
594.11
595.32
596.53
597.74
598.95
600.16
601.37
602.58
603.79
605
606.21
607.42
608.63
609.84
611.05
612.26
613.47
614.68
615.89
617.1
618.31
619.52
620.73
621.94
623.15
624.36
625.57
626.78
627.99
629.2
630.41
631.62
632.83
634.04
635.25
636.46
637.67
638.88
640.09
641.3
642.51
643.72
644.93
646.14
647.35
648.56
649.77
650.98
652.19
653.4
654.61
655.82
657.03
658.24
659.45
660.66
661.87
663.08

## Sheet: Panel b (G-Flamp1 +uncaging)
Time (s)	DFF G-Flamp1 DFF
0	0.633327	-1.26232	-1.15106
1.21	0.680785	1.92305	0.357531
2.42	0.449025	0.92	-0.28128
3.63	1.03151	2.42046	2.01035
4.84	1.99923	1.54097	0.86184
6.05	0.485213	0.806032	0.135857
7.26	1.95886	-0.01116	0.734772
8.47	3.99085	1.14288	-0.15427
9.68	0.38015	-1.90219	1.29521
10.89	0.056225	1.38815	-2.68115
12.1	1.58817	1.06323	-0.682
13.31	2.33856	1.60817	-1.81756
14.52	-1.25638	-1.73422	0.453496
15.73	0.423636	-1.56719	-0.21679
16.94	-1.41277	-1.52356	-0.67699
18.15	1.52041	-0.92825	-2.11234
19.36	-0.20612	0.841437	-2.04995
20.57	-0.95285	-0.08812	0.252824
21.78	-2.91749	-0.42986	0.067895
22.99	2.86194	-1.31328	-0.49992
24.2	-2.36838	0.880333	-1.05175
25.41	-1.20675	1.03994	-0.37892
26.62	0.937202	1.75806	-0.98075
27.83	-0.7767	2.91408	2.99883
29.04	-1.49445	-0.70319	0.524557
30.25	1.1672	0.632144	0.4035
31.46	1.34788	0.337237	-0.13662
32.67	0.680436	-2.66847	-1.37242
33.88	0.547216	-0.41093	2.66266
35.09	1.0781	-0.11309	-0.62259
36.3	-1.17496	0.019323	2.78936
37.51	-1.55983	-2.20502	0.347061
38.72	-1.2216	0.022509	0.477041
39.93	-1.58022	1.36179	-2.07988
41.14	-1.91827	-0.06755	-1.683
42.35	-2.35669	0.645778	-0.44069
43.56	-0.67851	-2.10046	-0.35222
44.77	-1.60045	-2.58365	2.7419
45.98	-0.98997	0.323463	0.587502
47.19	-0.48354	-1.97655	1.71996
48.4	-14.8193	-18.0939	-20.4498
49.61	-15.7695	-18.1194	-18.2615
50.82	-13.8119	-17.8369	-17.5623
52.03	-13.5941	-16.4098	-15.2654
53.24	-15.0828	-16.3185	-15.1895
54.45	-13.6236	-15.9733	-15.1648
55.66	-13.2099	-13.8296	-18.3964
56.87	-14.1725	-14.1325	-15.8384
58.08	-14.6887	-13.8697	-17.6939
59.29	-13.3221	-15.8103	-16.991
60.5	-12.4653	-15.5988	-16.3577
61.71	-14.1958	-15.749	-17.0064
62.92	-14.7918	-15.7886	-17.6572
64.13	-13.5569	-16.4536	-16.9218
65.34	-14.4603	-15.1068	-16.2239
66.55	-15.2507	-12.6352	-17.5543
67.76	-14.049	-12.122	-19.1559
68.97	-14.2352	-14.2287	-18.8988
70.18	-14.3987	-14.8544	-17.4046
71.39	-13.8112	-16.6752	-15.3792
72.6	-13.632	-15.0358	-14.8819
73.81	-13.6174	-16.0119	-15.4059
75.02	-13.4483	-15.4551	-18.3544
76.23	-12.0224	-16.5223	-17.3506
77.44	-13.7617	-16.0585	-16.0694
78.65	-13.2603	-17.461	-17.4998
79.86	-13.5724	-15.1196	-17.5311
81.07	-13.5325	-15.7409	-18.9162
82.28	-13.5825	-13.433	-16.9279
83.49	-15.1017	-16.1671	-18.2185
84.7	-14.1898	-15.8286	-18.272
85.91	-13.0659	-14.8183	-18.7944
87.12	-14.2364	-14.0142	-16.598
88.33	-15.1443	-14.3376	-17.972
89.54	-14.4705	-14.0962	-18.632
90.75	-13.4564	-14.2048	-17.7459
91.96	-14.1974	-15.898	-18.4149
93.17	-14.1602	-14.7109	-14.4961
94.38	-13.0102	-13.6617	-17.347
95.59	-13.0152	-13.331	-17.5944
96.8	-14.7054	-15.4837	-17.8561
98.01	-14.7245	-14.7857	-18.2088
99.22	-14.9004	-10.8488	-17.5786
100.43	-13.499	-12.6784	-16.3855
101.64	-13.842	-14.2467	-17.3683
102.85	-13.4051	-13.6068	-16.3698
104.06	-12.8818	-15.0309	-14.496
105.27	-14.2657	-13.8881	-14.2956
106.48	-15.0374	-16.0992	-17.4528
107.69	-11.8208	-14.6888	-15.735
108.9	-12.6868	-16.2511	-18.799
110.11	-13.7255	-14.9128	-17.6328
111.32	-12.5115	-13.2604	-17.1659
112.53	-14.6618	-15.037	-15.6349
113.74	-11.3548	-13.5857	-15.7406
114.95	-13.0935	-13.1783	-15.2291
116.16	-13.3933	-12.7027	-13.9259
117.37	-14.2522	-13.55	-20.274
118.58	-13.1653	-13.6026	-19.6086
119.79	-16.1237	-14.2723	-18.7826
121	-14.8956	-14.794	-20.051
122.21	-15.2497	-15.2154	-17.8252
123.42	-14.1432	-15.4804	-18.1055
124.63	-11.4505	-13.2365	-19.1482
125.84	-14.1606	-12.1517	-18.7334
127.05	-11.7777	-13.4773	-18.6854
128.26	-14.3404	-12.4584	-17.3518
129.47	-13.6965	-13.6993	-18.51
130.68	-13.7158	-13.2561	-18.1953
131.89	-14.1778	-12.414	-17.5273
133.1	-13.356	-14.4333	-20.1174
134.31	-16.4591	-12.9708	-17.2302
135.52	-14.9404	-14.5666	-18.6545
136.73	-13.0571	-14.7787	-17.8512
137.94	-15.3011	-12.807	-18.2806
139.15	-14.1933	-14.0652	-18.0041
140.36	-14.6601	-14.2599	-20.0986
141.57	-16.0515	-14.4059	-17.3446
142.78	-15.4632	-14.4861	-17.8839
143.99	-14.7191	-12.618	-17.3814
145.2	-15.5527	-12.4908	-18.3969
146.41	-15.6189	-14.6426	-18.2752
147.62	-14.3407	-14.0252	-17.2283
148.83	-14.449	-16.3569	-18.2078
150.04	-14.0967	-16.3982	-18.3223
151.25	-12.3246	-14.7027	-16.692
152.46	-13.8305	-16.1323	-18.357
153.67	-12.9008	-13.5812	-16.8987
154.88	-13.5404	-14.5159	-13.2509
156.09	-13.6793	-14.3685	-17.5603
157.3	-15.5975	-15.7318	-18.4747
158.51	-12.4652	-16.4428	-15.4732
159.72	-14.0268	-15.8172	-16.6325
160.93	-16.1536	-13.3019	-16.0208
162.14	-15.2471	-15.746	-13.5066
163.35	-16.9074	-15.1423	-17.0648
164.56	-13.6162	-14.0008	-15.5292
165.77	-16.8282	-14.8365	-15.5564
166.98	-15.0412	-13.8482	-15.9197
168.19	-15.3278	-15.6993	-17.9152
169.4	-16.2252	-15.8905	-15.8204
170.61	-15.7034	-13.8112	-16.7587
171.82	-16.238	-15.8228	-16.3347
173.03	-16.1621	-15.0151	-16.2797
174.24	-17.505	-13.602	-15.4075
175.45	-15.8278	-14.9653	-16.4615
176.66	-16.1582	-13.796	-16.0974
177.87	-14.4245	-14.5102	-17.7483
179.08	-15.5118	-14.5537	-16.8534
180.29	-17.2266	-14.2315	-18.2853
181.5	-14.1812	-15.7212	-16.7612
182.71	-14.3855	-14.1526	-16.0484
183.92	-14.6071	-15.8316	-15.5308
185.13	-16.8887	-14.6699	-17.7913
186.34	-14.6744	-15.4976	-17.6467
187.55	-16.0993	-15.6238	-18.5699
188.76	-16.0455	-15.1404	-17.7474
189.97	-16.7622	-13.3452	-16.5937
191.18	-16.4082	-16.7669	-14.9275
192.39	-18.1333	-14.8559	-16.2083
193.6	-17.369	-17.8427	-13.6714
194.81	-14.7009	-16.4687	-14.8384
196.02	-16.7168	-16.3026	-15.5974
197.23	-17.5322	-15.2714	-15.4539
198.44	-17.0935	-14.3773	-15.3304
199.65	-17.9491	-14.0129	-14.5415
200.86	-17.7711	-14.569	-14.9875
202.07	-17.8967	-14.078	-17.196
203.28	-15.5554	-14.8377	-16.0821
204.49	-15.7588	-13.6811	-14.7117
205.7	-15.3535	-12.1778	-16.9871
206.91	-17.6457	-16.2931	-16.2013
208.12	-15.7249	-15.4184	-13.9685
209.33	-16.2924	-17.1114	-15.1017
210.54	-15.0458	-14.9483	-14.3219
211.75	-15.063	-16.6138	-14.3459
212.96	-15.8964	-13.885	-14.069
214.17	-16.1676	-14.5533	-16.0354
215.38	-17.0231	-15.5156	-17.3545
216.59	-17.4161	-16.1935	-18.969
217.8	-17.1158	-15.8383	-17.2995
219.01	-16.7416	-17.4245	-17.2682
220.22	-16.0976	-13.8872	-15.8466
221.43	-17.6199	-14.8164	-15.6557
222.64	-15.1242	-15.8311	-16.1363
223.85	-16.829	-14.9483	-13.4818
225.06	-16.6943	-15.5489	-14.4561
226.27	-15.5019	-15.5993	-15.4688
227.48	-13.0063	-15.1072	-14.7349
228.69	-16.2594	-14.7455	-16.5055
229.9	-16.7016	-13.7482	-16.2348
231.11	-15.8566	-12.9774	-15.1996
232.32	-17.7767	-14.9235	-16.5305
233.53	-18.6468	-14.5162	-17.1329
234.74	-17.4208	-13.2173	-15.7627
235.95	-18.218	-13.5146	-17.9014
237.16	-16.8431	-13.998	-15.8015
238.37	-18.3071	-15.5535	-16.9812
239.58	-17.2403	-14.4799	-15.7726
240.79	-16.5028	-16.6528	-16.3283
242	-18.2649	-16.6687	-14.9837
243.21	-18.2888	-16.4038	-16.9649
244.42	-16.2832	-13.5441	-16.1293
245.63	-16.3053	-13.4098	-18.2909
246.84	-17.1853	-14.4738	-15.701
248.05	-15.6629	-15.691	-16.3908
249.26	-14.653	-17.0341	-18.9045
250.47	-15.5594	-16.7279	-15.1576
251.68	-13.6469	-17.8522	-15.1293
252.89	-15.773	-15.6099	-16.7673
254.1	-15.3942	-18.6568	-17.7167
255.31	-15.083	-16.2711	-17.6058
256.52	-16.3863	-17.0573	-16.4204
257.73	-16.7227	-16.884	-17.6624
258.94	-16.1034	-16.9098	-17.1973
260.15	-16.0842	-14.164	-17.5179
261.36	-14.3126	-15.9993	-16.2516
262.57	-15.9008	-15.9894	-15.2279
263.78	-15.7202	-16.0726	-16.3324
264.99	-16.0599	-16.6091	-16.8507
266.2	-17.5145	-16.237	-16.8931
267.41	-14.1095	-17.6673	-17.7599
268.62	-16.5032	-15.7255	-15.6785
269.83	-17.7414	-16.4713	-15.8768
271.04	-17.3076	-16.2621	-14.2797
272.25	-16.9903	-13.9923	-15.9645
273.46	-15.8805	-16.4818	-16.2242
274.67	-17.3046	-16.3499	-18.0195
275.88	-15.2491	-17.9119	-17.3211
277.09	-15.9422	-14.4554	-16.7768
278.3	-17.106	-15.0924	-18.8467
279.51	-15.6215	-15.5722	-16.2032
280.72	-15.5377	-14.685	-17.4831
281.93	-15.2444	-15.7486	-15.7039
283.14	-14.9719	-14.7061	-15.6416
284.35	-15.7142	-18.2407	-17.7458
285.56	-16.8011	-16.3405	-17.9169
286.77	-16.6875	-15.9171	-13.9962
287.98	-16.8441	-16.2951	-13.9746
289.19	-16.6544	-15.72	-15.312
290.4	-16.0885	-17.6432	-16.6911
291.61	-13.8359	-16.3008	-17.7903
292.82	-16.4981	-16.1422	-14.7152
294.03	-15.6635	-16.2745	-15.9623
295.24	-15.6714	-19.5357	-14.3546
296.45	-16.8559	-16.7016	-13.8227
297.66	-14.4881	-16.2132	-14.8925
298.87	-17.7874	-16.3941	-16.2673
300.08	-14.9833	-17.6399	-15.1995
301.29	-16.9519	-16.4741	-16.1875
302.5	-15.9824	-14.1847	-13.8557
303.71	-14.7528	-15.8796	-16.4149
304.92	-14.3645	-16.8038	-13.6295
306.13	-16.248	-16.3183	-14.3814
307.34	-15.271	-16.7569	-15.0785
308.55	-12.7983	-17.7649	-13.937
309.76	-13.5508	-17.3318	-14.5843
310.97	-15.3914	-17.8233	-13.3351
312.18	-14.5852	-17.911	-15.0675
313.39	-15.4733	-18.0436	-15.7724
314.6	-16.2973	-17.7277	-19.4043
315.81	-15.1683	-17.8961	-16.2858
317.02	-16.2802	-18.5338	-16.2884
318.23	-14.3896	-16.8364	-16.5526
319.44	-13.7466	-17.7589	-13.6122
320.65	-13.1236	-15.8945	-14.4188
321.86	-14.3713	-18.5783	-14.4522
323.07	-17.1199	-17.5604	-13.1389
324.28	-15.6269	-16.3448	-16.4889
325.49	-16.8516	-17.4793	-13.6543
326.7	-15.529	-17.5397	-13.8323
327.91	-14.6002	-17.7823	-13.8114
329.12	-15.6474	-18.5816	-13.2766
330.33	-14.4313	-19.1926	-14.2222
331.54	-16.5269	-18.7995	-17.2275
332.75	-14.7602	-18.0815	-16.0789
333.96	-13.0181	-17.4321	-15.0296
335.17	-15.6786	-18.5363	-16.1003
336.38	-16.6313	-18.5193	-16.5237
337.59	-14.436	-16.9794	-17.7978
338.8	-12.2085	-16.9022	-15.1814
340.01	-14.6104	-16.1335	-15.9546
341.22	-13.645	-15.8558	-15.9582
342.43	-14.1429	-17.4362	-14.2682
343.64	-14.252	-18.8398	-14.5569
344.85	-15.4998	-16.5162	-17.2867
346.06	-15.0972	-18.246	-15.1433
347.27	-15.7315	-17.026	-15.7624
348.48	-16.8168	-17.7058	-14.7617
349.69	-15.6536	-17.5479	-15.8366
350.9	-15.5275	-17.1331	-14.9274
352.11	-15.6953	-17.2167	-13.6299
353.32	-14.8891	-18.9237	-14.9877
354.53	-15.38	-18.5904	-17.8688
355.74	-14.4736	-17.9507	-17.0321
356.95	-16.6013	-17.3829	-14.8937
358.16	-13.9277	-18.2003	-15.8264
359.37	-16.1137	-19.331	-12.7899
360.58	-15.458	-18.5628	-15.5989
361.79	-15.0383	-16.057	-13.6744
363	-16.4848	-18.7402	-15.3319
364.21	-15.3626	-17.8697	-15.4924
365.42	-16.9765	-19.2269	-17.2379
366.63	-17.1453	-17.4201	-16.6615
367.84	-12.9736	-16.2704	-16.8627
369.05	-16.922	-15.9847	-16.739
370.26	-17.3724	-16.5361	-15.7924
371.47	-17.1787	-17.1449	-16.0189
372.68	-16.9144	-17.7914	-15.381
373.89	-13.947	-16.4236	-15.4129
375.1	-15.4912	-17.7396	-16.182
376.31	-15.1113	-16.6353	-15.327
377.52	-15.1768	-19.0688	-16.9307
378.73	-13.627	-18.3192	-15.998
379.94	-14.1022	-18.1162	-15.8178
381.15	-15.0118	-16.863	-17.6519
382.36	-11.624	-17.6045	-17.0105
383.57	-15.2542	-18.8099	-15.0793
384.78	-15.3947	-16.1245	-15.0767
385.99	-12.8227	-18.3312	-16.147
387.2	-15.5174	-16.7738	-14.8327
388.41	-15.4845	-16.8489	-16.0819
389.62	-14.2111	-19.9639	-15.5402
390.83	-12.7439	-17.1772	-13.2085
392.04	-12.8142	-17.5139	-12.5372
393.25	-13.7774	-19.9989	-14.5268
394.46	-15.1497	-17.1159	-14.6386
395.67	-13.2952	-15.4437	-13.6095
396.88	-12.3267	-16.9789	-12.3007
398.09	-12.4561	-17.9254	-15.6001
399.3	-11.4109	-18.8919	-14.6635
400.51	-12.8887	-18.4475	-14.5181
401.72	-13.459	-17.1405	-14.3138
402.93	-13.1791	-17.8527	-14.1915
404.14	-14.0311	-17.6808	-13.3805
405.35	-11.9621	-17.5364	-13.5689
406.56	-13.8479	-16.6725	-17.0055
407.77	-12.3371	-13.9794	-13.3138
408.98	-15.7887	-18.584	-16.2633
410.19	-15.5401	-17.9681	-14.158
411.4	-13.2752	-16.9485	-14.5105
412.61	-15.2831	-17.8518	-15.8368
413.82	-14.3982	-16.1194	-15.4939
