# Supplementary material for: Optical tools for visualizing and controlling human GLP-1 receptor activation with high spatiotemporal resolution
Source: eLife. 2023 Jun 2;12:RP86628. doi: 10.7554/eLife.86628 (PMC10262203; doi:10.7554/eLife.86628)
Supplement: Figure 4—source data 1. [file elife-86628-fig4-data1.xlsx]

## Sheet: Panel c (Timecourse cAMP)
Time (s)	Distant cells																Target cells
0	1.21468	-0.347174	-1.27406	-0.916935	-0.270816	-2.77921	-0.388663	0.265963	0.433187	-0.105879	-2.86456	-1.02756	-1.38754	-1.62398	-0.590642		0.389929	-1.81813	-0.566294
1.21	0.506636	0.242378	1.7785	2.06084	1.09639	-0.703059	-0.585935	-0.370073	0.762591	-1.80289	-1.96899	-1.11146	1.44252	-2.76961	-1.38812		1.26345	0.914235	-0.888422
2.42	-0.205351	0.0442122	0.549048	-0.842324	0.475159	-2.00747	0.536112	-0.440565	0.596434	0.435118	-2.86512	-0.699951	-1.26979	-1.51468	-1.72715		-0.776737	-1.00496	-2.5945
3.63	0.616881	-0.0960747	1.19122	0.283773	-0.243389	0.0206235	1.66301	1.44684	0.459415	-0.645013	-0.943967	-1.25267	-2.67076	-2.00854	-4.09984		0.601536	2.57057	-0.277986
4.84	-1.28318	0.616824	0.672069	1.70582	-0.0984837	0.857045	-0.0574024	-0.653052	-0.893883	-0.922794	-0.578891	0.180722	-2.37899	-2.07726	-2.37834		-0.268253	-1.31466	-0.954422
6.05	-0.033307	1.2069	1.10755	-1.63348	-1.21883	-0.356667	0.445478	-0.0528831	0.316748	-1.05474	-1.6111	1.11775	1.70693	0.207449	-1.49248		-0.452248	0.45939	1.17991
7.26	0.224512	-0.202657	-1.45043	1.50322	-0.137649	-0.612994	0.670153	-0.0381415	-0.795283	-1.44228	2.12191	1.84773	0.904683	-0.0355979	2.39336		-0.0115683	-2.27806	0.513398
8.47	0.325681	1.09609	1.92392	1.20175	0.277973	-0.846299	-0.317695	1.32862	0.142259	1.23526	-0.869724	0.930044	-0.399027	1.02243	1.66809		1.94441	-2.00991	1.68862
9.68	-0.363703	-2.49557	-1.17297	-0.647918	-0.617535	0.578501	0.693136	-1.10312	-0.455087	0.837901	-0.73839	-1.03939	1.34595	-1.39415	-1.29541		-1.2258	1.40119	-0.61933
10.89	1.09073	1.59088	-0.338553	1.01354	0.0609827	-0.389071	0.740797	-0.263596	0.473786	1.45969	0.253801	0.384848	0.97076	-0.25548	0.555081		-1.12828	0.540586	0.97887
12.1	-0.407015	1.08479	-0.141035	-0.451177	1.64897	1.27716	1.46315	1.74266	-0.160973	-0.369432	1.04258	-1.06339	0.0187148	-0.656849	-0.934757		-0.171968	3.12755	-1.22692
13.31	1.03493	0.0345049	1.70991	-1.48341	-0.0457379	1.32366	-0.406663	0.676862	-0.343904	0.501176	-0.887014	0.199583	-0.460789	1.47531	1.267		-1.82522	0.353297	-1.98201
14.52	-1.47611	-0.74668	-1.37982	0.0181016	0.858235	-0.14184	0.984777	-0.943366	-1.06848	-1.05813	0.27827	0.967061	0.25646	0.79032	-0.579547		0.528157	1.97455	-0.0488454
15.73	-0.470526	0.525594	0.254633	-0.959768	0.37256	-1.40292	-2.03167	-0.469802	0.165804	-2.10895	1.05868	0.568573	1.7035	1.23693	-0.25969		-0.436025	-2.09791	1.44429
16.94	-0.222813	0.817635	-0.32627	-1.42737	0.0613953	-0.832026	-1.1077	-0.432596	0.960398	-2.10726	2.63623	0.573365	-1.13843	1.65442	2.77188		0.463675	-1.07809	2.75443
18.15	-3.45474	0.139853	1.30118	0.748198	-0.389741	0.694353	0.564101	-0.454078	1.12957	0.597552	1.15363	1.18545	1.024	2.29287	1.49603		1.35485	0.956914	0.00518474
19.36	1.28709	-0.880435	-1.03361	0.916336	-0.229787	1.12534	-1.00902	0.684403	0.0365587	1.07706	1.45394	1.10363	-1.77488	-0.0552859	2.12954		-0.447455	-0.0722153	0.0437094
20.57	1.94481	-0.875143	-1.02708	0.196444	0.0606632	0.947567	-0.171518	0.235989	0.381176	2.20953	-0.282341	-1.24424	-0.252556	1.82189	0.875315		-0.350248	-1.11139	-0.203487
21.78	-0.743751	-0.837557	0.0302017	0.303684	0.0439375	-0.394309	-0.694963	-0.837886	-1.46041	1.2207	2.3019	-0.376541	1.39429	-0.346572	-0.0863187		0.466763	0.936965	1.57089
22.99	0.414528	-0.918374	-2.37442	-1.58932	-1.7043	3.64162	-0.989486	-0.322174	-0.679909	2.04337	1.30915	-1.24357	0.964974	2.23639	1.67599		0.0810273	-0.449902	-0.817081
24.2	-0.242331	-1.64168	0.590262	0.68429	0.233315	1.34857	-0.119153	0.0541568	0.554153	-0.147036	0.40361	-1.81152	1.53879	0.448015	0.356139		-1.22659	1.10305	0.144385
25.41	-5.17299	-4.93883	-3.49547	-3.24007	-3.44772	-0.890904	0.437154	-0.322562	-0.168017	-0.837085	1.45987	-0.0571143	-1.00068	0.523899	1.10604		-3.77383	-0.042425	-0.577592
26.62	-4.93914	-7.18886	-4.63876	-3.25663	-6.19451	-1.4443	-3.72201	-0.0850434	0.43615	-2.03646	1.79915	-1.95693	-0.590002	2.30222	0.914054		-5.99179	-5.37893	-0.240455
27.83	-4.57296	-2.62844	-2.86481	-3.09066	-4.92289	-3.01108	-3.51627	-4.47977	-0.232559	-0.889259	0.106366	-0.874437	-1.95959	-0.498624	-0.103809		-4.24313	-4.96155	-0.820682
29.04	-2.67616	-3.17035	-2.34192	-2.13187	-1.75883	-4.88517	-4.84696	-7.15966	-5.21388	-6.01279	0.679037	-3.45779	-2.14684	0.751634	-0.992483		-4.92584	-9.93399	-2.87934
30.25	-5.72799	-4.9443	-5.34082	-5.73149	-3.97418	-5.88008	-6.06458	-9.07278	-6.73048	-8.09074	-0.857455	-1.98135	-0.705393	-0.719003	-0.768341		-6.69404	-10.2753	-3.98695
31.46	-6.07979	-7.19927	-6.75675	-3.96648	-5.55595	-7.28813	-6.79816	-9.15908	-6.59005	-8.76893	-0.966973	-5.53487	-6.00247	-2.02445	-2.8129		-7.47944	-12.3793	-4.82256
32.67	-9.38926	-9.53948	-6.78817	-7.27049	-8.98704	-11.6497	-6.19968	-10.8802	-8.03663	-10.3155	-3.95909	-7.86406	-6.9556	-5.15418	-5.26437		-10.1866	-11.9724	-7.2663
33.88	-11.4634	-12.0381	-7.17964	-6.45473	-11.0503	-11.3623	-7.57709	-10.4453	-10.4597	-11.0171	-4.02085	-6.38427	-5.9011	-5.41931	-5.66809		-11.7355	-13.7997	-6.32319
35.09	-11.6723	-11.1721	-8.07128	-9.40875	-11.6022	-11.5607	-8.93227	-11.9367	-11.4488	-11.8023	-2.50437	-6.22003	-7.24981	-6.31503	-4.08743		-14.3536	-14.812	-8.19396
36.3	-13.2037	-13.2926	-11.1117	-9.38165	-13.4487	-12.8922	-10.4858	-11.5508	-11.6385	-13.3157	-5.82134	-9.08733	-8.79812	-6.04215	-7.72092		-14.8958	-16.92	-10.9668
37.51	-14.922	-13.8364	-13.6246	-12.9346	-15.2389	-13.2157	-10.1487	-12.7748	-12.293	-12.4167	-6.57498	-10.6594	-8.97302	-8.53849	-7.0419		-16.7521	-15.8937	-11.4946
38.72	-16.8671	-15.5049	-12.2701	-9.78969	-16.0972	-12.2846	-9.44629	-13.0627	-12.7857	-12.3708	-7.03898	-12.0466	-10.8656	-11.5728	-3.38134		-16.6934	-15.1283	-14.8545
39.93	-16.0228	-14.4821	-16.902	-12.6241	-15.6235	-11.6798	-10.6636	-12.3731	-12.9053	-12.6658	-6.2463	-15.023	-11.7025	-11.9907	-4.29916		-19.5781	-16.8404	-16.0818
41.14	-15.7947	-17.4299	-14.3386	-13.8579	-17.5104	-11.9637	-11.1898	-11.6449	-12.3943	-14.0925	-6.02657	-14.2083	-11.6706	-11.378	-3.73598		-20.3304	-14.7669	-17.3146
42.35	-16.4348	-16.5553	-17.3189	-13.4231	-17.2299	-11.695	-12.2658	-12.0266	-12.8497	-14.0581	-7.85989	-14.4226	-12.4811	-11.6434	-4.4479		-20.9623	-17.5336	-16.629
43.56	-17.0277	-17.5926	-16.4428	-14.0906	-17.9869	-13.6378	-12.4629	-12.3472	-13.5097	-12.1633	-6.28262	-14.2614	-11.4596	-11.9132	-4.81307		-21.7326	-15.9885	-14.0777
44.77	-18.3944	-17.9008	-18.8416	-13.4862	-19.5011	-10.5155	-12.2359	-12.1538	-13.0488	-13.5236	-5.39081	-12.9307	-9.58232	-11.2317	-2.36649		-19.3436	-15.4452	-15.0951
45.98	-16.4665	-17.2958	-15.9236	-16.705	-18.4161	-13.4979	-12.3665	-13.8069	-12.8902	-13.4077	-8.78635	-15.2506	-12.3306	-12.341	-5.7717		-19.082	-17.7823	-16.2236
47.19	-18.4514	-17.4045	-17.116	-13.8942	-18.168	-13.7765	-13.7458	-13.5581	-13.8156	-14.4905	-8.07404	-15.1935	-13.0086	-13.7857	-5.44113		-20.3023	-18.8867	-16.213
48.4	-17.193	-18.4293	-17.3336	-14.9808	-18.7704	-13.2438	-12.4107	-13.2901	-14.4943	-12.2503	-7.15107	-15.2954	-11.457	-13.7454	-5.65135		-21.0052	-15.7298	-17.1963
49.61	-18.2221	-19.8798	-17.6977	-16.794	-19.9819	-10.919	-12.6093	-13.6779	-13.9296	-13.632	-8.41472	-14.9744	-11.2052	-11.4295	-4.25892		-21.4759	-17.5723	-16.5049
50.82	-18.2676	-19.5477	-16.9479	-16.1829	-19.3968	-12.6103	-11.8522	-13.2336	-13.5472	-12.8359	-8.64525	-15.2803	-11.634	-11.9008	-5.43191		-19.9217	-15.9286	-17.0824
52.03	-18.4425	-17.8708	-18.087	-17.2891	-19.2391	-12.7997	-13.5391	-13.1346	-13.8339	-16.0639	-8.32625	-15.0644	-13.8306	-12.0998	-3.99717		-20.6334	-16.8215	-16.9446
53.24	-17.2333	-18.3406	-17.8746	-16.5198	-20.2731	-12.2772	-14.3032	-13.507	-13.8807	-15.4804	-5.39904	-15.5655	-11.4012	-13.6367	-5.70664		-21.0293	-17.9152	-17.635
54.45	-18.6052	-17.7794	-17.6195	-16.6287	-19.0019	-12.567	-13.9873	-13.2344	-12.9167	-15.6869	-8.05257	-14.646	-12.8653	-11.13	-5.22168		-20.4046	-17.4705	-17.1326
55.66	-17.8283	-18.5036	-18.0327	-16.0072	-19.1909	-14.1	-12.9451	-12.7394	-13.9018	-15.2097	-8.2014	-14.9902	-13.3185	-11.2827	-4.99152		-20.4085	-16.6712	-16.7172
56.87	-16.915	-18.1809	-18.0071	-16.2098	-18.9833	-13.0024	-13.562	-13.871	-14.0257	-15.0881	-8.08659	-15.5918	-13.2947	-13.5559	-6.88094		-23.0731	-16.833	-18.5232
58.08	-17.0523	-18.7974	-18.5234	-16.8656	-19.4705	-12.2829	-11.7758	-14.1251	-14.2807	-14.2221	-8.1563	-15.9955	-13.051	-11.0434	-4.96219		-22.2898	-15.0454	-18.3651
59.29	-17.7124	-18.0122	-19.2997	-17.1452	-19.489	-14.0476	-14.343	-14.3812	-15.0641	-16.7158	-9.26951	-15.7241	-12.6288	-11.668	-6.80987		-21.7531	-17.0146	-18.9727
60.5	-19.1891	-19.4313	-18.8807	-16.2026	-20.8532	-14.7892	-15.1653	-14.847	-14.5122	-16.2458	-7.72158	-14.2981	-12.5587	-10.4839	-3.54418		-22.7919	-19.4269	-17.0973
61.71	-17.4003	-17.4796	-17.8909	-17.0871	-18.9488	-14.8038	-15.2561	-15.4786	-13.9965	-15.8105	-6.46735	-14.9979	-12.8237	-9.61222	-5.13067		-21.3665	-18.3801	-15.1978
62.92	-17.5376	-19.4904	-19.0575	-17.308	-21.3934	-15.4217	-13.9996	-15.8891	-16.2115	-14.3303	-8.1082	-17.023	-10.5233	-13.4296	-5.88114		-24.1295	-17.8641	-18.801
64.13	-19.6804	-17.2183	-20.6192	-19.9691	-21.2893	-13.9077	-15.8819	-15.421	-15.9645	-14.3545	-8.23012	-17.273	-13.4007	-10.7783	-4.30837		-24.4609	-18.1656	-19.3422
65.34	-21.3888	-19.4096	-20.9609	-19.302	-21.7935	-15.396	-13.7944	-13.8793	-13.9814	-17.3661	-6.92333	-15.6498	-11.6593	-10.6667	-3.81947		-25.0378	-19.5892	-16.8613
66.55	-20.3849	-19.5177	-20.3151	-16.9657	-20.92	-14.8617	-14.4728	-16.0412	-15.1313	-16.0344	-8.18105	-15.8414	-14.3392	-11.3736	-4.70476		-24.1948	-19.14	-19.9692
67.76	-19.8956	-18.4801	-21.1684	-18.238	-20.899	-14.4162	-14.6875	-14.65	-13.8748	-15.5217	-9.24093	-17.8877	-13.1246	-10.6335	-5.21736		-25.4344	-17.9087	-18.0402
68.97	-18.669	-18.7808	-20.7626	-18.8784	-22.1175	-15.0385	-14.1693	-15.0179	-15.2017	-16.2438	-8.1379	-15.994	-15.0678	-12.084	-6.05978		-25.6949	-19.3371	-17.8898
70.18	-20.6451	-20.5608	-22.1567	-19.8089	-22.5512	-15.7432	-14.4392	-15.4239	-13.7023	-15.7893	-6.39367	-15.8762	-13.8186	-11.1379	-5.75872		-25.1675	-20.5635	-18.6106
71.39	-19.7532	-18.9407	-21.1105	-19.4086	-21.8535	-14.5146	-14.6747	-15.2168	-13.5876	-15.7096	-7.05341	-15.6465	-12.9513	-9.82753	-6.26793		-24.1463	-18.3009	-16.7793
72.6	-20.8769	-18.6467	-21.6794	-19.522	-21.3956	-14.8698	-15.1825	-16.5856	-15.1042	-15.0688	-7.34744	-15.4528	-12.4015	-10.3218	-5.54699		-26.4203	-18.7302	-19.7136
73.81	-20.5583	-20.2758	-21.4034	-20.1891	-22.2675	-13.8898	-14.0118	-16.775	-16.2504	-16.1516	-7.56996	-15.8646	-15.7481	-11.38	-6.28166		-24.8438	-18.9778	-18.4564
75.02	-19.9549	-19.4025	-22.3902	-18.7133	-22.6033	-15.331	-14.0479	-16.9438	-16.0524	-16.9765	-9.81137	-16.9376	-14.6032	-12.6113	-8.04867		-24.4617	-21.4309	-20.0047
76.23	-19.6073	-19.4344	-22.1449	-20.6906	-23.4526	-15.3905	-13.9651	-16.7461	-16.0799	-17.359	-8.79833	-15.8865	-15.3274	-10.8974	-5.0359		-25.1918	-17.4882	-18.9051
77.44	-20.3743	-20.3993	-20.1353	-18.7357	-22.2669	-14.9067	-15.3452	-17.2685	-17.2532	-18.4444	-7.75665	-16.5884	-14.9512	-11.5613	-6.39562		-25.7765	-19.8075	-18.4201
78.65	-20.691	-20.7242	-22.6417	-20.0385	-22.5796	-14.5224	-14.0178	-14.895	-16.1371	-16.7721	-6.61513	-17.2707	-14.7357	-11.9202	-7.72787		-27.3245	-18.0814	-21.211
79.86	-19.792	-19.2917	-21.0514	-19.7213	-22.1231	-14.2515	-14.1904	-15.1507	-16.8792	-15.2394	-8.14737	-16.2345	-13.6781	-11.7906	-4.22545		-25.5607	-19.2852	-17.7624
81.07	-21.2277	-20.1394	-22.4399	-20.4012	-22.4275	-14.7147	-15.0416	-16.5221	-16.9958	-15.788	-7.75198	-16.0848	-14.1154	-11.0733	-5.34259		-25.8125	-19.1372	-18.5591
82.28	-20.7002	-20.2645	-23.6507	-19.2744	-22.8846	-15.0886	-14.1583	-15.8238	-15.6527	-16.6793	-7.95923	-17.3891	-14.0716	-10.0641	-4.75346		-25.478	-19.7169	-18.3595
83.49	-21.5077	-19.3783	-22.6939	-18.861	-22.9816	-14.7839	-13.9014	-15.2924	-17.248	-17.5902	-8.84351	-16.1696	-13.1869	-9.70272	-5.95409		-25.9755	-18.7694	-17.6472
84.7	-20.9678	-20.3012	-22.7538	-20.7289	-22.4567	-16.0662	-15.0673	-16.2995	-16.5589	-17.5289	-7.21486	-16.0277	-12.2308	-9.34103	-3.14422		-26.6938	-20.1964	-17.6973
85.91	-21.177	-22.7004	-23.8805	-21.2665	-23.6895	-15.2809	-13.1114	-18.782	-16.8098	-15.7843	-7.88443	-15.6383	-14.8155	-9.30583	-4.21323		-26.1702	-20.056	-19.5699
87.12	-20.9965	-20.324	-22.3219	-20.3488	-23.0901	-14.8639	-13.0458	-16.3041	-16.571	-16.7106	-8.30164	-17.02	-14.7799	-9.96875	-5.35368		-25.4316	-18.7282	-17.9713
88.33	-20.1803	-20.1676	-22.87	-20.5998	-22.6135	-14.0972	-13.3965	-14.6912	-15.2311	-14.6874	-9.12214	-17.8649	-15.8646	-11.8117	-5.17279		-26.0687	-18.4101	-19.811
89.54	-21.0522	-19.3736	-21.8205	-20.8665	-22.139	-14.9143	-12.7786	-15.0757	-16.4429	-18.5611	-8.78383	-16.9178	-14.2552	-9.4899	-3.50601		-26.4757	-17.9853	-19.4528
90.75	-20.9558	-19.4475	-22.3382	-20.5633	-22.9809	-15.1072	-14.5958	-16.8015	-15.7795	-18.3095	-7.36223	-16.7973	-14.6123	-10.7061	-3.69443		-25.5511	-21.9753	-18.8406
91.96	-20.7225	-19.0401	-22.1037	-20.3948	-22.6063	-14.7938	-13.7574	-16.8989	-14.5963	-16.5536	-7.4175	-15.6391	-15.4573	-8.6266	-3.36028		-25.5985	-18.9978	-17.4592
93.17	-21.0332	-18.2965	-23.2258	-20.9622	-22.8895	-14.6566	-12.0726	-16.7277	-16.8566	-18.3233	-8.47041	-16.424	-13.5793	-10.387	-4.75102		-25.6575	-20.3554	-19.5353
94.38	-20.0408	-19.3776	-22.8653	-22.5622	-22.9525	-14.9957	-13.4004	-17.1494	-15.5154	-16.369	-7.2129	-17.6314	-13.3421	-10.9202	-3.77923		-27.1932	-20.1193	-18.2825
95.59	-19.9929	-19.9677	-24.3078	-21.1828	-22.3762	-15.4458	-13.5524	-17.7246	-16.087	-16.3737	-8.62956	-16.2767	-14.5648	-10.3433	-5.09889		-26.2436	-19.7041	-21.5064
96.8	-20.7054	-20.2174	-23.333	-20.0862	-22.5673	-15.9018	-13.8915	-17.3995	-16.2475	-16.6808	-6.6472	-15.4882	-14.4965	-8.88029	-3.30481		-27.3847	-20.7018	-19.3343
98.01	-19.6501	-21.0949	-22.3888	-22.341	-22.9272	-15.1402	-12.6513	-17.0414	-16.1211	-17.0704	-6.186	-17.2736	-14.442	-10.9035	-4.58272		-26.6017	-21.0987	-17.0418
99.22	-20.3215	-19.8939	-20.8478	-20.9089	-23.5118	-14.8726	-13.0304	-15.6759	-15.7894	-18.5443	-7.30778	-15.8886	-13.601	-10.0238	-2.76194		-26.9248	-20.9275	-19.7295
100.43	-20.6947	-18.6529	-23.6227	-20.8261	-22.5867	-14.9218	-12.8119	-18.5077	-16.402	-16.8759	-6.91398	-15.7014	-15.269	-8.89411	0.190477		-27.6931	-19.9413	-17.972
101.64	-20.4862	-20.0476	-23.2212	-21.0241	-23.2106	-15.5196	-13.861	-17.3574	-15.2373	-18.3861	-8.7372	-16.119	-15.7912	-11.2821	-6.05865		-27.2544	-20.9703	-19.7986
102.85	-20.5592	-20.6372	-24.2763	-22.8595	-23.0546	-14.9165	-13.4494	-18.9304	-17.3744	-17.8595	-6.68687	-14.9138	-15.9762	-8.72276	-2.90973		-28.1319	-20.9512	-16.2859
104.06	-22.7239	-20.6735	-24.2242	-23.3095	-23.6071	-14.8175	-12.8822	-17.873	-17.0605	-16.913	-6.34654	-16.3777	-12.534	-8.17033	-1.25705		-29.1043	-20.722	-17.7076
105.27	-22.5867	-20.4517	-22.9537	-22.7233	-24.3678	-16.1076	-14.1389	-17.5511	-17.7312	-18.5326	-5.80886	-15.1199	-12.8809	-8.1039	-3.35558		-27.4496	-22.1998	-17.713
106.48	-21.3528	-19.6709	-23.4815	-22.8048	-23.7885	-16.2732	-14.1465	-18.4749	-17.7846	-17.3996	-7.04525	-17.1846	-13.7879	-8.74743	-4.56053		-27.678	-22.0505	-19.3358
107.69	-23.7723	-21.5728	-24.6671	-23.2279	-24.0772	-15.7373	-14.0718	-17.4751	-17.4718	-19.6214	-9.14982	-15.6117	-14.4087	-10.4308	-3.64779		-28.2279	-21.1004	-18.9126
108.9	-23.5776	-20.2693	-25.6711	-22.1849	-24.39	-15.5517	-12.7354	-18.1013	-18.6916	-19.7303	-9.26554	-16.3132	-14.7639	-9.28942	-3.95636		-28.0021	-21.5605	-18.4155
110.11	-23.361	-20.8128	-24.1777	-21.2857	-24.2373	-15.2304	-13.8081	-18.1595	-16.9515	-19.1058	-8.07997	-15.1597	-14.4966	-7.00639	-3.64779		-28.8846	-22.6764	-18.8443
111.32	-22.944	-20.6633	-25.1542	-22.1209	-24.5066	-14.8744	-13.2285	-18.295	-16.3676	-17.4545	-8.39792	-15.9559	-13.6514	-8.67005	-3.09288		-28.0958	-20.5575	-18.0958
112.53	-22.879	-20.7335	-23.3496	-22.7914	-25.2526	-13.1655	-13.2037	-18.599	-17.1748	-18.39	-8.21765	-16.3578	-13.9225	-8.54684	-2.50131		-27.1416	-18.8415	-17.5732
113.74	-24.0652	-20.5176	-24.5387	-21.9216	-24.4522	-13.7059	-12.2869	-17.9104	-16.9502	-16.3019	-7.2472	-16.5709	-12.6862	-7.37674	-4.34279		-28.8213	-20.5635	-17.5864
114.95	-23.1257	-19.3332	-25.5995	-24.0664	-25.1116	-15.4193	-12.6162	-17.6635	-16.1829	-19.3019	-8.06435	-16.0445	-13.7504	-9.37216	-2.51429		-30.0572	-21.2497	-16.9427
116.16	-21.7176	-20.282	-24.4867	-22.7983	-24.7133	-14.951	-12.622	-18.3683	-15.8625	-18.0307	-6.73824	-16.0081	-13.9494	-7.89247	-3.66001		-28.7035	-21.9277	-16.3798
117.37	-21.1879	-21.4757	-25.2745	-21.1537	-25.2696	-14.0084	-13.3794	-17.9777	-16.2353	-16.5676	-5.61521	-14.4068	-12.3225	-7.58687	-1.16924		-28.8328	-20.5896	-16.2318
118.58	-23.044	-20.2687	-25.1718	-22.7467	-25.4193	-16.0447	-14.2858	-18.1192	-17.716	-19.1922	-6.86477	-15.2206	-11.8304	-8.38404	-1.43738		-29.0307	-24.1996	-17.3521
119.79	-22.4423	-19.9619	-26.1285	-22.5137	-25.2244	-15.9538	-13.7592	-19.5488	-17.9833	-19.1015	-7.20099	-14.8873	-14.7033	-10.0726	-2.73693		-29.7158	-21.7649	-18.1802
121	-23.9114	-19.4501	-24.7866	-22.2202	-24.9292	-15.6766	-12.8493	-17.9831	-17.4795	-18.8925	-8.09962	-16.9106	-13.9701	-10.1863	-3.02237		-28.4585	-22.077	-19.5176
122.21	-21.2475	-19.5735	-25.0634	-21.1174	-24.4698	-15.8133	-14.7456	-19.5007	-18.3084	-18.3168	-6.95756	-16.336	-14.6828	-8.18137	-3.63876		-28.5091	-22.6127	-17.7697
123.42	-22.7614	-21.4394	-24.7724	-23.068	-26.1971	-15.687	-12.9364	-18.7854	-18.6184	-19.953	-5.83953	-15.9968	-14.6871	-6.8253	-1.54758		-28.6903	-22.9869	-17.6913
124.63	-24.2526	-19.9024	-24.5296	-22.6162	-25.7748	-15.5916	-13.1707	-18.5622	-16.4081	-19.1547	-8.9342	-16.0684	-13.3761	-8.93866	-4.02387		-29.0732	-22.0621	-18.2212
125.84	-23.5999	-19.4907	-24.8519	-23.0649	-24.259	-15.0661	-13.8499	-19.8324	-18.1464	-17.1559	-6.85745	-15.6652	-14.266	-8.25178	-1.81572		-28.04	-22.8333	-16.8451
127.05	-20.0283	-19.9808	-24.7564	-23.5287	-24.6943	-14.1724	-12.5043	-19.0415	-18.197	-19.8175	-6.70046	-14.5434	-14.1681	-7.62665	-1.56487		-28.1245	-20.7456	-17.5941
128.26	-23.3498	-19.8574	-24.282	-22.4242	-25.3621	-15.099	-13.1693	-20.0351	-16.1369	-16.9308	-7.3457	-15.647	-14.2591	-9.38101	-4.32906		-28.2499	-19.5497	-17.1231
129.47	-22.0018	-18.475	-23.8607	-23.6436	-24.8138	-14.2076	-13.0306	-18.8125	-15.914	-19.306	-6.35707	-14.3861	-13.2721	-9.63699	-2.31177		-29.9149	-22.0894	-16.5293
130.68	-23.605	-19.315	-24.2738	-23.9664	-26.1348	-15.3573	-12.2899	-19.0168	-18.847	-17.6125	-5.99771	-13.5616	-13.2108	-8.68915	-0.927985		-29.5043	-19.6553	-16.2828
131.89	-21.6919	-20.1916	-23.7988	-22.1242	-24.5339	-13.5897	-12.087	-19.1431	-16.8763	-19.1226	-7.59729	-15.5942	-13.8154	-8.09922	-4.34147		-28.9196	-18.9853	-16.8114
133.1	-23.244	-20.7325	-23.9573	-22.068	-25.5439	-13.9947	-11.4538	-18.8043	-17.0842	-18.4178	-7.85689	-15.2344	-13.0842	-9.57235	-1.96766		-29.0282	-20.541	-16.4409
134.31	-23.6976	-19.3965	-24.4142	-23.2607	-24.9479	-15.209	-12.8952	-17.8002	-17.7065	-19.1588	-8.43354	-15.4797	-13.145	-7.51308	-1.20064		-29.1135	-21.2479	-17.7385
135.52	-23.9732	-20.2627	-24.2696	-22.9995	-25.0613	-14.9907	-14.3316	-17.9374	-16.9678	-18.7733	-8.04079	-15.1744	-13.2736	-9.80406	-3.50544		-28.5444	-20.9184	-18.1281
136.73	-22.8634	-19.7821	-24.8545	-22.2196	-25.3033	-14.7588	-12.8153	-18.3596	-16.2986	-19.5306	-6.15511	-14.7536	-14.0246	-6.5921	-2.51993		-29.5301	-20.9099	-16.0609
137.94	-23.1676	-18.7431	-24.457	-22.8546	-26.07	-13.5847	-13.4718	-19.0719	-17.8816	-19.516	-6.42587	-15.8206	-13.7429	-9.52173	-0.959951		-28.8237	-21.7674	-16.0118
139.15	-23.7479	-19.5267	-25.4359	-23.7055	-23.927	-12.9819	-11.8902	-19.9815	-17.7723	-18.4723	-6.42587	-14.6607	-12.932	-7.32811	0.579527		-29.055	-22.4651	-18.2856
140.36	-23.5846	-19.3875	-25.3561	-23.4725	-25.6573	-13.9983	-13.4348	-19.4732	-16.794	-18.7237	-6.7577	-14.9367	-13.6593	-9.43302	-2.82737		-29.5022	-23.1399	-17.3447
141.57	-24.6039	-19.7364	-23.6604	-22.5704	-25.6141	-12.8222	-11.2659	-19.3147	-17.7925	-18.5734	-8.06142	-16.5306	-12.7027	-8.89859	-3.10285		-29.2986	-21.7663	-17.3111
142.78	-24.1432	-20.5604	-25.8473	-24.2334	-25.9437	-13.2343	-13.0212	-18.5151	-17.041	-18.5827	-5.63486	-14.2321	-11.2583	-8.58075	0.409542		-30.2063	-21.6846	-15.7005
143.99	-23.7529	-19.6977	-25.7652	-26.5938	-25.7764	-14.1165	-13.5811	-18.6335	-17.3782	-18.8581	-7.04246	-14.9671	-12.4618	-7.53168	-1.16097		-29.8741	-22.4066	-16.0104
145.2	-23.9993	-20.7515	-24.7376	-25.8945	-25.133	-13.4018	-11.9251	-18.7653	-17.8973	-19.505	-7.11977	-15.917	-14.0251	-7.88561	-2.56337		-28.2809	-20.5932	-17.2889
146.41	-22.7533	-18.8422	-22.9807	-26.2093	-25.1975	-13.1754	-12.4906	-18.5158	-17.4797	-18.7455	-7.32256	-14.3405	-13.5394	-8.14288	1.52631		-29.8835	-19.7519	-16.8587
147.62	-24.2735	-21.3021	-24.0161	-26.2736	-25.8359	-14.0475	-12.0076	-19.041	-16.3523	-18.5536	-8.32486	-14.8786	-13.1452	-8.27813	-2.38604		-28.6744	-19.214	-16.6799
148.83	-23.7072	-20.495	-25.7554	-24.7846	-25.3482	-15.5402	-13.1351	-18.4134	-17.6501	-17.9193	-6.6564	-13.4184	-11.5583	-6.02654	1.35162		-30.3872	-21.0176	-16.3053
150.04	-24.545	-21.2998	-25.4684	-25.9519	-25.871	-15.0928	-13.6154	-18.7814	-17.5137	-19.4459	-8.33776	-14.8053	-11.7011	-8.47921	0.333384		-30.2286	-21.5261	-16.9589
151.25	-22.6624	-19.0168	-25.5357	-24.6426	-25.4775	-14.3665	-13.2727	-19.1091	-17.0942	-18.2475	-6.34919	-15.6955	-11.1328	-7.06984	-1.33566		-29.5584	-20.9549	-15.7909
152.46	-22.2575	-20.2271	-24.6032	-23.9095	-23.8691	-14.2244	-13.9268	-18.2955	-17.1347	-20.141	-6.64727	-16.0844	-12.3951	-7.55833	-0.0692102		-28.2848	-22.2711	-17.9488
153.67	-24.5447	-20.5292	-24.9709	-24.2165	-25.2249	-12.6967	-12.9112	-19.1988	-19.034	-18.7669	-5.82232	-14.0598	-12.1421	-7.50522	-0.572215		-30.369	-19.9773	-16.5686
154.88	-23.6023	-21.5802	-24.9314	-23.6612	-25.8012	-14.1207	-13.4481	-19.4198	-16.8671	-19.179	-7.05152	-14.7042	-11.1808	-7.83022	1.41818		-30.2308	-20.4204	-16.514
156.09	-23.6146	-19.5288	-24.9976	-24.3936	-25.3392	-13.0752	-13.0348	-18.693	-17.7547	-17.7848	-6.45006	-14.2373	-13.7565	-8.06054	-1.43362		-28.92	-20.9227	-16.0063
157.3	-22.6254	-18.9686	-23.0081	-23.2508	-25.2585	-13.5082	-14.3145	-18.7998	-16.2853	-17.7748	-6.24274	-14.1609	-13.112	-6.717	0.620521		-28.4603	-22.1917	-14.4928
158.51	-23.3878	-18.4927	-26.3324	-23.4551	-25.7254	-12.4051	-13.246	-20.2359	-16.7055	-20.0189	-6.28108	-15.4232	-13.1625	-5.72729	0.232974		-28.5774	-21.2914	-16.6675
159.72	-22.3758	-20.1045	-25.7655	-23.9269	-25.692	-12.7662	-12.7873	-18.7695	-17.6275	-18.1845	-6.90541	-15.4659	-12.0761	-8.70248	-1.83847		-29.0618	-22.0321	-15.631
160.93	-22.6691	-21.5153	-26.6347	-24.3097	-25.9291	-13.0996	-13.1379	-19.418	-17.9986	-17.9479	-7.07348	-14.0316	-12.4534	-7.64376	0.515029		-29.1616	-21.1232	-14.7413
162.14	-22.0158	-20.8299	-25.0982	-22.2637	-25.7435	-11.4096	-12.6754	-19.6508	-16.8635	-17.571	-5.91189	-14.6335	-11.7274	-7.24885	1.39242		-29.1287	-20.8721	-14.8537
163.35	-23.6315	-19.6525	-25.1331	-22.603	-25.9806	-11.8229	-13.1073	-18.823	-16.0034	-19.0997	-6.59583	-13.4042	-9.99271	-5.03971	1.82322		-30.323	-19.8671	-14.2702
164.56	-23.0642	-18.3296	-24.0391	-22.6733	-25.1422	-12.5812	-12.8204	-20.0356	-16.5326	-18.0009	-6.47132	-14.401	-10.1228	-8.18266	2.18463		-27.8456	-21.0871	-14.292
165.77	-24.5402	-18.4593	-24.0971	-23.3417	-25.9801	-12.7549	-14.171	-19.7087	-15.9472	-18.3006	-4.72333	-13.4825	-11.1557	-5.58011	1.06637		-29.4233	-19.1102	-13.8497
166.98	-24.0379	-19.3356	-23.3226	-22.636	-25.5236	-12.3217	-13.7898	-19.2972	-18.3801	-18.5712	-5.06728	-14.4348	-11.1062	-5.84514	-0.100988		-27.978	-20.7367	-16.8476
168.19	-23.0548	-20.5149	-23.8288	-22.1599	-25.273	-12.5547	-14.0427	-20.3476	-17.1202	-17.8105	-7.39492	-13.2111	-10.4597	-5.19117	2.02179		-29.9691	-21.5028	-15.7332
169.4	-24.8201	-19.4069	-24.2533	-22.0153	-26.4377	-12.744	-12.6177	-20.2835	-17.6031	-17.3832	-7.94529	-14.3358	-11.0346	-7.66911	-0.890753		-28.3939	-20.4348	-18.7078
170.61	-23.0627	-20.8719	-25.9162	-22.421	-26.0056	-12.2565	-12.3997	-19.2713	-16.2774	-16.425	-6.24783	-13.7756	-12.1081	-6.02305	-0.440398		-30.0734	-20.1823	-15.3278
171.82	-23.5353	-21.2934	-24.2575	-23.4051	-25.5042	-11.8286	-13.2001	-20.9203	-18.0193	-18.8619	-5.77651	-14.9572	-10.1654	-9.34471	0.106987		-28.712	-22.5215	-15.3999
173.03	-24.7124	-20.1833	-24.2568	-23.3609	-25.7693	-11.788	-13.1995	-19.5494	-19.1195	-18.5216	-4.84358	-13.3443	-12.0953	-7.69328	2.36966		-29.4683	-21.9523	-14.5599
174.24	-23.2844	-19.7814	-22.7715	-21.6762	-25.6808	-11.9916	-12.8609	-20.0119	-17.5813	-18.5594	-6.37352	-15.0654	-11.9382	-8.59268	-0.362738		-28.0244	-20.9633	-15.6093
175.45	-23.5641	-20.6024	-23.4218	-23.6639	-25.917	-12.4924	-12.7653	-19.7277	-17.3047	-18.0091	-5.54452	-13.7918	-12.8478	-6.92992	0.463699		-29.265	-20.6363	-15.1196
176.66	-21.7159	-20.2666	-25.5936	-22.6338	-24.9279	-12.905	-13.3917	-20.5175	-17.4674	-20.3775	-4.66359	-14.0352	-10.7262	-6.03767	-0.286391		-28.3193	-22.3548	-15.9407
177.87	-23.8729	-18.8311	-25.3199	-21.7025	-25.3537	-12.7265	-13.4099	-18.2066	-17.019	-18.1119	-6.83891	-16.1423	-11.4412	-7.46624	1.32717		-27.6849	-19.5391	-16.2647
179.08	-23.2559	-19.4747	-23.6252	-21.3787	-26.1393	-11.5601	-13.7957	-20.3625	-17.6246	-17.3236	-5.42064	-14.7055	-10.7544	-6.62789	0.121086		-27.2445	-21.3078	-15.072
180.29	-22.6881	-20.6926	-24.3418	-21.326	-24.7063	-11.4805	-12.9936	-19.8492	-18.0974	-18.4549	-7.08994	-14.3168	-10.5929	-8.1041	0.786183		-28.6064	-21.6227	-16.3587
181.5	-23.9773	-20.3416	-23.536	-20.977	-25.6468	-12.5123	-13.9684	-20.0708	-16.689	-20.3958	-5.89217	-15.0247	-12.6685	-8.78283	0.167533		-27.4655	-22.0175	-14.666
182.71	-23.2166	-19.7111	-23.573	-19.8166	-25.756	-11.3052	-14.2355	-19.9241	-16.6823	-18.6806	-7.86254	-16.0777	-9.74634	-6.07019	-1.08331		-28.0209	-21.1662	-16.3372
183.92	-21.8397	-18.114	-21.2324	-22.0108	-24.8235	-11.9111	-13.127	-20.3374	-17.5584	-19.4134	-4.89461	-14.7276	-12.4326	-8.08739	0.351251		-26.8677	-19.4263	-16.2935
185.13	-24.9576	-18.652	-24.3209	-21.1525	-24.6327	-12.2558	-12.2115	-18.9456	-17.8604	-17.774	-4.7929	-14.8163	-10.561	-7.06945	-0.307828		-28.1107	-19.5045	-14.3957
186.34	-21.5724	-18.5497	-22.8885	-20.9593	-25.1729	-11.959	-14.4635	-18.8319	-16.8774	-18.608	-5.51057	-13.0492	-9.44477	-5.09769	-1.66397		-27.4266	-21.5532	-13.2775
187.55	-24.5947	-19.1796	-23.3678	-21.8731	-25.2347	-12.2912	-13.8613	-19.0918	-15.8273	-17.3508	-3.8249	-12.7433	-9.65546	-5.86155	1.53646		-28.3487	-21.5409	-13.7269
188.76	-23.9623	-19.2208	-24.0851	-21.5052	-25.5033	-12.6087	-13.8039	-18.8942	-18.6726	-18.7933	-4.83452	-14.5225	-10.2825	-5.45192	2.06843		-27.7787	-21.7679	-14.6983
189.97	-22.4303	-17.9275	-23.635	-22.3024	-25.7477	-11.1517	-13.1151	-20.6464	-17.5349	-16.8759	-5.26143	-13.881	-10.4002	-6.35968	2.02029		-27.2106	-19.384	-13.3203
191.18	-21.8945	-18.3887	-23.0538	-21.7459	-26.6056	-10.6458	-13.641	-20.0333	-16.7507	-18.1259	-3.72703	-12.628	-8.15715	-5.74609	0.367794		-27.4259	-19.9492	-13.4686
192.39	-21.2773	-18.4934	-20.7503	-19.7066	-24.945	-11.3273	-12.7013	-19.0314	-17.0189	-18.1534	-4.58244	-12.2243	-10.0611	-4.31345	1.35237		-26.3534	-20.9743	-14.4787
193.6	-23.3581	-17.0568	-21.9684	-23.2317	-24.4552	-11.5986	-14.0142	-19.9239	-17.2414	-17.1051	-4.62176	-13.1335	-7.30647	-5.86304	0.254598		-26.1024	-19.915	-13.2054
194.81	-22.4488	-17.8258	-20.978	-20.5208	-25.0983	-12.6639	-14.8094	-18.6833	-16.6704	-20.317	-4.76481	-13.2281	-8.74606	-4.52189	-0.0400595		-27.0115	-21.5631	-13.8268
196.02	-23.0699	-18.1054	-23.5534	-21.9956	-25.4036	-11.8202	-14.0006	-20.2525	-17.1348	-18.8216	-5.36111	-13.2189	-9.64046	-7.11887	0.274904		-25.1113	-20.9462	-13.1483
197.23	-22.2428	-19.2206	-24.1567	-22.4232	-25.2766	-12.2226	-14.1524	-19.021	-15.6097	-17.3414	-4.11761	-12.4702	-9.26439	-4.79726	1.83601		-26.8714	-23.286	-13.9819
198.44	-23.0096	-17.9107	-23.5636	-21.7628	-26.0352	-10.4317	-13.7867	-19.1137	-16.1769	-17.3009	-3.00789	-12.1103	-9.06498	-3.51259	1.15493		-27.2145	-20.3863	-13.1224
199.65	-22.6753	-19.4313	-23.2129	-24.0458	-25.4649	-11.3996	-14.4762	-19.6789	-17.4032	-18.4538	-3.21605	-12.0875	-6.82638	-6.33025	1.42044		-27.5333	-21.0767	-12.4211
200.86	-21.2304	-19.58	-22.4938	-20.2558	-25.7025	-12.8835	-14.5497	-20.2004	-17.1965	-18.7953	-6.23696	-12.2363	-8.33685	-4.94216	2.03928		-26.0908	-21.8946	-12.5502
202.07	-22.9295	-17.3471	-24.1296	-21.3319	-25.4203	-11.924	-14.0336	-21.4249	-17.0935	-17.1503	-6.95316	-12.6085	-7.89676	-6.27088	2.22262		-26.4661	-21.0642	-13.3604
203.28	-21.9311	-17.5883	-22.8924	-21.6541	-24.8043	-10.4106	-14.1277	-19.4895	-17.1381	-19.4798	-4.10486	-12.7073	-8.19342	-7.06964	1.6553		-26.0807	-21.2812	-12.9658
204.49	-22.8973	-17.7332	-22.1662	-21.0108	-24.8301	-9.84067	-13.2439	-20.0245	-15.6598	-17.6103	-4.98405	-12.2415	-7.17471	-5.3124	1.17185		-24.4324	-19.8435	-12.3312
205.7	-22.6544	-19.135	-23.1759	-20.8924	-25.2802	-10.4491	-13.2396	-20.1927	-16.8194	-18.684	-4.65285	-12.2005	-7.46167	-4.77001	1.96181		-26.538	-19.1848	-13.488
206.91	-22.6881	-19.0653	-22.4538	-20.4096	-25.5684	-11.6275	-11.4149	-19.8728	-16.8064	-17.6373	-5.16425	-13.3095	-7.17471	-5.10366	1.93906		-26.4522	-18.9829	-14.2224
208.12	-23.0548	-18.9082	-21.1242	-22.3631	-24.7902	-11.2006	-13.6402	-18.3849	-16.3497	-18.3461	-5.28094	-13.3364	-6.25394	-5.35924	0.263433		-26.4426	-21.0736	-15.5847
209.33	-23.0603	-19.6203	-24.8646	-21.4149	-26.45	-11.0264	-14.4169	-19.1162	-16.6079	-18.1561	-6.62956	-14.398	-7.47853	-6.84628	0.773398		-26.9256	-21.4406	-14.3869
210.54	-21.5926	-17.3591	-21.7202	-21.9348	-26.0612	-9.69841	-14.0141	-19.8756	-16.4919	-19.0617	-5.40301	-13.5172	-8.82665	-6.65564	-0.990792		-25.966	-19.8146	-14.5413
211.75	-21.7209	-18.648	-22.9896	-20.848	-25.6079	-11.1584	-14.6277	-21.1636	-16.3379	-17.85	-5.51601	-13.5152	-8.9989	-5.24796	2.1993		-25.5507	-20.2053	-12.5679
212.96	-20.3176	-17.7002	-22.4624	-22.1169	-25.6582	-12.4403	-14.4581	-19.0928	-16.838	-18.4162	-4.51963	-12.9033	-7.30294	-5.53516	2.74443		-25.5455	-18.7285	-14.0229
214.17	-20.709	-18.5518	-23.3118	-21.5151	-25.2394	-11.2163	-14.4033	-20.0436	-17.6255	-18.1044	-5.94096	-13.8108	-7.58304	-4.90257	1.48607		-25.4548	-20.0138	-12.9927
215.38	-21.1563	-18.1301	-22.1528	-21.3441	-25.9869	-11.257	-15.2912	-19.7054	-16.7183	-18.2948	-3.19422	-12.6763	-7.1904	-4.82759	1.92232		-25.4711	-21.0012	-12.142
216.59	-23.8378	-18.9861	-21.4645	-19.68	-25.9603	-12.0217	-15.4386	-19.556	-19.0732	-18.4527	-6.20077	-14.938	-6.76491	-7.22329	0.81345		-26.8483	-19.3572	-13.5505
217.8	-21.5399	-18.4941	-22.8025	-22.631	-26.3898	-9.35651	-12.7947	-21.0598	-17.9187	-18.8819	-6.44609	-12.4907	-7.37804	-4.30519	0.610368		-26.0979	-19.4751	-13.1537
219.01	-21.5967	-19.0856	-22.9238	-22.1403	-24.9069	-10.7487	-13.6403	-20.1938	-16.6869	-16.4277	-5.29307	-12.6324	-8.03989	-6.75569	2.16546		-25.408	-18.522	-11.8946
220.22	-21.6948	-17.2857	-22.0709	-20.7535	-26.0485	-10.5768	-12.9545	-20.6335	-17.3193	-18.9178	-6.94452	-13.8416	-7.52167	-7.26694	-0.619976		-25.5778	-17.7688	-13.9997
221.43	-22.4924	-17.508	-22.0208	-21.1007	-25.4349	-9.77437	-13.9282	-20.6335	-16.7865	-18.6657	-4.91656	-13.29	-6.57453	-5.49012	2.86628		-25.7127	-17.3494	-10.117
222.64	-22.4245	-18.6584	-21.4089	-21.1917	-25.9619	-10.6858	-14.9438	-19.6546	-17.7363	-18.3461	-6.06589	-13.4964	-6.67648	-7.39414	0.00882692		-26.136	-20.1825	-10.5404
223.85	-21.9311	-19.388	-20.7946	-21.452	-25.509	-10.9265	-13.8787	-18.6246	-16.2925	-16.884	-6.36815	-13.5071	-6.57972	-7.23025	0.671669		-26.3597	-19.0721	-14.2482
225.06	-20.1967	-18.1537	-21.3343	-22.0886	-25.2355	-9.47684	-14.6854	-19.9998	-17.6063	-18.4276	-4.05104	-14.2559	-4.3572	-7.37574	0.436809		-24.3888	-19.7002	-11.2549
226.27	-21.9369	-17.9361	-22.0091	-22.2567	-24.8481	-10.5592	-14.4709	-20.8192	-16.7622	-19.2196	-5.08199	-12.9522	-5.46719	-5.83808	2.55075		-25.8551	-18.5707	-12.5904
227.48	-20.0127	-19.9052	-23.7198	-22.0785	-26.0022	-11.8798	-15.4537	-19.9513	-17.7702	-18.641	-4.99674	-13.2097	-6.19061	-5.29917	0.911045		-27.1019	-20.8976	-12.0018
228.69	-22.6741	-18.288	-23.189	-21.4192	-26.2506	-11.0922	-15.0204	-19.6467	-17.7979	-18.4632	-4.44853	-14.3826	-6.25982	-6.05527	2.19197		-25.7239	-20.8172	-11.0112
229.9	-22.0631	-18.373	-22.1625	-21.4259	-25.434	-11.9085	-16.5735	-20.3997	-16.2525	-20.221	-6.9043	-13.2517	-5.25336	-6.50836	0.883401		-24.3866	-21.1057	-11.3076
231.11	-20.9089	-18.4517	-21.95	-21.2671	-25.547	-10.0706	-15.5962	-19.064	-17.3577	-19.0558	-5.64407	-13.6651	-5.44375	-4.71024	1.4321		-25.5885	-20.9265	-10.9384
232.32	-21.4887	-16.8451	-20.9514	-21.0378	-25.937	-11.9314	-14.4203	-19.7809	-17.9524	-17.1755	-7.25027	-12.6985	-5.13131	-4.09118	2.07877		-24.3279	-21.3505	-13.7517
233.53	-21.475	-16.4844	-21.4709	-22.3686	-24.9406	-11.6954	-15.4847	-20.9235	-18.1735	-18.8527	-6.13162	-12.9866	-5.81355	-5.59453	-1.71662		-25.246	-19.0581	-13.5542
234.74	-22.1437	-17.1625	-21.7814	-20.7232	-25.1326	-9.03423	-13.9261	-19.1546	-17.1086	-17.0184	-8.86533	-14.5435	-5.79875	-8.21071	-3.7262		-23.8441	-17.7706	-14.351
235.95	-20.2199	-17.1821	-21.818	-20.6898	-24.2192	-11.1911	-15.2178	-19.1407	-16.1322	-20.0284	-6.62057	-12.5185	-6.15659	-6.53034	-1.59176		-23.4997	-18.8684	-12.4482
237.16	-21.7352	-16.8456	-22.1812	-22.1491	-24.0204	-11.0865	-14.9507	-19.3395	-16.2914	-20.054	-6.1593	-13.0654	-5.09405	-6.2126	0.400514		-24.0088	-18.6321	-10.7556
238.37	-21.3444	-16.6236	-20.4101	-21.9792	-24.21	-11.211	-13.3133	-19.6258	-18.2332	-17.266	-5.44741	-13.2603	-4.60984	-8.19927	0.625409		-24.9151	-19.3455	-11.1248
239.58	-22.4188	-18.7732	-21.5612	-19.4056	-25.8958	-8.94791	-14.9445	-20.3648	-17.25	-19.0512	-7.87076	-13.9852	-6.68932	-7.69238	-0.342243		-22.9588	-20.7458	-23.5343
240.79	-20.4811	-15.4249	-21.1144	-22.7521	-23.8738	-10.8866	-14.8734	-20.2666	-17.3189	-20.9036	-6.71991	-14.5549	-5.22513	-7.56946	-0.786203		-24.7276	-18.0741	-23.2161
242	-20.7699	-17.5786	-21.4327	-22.1292	-25.5401	-10.4377	-15.3407	-21.7305	-18.6625	-20.7687	-7.33964	-14.7622	-4.8069	-8.54724	-1.10286		-29.1741	-25.4513	-23.6284
243.21	-20.2291	-15.9642	-21.4625	-22.4379	-23.8347	-12.3057	-15.9749	-19.6315	-16.8324	-20.8439	-7.43598	-13.8995	-5.8109	-7.24437	-0.212494		-28.2043	-25.1923	-22.4476
244.42	-21.1837	-17.994	-21.4695	-21.7615	-25.0708	-11.9057	-15.2278	-20.3256	-17.2669	-20.1107	-8.183	-14.3594	-2.78291	-7.0774	-1.37421		-29.7372	-25.89	-21.0491
245.63	-22.2928	-16.6125	-21.4477	-19.9642	-25.1044	-9.96492	-16.2785	-20.0966	-17.6718	-19.8421	-6.96439	-13.7729	-3.57025	-8.157	-1.10136		-28.1927	-24.5707	-21.5575
246.84	-22.1629	-17.3707	-22.6356	-22.2765	-25.1864	-10.9483	-14.8543	-21.1928	-18.4043	-17.3988	-6.55797	-11.9229	-4.34642	-7.31458	-0.753483		-27.7914	-24.6036	-21.0404
248.05	-20.0115	-17.8509	-19.9482	-21.3212	-25.988	-9.39766	-14.4068	-19.2117	-16.7834	-18.9445	-6.59994	-14.0547	-6.28806	-5.71347	-1.60793		-26.3321	-23.3196	-19.5555
249.26	-20.7723	-17.0519	-20.5175	-21.9979	-24.8284	-10.4172	-13.8807	-18.8869	-15.7123	-19.6461	-7.06916	-14.0444	-2.90732	-7.15636	-1.16811		-26.5115	-21.4205	-18.7719
250.47	-19.5284	-16.4505	-19.7558	-20.6756	-24.1419	-9.47472	-13.773	-18.4089	-16.6186	-18.5306	-7.67878	-12.0628	-1.88489	-8.00316	0.653995		-23.1076	-21.8727	-19.209
251.68	-20.03	-17.6511	-20.976	-21.3899	-23.9604	-9.34984	-13.719	-18.1811	-16.1217	-19.6232	-6.13539	-13.2793	-4.18132	-6.94812	-0.893197		-23.7532	-21.4574	-17.3133
252.89	-22.0913	-17.0203	-21.2649	-23.1163	-25.5655	-10.5224	-15.5838	-19.7144	-16.8789	-20.3556	-6.29495	-13.5561	-3.68662	-7.0416	0.856511		-24.902	-23.9914	-15.3874
254.1	-20.4309	-17.5829	-21.171	-20.913	-25.8997	-12.8239	-15.317	-19.3329	-17.1349	-19.6175	-8.87341	-14.2604	-3.78348	-8.46171	0.329626		-21.7744	-23.7504	-16.2845
255.31	-21.8907	-18.547	-22.1304	-22.0762	-25.9574	-12.1572	-16.2579	-20.8713	-17.2772	-19.8158	-6.57031	-14.3388	-3.57662	-6.86468	1.58009		-22.3577	-24.5039	-16.1426
256.52	-21.4583	-17.7473	-21.3024	-22.9595	-25.8055	-12.2116	-16.0667	-20.2637	-17.9942	-20.5709	-6.74794	-12.999	-4.63308	-7.12016	1.05903		-22.111	-22.1187	-15.6598
257.73	-20.0225	-17.7683	-21.2796	-21.0359	-25.8305	-11.5775	-15.844	-20.4304	-18.1222	-20.6405	-5.01437	-12.3344	-3.34163	-8.09803	0.37532		-19.1595	-20.9285	-13.744
258.94	-22.2969	-17.7131	-22.0521	-22.8975	-25.9268	-11.48	-16.3875	-19.9208	-17.5258	-20.0987	-7.38007	-11.1672	-3.31428	-6.85444	0.290511		-15.7892	-21.8392	-11.9921
260.15	-21.1681	-17.0295	-21.6667	-22.4603	-25.4476	-11.1518	-14.8481	-21.1174	-17.9497	-18.2416	-6.10255	-12.8989	-2.27841	-8.64599	0.338272		-16.0346	-22.7811	-12.3633
261.36	-21.6673	-17.6005	-19.2773	-22.1199	-26.2842	-13.2521	-14.7155	-20.3544	-18.4501	-21.305	-6.33901	-12.715	-1.22372	-8.92225	0.730336		-14.587	-20.2732	-13.8483
262.57	-20.9808	-18.1375	-20.5436	-21.4523	-26.4716	-10.214	-14.1413	-20.6628	-16.9269	-18.8783	-7.91336	-14.1507	-3.75976	-9.71993	-1.31798		-11.7611	-18.5534	-11.5252
263.78	-20.2418	-15.8401	-22.0116	-21.2367	-25.5715	-10.6015	-14.0896	-17.5957	-15.0501	-17.6674	-8.48059	-12.927	-2.30763	-8.78552	-0.19538		-10.2362	-17.2943	-9.27812
264.99	-20.6338	-15.6953	-19.9156	-23.1104	-24.5425	-10.8362	-14.5	-19.2955	-15.2409	-19.2122	-6.24156	-13.2345	-2.92703	-7.29787	-1.78921		-11.7912	-17.3601	-9.30343
266.2	-20.7939	-17.901	-20.568	-22.2552	-25.5911	-9.50787	-12.4112	-20.057	-15.9159	-18.2445	-4.37826	-12.7154	-3.33398	-7.57454	0.839586		-9.25682	-14.3351	-6.91689
267.41	-21.3528	-18.516	-22.1522	-21.5761	-26.0436	-10.0964	-13.4397	-18.7745	-16.9111	-18.9002	-7.7991	-12.0405	-2.02939	-6.72843	-0.989474		-5.46133	-16.4938	-5.83576
268.62	-22.124	-17.5396	-22.2431	-24.214	-25.0563	-12.2219	-14.3224	-20.4336	-16.1113	-19.7592	-5.52849	-13.0309	-2.83095	-7.26506	-0.346943		-5.48917	-17.0543	-7.1441
269.83	-21.6967	-16.2899	-21.5421	-22.5124	-25.7085	-9.49572	-14.5362	-19.3813	-16.6635	-18.1871	-6.29593	-12.8098	-3.16143	-7.22916	-0.717571		-2.64389	-14.3042	-6.31022
271.04	-22.1464	-16.6033	-21.6628	-24.1091	-25.8816	-10.5858	-13.9198	-19.9455	-16.4707	-18.0526	-4.95525	-12.038	-2.23037	-6.55083	-0.481392		-1.98364	-14.6057	-4.82305
272.25	-21.4002	-16.2968	-20.312	-23.2662	-25.7398	-10.3369	-14.1269	-19.3923	-15.2057	-17.6076	-5.9151	-11.0719	-3.80456	-7.77503	0.738799		1.73068	-14.0788	-2.73978
273.46	-20.9498	-16.5458	-21.0671	-23.749	-25.2268	-11.2394	-13.9701	-18.3123	-16.616	-19.079	-4.83361	-12.7848	-1.17735	-7.9413	2.56335		1.49428	-14.3113	-1.98728
274.67	-21.1576	-18.1781	-21.8343	-22.3571	-26.2081	-10.9989	-14.133	-18.1492	-15.8942	-18.9417	-5.60266	-11.8668	-1.53018	-8.00913	0.412175		3.81457	-13.0374	-2.70075
275.88	-22.8519	-16.5222	-21.2208	-22.8309	-25.4556	-12.029	-14.1341	-19.0771	-14.4018	-18.7269	-5.96711	-12.908	-4.60514	-8.3024	-1.31328		4.73575	-10.9611	-0.0323454
277.09	-19.3591	-17.8613	-21.1939	-25.4978	-25.2887	-8.39958	-13.5549	-18.6058	-16.9653	-17.931	-4.90862	-12.7124	-1.80518	-8.61625	0.345798		8.3997	-10.7073	-1.39694
278.3	-21.7037	-15.9619	-20.7392	-22.6323	-25.6195	-8.85612	-13.5319	-17.7136	-15.7882	-15.934	-6.55728	-13.0061	-2.17861	-9.48961	2.70155		9.87181	-9.13079	-2.42081
279.51	-18.6038	-18.0886	-21.0259	-23.0204	-25.7283	-11.1695	-14.1277	-18.6362	-14.8046	-17.42	-6.51008	-13.0646	-3.68251	-7.37733	-0.383798		10.991	-10.3628	0.631753
280.72	-20.9454	-17.1611	-21.3869	-23.208	-25.5453	-12.4219	-14.4082	-18.4895	-16.4605	-17.1249	-5.90862	-12.0555	-3.24957	-7.31796	0.934548		10.8124	-9.80714	1.94971
281.93	-20.282	-17.496	-20.3059	-22.7066	-26.2582	-10.6142	-12.9953	-18.4376	-16.5322	-16.3427	-5.16439	-12.3482	-1.81057	-8.31453	0.326994		14.9035	-7.90162	4.08131
283.14	-20.5419	-16.1407	-18.9676	-23.2478	-25.1252	-11.3707	-12.1332	-18.1738	-16.4814	-17.9064	-5.66672	-11.5728	-2.75595	-7.53446	0.0263174		17.4208	-8.77431	2.67229
284.35	-22.0386	-15.8391	-19.73	-23.122	-26.0338	-11.2685	-14.3368	-19.3273	-16.9497	-17.8066	-4.8875	-11.5077	-0.0406987	-7.20718	0.774528		18.752	-7.66716	4.78504
285.56	-21.4675	-16.4105	-19.7067	-23.337	-25.479	-10.5535	-13.6154	-18.46	-14.5474	-16.9653	-5.25362	-10.9526	-1.94665	-7.22807	3.05037		17.8818	-6.58392	5.08025
286.77	-20.8789	-16.2755	-20.1636	-24.0443	-26.7015	-10.1582	-14.3914	-19.0594	-15.9531	-16.7304	-5.59171	-11.4207	-2.2938	-8.80889	1.11525		20.1853	-6.82605	6.688
287.98	-21.5916	-17.5082	-20.6486	-22.4543	-26.4007	-12.1057	-14.7149	-18.4135	-17.8181	-17.934	-3.30967	-12.7358	-2.28684	-7.58329	0.273962		19.3641	-6.04881	7.34087
289.19	-19.7515	-16.0817	-20.3106	-22.2092	-26.0699	-10.7752	-14.3484	-18.021	-15.3345	-17.3254	-5.66282	-12.7898	-1.57342	-8.28708	0.354072		22.9046	-5.40113	6.72131
290.4	-20.1581	-16.6841	-17.5604	-23.3795	-24.9793	-11.9428	-14.0265	-18.2994	-16.4384	-17.8112	-5.08882	-12.2365	-2.35331	-8.13861	1.30611		27.3765	-6.89356	6.92012
291.61	-22.6361	-17.0722	-18.9544	-24.0875	-25.1729	-12.0132	-13.5351	-18.7601	-15.4345	-17.9569	-5.2663	-11.8697	-2.30889	-8.97824	2.90972		26.7078	-6.2034	9.4783
292.82	-22.1351	-17.6481	-22.1945	-24.5171	-26.2688	-11.5438	-13.8928	-18.5606	-16.1285	-17.8109	-3.69077	-12.4466	-1.59558	-8.85195	2.43341		28.1056	-5.13245	8.90055
294.03	-20.6703	-17.5216	-19.2777	-23.2881	-25.9956	-12.3182	-14.6012	-17.2833	-15.5111	-19.5033	-4.8472	-13.3535	-2.06566	-6.70865	0.68671		30.7868	-2.83161	9.53668
295.24	-22.128	-17.1089	-18.9588	-24.4949	-27.1772	-10.0314	-13.676	-19.7261	-16.0319	-17.7338	-4.2318	-13.6846	-2.71909	-8.6265	1.91499		28.9916	-3.11521	9.94377
296.45	-21.0729	-18.334	-20.4475	-23.8327	-26.2045	-11.3458	-14.308	-18.7493	-16.4269	-18.1324	-3.20043	-12.3172	-2.284	-8.09654	0.981179		32.2128	-2.08866	10.4644
297.66	-18.902	-14.6503	-18.7603	-25.4304	-25.7429	-10.9189	-12.8996	-17.209	-16.5039	-17.7159	-3.31287	-12.3557	-2.00489	-7.87845	1.02217		34.7601	-0.389188	12.4492
298.87	-19.291	-14.8458	-18.9825	-24.5859	-26.0166	-11.6339	-13.9854	-17.9022	-14.6463	-18.3776	-4.32765	-11.9632	-1.73528	-10.0576	1.6271		35.3666	0.415925	11.3265
300.08	-19.8819	-15.8869	-20.0926	-24.5678	-25.7454	-10.8223	-12.8859	-17.8012	-15.2583	-17.066	-5.8265	-12.768	-1.34205	-8.31692	-2.33039		35.8058	1.34563	12.387
301.29	-19.9266	-15.931	-19.805	-24.4127	-27.0678	-10.7832	-12.8854	-16.2173	-15.3725	-17.5145	-5.3379	-13.5963	-3.45378	-9.80694	1.49904		37.8351	1.20009	13.0486
302.5	-20.7223	-16.6141	-20.8991	-24.6213	-26.9044	-10.5142	-12.3992	-18.1345	-15.5282	-16.9931	-3.29203	-14.4205	-3.56594	-8.91221	-0.14574		34.4608	4.65222	16.4077
303.71	-21.8289	-16.1114	-21.5222	-24.9849	-26.6655	-9.9705	-12.4764	-17.4861	-14.5145	-17.7431	-5.25327	-12.8387	-0.088047	-9.84772	1.73729		39.0266	4.82352	15.0691
304.92	-20.4455	-15.9301	-21.1867	-23.8541	-26.3699	-10.8951	-12.4988	-18.0743	-14.1872	-17.6564	-4.13232	-13.0067	-1.14979	-9.23144	2.36309		42.0707	4.69338	16.424
306.13	-19.3704	-16.0912	-20.2075	-24.5298	-25.2641	-9.87296	-14.2333	-18.4547	-15.352	-16.1395	-4.27035	-13.4002	-2.87017	-9.311	-1.08744		45.605	4.52901	17.6265
307.34	-21.3482	-16.4618	-20.5836	-24.5489	-26.2613	-11.6473	-13.1135	-19.0945	-12.8311	-15.8827	-3.11713	-13.368	-2.60615	-8.12488	-0.889063		42.1248	3.25802	18.9736
308.55	-20.5497	-14.7943	-20.9354	-22.2146	-26.4014	-11.1832	-14.7868	-17.8371	-15.3885	-17.6913	-2.20922	-11.5768	-2.21498	-8.77269	1.55677		46.6546	5.52015	18.8182
309.76	-21.0517	-17.0106	-20.3143	-25.8236	-27.3126	-10.3367	-12.824	-18.8305	-13.7513	-16.5571	-4.98181	-11.2786	-2.51419	-7.89416	2.09174		49.9816	7.53878	20.8623
310.97	-21.1275	-16.2552	-21.0136	-23.8305	-26.4575	-11.0395	-12.8868	-17.6838	-15.4135	-15.6178	-4.44818	-11.9807	-1.1243	-9.45818	0.181449		45.9665	4.20861	19.5656
312.18	-20.8587	-16.9998	-19.6513	-24.6001	-26.3513	-12.0286	-13.1303	-18.0783	-13.511	-14.7851	-3.95651	-13.7753	0.0894966	-9.90858	-0.897709		49.7573	7.84518	20.5396
313.39	-21.689	-16.0371	-20.9005	-25.9465	-25.9977	-11.0716	-13.1799	-17.4689	-14.0511	-16.9985	-4.33672	-11.8207	-1.3947	-8.09256	2.27358		48.2352	3.66894	19.6078
314.6	-19.6193	-14.7973	-19.4168	-24.8683	-25.7611	-10.8876	-12.5613	-17.4672	-13.5801	-16.5741	-3.53567	-13.2895	0.336651	-8.75369	0.694607		52.2014	9.22101	20.743
315.81	-20.6821	-15.5829	-19.7012	-24.9007	-25.7793	-9.56933	-13.4593	-18.7801	-13.3961	-14.9228	-1.44686	-10.5443	-2.88174	-7.12971	-0.494743		53.1998	10.9345	22.0713
317.02	-21.5329	-14.6381	-19.8418	-25.72	-25.5853	-11.4467	-12.8992	-17.6054	-14.7663	-15.3026	-2.38753	-10.981	0.576647	-6.39986	0.296529		53.952	13.233	23.9551
318.23	-20.1154	-15.1062	-19.7128	-24.6504	-26.9073	-10.2052	-13.4295	-17.0256	-13.2668	-17.3053	-2.29357	-11.6453	-2.97085	-8.66121	-0.786957		53.7995	9.41095	20.7479
319.44	-19.2329	-15.2082	-21.0529	-25.6491	-26.9654	-10.1814	-12.846	-16.5889	-12.933	-15.2651	-2.6983	-11.5839	-1.89645	-8.27535	-0.907114		53.8902	9.69138	23.8083
320.65	-20.8721	-16.6767	-20.8337	-25.3247	-25.5173	-10.8951	-12.1424	-17.3901	-13.2411	-15.5029	-1.84435	-10.0299	-0.967547	-7.6537	0.00224805		57.0993	14.627	25.5369
321.86	-20.2289	-13.4858	-20.2615	-25.1572	-27.1015	-8.29438	-11.505	-16.6294	-13.0187	-14.9142	-2.98621	-10.3435	-3.64682	-7.98227	1.35331		56.826	13.0864	25.5123
323.07	-20.4782	-17.0259	-20.7679	-25.3471	-27.1468	-9.51943	-11.8323	-17.3077	-13.509	-14.3496	-2.86568	-11.7497	-4.21397	-7.1488	1.00751		55.6227	15.4313	27.2747
324.28	-21.6789	-15.1145	-20.6004	-27.303	-27.1521	-10.3235	-10.9835	-17.7806	-11.4647	-15.4702	-2.3876	-11.9376	-0.573141	-9.00321	-1.478		56.5595	13.6546	25.6615
325.49	-20.3736	-16.7443	-19.5317	-26.5347	-26.6799	-8.37817	-12.3131	-16.4918	-13.9723	-15.7814	-1.30068	-12.3683	-2.72576	-9.06834	0.793332		56.3548	15.159	27.9956
326.7	-20.419	-15.9988	-19.0653	-27.4915	-26.4576	-9.55678	-11.8381	-17.9003	-13.6053	-16.4581	-1.09684	-8.82795	-0.702354	-7.98476	0.900326		59.2001	14.0681	29.951
327.91	-20.3537	-14.6393	-19.7986	-24.7629	-26.918	-10.4064	-10.8365	-17.3899	-13.6263	-14.4219	-3.0921	-12.3518	-2.80085	-9.84931	-0.458825		59.8625	16.5388	24.45
329.12	-21.0405	-15.1482	-18.2704	-26.908	-27.1484	-10.0131	-11.7931	-18.2986	-13.5847	-17.4081	-1.50214	-10.5887	-2.97281	-9.37375	2.08704		64.6815	16.5521	30.6357
330.33	-19.3143	-15.8731	-20.5873	-26.7661	-27.002	-11.0517	-11.9075	-17.6491	-13.1146	-14.1118	-3.01953	-11.5752	-2.64987	-10.4377	-1.74351		61.0496	15.2953	27.3301
331.54	-20.4984	-16.0881	-19.6753	-25.1154	-26.3629	-8.45327	-12.8321	-16.0882	-12.851	-12.3269	-2.17443	-11.3277	-1.89792	-9.06377	-1.96389		65.1423	17.7392	26.5642
332.75	-20.019	-15.4417	-18.2873	-25.6964	-26.6721	-10.4784	-11.8007	-17.6379	-12.7399	-14.5681	-2.29761	-10.7984	-2.61037	-8.88267	0.570128		66.3603	14.4171	28.6959
333.96	-19.2009	-14.8573	-19.0558	-25.9355	-26.6217	-8.9322	-12.9203	-18.4289	-13.4475	-15.9652	-1.37743	-11.9587	-3.42584	-9.32213	-1.01129		69.1281	20.2048	31.5409
335.17	-20.3162	-15.735	-20.1666	-25.9333	-26.5267	-11.277	-11.4421	-17.3713	-13.2253	-14.3933	-1.16976	-11.8677	-4.03279	-10.3789	0.0438023		68.043	16.8929	27.7207
336.38	-19.8246	-16.1101	-18.7513	-25.9408	-27.4431	-9.40571	-12.2402	-16.9959	-13.3031	-14.7334	-3.03201	-11.2468	-1.32882	-11.2074	1.16772		72.2226	16.5659	30.4792
337.59	-20.9604	-15.5947	-19.0124	-25.162	-26.5744	-10.6024	-11.1911	-17.8857	-15.2158	-16.0634	-2.3158	-12.0469	-3.44927	-12.5872	-4.36742		73.444	20.7098	29.3294
338.8	-20.2741	-15.0978	-18.9385	-26.4877	-26.2042	-8.40182	-11.244	-18.6619	-12.1908	-14.5727	-3.05215	-11.606	-3.53104	-10.5068	-0.706099		70.9071	21.852	28.0343
340.01	-19.6357	-16.5363	-20.1846	-25.2173	-27.5974	-8.03403	-11.6246	-17.7712	-12.9992	-12.4023	-3.84386	-12.0513	-4.12936	-11.8213	-1.25517		73.127	21.3458	28.9775
341.22	-20.8315	-15.4657	-19.2295	-25.9738	-25.7464	-10.0731	-10.7601	-17.5393	-13.9189	-16.0739	-3.03068	-12.8986	-5.0516	-11.6637	-1.23994		74.8236	21.4677	29.955
342.43	-20.1817	-14.4503	-19.204	-25.7817	-26.495	-10.0213	-11.7232	-16.4143	-12.3871	-14.8864	-0.911201	-11.3413	-2.31331	-10.0072	0.0612928		74.1509	22.405	31.1077
343.64	-20.1521	-16.511	-17.0548	-25.3645	-26.5596	-11.1299	-12.183	-17.9405	-12.9519	-13.0491	-1.42622	-10.5767	-3.24986	-11.5087	1.92101		75.1925	23.523	31.6891
344.85	-22.3623	-16.6109	-19.7151	-26.3422	-26.8162	-9.99813	-11.0288	-18.0285	-13.6206	-14.1338	-0.184329	-9.13842	-1.24107	-8.64271	-0.254053		73.451	24.688	35.0488
346.06	-19.9134	-15.912	-19.0317	-25.7842	-27.902	-9.63142	-12.6441	-18.1459	-12.9694	-14.6415	-2.10081	-12.2123	-4.62592	-10.2254	-1.93381		72.7299	23.3766	35.6896
347.27	-20.2558	-15.4615	-20.6522	-26.5376	-27.2771	-10.1949	-11.4367	-18.605	-13.3085	-14.6904	-2.35038	-11.3667	-3.26869	-12.2328	-1.03554		72.2001	22.6099	28.4817
348.48	-22.2976	-17.1382	-19.3163	-25.3011	-27.1164	-10.5111	-13.2126	-18.0971	-12.6248	-14.5927	-2.48297	-10.1427	-3.2781	-12.2192	-0.289966		74.6168	25.1633	30.3088
349.69	-21.3403	-15.351	-18.2293	-25.4081	-26.8241	-8.80507	-11.6691	-16.7809	-11.7177	-13.9623	-0.902486	-11.8473	-3.9925	-11.5421	1.09118		76.1417	25.1572	34.0079
350.9	-21.012	-14.3722	-20.9195	-26.4305	-27.2951	-8.32114	-12.3905	-17.2362	-12.7086	-14.3789	-2.61862	-11.8176	-5.08406	-10.7995	0.141397		79.8553	29.1918	32.8662
352.11	-21.242	-13.1172	-18.846	-25.2696	-26.6206	-10.2054	-10.9728	-17.9873	-11.5762	-14.2566	-0.977427	-11.2551	-3.35879	-10.1786	0.773775		79.6902	27.7501	36.014
353.32	-21.284	-12.9178	-19.0595	-26.4472	-27.361	-8.71697	-10.9774	-16.7035	-12.4554	-14.4255	-2.66101	-10.9956	-2.57095	-10.8841	0.857642		78.1612	29.7736	33.9749
354.53	-22.1429	-16.9187	-20.4178	-24.2593	-28.2152	-9.37354	-10.8889	-17.2874	-14.0969	-15.8183	-1.52947	-12.9385	-5.70443	-11.6164	-0.295984		78.9914	27.9329	32.7526
355.74	-21.9453	-15.0575	-19.6341	-26.1173	-26.3489	-10.9544	-12.5392	-18.3086	-12.7759	-12.032	-3.81758	-12.5442	-5.63816	-12.5039	0.515029		82.235	26.1975	31.5043
356.95	-20.5629	-14.1431	-19.4914	-26.0636	-27.3738	-10.4874	-11.5383	-19.3397	-11.854	-14.1735	-2.66847	-12.6492	-4.55602	-12.9639	-0.00978899		78.4102	27.3848	33.526
358.16	-20.3282	-15.5352	-19.3107	-27.0477	-27.8247	-8.8682	-11.3873	-18.8512	-12.5682	-15.2365	-1.40329	-12.3514	-5.79571	-11.0368	-1.40899		77.5725	30.6222	31.7254
359.37	-21.4803	-15.936	-20.5386	-26.0536	-27.1582	-9.4971	-12.9251	-17.5795	-13.1811	-14.6818	-0.77429	-10.8096	-4.38671	-11.5923	0.761366		80.8085	26.1338	35.3149
360.58	-18.4165	-15.6386	-18.6309	-24.752	-26.9554	-11.3468	-12.9122	-19.3348	-12.7816	-15.9542	-3.7165	-11.9259	-7.08059	-12.4376	-0.42498		81.7507	26.3431	34.0097
361.79	-21.8311	-15.4417	-19.4208	-26.8038	-27.0752	-9.17972	-12.3249	-18.3728	-12.7423	-13.5447	-2.63745	-12.6582	-5.71796	-10.2625	1.56862		81.9832	30.0227	31.8796
363	-20.1755	-14.8994	-20.1187	-25.6181	-26.7096	-10.4406	-12.1562	-19.0678	-12.5793	-14.4692	-3.93518	-11.7426	-5.41003	-12.4379	-0.8806		83.118	31.2755	31.033
364.21	-20.937	-17.0591	-20.733	-25.7555	-28.1784	-10.805	-13.1518	-19.2886	-13.4684	-14.6875	-2.93253	-13.009	-4.11358	-11.8641	0.0155991		81.1075	29.8284	32.3189
365.42	-18.9945	-15.8034	-20.1467	-26.5254	-27.7093	-9.86766	-10.9169	-19.8131	-14.0956	-12.1806	-2.3708	-13.0937	-5.14219	-12.9074	-0.755927		86.8425	31.5647	33.7005
366.63	-19.6796	-15.2531	-18.8398	-25.0921	-26.3054	-8.85082	-12.335	-17.1618	-12.9061	-13.6677	-2.56906	-12.0071	-7.90293	-13.1619	-1.29918		83.9546	31.5289	33.8976
367.84	-21.5567	-14.571	-20.1431	-25.9939	-26.206	-10.886	-11.0157	-19.2283	-13.5758	-14.3051	-2.66589	-11.2358	-4.5025	-12.5537	-1.54099		87.8165	29.8525	38.337
369.05	-21.2203	-13.8082	-18.7423	-25.097	-26.114	-10.0084	-12.516	-17.7745	-12.6068	-14.351	-2.51977	-12.4843	-6.31208	-12.2914	-0.576161		87.7087	31.8018	33.5883
370.26	-19.5538	-15.843	-20.985	-26.6873	-26.57	-11.3437	-11.1802	-17.9285	-13.2009	-13.9875	-2.676	-11.1771	-7.87519	-12.281	-1.70816		85.0615	34.2268	32.5473
371.47	-18.7062	-16.4948	-20.2625	-25.6571	-26.9781	-8.40845	-11.8245	-17.6381	-11.8509	-11.0457	-3.33511	-11.0086	-5.62649	-13.4753	-1.03912		87.458	32.716	33.6259
372.68	-19.9165	-15.0717	-22.1099	-24.5624	-26.2346	-10.329	-12.9537	-17.667	-12.4035	-11.9397	-3.83968	-11.4166	-9.06831	-13.5698	-1.29654		90.2446	31.8193	33.5619
373.89	-18.9275	-14.6875	-20.3117	-27.5188	-26.1151	-9.22961	-12.0572	-18.6242	-11.9453	-13.862	-5.81458	-13.4796	-6.75658	-14.0202	0.0150336		87.3396	32.6735	31.8645
375.1	-19.329	-16.1885	-20.8517	-26.1056	-26.0824	-11.5562	-12.7847	-19.5395	-13.6288	-14.0039	-3.02141	-12.2582	-4.90269	-14.031	-1.32043		87.6969	32.1368	35.0345
376.31	-20.0225	-13.3667	-19.9726	-28.0573	-27.4069	-9.96463	-10.5607	-17.2676	-11.6607	-11.5735	-3.93469	-12.17	-6.22609	-12.9538	-0.592144		88.619	37.285	34.4262
377.52	-21.0414	-14.7119	-21.4679	-25.9649	-26.1093	-9.5878	-12.0707	-19.3534	-10.864	-11.8843	-5.24511	-11.8751	-6.20012	-13.1677	0.333761		86.1019	33.8701	35.7388
378.73	-18.726	-13.9623	-19.461	-26.591	-26.1401	-8.12496	-10.8058	-17.2359	-12.4419	-10.9969	-4.50046	-12.7026	-7.87254	-14.3996	-3.0643		89.0158	37.3743	33.1735
379.94	-20.3161	-14.9513	-19.565	-25.949	-27.0272	-11.2048	-10.2036	-17.5408	-12.2091	-11.7888	-3.23347	-12.2922	-7.96852	-14.0376	-0.397148		91.263	37.07	33.4459
381.15	-19.715	-12.54	-19.5913	-25.6188	-26.4084	-8.29761	-11.6222	-17.9491	-12.4385	-11.8108	-4.43926	-13.2868	-9.12399	-15.5487	-1.83622		88.7819	38.0981	34.3835
382.36	-20.1692	-14.4669	-19.8995	-26.4687	-26.1515	-9.66117	-10.9421	-16.6435	-12.4098	-12.8489	-2.96536	-14.2168	-7.72833	-14.4124	-1.70045		90.9608	37.4025	36.8136
383.57	-17.7518	-15.1391	-18.7295	-25.4327	-25.0823	-8.82625	-11.7836	-17.5147	-9.70859	-9.27453	-3.52291	-13.1952	-6.45854	-16.017	-1.5094		92.4228	38.3352	37.9248
384.78	-19.9179	-13.1172	-20.7256	-25.9485	-26.5056	-9.10162	-11.2084	-16.7254	-11.5399	-11.0069	-2.53887	-13.1829	-8.18254	-14.4413	-0.532351		91.4608	38.1135	37.1036
385.99	-20.5066	-15.2589	-20.0087	-25.2976	-26.5381	-9.41832	-10.6983	-17.744	-11.0293	-12.2795	-2.80775	-13.9523	-7.41863	-13.3023	-0.363115		91.7483	41.8448	38.08
387.2	-20.3344	-13.7996	-20.1991	-26.7705	-26.394	-8.97789	-10.3622	-16.532	-10.3005	-11.7226	-3.14989	-13.4966	-9.88026	-15.0151	-0.39057		91.3563	42.0009	37.4217
388.41	-20.2099	-14.8409	-21.0349	-26.1411	-25.8369	-10.196	-10.1497	-17.9228	-11.8635	-9.70678	-2.53302	-12.7269	-7.41245	-14.0805	-0.15157		91.671	42.5257	36.691
389.62	-18.5415	-13.7369	-17.9315	-25.4955	-25.3646	-9.57272	-10.6679	-17.9581	-10.9522	-11.3592	-0.62518	-12.6604	-6.73227	-13.8503	0.365539		95.8557	41.6741	40.9268
390.83	-19.2088	-13.2052	-20.5714	-24.4477	-24.7355	-10.7584	-11.2613	-16.4572	-9.96333	-11.7268	-3.37722	-13.3885	-8.36744	-14.6086	-1.53498		92.4263	45.1389	38.125
392.04	-19.2783	-15.7793	-20.5907	-25.3255	-25.4659	-7.82926	-10.4677	-17.7847	-11.4382	-12.458	-2.51294	-15.1332	-7.95156	-13.9953	-0.963149		89.6856	41.1074	37.2187
393.25	-19.9471	-13.4751	-21.0651	-27.0387	-25.3227	-9.82174	-11.5675	-16.9796	-11.1322	-10.8035	-3.68366	-12.4411	-8.37057	-14.8974	-1.4214		94.1957	40.856	40.4037
394.46	-19.1107	-14.0784	-20.0433	-27.0974	-25.3792	-10.5652	-9.35964	-17.9096	-12.8666	-14.1398	0.154187	-12.9167	-6.1557	-14.0571	-1.03385		97.3393	42.4609	40.9637
395.67	-18.4523	-14.5811	-19.742	-25.6665	-25.4835	-11.0779	-11.8187	-16.8884	-11.553	-11.1238	-1.21507	-11.8736	-7.60813	-12.7636	-3.18051		93.3919	44.802	42.8325
396.88	-20.8764	-14.3055	-22.1138	-27.172	-25.5761	-9.68005	-11.6885	-18.5398	-11.953	-12.2473	-0.703393	-12.612	-7.24981	-14.2613	-1.80275		89.8458	41.7399	37.7771
398.09	-20.1254	-12.9227	-20.2985	-26.7914	-24.8719	-10.995	-11.1465	-16.3829	-11.7307	-9.40342	-0.124447	-11.9957	-8.37852	-13.2183	0.311011		93.1395	41.9285	43.3877
399.3	-19.7582	-13.7616	-21.308	-27.5705	-25.597	-9.86991	-10.8597	-17.7418	-12.2365	-9.27808	-1.32019	-12.4152	-7.14951	-14.1697	0.518981		90.8869	44.567	42.8131
400.51	-20.9414	-13.5499	-22.4384	-26.5843	-25.6987	-10.0409	-12.0918	-18.6221	-12.3841	-12.5235	-0.246858	-12.468	-6.98344	-12.6366	1.16903		93.0379	40.8975	39.6769
401.72	-19.0195	-13.4101	-22.4404	-25.5353	-26.049	-8.85284	-11.2256	-18.1171	-10.2109	-11.0552	0.680569	-11.4974	-7.94313	-13.282	1.37061		93.1642	42.6623	43.3046
402.93	-20.7937	-15.0325	-21.8982	-25.6338	-25.5209	-11.3415	-11.3987	-17.72	-11.8866	-11.908	-1.22901	-13.1199	-7.08422	-13.4021	-1.79353		92.4498	43.4613	41.7596
404.14	-20.4311	-14.5867	-21.4292	-27.5436	-25.7276	-8.44401	-9.43279	-16.0592	-10.7391	-10.9602	0.142474	-11.8473	-6.7954	-13.3993	0.146285		91.5455	42.9863	44.019
405.35	-20.5117	-14.2832	-20.8022	-26.5493	-25.7782	-9.9076	-9.95438	-16.3732	-11.747	-11.7778	-0.607751	-12.5513	-9.12007	-12.5801	-2.00244		91.9103	45.4517	42.6546
406.56	-20.6242	-12.697	-21.0201	-28.2196	-24.8125	-9.42424	-10.6069	-18.1128	-11.2978	-11.586	-0.493564	-12.3485	-6.22129	-14.2362	-1.18691		92.0057	46.3102	43.8977
407.77	-19.0381	-15.5209	-22.4406	-27.5066	-26.6812	-9.33406	-12.1393	-16.2196	-11.2278	-12.5557	0.437908	-11.1278	-6.97932	-14.1786	2.83469		88.7095	43.1998	44.4598
408.98	-20.9171	-14.6217	-21.5239	-26.1088	-25.3203	-9.14341	-11.0643	-17.0539	-11.6445	-11.3936	0.386463	-10.9591	-5.2217	-14.0812	0.299727		92.1249	46.716	44.2227
410.19	-19.0458	-13.2959	-22.181	-27.7567	-26.1717	-8.87966	-11.1886	-15.7542	-12.0452	-12.9484	-1.42183	-11.9268	-6.58874	-14.8373	0.238987		89.7348	46.237	42.409
411.4	-19.0412	-15.1398	-22.6897	-27.8114	-26.0806	-8.94152	-11.0932	-16.9349	-10.0023	-11.8327	0.927487	-12.0323	-7.00766	-13.1272	2.46444		93.8445	47.8192	41.1948
412.61	-20.3301	-13.0487	-19.8361	-27.3026	-25.4521	-10.4259	-10.4035	-17.4693	-10.9497	-10.7525	0.151258	-12.4074	-7.67372	-14.9818	0.22056		96.4435	47.8367	43.8279
413.82	-19.108	-12.946	-18.4035	-26.0163	-25.5424	-8.79989	-11.4661	-17.65	-10.3438	-9.04502	0.529857	-11.8489	-5.98728	-14.2013	1.68201		98.6023	49.7778	44.8748
415.03	-18.7887	-12.9331	-21.8175	-26.0492	-26.0273	-8.63334	-11.0912	-17.1878	-10.0392	-11.0645	-0.439189	-13.7382	-7.95146	-15.2726	-0.583498		96.3081	45.961	42.5546
416.24	-19.1443	-14.39	-21.2176	-26.5091	-25.1474	-9.53641	-11.2306	-18.5118	-10.782	-12.2134	-0.609213	-12.2281	-8.05195	-13.8628	-0.148938		98.3985	45.8192	42.8186
417.45	-20.7483	-13.4779	-21.9698	-26.2522	-24.994	-9.31657	-11.06	-18.5819	-10.8666	-8.95626	-0.502487	-12.7503	-8.23607	-14.5891	1.984		93.2489	48.959	43.7811
418.66	-20.0184	-14.921	-21.5774	-27.2444	-25.6615	-9.66509	-11.1145	-16.7715	-9.31297	-11.8291	0.557672	-13.2243	-8.74939	-15.5099	-2.42309		89.6727	49.884	42.1001
419.87	-21.2408	-12.976	-22.9585	-26.123	-25.231	-9.04557	-12.1153	-17.1468	-9.69835	-11.4737	1.31912	-13.8806	-8.47616	-15.7307	-1.22885		91.9311	47.812	41.5917
421.08	-19.3447	-13.2767	-23.8011	-24.9031	-26.1155	-7.91006	-11.199	-18.0723	-9.61262	-12.7658	2.71584	-12.2776	-5.79424	-12.2568	0.696491		93.4344	51.4106	45.3753
422.29	-19.8242	-15.5257	-22.0084	-25.8873	-26.7675	-9.05576	-11.5173	-16.2775	-9.35989	-10.9807	3.81608	-11.1731	-6.54579	-13.5958	2.96839		93.5213	48.3218	46.3336
423.5	-19.5419	-13.0955	-22.4521	-25.3166	-24.8358	-7.13965	-9.95747	-16.6271	-11.2899	-11.6397	1.44662	-13.3856	-6.55168	-14.2788	0.220748		91.9542	48.7087	44.2463
424.71	-17.9119	-9.79834	-21.3408	-26.8161	-24.7331	-9.7502	-10.6797	-16.0477	-10.0383	-10.5074	-0.07321	-12.7485	-7.68068	-14.7939	-0.690304		91.7254	47.6225	41.9139
425.92	-20.882	-13.9751	-23.7605	-25.6305	-25.6763	-8.8632	-8.96619	-16.1951	-9.38802	-9.61379	-0.199527	-12.9463	-6.20806	-14.3257	-0.759502		93.128	52.3981	45.3536
427.13	-21.4197	-14.2088	-21.4878	-24.1925	-25.3064	-6.96891	-10.069	-17.3831	-9.65322	-10.6372	0.675761	-12.9914	-7.57166	-13.994	1.33959		90.7625	50.9051	42.8524
428.34	-20.6006	-13.1527	-23.1902	-24.5551	-26.0289	-7.48161	-10.3382	-16.5485	-9.54529	-8.47082	0.331667	-13.1805	-8.44989	-14.793	-0.0836862		91.7123	54.5538	39.6019
429.55	-19.1693	-14.1174	-21.2623	-25.1634	-24.4035	-9.25695	-11.1675	-15.6969	-9.29485	-9.93527	1.25771	-14.9213	-8.96419	-15.184	-0.434003		91.405	51.9899	41.8873
430.76	-20.056	-10.9183	-21.6674	-24.9728	-24.7227	-6.76852	-11.2091	-15.9417	-8.49142	-10.1558	0.676876	-13.3484	-7.65872	-14.5345	2.12277		93.5801	51.6119	41.8156
431.97	-20.3924	-13.3019	-22.8457	-25.7401	-24.72	-8.13687	-11.317	-17.154	-8.44629	-10.7515	0.954325	-13.9821	-7.64706	-13.9415	0.836205		93.0362	53.5382	44.2799
433.18	-19.9398	-13.87	-22.1976	-24.4815	-25.325	-10.7119	-12.0723	-16.1529	-12.5918	-11.949	2.78513	-11.7816	-7.17853	-12.4229	0.0107108		90.1455	47.8659	43.863
434.39	-19.7352	-12.9183	-22.2138	-25.4433	-23.5447	-8.67645	-10.8388	-18.2729	-11.1808	-11.7874	-0.0992105	-12.8487	-8.28518	-14.9515	-2.2719		91.8188	52.7874	39.3664
435.6	-21.0852	-11.5825	-22.3645	-24.3722	-25.591	-9.80096	-13.2382	-18.181	-9.96176	-11.7021	3.10531	-11.6113	-7.6152	-13.5557	1.86873		92.8963	50.1147	45.0473
436.81	-20.2551	-11.8617	-21.9505	-24.7861	-24.5856	-10.345	-11.8701	-18.3121	-10.3948	-12.4888	2.37433	-12.5798	-7.38981	-13.2894	0.743498		87.8309	49.606	46.0076
438.02	-19.9244	-12.0674	-20.7422	-26.4317	-25.3413	-9.9625	-12.2899	-17.1337	-10.539	-10.7066	3.61831	-11.991	-5.73747	-12.7238	0.713039		89.4239	52.9164	48.8893
439.23	-20.1257	-11.7064	-21.2898	-25.0914	-25.3063	-9.56253	-11.0101	-15.4924	-10.6976	-10.061	2.3088	-10.7896	-5.9409	-13.0726	0.575958		86.2414	53.9994	43.0862
440.44	-22.1487	-12.0327	-23.5871	-25.9882	-25.3414	-9.18749	-12.316	-17.724	-10.9657	-10.5545	3.74414	-12.0027	-7.26226	-14.8251	0.736355		84.4639	52.084	44.8116
441.65	-18.623	-12.6323	-22.1731	-25.5689	-25.6475	-8.31199	-11.0551	-17.9812	-10.5075	-11.1651	2.64056	-12.6944	-6.56247	-13.569	-0.702713		88.3485	54.2591	46.4585
442.86	-20.9252	-12.6072	-23.6696	-25.1945	-24.6321	-10.1333	-11.3959	-17.4754	-11.252	-10.5296	0.974332	-12.9751	-7.64529	-14.5627	-0.519377		88.2786	49.6587	44.4701
444.07	-21.0421	-11.808	-24.4693	-24.9894	-25.5669	-11.169	-11.6001	-18.2629	-11.1406	-12.9799	2.71542	-12.2993	-7.21442	-14.0803	-1.68409		87.6472	51.6075	47.5603
445.28	-21.3304	-14.6208	-22.8698	-24.8298	-25.8159	-9.25315	-14.4064	-18.5828	-10.9245	-12.5161	3.26628	-11.9517	-6.32374	-12.3606	-0.0688333		85.2301	48.3478	45.9441
446.49	-20.6374	-13.7835	-22.91	-24.8014	-25.1429	-10.7815	-12.925	-17.5129	-11.5843	-12.729	2.22815	-12.2162	-4.53563	-14.4086	-1.24351		84.5282	50.2101	45.8616
447.7	-21.6781	-14.045	-22.2973	-25.8709	-26.8149	-9.11642	-12.0643	-17.2148	-11.0277	-10.6863	0.812671	-12.8688	-8.649	-14.7989	0.0154105		87.3931	55.2062	43.8274
448.91	-18.9546	-12.9713	-21.2817	-23.826	-25.2714	-9.34966	-11.6929	-17.5825	-10.729	-11.867	0.356557	-12.8274	-7.35402	-15.46	0.387917		91.5786	50.9507	43.2834
450.12	-20.4664	-11.8694	-22.6857	-26.3134	-24.3659	-10.0038	-13.2703	-17.0764	-10.1696	-10.262	3.0446	-11.8269	-8.54959	-14.4313	-1.40091		90.0974	54.7209	42.5817
451.33	-21.064	-11.9423	-24.4271	-26.6769	-25.2366	-9.51443	-10.6053	-16.5846	-11.5962	-11.0262	0.738988	-14.3999	-7.84078	-15.732	-0.858033		86.6535	50.3534	39.9964
452.54	-19.5568	-13.3288	-22.4871	-26.5956	-25.47	-9.93004	-10.8953	-17.9992	-8.45803	-11.4134	0.419294	-13.1658	-7.44039	-15.1144	-1.05585		88.8246	53.1677	43.1411
453.75	-19.7698	-13.8696	-21.2827	-24.7783	-25.4468	-9.19382	-12.6213	-17.1749	-11.049	-13.5998	-0.606566	-12.7935	-9.11517	-16.6694	-0.401099		81.0827	55.9091	39.7836
454.96	-21.1498	-12.1371	-21.8116	-24.8721	-25.3482	-9.9373	-11.2583	-17.7196	-10.6711	-11.5676	1.47967	-12.1322	-6.53296	-15.4666	-1.35672		83.4719	55.0703	41.8041
456.17	-20.957	-11.3911	-23.2705	-24.972	-25.5232	-9.65358	-11.0966	-17.0435	-10.4754	-10.6306	1.09598	-12.8236	-9.18909	-14.5868	-1.42216		86.3896	55.7556	42.6126
457.38	-20.561	-10.973	-23.3328	-25.6514	-24.569	-9.88447	-11.6484	-17.0347	-9.09324	-9.6768	0.914589	-14.7879	-9.05792	-16.5908	0.936427		88.4069	56.0909	41.9141
458.59	-20.6655	-10.6094	-22.1499	-25.7366	-25.0051	-8.91194	-13.1128	-15.2893	-9.13915	-11.1319	-0.853549	-14.4552	-8.96419	-17.3776	-2.44621		85.4342	55.5432	39.4995
459.8	-19.8588	-12.293	-22.0281	-26.7338	-25.3195	-9.06203	-11.574	-16.5212	-8.43046	-9.30501	-0.0529949	-15.3627	-10.3715	-18.5161	-2.9355		87.0493	57.0343	41.2713
461.01	-21.0495	-12.7885	-20.7666	-24.9593	-24.206	-7.79227	-11.6475	-17.7264	-8.98933	-9.1541	1.87541	-14.2881	-9.44242	-17.0164	1.07652		83.0345	58.4037	40.1367
462.22	-17.6073	-12.3637	-22.2444	-24.916	-25.2296	-8.49131	-10.619	-16.72	-8.28298	-9.10108	0.48566	-12.0048	-9.75703	-17.419	0.521424		82.6437	57.7294	42.2118
463.43	-19.7605	-11.7203	-22.6709	-24.9104	-25.1927	-7.41854	-11.4214	-16.2583	-9.08921	-9.90343	-1.03201	-12.42	-8.45803	-16.5352	0.364225		83.782	60.6021	39.6784
464.64	-19.8547	-10.579	-22.6578	-26.0872	-25.3597	-6.51622	-11.1051	-15.5183	-7.84128	-7.00621	0.870531	-13.6846	-10.2205	-16.4573	-1.60041		83.9839	56.1324	42.1055
465.85	-20.3705	-11.7805	-22.2732	-25.3081	-25.8294	-7.39132	-12.5966	-15.5005	-9.94902	-9.66867	0.269277	-11.8422	-9.08449	-14.9681	-2.13464		85.5084	60.3599	44.267
467.06	-19.1657	-12.1511	-23.0694	-24.9859	-25.1529	-8.29501	-10.4506	-16.9812	-9.96602	-10.9121	-0.201897	-13.954	-9.91055	-15.2087	-0.519377		81.3492	59.9528	39.5088
468.27	-20.3498	-10.3154	-21.1655	-25.2679	-24.4249	-9.69893	-11.1558	-16.3129	-10.1752	-10.6253	0.73362	-13.9171	-10.1016	-15.7781	0.438687		82.2856	58.9088	41.5161
469.48	-19.7621	-10.1709	-22.8736	-25.1139	-24.3552	-6.77266	-9.37463	-16.2296	-6.76074	-8.77249	1.02634	-11.982	-6.96657	-14.9037	-0.855589		77.9345	59.2741	44.158
470.69	-21.0419	-9.62506	-21.9763	-25.5151	-26.074	-6.87338	-10.7017	-16.2862	-8.51194	-10.6038	2.04822	-12.5452	-8.19911	-15.2217	1.81288		83.2747	55.8652	43.8297
471.9	-21.5928	-9.6173	-20.8464	-25.0428	-23.7649	-6.89858	-11.0611	-17.1372	-8.17348	-9.57501	1.05171	-13.0175	-9.95702	-15.8603	0.226201		78.7474	57.4844	44.3968
473.11	-18.3734	-8.57371	-19.7296	-24.7413	-24.1139	-8.90072	-11.7297	-16.8379	-9.26795	-10.4399	0.300997	-12.6805	-9.4384	-16.5602	0.0554629		78.833	54.5895	43.1599
474.32	-20.0519	-11.0337	-22.3799	-26.2662	-24.7482	-7.43581	-10.1419	-16.8961	-8.03478	-7.93322	1.66851	-12.705	-7.82107	-15.5409	-1.20741		82.2822	56.4388	44.9409
475.53	-19.1586	-9.6847	-24.1837	-26.692	-23.8888	-7.31794	-10.6519	-15.4784	-7.81751	-9.62565	0.0984848	-12.1092	-8.30146	-15.4599	-0.0707124		78.2975	57.4767	44.6792
476.74	-22.0626	-9.29102	-21.9841	-25.7407	-24.8766	-7.43039	-11.6778	-16.0495	-9.90673	-12.0562	-0.388091	-12.9793	-8.86174	-16.1821	-0.268152		81.1585	57.7584	43.1846
477.95	-21.8972	-10.4361	-22.3675	-27.5277	-25.022	-7.51971	-10.2286	-15.3062	-9.49993	-8.19253	-0.72633	-11.7832	-8.08519	-15.4033	-0.460333		76.459	57.8219	43.4562
479.16	-19.6157	-9.87369	-21.8267	-26.1786	-25.6713	-8.00456	-12.0367	-15.4563	-10.378	-11.6194	-1.62002	-13.0571	-9.25439	-16.7563	2.92946		74.5911	56.1171	42.3327
480.37	-20.2888	-9.91622	-22.2207	-27.0413	-25.7114	-6.75166	-10.7642	-16.2788	-9.7158	-10.9409	1.30936	-12.1933	-8.99772	-15.2702	2.38734		74.8181	58.889	42.7331
481.58	-18.1693	-10.1269	-22.5172	-26.948	-25.3823	-7.96036	-11.6078	-16.8246	-9.21622	-10.0903	-0.168992	-12.3492	-9.69222	-13.9695	-1.06882		76.1207	56.9925	44.8321
482.79	-19.1641	-10.4488	-21.5761	-27.2157	-24.5964	-6.92914	-11.1428	-16.5988	-8.08702	-11.7681	0.658961	-11.6979	-8.02823	-13.7196	0.414242		72.2105	53.7649	43.3063
484	-20.2351	-11.474	-23.024	-25.8113	-24.6928	-6.29702	-12.1188	-16.3574	-9.16723	-10.3232	2.27987	-10.8648	-9.06478	-14.233	1.85331		72.6655	53.6598	43.7753
485.21	-20.7983	-10.1188	-21.9545	-27.1367	-25.6403	-6.64071	-11.286	-16.0186	-7.18655	-10.1726	1.66934	-12.1852	-9.54664	-15.1442	-0.19952		74.8657	59.5541	42.0612
486.42	-20.8608	-11.6565	-20.5724	-25.8508	-25.1756	-5.62358	-10.9236	-14.9085	-6.96	-11.1163	1.71912	-11.3026	-7.67	-15.5683	2.52762		72.8877	58.701	43.5005
487.63	-21.7332	-9.11721	-21.9667	-24.7993	-25.2509	-10.0883	-13.2512	-16.5149	-7.89066	-8.83279	-2.16878	-15.102	-9.62556	-18.4192	-0.508094		70.2821	60.2151	38.0593
488.84	-21.3715	-12.6552	-24.8517	-21.3414	-25.9946	-10.9515	-12.5592	-17.5367	-9.63577	-11.6839	0.0598685	-13.7368	-10.0439	-17.7995	-1.88116		66.3955	56.9795	38.193
490.05	-23.2412	-13.5384	-24.229	-22.3894	-28.4052	-10.9228	-13.8084	-18.3793	-11.4382	-15.2433	-2.26408	-16.7397	-9.86702	-16.7928	-0.641789		69.2688	52.9315	36.7435
491.26	-26.1239	-15.5043	-24.9395	-26.3519	-28.5067	-12.6915	-15.5403	-19.8642	-12.5146	-11.2766	0.14875	-15.6268	-10.4123	-17.9738	-1.324		71.7429	50.4015	38.5907
492.47	-26.0277	-16.0171	-24.873	-27.8982	-29.2359	-11.0854	-13.9446	-21.2733	-13.615	-13.4025	-2.01786	-14.7996	-10.7301	-16.7937	-2.9731		64.2004	51.8077	38.04
493.68	-25.9852	-16.8426	-27.4083	-28.0655	-30.2061	-10.3586	-12.6578	-19.9727	-12.7882	-14.5102	-1.72905	-16.1057	-11.423	-17.6314	-1.00884		61.5394	55.2483	37.4332
494.89	-26.6856	-16.954	-26.5246	-27.2924	-30.4426	-10.9583	-12.8652	-19.9115	-11.7027	-13.8991	-2.29803	-16.9832	-10.6468	-18.8352	-3.50751		62.192	53.5017	35.1053
496.1	-24.7177	-17.7921	-27.2256	-26.4471	-31.0392	-11.0194	-14.2455	-19.4851	-12.3855	-11.428	-2.58223	-17.6344	-10.7862	-18.2498	-3.7074		63.0043	47.8499	32.3508
497.31	-25.0249	-17.3337	-27.5715	-27.3451	-30.1693	-12.9196	-13.5425	-20.0993	-11.7607	-15.1604	-2.25892	-17.331	-11.325	-19.3639	-5.16151		60.0861	50.5852	31.1732
498.52	-22.3762	-14.9061	-26.4132	-25.9323	-29.4702	-14.1814	-14.2681	-20.7172	-15.9268	-15.3136	-2.76355	-17.3649	-11.4856	-18.6902	-2.52858		63.2394	45.4733	32.2016
499.73	-24.2293	-14.5813	-27.3813	-26.2543	-29.9985	-15.8676	-13.7	-21.696	-16.9155	-15.4147	-4.08715	-17.4907	-10.7058	-18.4463	-1.23393		60.8114	44.5738	29.5215
500.94	-22.4738	-14.6113	-26.4145	-23.2177	-30.1299	-15.8381	-15.2918	-19.4436	-15.7077	-15.8209	-3.08206	-17.4118	-10.7213	-18.4057	-1.52896		63.2502	43.2428	28.8296
502.15	-21.4987	-12.3508	-28.0399	-23.6475	-29.1867	-14.8085	-15.7819	-20.9327	-15.8109	-17.173	-2.62511	-17.9683	-8.97086	-17.7524	-1.90523		60.9199	43.5861	31.1353
503.36	-21.0279	-13.1368	-25.9622	-24.3501	-29.0636	-14.2352	-13.4471	-22.2929	-15.2375	-17.2382	-2.58607	-17.9898	-9.37752	-17.5485	-1.4261		62.365	42.6333	33.1189
504.57	-17.9401	-10.5312	-25.9858	-23.1971	-28.61	-13.2499	-13.882	-21.6912	-14.8236	-15.7236	-2.3669	-17.8309	-8.48204	-16.7967	2.094		60.183	45.9198	30.2776
505.78	-18.8736	-12.0846	-27.0724	-23.957	-28.3643	-12.6434	-14.2266	-21.0279	-16.7337	-15.7633	-1.9662	-17.5563	-8.09107	-16.9898	3.39298		61.0317	41.7221	30.3183
506.99	-15.7035	-9.42742	-27.1738	-21.4835	-27.9636	-13.0503	-14.7355	-21.2105	-14.7239	-15.4999	-0.651041	-17.962	-7.90833	-16.0064	4.47759		59.6329	44.7451	31.6031
508.2	-14.7631	-8.32138	-27.2318	-18.5616	-28.4581	-12.6831	-13.2277	-20.3061	-15.5109	-16.5587	2.37119	-16.5099	-6.19002	-14.7535	9.12669		61.7517	45.2691	33.1801
509.41	-11.3588	-5.20157	-26.0751	-20.0564	-27.0068	-11.8663	-13.8754	-20.2859	-14.5915	-14.3462	0.185973	-16.5124	-4.15691	-15.0097	7.21319		60.6497	43.261	29.1275
510.62	-8.50471	-5.84636	-27.5374	-18.0239	-26.4215	-12.2858	-14.7489	-19.9535	-14.7188	-17.0238	-0.0255971	-17.0905	-4.81279	-14.9311	10.2498		59.902	37.8804	30.8837
511.83	-4.38414	-4.63391	-25.5931	-17.5348	-25.5906	-10.3587	-13.3176	-20.2029	-14.8963	-14.2903	-1.20566	-16.5886	-6.85226	-13.93	8.01593		58.5142	41.3696	28.639
513.04	-3.73464	-2.62968	-26.7974	-12.7656	-25.3324	-10.3874	-13.6454	-19.4677	-13.393	-13.0374	-0.865962	-17.075	-4.51152	-15.7642	8.76884		62.3275	42.056	27.6184
514.25	-0.751283	-1.50828	-25.7874	-10.9099	-23.2136	-10.0293	-12.5896	-18.556	-15.5391	-13.7002	-0.285548	-17.1281	-2.91477	-14.8318	11.3927		61.9452	43.075	27.75
515.46	4.59896	-0.604982	-25.2825	-10.5389	-22.1877	-9.56518	-12.5028	-19.5546	-14.889	-12.6436	1.32853	-14.883	-2.69203	-12.7551	13.5338		61.7086	43.5774	33.0431
516.67	6.29153	3.12978	-24.4544	-11.3534	-20.6287	-7.04032	-11.8704	-18.7474	-12.7285	-12.6838	2.97614	-13.2924	-1.79998	-11.1344	16.8215		61.4506	41.5006	31.9082
517.88	11.322	3.66922	-23.845	-7.20942	-20.3307	-6.12996	-11.8013	-17.2502	-11.8596	-10.597	1.8202	-13.8528	-0.611469	-10.2761	16.7131		64.7687	42.2762	30.0551
519.09	14.6424	6.74844	-22.8316	-5.82853	-20.2306	-6.67891	-12.36	-18.9619	-11.7914	-10.3846	1.70985	-15.2237	0.623312	-11.3073	17.2041		66.7107	41.4387	30.839
520.3	17.5578	13.1502	-22.5359	-2.02647	-17.8457	-5.81453	-12.9242	-16.5953	-11.5528	-11.491	2.55063	-12.7954	0.583115	-10.8004	21.1708		69.0601	41.6059	27.6878
521.51	22.4648	14.4484	-20.74	1.12111	-14.7826	-4.99583	-11.7293	-16.3733	-12.0389	-11.5451	3.48977	-14.8348	0.754295	-8.54107	21.2682		71.143	42.9359	30.9891
522.72	23.841	16.6491	-21.4827	-0.0138524	-14.385	-2.9396	-11.9026	-15.9488	-11.5721	-11.0056	3.47499	-13.3935	1.91908	-8.77756	24.5764		68.4857	40.288	29.5894
523.93	24.849	21.0307	-19.2221	3.33834	-14.4338	-1.94486	-10.2445	-14.3922	-9.06119	-5.98214	3.0218	-12.1635	2.32692	-7.10276	23.4752		70.0974	42.8374	30.9294
525.14	30.8174	18.7876	-20.0238	6.91404	-12.6391	1.34052	-11.4012	-14.4176	-10.3034	-7.99148	4.60876	-12.5524	3.79562	-7.76031	25.3101		71.1058	40.4484	29.4228
526.35	33.2408	22.3067	-18.9934	10.3669	-11.0313	-0.73477	-10.5973	-14.389	-10.7438	-8.80213	3.1783	-12.4792	6.12333	-6.36983	28.3686		69.7704	42.1228	29.8373
527.56	35.3355	24.8059	-18.4772	10.811	-10.4405	0.21209	-9.02968	-13.7954	-8.58616	-8.79095	5.61651	-9.94358	7.97664	-5.8518	30.3144		74.716	43.0208	31.6365
528.77	41.8227	31.1478	-17.6921	9.64471	-8.43851	2.4191	-8.56263	-12.0901	-7.48648	-7.25638	7.31751	-8.43329	9.83553	-3.70165	34.0888		75.1759	44.8024	33.881
529.98	44.3474	29.895	-15.9597	13.6987	-6.74853	3.1143	-7.25635	-11.8919	-7.33045	-7.56346	4.80263	-9.62051	7.86243	-4.82302	35.6798		76.9458	47.1622	29.5206
531.19	45.6638	34.6165	-15.5203	13.4928	-4.88585	5.76387	-8.29595	-11.3591	-6.21876	-4.50024	6.01831	-7.25043	11.1359	-3.50156	36.6448		73.3	47.4145	31.8439
532.4	49.9209	33.8491	-13.5775	16.9577	-5.18141	6.94276	-7.61738	-9.79857	-5.92073	-6.07309	7.91751	-7.71744	10.8193	-1.98736	35.9543		73.1489	46.1961	32.6685
533.61	57.8073	39.9601	-11.7693	22.0132	-1.87067	9.06052	-7.40461	-9.03282	-4.62783	-5.91896	5.379	-7.17334	13.2486	-0.0227673	41.1369		80.3316	46.2732	35.0186
534.82	57.0604	42.9427	-12.1438	23.4639	0.0934891	7.60268	-6.76816	-7.58047	-2.55275	-2.0268	7.97286	-6.17617	13.4332	0.244047	44.3018		81.9666	46.4449	32.401
536.03	57.7724	43.1245	-10.5013	24.7325	1.08343	10.3546	-7.10323	-7.19362	-3.27118	-0.56947	8.00722	-4.6905	13.8515	1.51827	45.0133		78.0676	45.0771	32.3007
537.24	65.6222	45.2247	-9.68038	24.9232	1.82482	9.4629	-6.66144	-6.41444	-2.47614	-4.99839	7.63595	-5.19451	14.6766	1.98697	45.996		84.1061	44.9078	33.61
538.45	66.6781	48.2129	-11.7225	28.2687	3.59463	9.47015	-5.95826	-6.24921	-2.18952	-2.86421	8.79719	-4.22043	16.8431	2.9549	47.64		81.2685	42.721	32.909
539.66	67.8182	53.1435	-8.08077	30.8361	6.92972	12.1961	-6.14689	-5.49891	-0.85283	-1.26748	9.52901	-3.84124	17.077	4.1611	49.0772		83.8628	46.6256	31.8658
540.87	72.8092	52.4793	-5.94816	34.1235	7.70607	12.3477	-6.5885	-4.19941	-1.20382	-1.84032	10.5329	-4.99427	16.8229	3.31708	45.9321		88.0862	43.0065	31.7585
542.08	72.1508	55.4781	-6.06154	37.7138	8.77144	13.8317	-6.33523	-4.27467	0.525631	0.739999	8.6218	-3.13912	20.1933	4.16856	50.5753		84.4047	44.2191	32.8322
543.29	80.7269	56.129	-4.85619	37.5137	9.11393	17.1733	-4.7539	-3.55991	1.28343	2.41228	9.7967	-2.29676	22.5179	5.48515	49.6733		86.6787	47.153	34.8526
544.5	82.1013	54.1559	-4.85044	41.4775	9.19053	18.4125	-3.12924	-2.5498	2.25022	3.23563	10.7388	-2.05619	23.3204	6.49812	54.8592		90.3833	47.6512	33.3032
545.71	83.3422	60.2584	-2.31812	46.9223	13.307	18.4339	-3.39238	-1.69599	3.34397	2.97648	11.356	-1.2744	22.4452	8.07676	55.6161		89.6399	48.4991	34.7814
546.92	84.7705	65.0392	-4.00794	46.8116	14.6958	20.2624	-2.24242	0.060359	3.73287	2.72614	12.7556	-0.239409	23.1592	8.72158	57.3164		88.4363	47.2189	34.4075
548.13	90.8589	68.208	0.411093	47.5581	15.3155	21.1108	-2.51604	-0.0126034	4.90396	6.22059	13.7365	0.737222	24.9377	9.89476	60.5568		88.2911	47.2547	35.1307
549.34	91.1845	67.8694	-0.115372	48.9247	16.8539	25.5734	-0.572964	0.713751	3.38406	9.1959	13.2031	1.43392	29.0754	11.1666	60.7857		94.2371	50.7451	34.7253
550.55	94.4799	66.3254	2.89582	51.5662	20.6376	25.5226	0.0413929	1.28638	8.07261	9.67642	13.955	2.67477	28	11.9966	63.5423		94.4743	49.2549	37.1849
551.76	96.1122	69.5541	3.19879	57.8246	22.0426	26.2928	0.131249	2.85387	6.9103	11.0641	12.8851	2.16869	27.0882	10.9125	64.667		92.0006	51.2295	35.3568
552.97	97.9914	76.6903	5.76968	56.3058	23.4564	28.9799	0.962333	4.89336	8.98303	9.87646	12.6578	2.60438	27.903	14.0089	65.0337		95.1597	51.1778	34.943
554.18	101.976	77.8609	4.52623	59.4767	23.5116	28.6913	-0.720556	5.18163	9.73311	10.7542	13.707	3.67094	29.245	16.1994	68.8727		93.4222	49.5351	36.7168
555.39	100.467	78.4679	5.9686	60.8966	25.4426	30.6197	0.363848	6.5948	7.49876	14.7356	15.5453	4.81721	29.7742	17.7182	65.7005		88.4982	46.7855	36.2209
556.6	104.663	80.7677	8.28427	65.4389	26.1272	33.532	0.585501	6.49767	10.4977	12.9932	14.9854	3.92884	34.2542	19.558	72.1079		97.1026	51.5659	36.6122
557.81	108.761	82.6216	10.8562	69.4431	27.7096	34.5107	1.19668	7.4581	11.9656	11.4464	17.6275	6.35153	34.9615	18.7734	72.7279		97.6799	52.9814	36.6325
559.02	110.37	86.0408	9.21635	67.3379	28.522	36.1999	2.47873	9.25744	12.9071	16.2952	16.7035	7.24303	36.7848	19.3417	74.4122		95.8278	52.5866	37.3453
560.23	109.42	84.5268	10.0417	67.4452	31.1367	41.222	3.62576	10.6095	15.4912	16.4872	19.8231	7.30417	41.2815	22.1418	78.5977		96.7407	53.2134	38.1429
561.44	110.487	88.7851	12.628	74.1365	31.6033	40.6927	6.82728	11.3375	15.5041	16.4667	19.7527	9.47827	37.8754	22.1621	82.1007		92.1254	57.162	40.4032
562.65	110.633	90.9515	13.3147	75.5038	33.3134	42.9424	4.59382	13.0314	16.7914	18.0085	19.1818	9.41928	42.8077	23.4105	80.7386		102.236	55.4592	38.4325
563.86	110.28	92.6053	13.8687	81.0348	34.4618	45.545	6.88585	13.1568	17.8806	20.2484	20.0071	7.80542	41.8808	23.7074	82.5671		98.9368	57.6609	37.7552
565.07	113.107	96.245	15.7638	81.273	35.0611	43.1855	4.987	12.9091	17.9256	20.7518	20.0317	10.4144	44.8659	24.6068	85.2235		99.4648	54.3963	39.9709
566.28	110.472	91.8633	12.879	83.8235	34.7721	45.9465	5.76593	13.5076	20.5495	21.5395	21.5243	10.4318	43.9182	26.2973	83.9753		95.2592	56.1643	38.1222
567.49	115.441	98.2697	17.9553	88.9598	39.2404	45.13	6.23565	15.2448	19.1994	18.8624	21.5779	10.2363	46.5474	28.5064	85.0405		101.14	52.9482	39.0454
568.7	120.557	103.438	21.7548	88.7828	38.446	48.7321	6.62975	16.4028	21.5178	20.6625	23.2524	12.7069	46.4778	33.3224	90.7442		102.94	53.2151	40.2914
569.91	119.8	101.159	18.9168	94.8129	40.9824	50.9988	6.61952	17.1773	21.9492	25.4735	20.9934	13.5349	46.9837	26.5663	88.02		107.422	54.5625	35.2325
571.12	121.077	103.587	19.7556	96.2022	43.9206	50.8885	9.64308	18.0191	21.0013	24.8972	24.6933	13.7125	51.1754	32.7867	93.703		103.645	56.3094	43.2969
572.33	123.068	110.18	23.0797	92.7239	44.1627	53.383	9.18391	18.2653	24.2544	26.7529	28.0384	16.5598	55.2293	36.861	97.8611		107.445	55.5366	45.3
573.54	127.891	111.134	22.7525	97.1229	46.6666	54.7065	8.9969	20.8911	24.6195	24.7718	27.9284	14.7337	54.2745	35.3492	96.6892		108.643	52.5541	42.2708
574.75	123.386	110.022	26.8864	99.0341	48.056	57.9138	11.3934	22.4355	26.0376	26.5378	26.0977	18.192	55.2001	37.0114	101.618		105.435	55.1317	41.9467
575.96	127.616	110.737	25.8704	97.7168	47.7952	55.4453	11.1844	23.0228	25.0903	25.1775	25.161	17.0196	56.7547	36.2858	100.522		104.541	59.4358	42.3805
577.17	124.324	111.8	24.6393	102.083	49.5197	56.9591	13.6648	23.7181	27.9176	27.3799	26.453	18.0458	55.385	36.0632	100.429		102.969	58.7756	41.3667
578.38	121.815	114.491	27.0242	105.056	48.0702	58.7519	11.6692	23.5242	25.9679	27.907	29.4677	19.0467	57.9402	37.0328	98.8208		106.81	61.7475	41.9737
579.59	124.278	113.491	29.8066	106.132	49.5621	64.2529	13.6592	25.335	29.2646	32.0199	28.8407	19.4862	59.7749	39.7698	106.132		107.56	61.7194	41.0518
580.8	121.362	117.294	32.0455	107.477	54.0496	64.4974	13.8679	28.4921	32.2962	31.4597	28.3776	19.8148	60.7258	41.4066	103.022		109.171	61.7537	42.0384
582.01	121.214	112.79	32.9049	104.596	51.7682	61.0534	13.751	27.1788	28.7981	30.2487	31.3378	22.8196	63.9024	41.1654	105.744		106.751	62.0114	41.2454
583.22	127.634	117.286	31.0342	116.73	53.1686	65.3964	18.2069	29.2053	31.739	34.7013	29.5327	21.1345	61.8453	45.8731	106.89		110.239	62.2807	41.4856
584.43	129.337	121.804	35.0756	116.579	57.3933	66.614	16.2997	29.4108	32.3195	35.0153	29.1943	22.03	59.9635	43.7631	106.299		112.992	66.1864	43.5152
585.64	129.958	121.287	34.8358	116.527	58.4749	68.8235	17.2304	31.7854	34.5284	35.6336	29.884	23.0387	63.3033	45.5343	103.999		112.355	65.832	44.2017
586.85	126.963	121.482	34.0975	116.16	57.0369	71.6083	18.0271	34.3651	37.7239	36.5919	30.217	24.0256	64.7973	44.6929	110.15		112.701	65.5777	42.9254
588.06	124.046	122.652	36.1041	123.22	57.4968	72.4633	17.872	35.4915	36.7685	38.1798	30.7038	24.7596	63.5166	48.3116	112.733		111.866	65.9672	43.7251
589.27	128.857	130.313	41.5161	122.937	59.5328	75.5041	19.3102	36.5732	40.8159	39.3685	32.4094	26.1549	66.8605	49.4479	113.494		115	68.9684	44.4461
590.48	130.755	122.587	43.5185	121.746	60.251	75.8153	20.4449	34.1223	38.0306	37.733	35.0382	26.643	69.2024	53.0322	113.718		113.115	68.6302	46.3713
591.69	129.839	124.562	40.6302	119.335	60.9011	76.9063	20.0219	37.4104	39.9181	41	35.1294	27.5509	68.6918	54.6923	114.785		113.297	66.5613	46.3013
592.9	131.375	129.182	41.4497	118.954	62.7394	80.6647	21.702	39.0786	44.1002	42.5009	35.3618	30.7674	74.3872	53.9136	119.165		111.894	71.4636	44.7315
594.11	130.988	126.659	45.0379	124.162	62.3181	82.1723	23.8079	41.3416	44.3763	45.633	36.8886	30.6197	71.5715	53.4395	116.799		115.521	70.1912	46.7993
595.32	129.789	128.935	44.3566	125.56	63.4197	82.3385	23.166	44.5552	44.2878	46.6517	35.8604	29.4541	72.0742	55.5177	114.868		116.453	71.1254	48.1542
596.53	133.139	128.64	46.2743	127.037	64.6323	83.1805	25.3486	43.8319	45.2613	47.5826	35.7812	28.7702	72.7384	55.9533	114.6		115.183	70.757	46.9235
597.74	129.37	127.643	44.2014	124.045	65.5893	87.837	23.1767	44.5761	48.6356	47.0216	36.6768	29.9492	75.3695	58.8859	118.626		115.24	66.8309	43.8612
598.95	130.634	127.824	46.3434	130.07	65.6269	87.5803	23.1843	43.5234	46.4259	46.88	40.7265	30.5841	74.8093	59.7422	118.564		116.851	70.6874	47.6192
600.16	131.888	133.861	53.8374	128.742	68.6402	84.4259	23.7704	45.798	47.5829	51.0616	37.513	30.7781	76.429	57.3804	116.389		120.998	69.7007	46.1286
601.37	131.9	136.657	49.2533	134.919	72.6323	89.8232	25.3934	46.0619	48.9408	48.8104	38.4298	32.1656	80.4548	61.314	121.831		119.843	73.5487	47.8323
602.58	131.634	135.635	52.35	133.446	69.4639	91.827	27.9467	45.8412	47.9156	48.1474	40.2941	35.4878	83.2213	65.0085	124.461		116.138	70.8131	49.9514
603.79	130.946	131.428	52.6843	131.703	67.9223	92.6164	28.8293	49.9067	53.7191	51.9425	41.9735	37.8189	82.9961	67.0699	127.358		119.561	74.6728	51.8496
605	127.318	135.766	52.6687	129.876	70.5729	93.4671	26.4526	48.1613	48.6629	48.9644	44.483	37.8016	81.4976	67.8164	125.127		114.623	72.0709	49.6863
606.21	133.699	135.364	55.9477	133.231	72.2792	95.888	32.4198	48.0864	51.2776	52.1438	44.5518	40.783	84.2888	68.4943	130.576		120.65	74.3471	51.1101
607.42	128.749	129.519	56.4894	133.03	74.7628	93.7264	29.752	52.6985	53.9173	51.2613	41.4966	37.4092	86.1128	64.8591	125.095		119.781	75.1948	46.2511
608.63	131.16	135.631	58.9172	134.842	72.8346	94.576	27.5887	53.5427	52.6249	50.3956	41.2477	38.3412	85.0914	67.4102	125.294		120.861	75.294	47.6654
609.84	133.882	133.061	57.8172	132.961	72.6046	96.5239	30.7496	53.6564	54.8668	54.2469	40.3984	37.7089	82.5785	66.8429	124.541		123.789	78.1495	45.5601
611.05	127.874	131.198	56.5754	135.271	72.2836	97.3945	32.3273	53.9708	55.7001	54.4743	41.0074	38.9759	88.172	70.2946	127.086		122.294	76.0105	48.8761
612.26	128.002	134.569	57.0395	132.706	74.5114	100.549	31.0854	54.0004	56.5238	57.6472	42.2943	40.2637	85.0251	69.2447	128.214		116.374	79.0679	49.818
613.47	126.509	129.758	54.6895	136.073	73.7145	104.767	31.5531	57.3956	59.4096	61.451	40.8009	39.3419	86.9631	72.1388	123.648		115.188	76.6565	49.3923
614.68	125.206	137.348	60.243	137.393	77.5174	101.642	33.5086	62.8985	60.388	58.4772	43.5977	38.8444	86.5251	72.8259	125.638		123.432	80.1454	49.3985
615.89	125.607	132.391	58.28	138.096	73.7969	100.06	32.8056	59.0356	62.6729	57.7428	43.9609	40.5362	84.7786	75.0694	123.2		125.024	80.6682	48.7301
617.1	128.687	139.215	65.3328	135.606	78.7603	109.037	34.1482	59.8511	63.8634	64.701	44.4296	39.6068	87.0116	77.6603	126.403		123.63	82.2889	48.4145
618.31	133.218	138.199	65.0228	139.901	79.9412	109.562	35.7347	61.1427	65.4117	60.4848	45.8334	42.3441	86.6032	76.2436	130.053		124.714	82.7756	54.3739
619.52	128.5	138.125	63.0372	136.54	79.9545	108.349	34.293	63.966	65.0435	63.7437	46.1782	42.2729	87.0036	77.5033	127.093		125.158	78.6028	48.0638
620.73	128.161	141.392	63.9931	134.907	83.2073	110.296	36.4152	63.4032	66.1216	63.6863	43.3201	42.8548	88.8448	77.0457	127.698		122.579	82.4543	50.0327
621.94	133.438	142.955	64.7314	144.315	79.7726	114.351	37.9789	64.3108	66.6663	65.5616	46.6112	46.6065	91.3627	79.74	134.86		128.252	85.8165	50.9078
623.15	126.935	136.496	67.1665	140.289	82.4766	112.708	36.8482	65.508	67.9482	64.3619	45.3503	45.1572	90.7729	81.3258	129.918		121.624	80.8532	49.6005
624.36	123.515	131.848	63.6557	146.079	79.3782	112.16	38.6122	65.8673	67.0126	67.5217	47.1077	43.4768	90.9411	78.5926	129.954		126.654	86.6747	50.767
625.57	126.27	137.624	66.6865	139.189	81.5834	111.641	37.3464	68.6465	72.5142	70.3569	46.4682	48.4174	90.3734	82.6049	129.958		121.372	83.1746	51.0853
626.78	125.764	136.816	70.4298	143.798	82.7177	113.527	38.9419	67.3229	71.5614	65.701	46.1534	45.3171	90.6378	83.1453	130.481		124.75	81.0711	49.5693
627.99	129.362	139.499	69.922	140.591	88.3192	110.303	38.1414	68.3636	68.2818	66.3584	46.9751	46.3429	88.1279	85.4801	131.65		125.701	85.1543	50.3318
629.2	126.455	135.294	72.3523	143.172	84.67	112.384	40.8473	70.5801	71.9504	67.8857	45.8409	47.6567	91.3479	86.1106	130.991		131.123	88.7922	53.5667
630.41	127.691	143.091	69.0151	140.557	87.7252	120.148	39.1366	70.9588	73.1938	70.6445	48.7505	50.0247	94.7591	88.111	137.532		126.403	87.6223	53.4981
631.62	131.966	137.012	71.6101	145.369	85.8292	117.455	39.6925	71.0848	73.5798	72.1637	48.1093	48.1337	94.6795	90.2794	130.501		132.731	87.4158	49.6553
632.83	129.097	139.648	71.0836	143.474	85.8558	114.647	43.1593	71.7563	72.7222	72.0399	48.8422	51.3536	93.8238	89.3494	134.998		126.188	85.7165	53.585
634.04	125.178	136.076	71.9513	148.068	85.0057	119.351	42.5232	75.535	75.4039	75.1366	47.7009	50.0835	91.3037	88.5452	131.877		127.832	87.7348	51.3122
635.25	121.857	139.639	70.9183	137.451	87.3786	119.857	43.3921	79.2694	76.4987	76.7144	47.2781	48.6971	90.2676	89.0414	130.215		124.193	87.9457	50.3603
636.46	125.318	139.782	76.0437	142.148	88.3117	119.679	43.7399	78.5971	78.3146	78.9956	48.9241	51.2052	96.4654	91.8883	136.813		131.456	92.8281	53.784
637.67	125.821	140.947	78.2258	147.095	86.9473	123.499	48.3727	80.0456	79.3639	78.5059	48.5426	51.5483	93.9904	93.629	129.47		127.838	89.6155	51.3144
638.88	121.108	134.719	76.6183	138.046	88.7469	124.208	48.6607	79.808	79.9766	80.8384	51.408	50.2995	94.8525	93.9069	127.379		128.385	89.7887	53.5793
640.09	124.154	140.098	75.0381	145.932	87.1319	125.214	47.9221	81.1764	80.3677	77.7913	48.8692	53.2155	96.1444	95.3708	137.878		127.511	91.2807	52.4395
641.3	121.709	139.36	76.7119	138.491	89.1962	122.72	47.6502	81.328	80.4456	77.9673	52.4567	53.6497	96.6052	98.4797	133.489		129.173	90.6147	54.2802
642.51	127.481	136.688	75.5157	141.153	89.415	119.658	48.476	83.1075	82.3661	80.4483	50.1277	56.0555	97.7908	100.234	132.591		126.491	88.6336	53.9511
643.72	120.149	133.899	78.1782	143.429	88.5374	124.555	46.8947	80.9129	81.5059	81.5246	50.9926	53.052	98.0709	100.714	131.411		129.38	91.6154	55.9114
644.93	125.359	137.03	79.5965	142.403	90.4331	126.891	46.2773	83.8855	86.3116	83.1431	50.8292	56.7396	99.5673	100.323	141.368		132.097	93.529	55.9967
646.14	122.356	137.302	78.0231	142.796	91.9057	125.127	49.979	85.3863	85.6383	82.7585	50.1041	57.5082	96.7275	101.512	138.536		127.699	92.1179	55.4602
647.35	121.256	135.606	80.2166	147.575	92.5592	122.154	51.326	85.2499	84.3342	81.1477	49.9451	56.4806	95.4967	99.6926	136.124		135.473	95.0898	53.824
648.56	124.178	139.351	81.7549	141.387	91.7865	123.066	46.4556	86.0379	85.7231	79.2468	51.022	54.7623	97.5876	95.8383	127.384		129.791	93.2825	53.4799
649.77	119.475	140.031	86.4512	145.605	90.7	120.778	47.0291	85.4378	81.9448	81.4253	50.1482	59.8528	94.4382	103.802	138.434		136.069	90.2743	55.6401
650.98	122.623	139.61	82.3929	144.665	93.6331	122.734	48.2195	82.5896	84.6665	83.5341	51.0688	57.0168	96.335	103.698	135.324		133.577	90.5876	54.3826
652.19	122.72	135.463	87.4462	145.775	95.5497	124.857	47.7961	83.6698	84.7282	87.5018	50.131	59.6668	98.9129	103.291	134.223		132.635	92.7195	56.944
653.4	120.463	136.651	86.8217	151.548	94.5253	122.387	47.9548	89.5484	86.3332	82.8615	52.1161	59.4346	96.6395	100.887	133.838		136.709	91.7099	55.3326
654.61	124.123	141.643	92.5732	152.004	96.0379	122.826	51.1911	84.9358	82.2491	81.7881	53.0319	58.1619	94.8112	103.984	132.188		140.298	92.4735	55.3197
655.82	119.422	142.306	85.7075	143.317	98.5067	127.955	51.2792	90.3184	91.1566	89.5311	49.3652	59.8774	96.325	102.151	138.29		137.791	93.7814	53.8672
657.03	121.448	141.149	88.2992	151.657	101.047	120.587	51.7001	90.8218	85.7536	85.4941	52.3833	57.1013	94.6208	104.096	134.509		139.352	97.9044	57.2099
658.24	119.12	133.048	84.642	145.413	92.044	123.73	53.0603	88.5666	89.6718	85.5034	52.5044	60.5834	91.8929	101.45	134.419		135.134	94.4122	60.3686
659.45	118.692	133.602	83.2523	146.777	95.0337	123.027	50.217	89.3273	88.5282	87.4982	52.1802	58.8492	97.6048	106.625	129.229		134.418	91.3537	54.3452
660.66	122.941	136.417	81.5407	141.918	94.2269	125.455	52.8152	88.6932	90.5279	89.7586	53.1806	61.4989	96.4395	108.299	133.246		132.754	94.2328	55.9007
661.87	116.998	136.74	89.6726	146.204	99.327	122.364	53.8052	90.2028	86.6717	84.7296	53.9307	62.298	97.5529	104.005	131.525		139.043	94.5762	57.452
663.08	118.276	138.326	90.609	146.582	97.7895	124.337	55.0766	93.9427	89.4826	91.0182	54.4007	60.567	97.4901	111.466	130.636		139.928	98.1608	61.9117

## Sheet: Panel d (barplot)
Distant cells	Target cells
5.23204	45.0419
0.190223	54.8769
2.1233	101.966
-5.38404
1.30578
0.318622
-1.49539
3.23186
3.60085
-1.46004
3.02353
-2.65786
-7.41039
-4.86627
1.89585
